# Supplementary material for: Proteomic Analysis of Prehypertensive and Hypertensive Patients: Exploring the Role of the Actin Cytoskeleton
Source: MDPI journal article supplement (doi:10.3390/ijms25094896), 2024-04-30
Supplement: s1 [file s1]

**Supplementary Table S4:** Significant proteins differentially expressed between hypertensive and prehypertensive in the study groups after excluding participants taking hypertension treatment

| Hypertension   Prehypertension |          |                                                     |        |         |
|--------------------------------|----------|-----------------------------------------------------|--------|---------|
| UniProt                        | Gene     | Protein name                                        | Log2FC | q-value |
| P16591                         | FER      | Tyrosine-protein kinase Fer                         | 1.29   | 0.0015  |
| Q06187                         | BTK      | Tyrosine-protein kinase BTK                         | 1.27   | 0.0017  |
| Q08752                         | PPID     | Peptidyl-prolyl cis-trans isomerase D               | 1.32   | 0.006   |
| P41240                         | CSK      | Tyrosine-protein kinase CSK                         | 1.25   | 0.0016  |
| P05771                         | PRKCB    | Protein kinase C beta type (splice variant beta-II) | 1.24   | 0.0026  |
| P15498                         | VAV1     | Proto-oncogene vav                                  | 1.20   | <0.001  |
| Q99714                         | HSD17B10 | 3-hydroxyacyl-CoA dehydrogenase type-2              | 1.04   | 0.0015  |
| P30405                         | PPIF     | Peptidyl-prolyl cis-trans isomerase F;              | 1.15   | 0.0029  |
| P12931                         | SRC      | Proto-oncogene tyrosine-protein kinase Src          | 1.14   | 0.0016  |
| P18669                         | PGAM1    | Phosphoglycerate mutase 1                           | 1.07   | 0.081   |
| Q04759                         | PRKCQ    | Protein kinase C theta type                         | 1.10   | <0.001  |
| P14618                         | PKM2     | Pyruvate kinase PKM                                 | 1.15   | 0.0015  |
| P17252                         | PRKCA    | Protein kinase C alpha type                         | 1.10   | 0.0037  |
| O76074                         | PDE5A    | cGMP-specific 3';5'-cyclic phosphodiesterase        | 1.09   | 0.0012  |
| P67936                         | TPM4     | Tropomyosin alpha-4 chain                           | 1.10   | 0.0018  |
| P07948                         | LYNB     | Tyrosine-protein kinase Lyn; isoform B              | 1.02   | 0.0022  |
| Q15796                         | SMAD2    | Mothers against decapentaplegic homolog 2           | 1.09   | 0.0015  |
| P31946                         | YWHAB    | 14-3-3 protein family                               | 0.90   | 0.0013  |
| O15530                         | PDPK1    | 3-phosphoinositide-dependent protein kinase 1       | 1.02   | 0.0015  |
| Q9NQU5                         | PAK6     | Serine/threonine-protein kinase PAK 6               | 1.05   | 0.008   |
| Q9NYA1                         | SPHK1    | Sphingosine kinase 1                                | 1.12   | 0.002   |
| P06241                         | FYN      | Tyrosine-protein kinase Fyn                         | 1.05   | 0.0024  |
| P42680                         | TEC      | Tyrosine-protein kinase Tec                         | 0.99   | 0.0017  |
| P07948                         | LYN      | Tyrosine-protein kinase Lyn                         | 1.08   | 0.0022  |
| P42574                         | CASP3    | Caspase-3                                           | 1.03   | 0.0026  |
| O95219                         | SNX4     | Sorting nexin-4                                     | 1.06   | 0.0024  |
| P62993                         | GRB2     | Growth factor receptor-bound protein 2              | 1.005  | 0.0014  |
| Q9Y3A5                         | SBDS     | Ribosome maturation protein SBDS                    | 1.04   | 0.0013  |
| P78344                         | EIF4G2   | Eukaryotic translation initiation factor 4 gamma 2  | 0.99   | 0.00246 |
| Q13557                         | CAMK2D   | Calcium/calmodulin-dependent protein kinase         | 1.01   | 0.0014  |
| P22392                         | NME2     | Nucleoside diphosphate kinase B                     | 1.01   | 0.0013  |
| O43488                         | AKR7A2   | Aflatoxin B1 aldehyde reductase member 2            | 1.01   | 0.0016  |
| Q15056                         | EIF4H    | Eukaryotic translation initiation factor 4H         | 0.98   | 0.0075  |
| Q8N1Q1                         | CA13     | Carbonic anhydrase 13                               | 0.94   | 0.0059  |

|        |              |                                                    |      |        |
|--------|--------------|----------------------------------------------------|------|--------|
| P10809 | HSPD1        | 60 kDa heat shock protein; mitochondrial           | 0.81 | 0.010  |
| Q13554 | CAMK2B       | Calcium/calmodulin-dependent protein kinase        | 0.85 | <0.001 |
| O00299 | CLIC1        | Chloride intracellular channel protein 1           | 0.98 | 0.0016 |
| P25098 | ADRBK1       | beta-adrenergic receptor kinase 1                  | 0.96 | 0.0014 |
| P54646 | PRKAA2/B2/G1 | AMP Kinase (alpha2beta2gamma1)                     | 0.88 | 0.012  |
| Q9NP97 | DYNLRB1      | Dynein light chain roadblock-type 1                | 0.99 | 0.0035 |
| P49840 | GSK3A/B      | Glycogen synthase kinase-3 alpha/beta              | 0.94 | 0.0014 |
| P63000 | RAC1         | Ras-related C3 botulinum toxin substrate 1         | 0.94 | 0.0023 |
| P02775 | PPBP         | Connective tissue-activating peptide III           | 0.71 | 0.0942 |
| P40763 | STAT3        | Signal transducer and activator of transcription 3 | 0.91 | 0.0016 |
| P31946 | YWHAB        | 14-3-3 protein beta/alpha                          | 0.90 | 0.0013 |

---
