# Supplementary material for: Proteomic Analysis of Prehypertensive and Hypertensive Patients: Exploring the Role of the Actin Cytoskeleton
Source: MDPI journal article supplement (doi:10.3390/ijms25094896), 2024-04-30
Supplement: s1 [file s1]

**Supplementary Table S3:** Significantly differentially expressed proteins between controls, pre-hypertension, and hypertension groups. *p*-value <0.05, -0.7< log2 FC >0.7. FC: Fold Change.

| Hypertension   Control          |           |                                                      |         |                 |                 |
|---------------------------------|-----------|------------------------------------------------------|---------|-----------------|-----------------|
| Uniprot                         | Gene name | Protein name                                         | Log2 FC | <i>p</i> -value | <i>q</i> -value |
| P15498                          | VAV1      | Proto-oncogene vav                                   | 0.94    | 0.0011          | 0.07            |
| P18669                          | PGAM1     | Phosphoglycerate mutase 1                            | 0.92    | 0.0357          | 0.18            |
| P10809                          | HSPD1     | 60 kDa heat shock protein; mitochondrial             | 0.86    | 0.0002          | 0.06            |
| O15530                          | PDPK1     | 3-phosphoinositide-dependent protein kinase 1        | 0.85    | 0.0006          | 0.05            |
| Q99714                          | HSD17B10  | 3-hydroxyacyl-CoA dehydrogenase type-2               | 0.84    | 0.0006          | 0.05            |
| P16591                          | FER       | Tyrosine-protein kinase Fer                          | 0.83    | 0.0084          | 0.11            |
| O95219                          | SNX4      | Sorting nexin-4                                      | 0.79    | 0.0037          | 0.09            |
| P30405                          | PIIF      | Peptidyl-prolyl cis-trans isomerase F; mitochondrial | 0.79    | 0.0077          | 0.11            |
| Q06187                          | BTk       | Tyrosine-protein kinase BTK                          | 0.78    | 0.0102          | 0.10            |
| Q04759                          | PRKCQ     | Protein kinase C theta type                          | 0.78    | 0.0026          | 0.09            |
| P07948                          | LYNB      | Tyrosine-protein kinase Lyn; isoform B               | 0.76    | 0.0083          | 0.11            |
| P06241                          | FYN       | Tyrosine-protein kinase Fyn                          | 0.76    | 0.0085          | 0.11            |
| P07948                          | LYN       | Tyrosine-protein kinase Lyn                          | 0.74    | 0.0070          | 0.11            |
| P41240                          | CSK       | Tyrosine-protein kinase CSK                          | 0.74    | 0.0153          | 0.12            |
| Q15796                          | SMAD2     | Mothers against decapentaplegic homolog 2            | 0.73    | 0.0075          | 0.11            |
| P67936                          | TPM4      | Tropomyosin alpha-4 chain                            | 0.72    | 0.0099          | 0.11            |
| P12931                          | SRC       | Proto-oncogene tyrosine-protein kinase Src           | 0.71    | 0.0126          | 0.11            |
| P14618                          | PKM2      | Pyruvate kinase PKM                                  | 0.70    | 0.0145          | 0.12            |
| Pre-hypertension   Control      |           |                                                      |         |                 |                 |
| Uniprot                         | Gene name | Protein name                                         | Log2 FC | <i>p</i> -value | <i>q</i> -value |
| P02794                          | FTH1 FTL  | Ferritin                                             | 1.02    | 0.03            | 0.68            |
| P02792                          | PUR8      | Adenylosuccinate lyase                               | 0.74    | 0.01            | 0.77            |
| Hypertension   Pre-hypertension |           |                                                      |         |                 |                 |
| Uniprot                         | Gene      | Protein name                                         | Log2FC  | <i>p</i> -value | <i>q</i> -value |
| P16591                          | FER       | Tyrosine-protein kinase Fer                          | 1.12    | <0.001          | <0.001          |
| Q06187                          | BTk       | Tyrosine-protein kinase BTK                          | 1.03    | <0.001          | <0.001          |
| Q08752                          | PPID      | Peptidyl-prolyl cis-trans isomerase D                | 1.01    | <0.001          | 0.02            |
| P41240                          | CSK       | Tyrosine-protein kinase CSK                          | 1.00    | <0.001          | <0.001          |

|        |          |                                                                   |      |        |        |
|--------|----------|-------------------------------------------------------------------|------|--------|--------|
| P05771 | PRKCB    | Protein kinase C beta type (splice variant beta-II)               | 0.99 | <0.001 | 0.01   |
| P15498 | VAV1     | Proto-oncogene vav                                                | 0.98 | <0.001 | <0.001 |
| Q99714 | HSD17B10 | 3-hydroxyacyl-CoA dehydrogenase type-2                            | 0.96 | <0.001 | <0.001 |
| P30405 | PPIF     | Peptidyl-prolyl cis-trans isomerase F; mitochondrial              | 0.95 | <0.001 | 0.01   |
| P12931 | SRC      | Proto-oncogene tyrosine-protein kinase Src                        | 0.94 | <0.001 | <0.001 |
| P18669 | PGAM1    | Phosphoglycerate mutase 1                                         | 0.93 | <0.001 | 0.11   |
| Q04759 | PRKCQ    | Protein kinase C theta type                                       | 0.92 | <0.001 | <0.001 |
| P14618 | PKM2     | Pyruvate kinase PKM                                               | 0.92 | <0.001 | 0.01   |
| P17252 | PRKCA    | Protein kinase C alpha type                                       | 0.91 | <0.001 | 0.01   |
| O76074 | PDE5A    | cGMP-specific 3';5'-cyclic phosphodiesterase                      | 0.90 | <0.001 | <0.001 |
| P67936 | TPM4     | Tropomyosin alpha-4 chain                                         | 0.90 | <0.001 | <0.001 |
| P07948 | LYNB     | Tyrosine-protein kinase Lyn; isoform B                            | 0.90 | <0.001 | 0.01   |
| Q15796 | SMAD2    | Mothers against decapentaplegic homolog 2                         | 0.89 | <0.001 | 0.01   |
| P31946 | YWHAB    | 14-3-3 protein family                                             | 0.89 | <0.001 | <0.001 |
| O15530 | PDPK1    | 3-phosphoinositide-dependent protein kinase 1                     | 0.88 | <0.001 | 0.01   |
| Q9NQU5 | PAK6     | Serine/threonine-protein kinase PAK 6                             | 0.88 | <0.001 | 0.01   |
| Q9NYA1 | SPHK1    | Sphingosine kinase 1                                              | 0.87 | <0.001 | 0.01   |
| P06241 | FYN      | Tyrosine-protein kinase Fyn                                       | 0.86 | <0.001 | 0.01   |
| P42680 | TEC      | Tyrosine-protein kinase Tec                                       | 0.85 | <0.001 | <0.001 |
| P07948 | LYN      | Tyrosine-protein kinase Lyn                                       | 0.85 | <0.001 | 0.01   |
| P42574 | CASP3    | Caspase-3                                                         | 0.85 | <0.001 | 0.01   |
| O95219 | SNX4     | Sorting nexin-4                                                   | 0.84 | <0.001 | 0.01   |
| P62993 | GRB2     | Growth factor receptor-bound protein 2                            | 0.84 | <0.001 | <0.001 |
| Q9Y3A5 | SBDS     | Ribosome maturation protein SBDS                                  | 0.84 | <0.001 | 0.01   |
| P78344 | EIF4G2   | Eukaryotic translation initiation factor 4 gamma 2                | 0.83 | <0.001 | 0.01   |
| Q13557 | CAMK2D   | Calcium/calmodulin-dependent protein kinase type II subunit delta | 0.83 | <0.001 | 0.01   |
| P22392 | NME2     | Nucleoside diphosphate kinase B                                   | 0.82 | <0.001 | 0.01   |
| O43488 | AKR7A2   | Aflatoxin B1 aldehyde reductase member 2                          | 0.81 | <0.001 | 0.01   |
| Q15056 | EIF4H    | Eukaryotic translation initiation factor 4H                       | 0.80 | <0.001 | 0.02   |
| Q8N1Q1 | CA13     | Carbonic anhydrase 13                                             | 0.80 | <0.001 | 0.01   |
| P10809 | HSPD1    | 60 kDa heat shock protein; mitochondrial                          | 0.80 | <0.001 | 0.02   |
| Q13554 | CAMK2B   | Calcium/calmodulin-dependent protein kinase type II subunit beta  | 0.79 | <0.001 | <0.001 |
| O00299 | CLIC1    | Chloride intracellular channel protein 1                          | 0.78 | <0.001 | <0.001 |
| P25098 | ADRBK1   | beta-adrenergic receptor kinase 1                                 | 0.78 | <0.001 | <0.001 |

|        |         |                                                       |      |        |      |
|--------|---------|-------------------------------------------------------|------|--------|------|
| P54646 | PRKAA2  | AMP Kinase (alpha2beta2gamma1)                        | 0.78 | <0.001 | 0.02 |
| O43741 | PRKAB2  |                                                       |      |        |      |
| P54619 | PRKAG1  |                                                       |      |        |      |
| Q9NP97 | DYNLRB1 | Dynein light chain roadblock-type 1                   | 0.77 | <0.001 | 0.01 |
| P49840 | GSK3A   | Glycogen synthase kinase-3 alpha/beta                 | 0.75 | <0.001 | 0.01 |
| P49841 | GSK3B   |                                                       |      |        |      |
| P63000 | RAC1    |                                                       | 0.73 | <0.001 | 0.01 |
|        |         | Ras-related C3 botulinum toxin substrate 1            |      |        |      |
| P02775 | PPBP    | Connective tissue-activating peptide III              | 0.73 | <0.001 | 0.02 |
| P40763 | STAT3   | Signal transducer and activator of transcription<br>3 | 0.72 | <0.001 | 0.01 |
| P31946 | YWHAB   | 14-3-3 protein beta/alpha                             | 0.71 | <0.001 | 0.01 |
