# Supplementary material for: Proteomic Analysis of Prehypertensive and Hypertensive Patients: Exploring the Role of the Actin Cytoskeleton
Source: MDPI journal article supplement (doi:10.3390/ijms25094896), 2024-04-30
Supplement: s1 [file s1]

**Supplementary Table S7.** Demographics and clinical characteristics of the participants in the validation group. Data are represented as mean  $\pm$  standard deviation. One-way ANOVA was used to calculate the p-value.

|                                            | Controls        | Prehypertension | Hypertension     | <i>p</i> -value |
|--------------------------------------------|-----------------|-----------------|------------------|-----------------|
| Number of participants                     | 25              | 24              | 17               |                 |
| Gender (M/F)                               | 8/17            | 10/14           | 12/5             | 0.043           |
| Age                                        | 37.04 $\pm$ 6.6 | 36.13 $\pm$ 7.2 | 44.76 $\pm$ 6.7  | <0.001          |
| BMI                                        | 26.6 $\pm$ 2.4  | 26.3 $\pm$ 2.7  | 34.9 $\pm$ 3.6   | < 0.001         |
| Hemoglobin g/dl                            | 13.03 $\pm$ 1.2 | 13.6 $\pm$ 1.7  | 14.07 $\pm$ 2    | 1.29            |
| Red Blood Cell $\times 10^6/\mu\text{l}$   | 4.6 $\pm$ 0.6   | 4.9 $\pm$ 0.5   | 5.3 $\pm$ 0.6    | 0.003           |
| White Blood Cell $\times 10^3/\mu\text{l}$ | 6.5 $\pm$ 1.9   | 6.6 $\pm$ 1.4   | 7 $\pm$ 1.2      | 0.57            |
| Cholesterol Total mmol/l                   | 5.2 $\pm$ 1     | 5.2 $\pm$ 0.9   | 5.3 $\pm$ 0.9    | 0.96            |
| LDL-Cholesterol mmol/L                     | 3.4 $\pm$ 0.9   | 3.2 $\pm$ 0.7   | 3.4 $\pm$ 0.8    | 0.62            |
| HBA 1C %                                   | 5.6 $\pm$ 0.4   | 5.4 $\pm$ 0.2   | 5.9 $\pm$ 0.6    | 0.008           |
| Systolic blood pressure                    | 105.8 $\pm$ 7.3 | 128.2 $\pm$ 5.7 | 151.6 $\pm$ 16.2 | < 0.001         |
| Diastolic blood pressure                   | 71.6 $\pm$ 6.1  | 86.4 $\pm$ 5.1  | 96.5 $\pm$ 12.2  | < 0.001         |
| Albumin g/L                                | 46 $\pm$ 2.2    | 46.3 $\pm$ 3    | 44.9 $\pm$ 2.3   | 0.215           |
| ALT U/L                                    | 20.3 $\pm$ 13.7 | 20.5 $\pm$ 14.3 | 21.3 $\pm$ 10.8  | 0.22            |
| AST U/L                                    | 21.2 $\pm$ 10.6 | 20.6 $\pm$ 9.2  | 23 $\pm$ 5.6     | 0.93            |
| C-Reactive Protein mg/L                    | 4.9 $\pm$ 0.9   | 5 $\pm$ 0       | 5 $\pm$ 0        | 0.96            |

LDL: Low Density Lipoprotein. BMI: Body Mass Index. HBA1C: Hemoglobin 1C. ALT: Alanine Amino Transferase.  
AST: Aspartate Amino Transferase.
