# Supplementary material for: Proteomic Analysis of Prehypertensive and Hypertensive Patients: Exploring the Role of the Actin Cytoskeleton
Source: MDPI journal article supplement (doi:10.3390/ijms25094896), 2024-04-30
Supplement: s1 [file s1]

**Supplementary Table S6.** DAVID Functional enrichment analysis. The gene sets in each of the identified protein clusters were checked for enrichment of KEGG pathway in order to identify biological processes related to the proteins in each cluster.

| <b>Annotation Cluster 1</b> | <b>Enrichment Score: 12.27</b>                         | <b>Count</b> | <b>p-value</b> | <b>Benjamini</b> |
|-----------------------------|--------------------------------------------------------|--------------|----------------|------------------|
|                             | PI3K-Akt signaling pathway                             | 42           | 2.80E-17       | 7.50E-15         |
|                             | MAPK signaling pathway                                 | 36           | 4.10E-15       | 4.60E-13         |
|                             | Pathways in cancer                                     | 48           | 5.10E-15       | 4.60E-13         |
|                             | Rap1 signaling pathway                                 | 30           | 2.40E-14       | 1.60E-12         |
|                             | Ras signaling pathway                                  | 30           | 5.30E-13       | 2.80E-11         |
|                             | Melanoma                                               | 16           | 1.60E-10       | 3.50E-09         |
|                             | Focal adhesion                                         | 24           | 6.80E-10       | 9.60E-09         |
|                             | Regulation of actin cytoskeleton                       | 24           | 8.80E-09       | 1.10E-07         |
| <b>Annotation Cluster 2</b> | <b>Enrichment Score: 7.58</b>                          | <b>Count</b> | <b>p-value</b> | <b>Benjamini</b> |
|                             | Ras signaling pathway                                  | 30           | 5.30E-13       | 2.80E-11         |
|                             | Gastric cancer                                         | 18           | 1.40E-07       | 1.10E-06         |
|                             | Hepatocellular carcinoma                               | 14           | 2.60E-04       | 8.90E-04         |
| <b>Annotation Cluster 3</b> | <b>Enrichment Score: 5.31</b>                          | <b>Count</b> | <b>p-value</b> | <b>Benjamini</b> |
|                             | Th17 cell differentiation                              | 16           | 5.50E-08       | 5.20E-07         |
|                             | PD-L1 expression and PD-1 checkpoint pathway in cancer | 14           | 2.40E-07       | 1.90E-06         |
|                             | Th1 and Th2 cell differentiation                       | 12           | 1.50E-05       | 7.40E-05         |
|                             | Leishmaniasis                                          | 8            | 2.80E-03       | 7.10E-03         |
| <b>Annotation Cluster 4</b> | <b>Enrichment Score: 5</b>                             | <b>Count</b> | <b>p-value</b> | <b>Benjamini</b> |
|                             | Proteoglycans in cancer                                | 27           | 4.50E-12       | 2.00E-10         |
|                             | Fc epsilon RI signaling pathway                        | 17           | 5.20E-12       | 2.00E-10         |
|                             | VEGF signaling pathway                                 | 16           | 7.30E-12       | 2.40E-10         |
|                             | HIF-1 signaling pathway                                | 20           | 1.50E-11       | 4.30E-10         |
|                             | EGFR tyrosine kinase inhibitor resistance              | 17           | 6.00E-11       | 1.60E-09         |
|                             | ErbB signaling pathway                                 | 17           | 1.90E-10       | 3.90E-09         |
|                             | Chemokine signaling pathway                            | 24           | 2.70E-10       | 5.20E-09         |
|                             | Chemical carcinogenesis - receptor activation          | 25           | 3.50E-10       | 6.20E-09         |
|                             | Hepatitis B                                            | 22           | 3.90E-10       | 6.50E-09         |
|                             | Focal adhesion                                         | 24           | 6.80E-10       | 9.60E-09         |
|                             | Glioma                                                 | 15           | 3.10E-09       | 4.10E-08         |
|                             | Natural killer cell mediated cytotoxicity              | 18           | 1.10E-08       | 1.30E-07         |
|                             | Prostate cancer                                        | 16           | 1.20E-08       | 1.40E-07         |
|                             | AGE-RAGE signaling pathway in diabetic complications   | 16           | 1.90E-08       | 2.10E-07         |
|                             | Neurotrophin signaling pathway                         | 17           | 3.10E-08       | 3.30E-07         |
|                             | T cell receptor signaling pathway                      | 16           | 3.30E-08       | 3.30E-07         |
|                             | Growth hormone synthesis, secretion and action         | 17           | 3.50E-08       | 3.50E-07         |

|                                                        |    |          |          |
|--------------------------------------------------------|----|----------|----------|
| B cell receptor signaling pathway                      | 14 | 8.80E-08 | 8.10E-07 |
| Endocrine resistance                                   | 15 | 1.10E-07 | 9.60E-07 |
| PD-L1 expression and PD-1 checkpoint pathway in cancer | 14 | 2.40E-07 | 1.90E-06 |
| Human immunodeficiency virus 1 infection               | 21 | 2.40E-07 | 1.90E-06 |
| Kaposi sarcoma-associated herpesvirus infection        | 20 | 2.80E-07 | 2.10E-06 |
| Pancreatic cancer                                      | 13 | 2.90E-07 | 2.20E-06 |
| Toxoplasmosis                                          | 15 | 5.90E-07 | 4.20E-06 |
| Fc gamma R-mediated phagocytosis                       | 14 | 6.60E-07 | 4.70E-06 |
| Choline metabolism in cancer                           | 14 | 7.50E-07 | 5.10E-06 |
| Renal cell carcinoma                                   | 12 | 8.40E-07 | 5.60E-06 |
| Prolactin signaling pathway                            | 12 | 9.80E-07 | 6.30E-06 |
| Colorectal cancer                                      | 13 | 1.20E-06 | 7.40E-06 |
| Non-small cell lung cancer                             | 12 | 1.30E-06 | 8.10E-06 |
| Osteoclast differentiation                             | 15 | 3.00E-06 | 1.80E-05 |
| Breast cancer                                          | 16 | 3.20E-06 | 1.80E-05 |
| Apoptosis                                              | 15 | 6.10E-06 | 3.50E-05 |
| Sphingolipid signaling pathway                         | 14 | 6.90E-06 | 3.80E-05 |
| Thyroid hormone signaling pathway                      | 14 | 8.30E-06 | 4.40E-05 |
| Human cytomegalovirus infection                        | 19 | 1.10E-05 | 5.40E-05 |
| Platelet activation                                    | 14 | 1.10E-05 | 5.50E-05 |
| Chronic myeloid leukemia                               | 11 | 1.60E-05 | 7.70E-05 |
| Cholinergic synapse                                    | 13 | 2.10E-05 | 1.00E-04 |
| Hepatitis C                                            | 15 | 3.20E-05 | 1.40E-04 |
| Insulin signaling pathway                              | 14 | 3.20E-05 | 1.40E-04 |
| Acute myeloid leukemia                                 | 10 | 3.60E-05 | 1.50E-04 |
| Viral carcinogenesis                                   | 17 | 4.30E-05 | 1.80E-04 |
| C-type lectin receptor signaling pathway               | 12 | 4.80E-05 | 2.00E-04 |
| Central carbon metabolism in cancer                    | 10 | 5.10E-05 | 2.10E-04 |
| Platinum drug resistance                               | 10 | 7.20E-05 | 2.90E-04 |
| Phospholipase D signaling pathway                      | 14 | 7.20E-05 | 2.90E-04 |
| Relaxin signaling pathway                              | 13 | 7.90E-05 | 3.10E-04 |
| Cellular senescence                                    | 14 | 1.20E-04 | 4.70E-04 |
| Yersinia infection                                     | 13 | 1.40E-04 | 5.30E-04 |
| Diabetic cardiomyopathy                                | 16 | 1.50E-04 | 5.40E-04 |
| Estrogen signaling pathway                             | 13 | 1.50E-04 | 5.40E-04 |
| Measles                                                | 13 | 1.60E-04 | 5.60E-04 |
| Apelin signaling pathway                               | 13 | 1.60E-04 | 5.60E-04 |
| Hepatocellular carcinoma                               | 14 | 2.60E-04 | 8.90E-04 |
| Gap junction                                           | 10 | 3.10E-04 | 1.00E-03 |
| Adrenergic signaling in cardiomyocytes                 | 13 | 3.30E-04 | 1.10E-03 |
| Shigellosis                                            | 17 | 4.00E-04 | 1.30E-03 |

|                             |                                                          |              |                |                  |
|-----------------------------|----------------------------------------------------------|--------------|----------------|------------------|
|                             | Epstein-Barr virus infection                             | 15           | 4.70E-04       | 1.50E-03         |
|                             | Endometrial cancer                                       | 8            | 5.30E-04       | 1.70E-03         |
|                             | MicroRNAs in cancer                                      | 19           | 6.50E-04       | 2.00E-03         |
|                             | Progesterone-mediated oocyte maturation                  | 10           | 9.10E-04       | 2.80E-03         |
|                             | Toll-like receptor signaling pathway                     | 10           | 1.00E-03       | 3.10E-03         |
|                             | Influenza A                                              | 13           | 1.10E-03       | 3.10E-03         |
|                             | cAMP signaling pathway                                   | 15           | 1.10E-03       | 3.30E-03         |
|                             | Chemical carcinogenesis - reactive oxygen species        | 15           | 1.20E-03       | 3.50E-03         |
|                             | FoxO signaling pathway                                   | 11           | 1.50E-03       | 4.00E-03         |
|                             | TNF signaling pathway                                    | 10           | 1.80E-03       | 4.70E-03         |
|                             | Aldosterone-regulated sodium reabsorption                | 6            | 2.00E-03       | 5.30E-03         |
|                             | Autophagy - animal                                       | 11           | 2.50E-03       | 6.50E-03         |
|                             | Neutrophil extracellular trap formation                  | 13           | 2.60E-03       | 6.60E-03         |
|                             | Salmonella infection                                     | 15           | 3.50E-03       | 8.50E-03         |
|                             | Chagas disease                                           | 9            | 3.70E-03       | 8.90E-03         |
|                             | GnRH secretion                                           | 7            | 4.80E-03       | 1.20E-02         |
|                             | mTOR signaling pathway                                   | 11           | 5.30E-03       | 1.20E-02         |
|                             | Human papillomavirus infection                           | 17           | 7.90E-03       | 1.80E-02         |
|                             | Signaling pathways regulating pluripotency of stem cells | 10           | 8.90E-03       | 2.00E-02         |
|                             | cGMP-PKG signaling pathway                               | 10           | 2.30E-02       | 4.90E-02         |
|                             | Coronavirus disease - COVID-19                           | 12           | 2.90E-02       | 6.10E-02         |
|                             | Human T-cell leukemia virus 1 infection                  | 11           | 4.90E-02       | 9.60E-02         |
|                             | Spinocerebellar ataxia                                   | 7            | 1.40E-01       | 2.60E-01         |
|                             | NOD-like receptor signaling pathway                      | 8            | 1.70E-01       | 3.00E-01         |
|                             | Type II diabetes mellitus                                | 3            | 3.20E-01       | 5.00E-01         |
|                             | Herpes simplex virus 1 infection                         | 12           | 7.30E-01       | 9.30E-01         |
| <b>Annotation Cluster 5</b> | <b>Enrichment Score: 2.93</b>                            | <b>Count</b> | <b>p-value</b> | <b>Benjamini</b> |
|                             | Carbon metabolism                                        | 11           | 5.40E-04       | 1.70E-03         |
|                             | Glycolysis / Gluconeogenesis                             | 8            | 1.30E-03       | 3.60E-03         |
|                             | Biosynthesis of amino acids                              | 8            | 2.40E-03       | 6.30E-03         |
| <b>Annotation Cluster 6</b> | <b>Enrichment Score: 2.86</b>                            | <b>Count</b> | <b>p-value</b> | <b>Benjamini</b> |
|                             | HIF-1 signaling pathway                                  | 20           | 1.50E-11       | 4.30E-10         |
|                             | ErbB signaling pathway                                   | 17           | 1.90E-10       | 3.90E-09         |
|                             | Glioma                                                   | 15           | 3.10E-09       | 4.10E-08         |
|                             | Neurotrophin signaling pathway                           | 17           | 3.10E-08       | 3.30E-07         |
|                             | GnRH signaling pathway                                   | 13           | 2.70E-06       | 1.60E-05         |
|                             | Thyroid hormone signaling pathway                        | 14           | 8.30E-06       | 4.40E-05         |
|                             | Cholinergic synapse                                      | 13           | 2.10E-05       | 1.00E-04         |
|                             | Inflammatory mediator regulation of TRP channels         | 12           | 2.80E-05       | 1.30E-04         |

|                             |                                                           |              |                |                  |
|-----------------------------|-----------------------------------------------------------|--------------|----------------|------------------|
|                             | Long-term potentiation                                    | 10           | 3.60E-05       | 1.50E-04         |
|                             | Oocyte meiosis                                            | 13           | 9.10E-05       | 3.50E-04         |
|                             | Wnt signaling pathway                                     | 14           | 2.90E-04       | 9.80E-04         |
|                             | Gap junction                                              | 10           | 3.10E-04       | 1.00E-03         |
|                             | Adrenergic signaling in cardiomyocytes                    | 13           | 3.30E-04       | 1.10E-03         |
|                             | Endometrial cancer                                        | 8            | 5.30E-04       | 1.70E-03         |
|                             | cAMP signaling pathway                                    | 15           | 1.10E-03       | 3.30E-03         |
|                             | Glucagon signaling pathway                                | 10           | 1.30E-03       | 3.60E-03         |
|                             | Oxytocin signaling pathway                                | 12           | 1.50E-03       | 4.00E-03         |
|                             | Dopaminergic synapse                                      | 11           | 1.60E-03       | 4.20E-03         |
|                             | Aldosterone-regulated sodium reabsorption                 | 6            | 2.00E-03       | 5.30E-03         |
|                             | GnRH secretion                                            | 7            | 4.80E-03       | 1.20E-02         |
|                             | Amphetamine addiction                                     | 7            | 7.00E-03       | 1.60E-02         |
|                             | Circadian entrainment                                     | 8            | 1.00E-02       | 2.30E-02         |
|                             | Melanogenesis                                             | 8            | 1.20E-02       | 2.80E-02         |
|                             | Aldosterone synthesis and secretion                       | 7            | 3.40E-02       | 7.10E-02         |
|                             | Gastric acid secretion                                    | 6            | 4.00E-02       | 8.00E-02         |
|                             | Long-term depression                                      | 5            | 6.10E-02       | 1.20E-01         |
|                             | Insulin secretion                                         | 6            | 6.20E-02       | 1.20E-01         |
|                             | Cushing syndrome                                          | 8            | 9.00E-02       | 1.70E-01         |
|                             | Amoebiasis                                                | 6            | 1.10E-01       | 2.00E-01         |
|                             | Endocrine and other factor-regulated calcium reabsorption | 4            | 1.40E-01       | 2.60E-01         |
|                             | Glutamatergic synapse                                     | 6            | 1.50E-01       | 2.70E-01         |
|                             | Serotonergic synapse                                      | 6            | 1.60E-01       | 2.80E-01         |
|                             | Morphine addiction                                        | 5            | 1.90E-01       | 3.20E-01         |
|                             | Vascular smooth muscle contraction                        | 6            | 2.40E-01       | 3.90E-01         |
|                             | Parathyroid hormone synthesis, secretion and action       | 5            | 2.70E-01       | 4.30E-01         |
|                             | Retrograde endocannabinoid signaling                      | 6            | 3.00E-01       | 4.80E-01         |
|                             | GABAergic synapse                                         | 4            | 3.80E-01       | 5.80E-01         |
|                             | Thyroid hormone synthesis                                 | 3            | 5.60E-01       | 7.90E-01         |
|                             | Salivary secretion                                        | 3            | 6.70E-01       | 9.10E-01         |
|                             | Olfactory transduction                                    | 5            | 1.00E+00       | 1.00E+00         |
| <b>Annotation Cluster 7</b> | <b>Enrichment Score: 1.98</b>                             | <b>Count</b> | <b>p-value</b> | <b>Benjamini</b> |
|                             | Pathways of neurodegeneration - multiple diseases         | 26           | 2.80E-04       | 9.40E-04         |
|                             | Prion disease                                             | 15           | 7.70E-03       | 1.80E-02         |
|                             | Amyotrophic lateral sclerosis                             | 10           | 5.50E-01       | 7.90E-01         |
| <b>Annotation Cluster 8</b> | <b>Enrichment Score: 1.66</b>                             | <b>Count</b> | <b>p-value</b> | <b>Benjamini</b> |
|                             | Insulin resistance                                        | 10           | 1.40E-03       | 3.80E-03         |
|                             | FoxO signaling pathway                                    | 11           | 1.50E-03       | 4.00E-03         |
|                             | TNF signaling pathway                                     | 10           | 1.80E-03       | 4.70E-03         |

|                             |                                                 |              |                |                  |
|-----------------------------|-------------------------------------------------|--------------|----------------|------------------|
|                             | Autophagy - animal                              | 11           | 2.50E-03       | 6.50E-03         |
|                             | GnRH secretion                                  | 7            | 4.80E-03       | 1.20E-02         |
|                             | mTOR signaling pathway                          | 11           | 5.30E-03       | 1.20E-02         |
|                             | Longevity regulating pathway - multiple species | 6            | 1.80E-02       | 4.00E-02         |
|                             | Adipocytokine signaling pathway                 | 6            | 2.80E-02       | 5.90E-02         |
|                             | Non-alcoholic fatty liver disease               | 9            | 3.80E-02       | 7.80E-02         |
|                             | Carbohydrate digestion and absorption           | 4            | 1.10E-01       | 2.00E-01         |
|                             | Regulation of lipolysis in adipocytes           | 4            | 1.70E-01       | 3.00E-01         |
|                             | Longevity regulating pathway                    | 5            | 1.80E-01       | 3.10E-01         |
|                             | AMPK signaling pathway                          | 6            | 1.80E-01       | 3.10E-01         |
|                             | Small cell lung cancer                          | 5            | 1.90E-01       | 3.30E-01         |
|                             | Alcoholic liver disease                         | 6            | 2.80E-01       | 4.40E-01         |
| <b>Annotation Cluster 9</b> | <b>Enrichment Score: 0.58</b>                   | <b>Count</b> | <b>p-value</b> | <b>Benjamini</b> |
|                             | Purine metabolism                               | 7            | 9.70E-02       | 1.90E-01         |
|                             | Drug metabolism - other enzymes                 | 4            | 3.20E-01       | 5.00E-01         |
|                             | Nucleotide metabolism                           | 4            | 3.50E-01       | 5.40E-01         |
|                             | Pyrimidine metabolism                           | 3            | 4.20E-01       | 6.30E-01         |
