# Supplementary material for: Proteomic Analysis of Prehypertensive and Hypertensive Patients: Exploring the Role of the Actin Cytoskeleton
Source: MDPI journal article supplement (doi:10.3390/ijms25094896), 2024-04-30
Supplement: s1 [file s1]

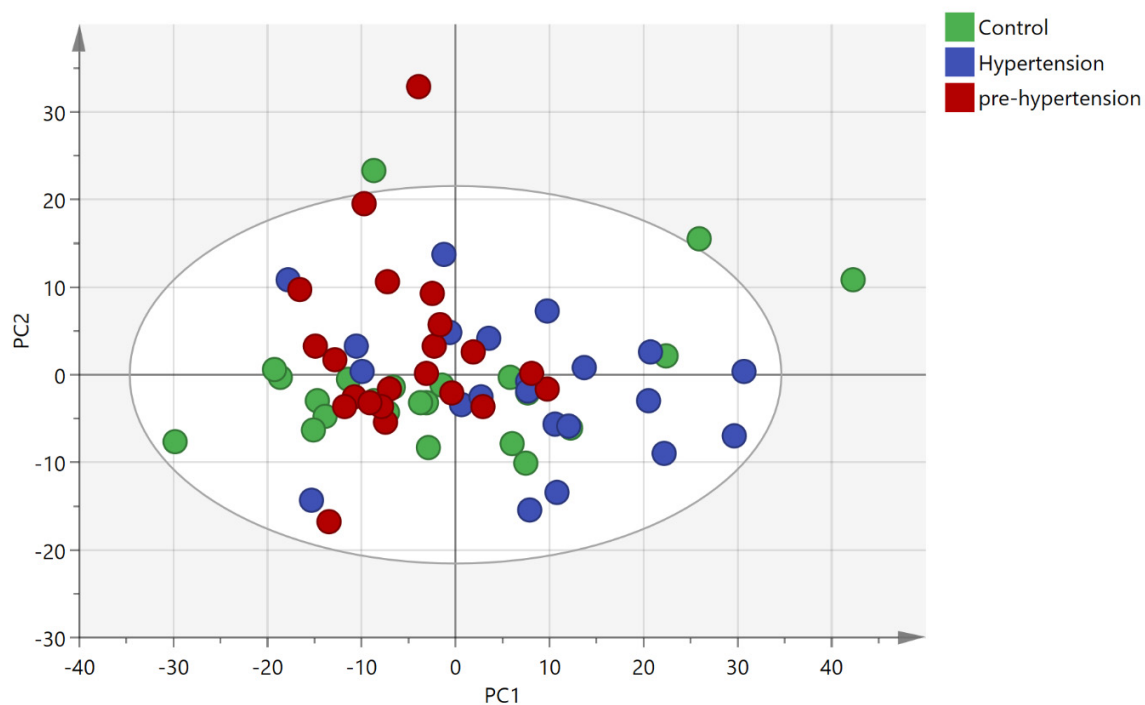

**Figure S1.** Principle Component Analysis (PCA) of the participants in the control, prehypertension and hypertension groups.

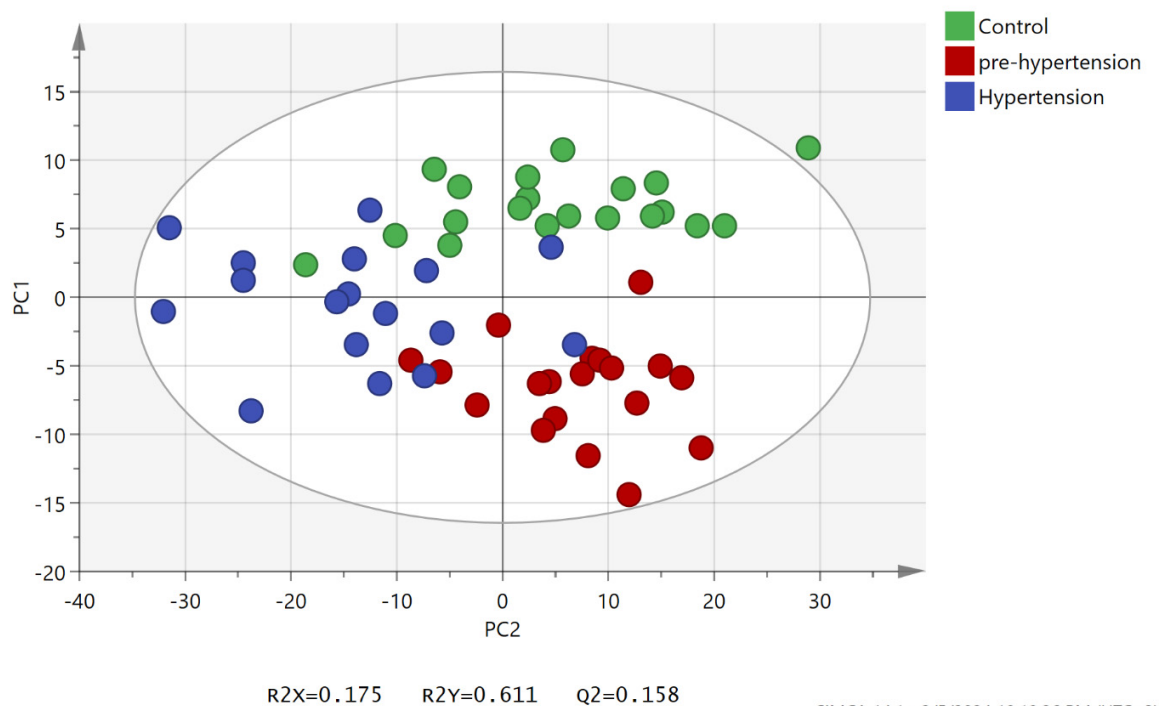

SIMCA 14.1 - 2/5/2024 10:19:26 PM (UTC+3)

**Figure S2.** Orthogonal partial least squares discriminant analysis (OPLS-DA) scatter plot excluding patients receiving anti-hypertensive treatment from the study groups.
