# Supplementary material for: Proteomic Analysis of Prehypertensive and Hypertensive Patients: Exploring the Role of the Actin Cytoskeleton
Source: MDPI journal article supplement (doi:10.3390/ijms25094896), 2024-04-30
Supplement: s1 [file s1]

**Supplementary Table S5.** Sensitivity and specificity based on ROC analysis of all differentially expressed proteins between the groups.

| protein           | Hypertension Control |              |         | Pre-hypertension Control |              |         | Hypertension  Pre-hypertension |              |         |
|-------------------|----------------------|--------------|---------|--------------------------|--------------|---------|--------------------------------|--------------|---------|
|                   | AUC                  | 95% CI       | p-value | AUC                      | 95% CI       | p-value | AUC                            | 95% CI       | p-value |
| <b>Ferritin</b>   | 0.74                 | 0.58 to 0.90 | 0.010   | 0.833                    | 0.69 to 0.96 | 0.00    | 0.55                           | 0.38 to 0.73 | 0.527   |
| <b>PUR8</b>       | 0.52                 | 0.32 to 0.72 | 0.792   | 0.8                      | 0.64 to 0.95 | 0.001   | 0.61                           | 0.43 to 0.80 | 0.203   |
| <b>AMPK</b>       | 0.76                 | 0.61 to 0.91 | 0.006   | 0.628                    | 0.43 to 0.82 | 0.19    | 0.70                           | 0.54 to 0.87 | 0.022   |
| <b>EIF4H</b>      | 0.68                 | 0.52 to 0.84 | 0.038   | 0.58                     | 0.40 to 0.75 | 0.37    | 0.73                           | 0.58 to 0.88 | 0.008   |
| <b>DYNLRB1</b>    | 0.65                 | 0.48 to 0.81 | 0.096   | 0.62                     | 0.44 to 0.79 | 0.18    | 0.75                           | 0.61 to 0.90 | 0.003   |
| <b>PPID</b>       | 0.66                 | 0.50 to 0.83 | 0.062   | 0.59                     | 0.41 to 0.77 | 0.30    | 0.75                           | 0.61 to 0.90 | 0.003   |
| <b>Cas-3</b>      | 0.7                  | 0.54 to 0.85 | 0.026   | 0.60                     | 0.43 to 0.78 | 0.24    | 0.77                           | 0.63 to 0.91 | 0.002   |
| <b>CA13</b>       | 0.73                 | 0.58 to 0.89 | 0.009   | 0.59                     | 0.41 to 0.77 | 0.30    | 0.77                           | 0.63 to 0.91 | 0.002   |
| <b>PRKCA</b>      | 0.71                 | 0.55 to 0.87 | 0.016   | 0.57                     | 0.39 to 0.75 | 0.41    | 0.77                           | 0.63 to 0.92 | 0.001   |
| <b>PGAM1</b>      | 0.74                 | 0.59 to 0.89 | 0.008   | 0.53                     | 0.34 to 0.73 | 0.70    | 0.78                           | 0.63 to 0.92 | 0.002   |
| <b>PAK6</b>       | 0.73                 | 0.58 to 0.88 | 0.010   | 0.56                     | 0.38 to 0.75 | 0.45    | 0.78                           | 0.63 to 0.92 | 0.001   |
| <b>SPHK1</b>      | 0.71                 | 0.55 to 0.86 | 0.017   | 0.58                     | 0.40 to 0.76 | 0.34    | 0.78                           | 0.64 to 0.92 | 0.001   |
| <b>HSP 60</b>     | 0.86                 | 0.75 to 0.98 | <0.001  | 0.51                     | 0.32 to 0.70 | 0.88    | 0.78                           | 0.64 to 0.92 | 0.001   |
| <b>SNX4</b>       | 0.73                 | 0.58 to 0.89 | <0.001  | 0.52                     | 0.34 to 0.71 | 0.77    | 0.78                           | 0.64 to 0.93 | 0.001   |
| <b>SMAD2</b>      | 0.738                | 0.58 to 0.89 | 0.0082  | 0.561                    | 0.38 to 0.74 | 0.497   | 0.792                          | 0.64 to 0.93 | 0.001   |
| <b>EIF4G2</b>     | 0.731                | 0.57 to 0.88 | 0.0102  | 0.573                    | 0.39 to 0.75 | 0.418   | 0.796                          | 0.65 to 0.93 | 0.0009  |
| <b>AKR7A2</b>     | 0.751                | 0.60 to 0.90 | 0.0065  | 0.533                    | 0.34 to 0.72 | 0.714   | 0.799                          | 0.65 to 0.93 | 0.0009  |
| <b>CAMK2D</b>     | 0.720                | 0.56 to 0.87 | 0.0146  | 0.63                     | 0.45 to 0.80 | 0.159   | 0.802                          | 0.65 to 0.94 | 0.0008  |
| <b>GSK-3A/B</b>   | 0.690                | 0.52 to 0.85 | 0.0344  | 0.609                    | 0.42 to 0.79 | 0.230   | 0.803                          | 0.66 to 0.94 | 0.0007  |
| <b>LYN</b>        | 0.727                | 0.57 to 0.87 | 0.0118  | 0.569                    | 0.38 to 0.75 | 0.449   | 0.803                          | 0.66 to 0.93 | 0.0007  |
| <b>PPIF</b>       | 0.75                 | 0.60 to 0.89 | 0.0056  | 0.566                    | 0.38 to 0.74 | 0.465   | 0.803                          | 0.67 to 0.93 | 0.0007  |
| <b>CTAP-III</b>   | 0.693                | 0.53 to 0.85 | 0.0323  | 0.612                    | 0.43 to 0.79 | 0.223   | 0.804                          | 0.67 to 0.93 | 0.0007  |
| <b>LYNB</b>       | 0.731                | 0.58 to 0.88 | 0.0102  | 0.576                    | 0.39 to 0.75 | 0.403   | 0.805                          | 0.67 to 0.93 | 0.0006  |
| <b>GRB2</b>       | 0.734                | 0.58 to 0.88 | 0.0095  | 0.6                      | 0.42 to 0.77 | 0.273   | 0.811                          | 0.68 to 0.94 | 0.0005  |
| <b>NME2</b>       | 0.752                | 0.60 to 0.90 | 0.0052  | 0.588                    | 0.40 to 0.76 | 0.334   | 0.813                          | 0.67 to 0.94 | 0.0004  |
| <b>RAC1</b>       | 0.684                | 0.52 to 0.84 | 0.0414  | 0.609                    | 0.42 to 0.79 | 0.230   | 0.816                          | 0.68 to 0.94 | 0.0004  |
| <b>STAT3</b>      | 0.65                 | 0.47 to 0.82 | 0.1046  | 0.591                    | 0.40 to 0.77 | 0.323   | 0.817                          | 0.67 to 0.95 | 0.0006  |
| <b>CSK</b>        | 0.715                | 0.55 to 0.87 | 0.0167  | 0.621                    | 0.44 to 0.80 | 0.183   | 0.818                          | 0.68 to 0.94 | 0.0004  |
| <b>ADRBK1</b>     | 0.75                 | 0.60 to 0.89 | 0.0056  | 0.578                    | 0.39 to 0.76 | 0.389   | 0.818                          | 0.68 to 0.95 | 0.0004  |
| <b>VAV</b>        | 0.786                | 0.64 to 0.92 | 0.0015  | 0.521                    | 0.33 to 0.70 | 0.814   | 0.820                          | 0.68 to 0.95 | 0.0003  |
| <b>14-3-3 A/B</b> | 0.706                | 0.54 to 0.86 | 0.0219  | 0.59                     | 0.40 to 0.77 | 0.330   | 0.820                          | 0.68 to 0.95 | 0.0004  |
| <b>TPM4</b>       | 0.715                | 0.56 to 0.87 | 0.0167  | 0.547                    | 0.35 to 0.73 | 0.601   | 0.824                          | 0.69 to 0.95 | 0.0003  |
| <b>FER</b>        | 0.756                | 0.60 to 0.90 | 0.0052  | 0.618                    | 0.43 to 0.79 | 0.206   | 0.825                          | 0.68 to 0.96 | 0.0003  |
| <b>SRCN1</b>      | 0.729                | 0.57 to 0.88 | 0.011   | 0.604                    | 0.42 to 0.78 | 0.251   | 0.833                          | 0.70 to 0.96 | 0.0002  |
| <b>PKM2</b>       | 0.713                | 0.55 to 0.86 | 0.0179  | 0.62                     | 0.43 to 0.80 | 0.194   | 0.834                          | 0.70 to 0.96 | 0.0002  |
| <b>TEC</b>        | 0.743                | 0.59 to 0.89 | 0.007   | 0.6                      | 0.42 to 0.77 | 0.273   | 0.835                          | 0.70 to 0.96 | 0.0002  |
| <b>PDE5A</b>      | 0.711                | 0.55 to 0.86 | 0.0192  | 0.607                    | 0.42 to 0.78 | 0.240   | 0.837                          | 0.71 to 0.96 | 0.0002  |

|                                      |       |              |        |       |              |       |       |              |         |
|--------------------------------------|-------|--------------|--------|-------|--------------|-------|-------|--------------|---------|
| <b>14-3-3<br/>protein<br/>family</b> | 0.746 | 0.59 to 0.89 | 0.0071 | 0.578 | 0.39 to 0.76 | 0.393 | 0.837 | 0.71 to 0.96 | 0.0002  |
| <b>CLIC1</b>                         | 0.690 | 0.52 to 0.85 | 0.0344 | 0.614 | 0.43 to 0.79 | 0.210 | 0.839 | 0.71 to 0.96 | 0.0001  |
| <b>KPCT</b>                          | 0.769 | 0.62 to 0.91 | 0.0032 | 0.602 | 0.41 to 0.79 | 0.267 | 0.845 | 0.71 to 0.97 | 0.0002  |
| <b>PDPk1</b>                         | 0.779 | 0.64 to 0.91 | 0.002  | 0.578 | 0.39 to 0.76 | 0.399 | 0.846 | 0.72 to 0.96 | 0.0002  |
| <b>BTK</b>                           | 0.731 | 0.57 to 0.88 | 0.0102 | 0.63  | 0.44 to 0.81 | 0.159 | 0.847 | 0.72 to 0.97 | 0.0001  |
| <b>CAMK2B</b>                        | 0.787 | 0.63 to 0.93 | 0.0017 | 0.663 | 0.49 to 0.83 | 0.081 | 0.854 | 0.71 to 0.98 | <0.0001 |
| <b>SBDS</b>                          | 0.747 | 0.59 to 0.89 | 0.0067 | 0.588 | 0.40 to 0.76 | 0.334 | 0.859 | 0.74 to 0.97 | <0.0001 |
| <b>ERAB</b>                          | 0.778 | 0.63 to 0.91 | 0.0023 | 0.602 | 0.42 to 0.78 | 0.267 | 0.866 | 0.76 to 0.97 | <0.0001 |
