# Supplementary material for: Proteomic Analysis of Prehypertensive and Hypertensive Patients: Exploring the Role of the Actin Cytoskeleton
Source: MDPI journal article supplement (doi:10.3390/ijms25094896), 2024-04-30
Supplement: s1 [file s1]

**Supplementary Table S2.** ANOVA test results showing significantly different proteins between the three groups ( $q$ -value<0.05). Proteins are represented in terms of their uniprot and gene names.

| Uniprot | Gene      | $p$ -value | $q$ -value | Uniprot | Gene     | $p$ -value | $q$ -value |
|---------|-----------|------------|------------|---------|----------|------------|------------|
| P15531  | NME1      | <0.001     | <0.001     | P09326  | CD48     | 0.0018     | 0.019      |
| P18031  | PTPN1     | <0.001     | <0.001     | P42574  | CASP3    | 0.0019     | 0.019      |
| Q13554  | CAMK2B    | <0.001     | <0.001     | P55075  | FGF8     | 0.0020     | 0.020      |
| Q9UQM7  | CAMK2A    | <0.001     | <0.001     | Q9UNP9  | PPIE     | 0.0020     | 0.020      |
| P49336  | CDK8 CCNC | <0.001     | 0.0013     | Q01469  | FABP5    | 0.0020     | 0.020      |
| P24863  |           |            |            |         |          |            |            |
| Q99714  | HSD17B10  | <0.001     | 0.0016     | P31946  | YWHAB    | 0.0021     | 0.020      |
| Q16543  | CDC37     | <0.001     | 0.0034     | Q9NP79  | VTA1     | 0.0021     | 0.020      |
| P42226  | STAT6     | <0.001     | 0.0049     | Q9Y3C8  | UFC1     | 0.0021     | 0.020      |
| Q04759  | PRKCQ     | <0.001     | 0.005      | P13693  | TPT1     | 0.0022     | 0.021      |
| P41743  | PRKCI     | <0.001     | 0.0054     | Q9UJU6  | DBNL     | 0.0023     | 0.021      |
| P29353  | SHC1      | <0.001     | 0.0055     | P60763  | RAC3     | 0.0024     | 0.021      |
| P15498  | VAV1      | <0.001     | 0.0056     | P07384  | CAPN1    | 0.0023     | 0.021      |
|         |           |            |            | P04632  | CAPNS1   |            |            |
| O15530  | PDPK1     | <0.001     | 0.0058     | Q9UBC2  | EPS15L1  | 0.0025     | 0.023      |
| P42680  | TEC       | <0.001     | 0.006      | Q9NYA1  | SPHK1    | 0.0026     | 0.023      |
| P30419  | NMT1      | <0.001     | 0.0096     | Q16644  | MAPKAPK3 | 0.0027     | 0.024      |
| P06744  | GPI       | <0.001     | 0.0099     | Q08629  | SPOCK1   | 0.0027     | 0.024      |
| P30101  | PDIA3     | <0.001     | 0.0099     | O00533  | CHL1     | 0.0028     | 0.024      |
| Q07817  | BCL2L1    | <0.001     | 0.01       | Q9UJ70  | NAGK     | 0.0029     | 0.025      |
| P29350  | PTPN6     | <0.001     | 0.010      | Q96GD0  | PDXP     | 0.0029     | 0.025      |
| P31749  | AKT1 AKT2 | <0.001     | 0.011      | P05771  | PRKCB    | 0.0030     | 0.025      |
| P31751  | AKT3      |            |            |         |          |            |            |
| Q9Y243  |           |            |            |         |          |            |            |
| P09936  | UCHL1     | <0.001     | 0.011      | Q8TEU8  | WFIKKN2  | 0.0032     | 0.026      |
| P16591  | FER       | <0.001     | 0.011      | Q8N1Q1  | CA13     | 0.0032     | 0.026      |
| P25098  | ADRBK1    | <0.001     | 0.012      | P56211  | ARPP19   | 0.0032     | 0.026      |
| P62993  | GRB2      | <0.001     | 0.0125     | P17252  | PRKCA    | 0.0033     | 0.027      |
| P31946  | YWHAB     | <0.001     | 0.013      | P54646  | PRKAA2   | 0.0036     | 0.027      |
|         |           |            |            | O43741  | PRKAB2   |            |            |
|         |           |            |            | P54619  | PRKAG1   |            |            |
| Q13557  | CAMK2D    | <0.001     | 0.013      | P63000  | RAC1     | 0.0036     | 0.028      |
| P42336  | PIK3CA    | <0.001     | 0.013      | P62937  | PPIA     | 0.0035     | 0.028      |
| P27986  | PIK3R1    |            |            |         |          |            |            |
| Q15796  | SMAD2     | <0.001     | 0.013      | Q14974  | KPNB1    | 0.0035     | 0.028      |
| Q06187  | BTK       | <0.001     | 0.013      | P05112  | IL4      | 0.0035     | 0.028      |
| P07900  | HSP90AA1  | <0.001     | 0.013      | Q08431  | MFGE8    | 0.0035     | 0.028      |
| P08238  | HSP90AB1  |            |            |         |          |            |            |
| O00299  | CLIC1     | <0.001     | 0.014      | P31785  | IL2RG    | 0.0038     | 0.028      |
| O43323  | DHH       | <0.001     | 0.014      | P63104  | YWHAZ    | 0.0037     | 0.028      |
| O95219  | SNX4      | <0.001     | 0.014      | Q08209  | PPP3CA   | 0.0038     | 0.028      |
|         |           |            |            | P63098  | PPP3R1   |            |            |

|              |             |        |       |        |          |        |       |
|--------------|-------------|--------|-------|--------|----------|--------|-------|
| P10809       | HSPD1       | <0.001 | 0.014 | Q15465 | SHH      | 0.0039 | 0.029 |
| Q8N5S9       | CAMKK1      | <0.001 | 0.015 | P55010 | EIF5     | 0.0042 | 0.031 |
| P12931       | SRC         | <0.001 | 0.016 | P84022 | SMAD3    | 0.0043 | 0.031 |
| Q9P126       | CLEC1B      | <0.001 | 0.016 | P60900 | PSMA6    | 0.0045 | 0.032 |
| Q9Y3A5       | SBDS        | <0.001 | 0.016 | P46108 | CRK      | 0.0045 | 0.032 |
| P01282       | VIP         | <0.001 | 0.016 | P54920 | NAPA     | 0.0045 | 0.032 |
| Q06323       | PSME1       | <0.001 | 0.016 | Q15056 | EIF4H    | 0.0048 | 0.034 |
| P41240       | CSK         | <0.001 | 0.016 | Q8NCW0 | KREMEN2  | 0.0048 | 0.035 |
| Q7Z3B1       | NEGR1       | <0.001 | 0.017 | Q16548 | BCL2A1   | 0.0048 | 0.035 |
| P08238       | HSP90AB1    | <0.001 | 0.017 | P37802 | TAGLN2   | 0.0052 | 0.036 |
| Q16539       | MAPK14      | <0.001 | 0.017 | P50579 | METAP2   | 0.0052 | 0.037 |
| P36888       | FLT3        | <0.001 | 0.017 | Q92934 | BAD      | 0.0055 | 0.037 |
| P22392       | NME2        | <0.001 | 0.017 | Q01973 | ROR1     | 0.0055 | 0.038 |
| P67936       | TPM4        | <0.001 | 0.017 | P26992 | CNTFR    | 0.0054 | 0.038 |
| P46531       | NOTCH1      | <0.001 | 0.017 | Q06830 | PRDX1    | 0.0054 | 0.038 |
| P06241       | FYN         | <0.001 | 0.017 | P12268 | IMPDH2   | 0.0056 | 0.038 |
| P05121       | SERPINE1    | <0.001 | 0.017 | Q9NQUS | PAK6     | 0.0054 | 0.038 |
| P07948       | LYN         | <0.001 | 0.017 | P60174 | TPI1     | 0.0057 | 0.038 |
| O76074       | PDE5A       | <0.001 | 0.017 | Q9NP97 | DYNLRB1  | 0.0058 | 0.039 |
| P31751       | AKT2        | <0.001 | 0.017 | O95445 | APOM     | 0.0059 | 0.039 |
| Q9UK53       | ING1        | <0.001 | 0.017 | P08253 | MMP2     | 0.0060 | 0.040 |
| P27361       | MAPK3       | <0.001 | 0.017 | P61960 | UFM1     | 0.0060 | 0.040 |
| P07948       | LYN         | <0.001 | 0.017 | P30086 | PEBP1    | 0.0063 | 0.041 |
| P56199;P0556 | ITGA1 ITGB1 | <0.001 | 0.017 | P49137 | MAPKAPK2 | 0.0064 | 0.041 |
| Q9HCR9       | PDE11A      | <0.001 | 0.017 | P63279 | UBE2I    | 0.0064 | 0.041 |
| O43488       | AKR7A2      | <0.001 | 0.017 | P0CG37 | CFC1     | 0.0065 | 0.041 |
| P48736       | PIK3CG      | <0.001 | 0.017 | P26038 | MSN      | 0.0066 | 0.042 |
| P25685       | DNAJB1      | <0.001 | 0.017 | P17181 | IFNAR1   | 0.0065 | 0.042 |
| O43320       | FGF16       | <0.001 | 0.017 | O75556 | SCGB2A1  | 0.0067 | 0.042 |
| P14618       | PKM2        | <0.001 | 0.017 | P21217 | FUT3     | 0.0067 | 0.042 |
| Q9HCN6       | GP6         | <0.001 | 0.017 | P29401 | TKT      | 0.0075 | 0.045 |
| Q9NQW7       | XPNPEP1     | <0.001 | 0.017 | P55854 | SUMO3    | 0.0073 | 0.046 |
| P07195       | LDHB        | <0.001 | 0.017 | Q9UMR2 | DDX19B   | 0.0073 | 0.046 |
| Q9Y5N5       | N6AMT1      | 0.0016 | 0.017 | P63208 | SKP1     | 0.0074 | 0.046 |
| P40763       | STAT3       | 0.0016 | 0.018 | P30041 | PRDX6    | 0.0077 | 0.047 |
| P51452       | DUSP3       | 0.0012 | 0.018 | P08581 | MET      | 0.0077 | 0.047 |
| P40925       | MDH1        | 0.0016 | 0.018 | Q9BY41 | HDAC8    | 0.0078 | 0.047 |
| P78344       | EIF4G2      | 0.0011 | 0.018 | Q03167 | TGFBR3   | 0.0080 | 0.048 |
| P30405       | PPIF        | 0.0017 | 0.018 | P20160 | AZU1     | 0.0083 | 0.049 |
| Q9UNZ2       | NSFL1C      | 0.0011 | 0.018 | Q86YT9 | AMICA1   | 0.0084 | 0.049 |
| P28482       | MAPK1       | 0.0017 | 0.018 | P00797 | REN      | 0.0085 | 0.049 |
| P04406       | GAPDH       | 0.0019 | 0.019 | P08684 | CYP3A4   | 0.0084 | 0.049 |

|        |             |        |       |        |         |        |        |
|--------|-------------|--------|-------|--------|---------|--------|--------|
| P49840 | GSK3A GSK3B | 0.0019 | 0.019 | P37840 | SNCA    | 0.0085 | 0.049  |
| P49841 |             |        |       |        |         |        |        |
| O00170 | AIP         | 0.0019 | 0.019 | O75173 | ADAMTS4 | 0.0086 | 0.0495 |
| P42224 | STAT1       | 0.0018 | 0.019 |        |         |        |        |
