# Supplementary material for: Proteomic Analysis of Prehypertensive and Hypertensive Patients: Exploring the Role of the Actin Cytoskeleton
Source: MDPI journal article supplement (doi:10.3390/ijms25094896), 2024-04-30
Supplement: s1 [file s1]

**Supplementary Table S1.** Post hoc analysis conducted after significant ANOVA/Chi square test results for the participants' clinical characteristics.

|                               | <b>Control</b> | <b>Prehypertension</b> | <b>Hypertension</b> | <b>p-value</b> | <b>C vs<br/>Pre</b> | <b>C vs<br/>Hyp</b> | <b>Pre vs<br/>Hyp</b> |
|-------------------------------|----------------|------------------------|---------------------|----------------|---------------------|---------------------|-----------------------|
| <b>Age</b>                    | 45.2           | 51.7                   | 50.2                | 0.003          | <0.001              | 0.077               | 0.871                 |
| <b>Hypertension treatment</b> |                |                        |                     |                |                     |                     |                       |
| Tablets                       | 0              | 2                      | 5                   | 0.043          | 0.23                | 0.021               | 0.41                  |
| DASH                          | 0              | 2                      | 5                   | 0.043          | 0.23                | 0.021               | 0.41                  |

C: Control; Pre: Prehypertension; Hyp: Hypertension
