# Supplementary material for: Proteomic Analysis of Prehypertensive and Hypertensive Patients: Exploring the Role of the Actin Cytoskeleton
Source: Int J Mol Sci. 2024 Apr 30;25(9):4896. doi: 10.3390/ijms25094896 (PMC11084483; doi:10.3390/ijms25094896)
Supplement: Supplementary file 1 [file ijms-25-04896-s001.zip › Supplementary File S1. proteomics and clinical profile data of the validation and discovery cohorts.xlsx]

## Sheet: Discovery _Clinical Profile
Cases/Controls	Gender	Age	Hemoglobin g/dl	Red Blood Cell x10^6/ul	White Blood Cellx10^3/ul	Albumin g/L	ALT(U/L )	AST (U/L)	Cholesterol Total mmol/l	HDL-Cholesterol mmol/L	LDL-Cholesterol Calc mmol/L	Triglyceride mmol/L	HBA 1C %	C-Reactive Protein mg/L	Average systolic blood pressure	Average diastolic blood pressure	BMI
Control 1	Female	53	13.4	5	3.8	48	19	18	5.4	1.82	3	0.67	5.5	5	87	53	17.02
Control 2	Female	45	12.4	4.8	4.7	44	20	21	5.5	1.72	4	0.53	5.5	5	103	68	22.7
Control 3	Female	41	12.3	4.4	4.5	47	20	17	4.54	0.99	3	0.6	5.2	5	112	75	26.16
Control 4	Female	54	13.4	4.1	4.8	47	21	20	4.74	2.28	2	0.83	5.5	5	111	64	26.74
Control 5	Female	41	11.5	4.1	6.5	44	11	15	5.28	2.46	2	1.02	6	5	88	60	29.13
Control 6	Female	49	11.7	4.4	5.5	46	15	14	5.04	2.04	3	0.7	5.2	5	115	67	25.17
Control 7	Female	43	12.5	4.4	6.3	45	24	24	4.4	1.7	2	0.66	5	6	99	67	28.16
Control 8	Female	40	10.8	4.7	6.1	48	7	14	5.21	1.51	3	0.83	5.6	5	95	67	20.7
Control 9	Female	43	12.8	4.6	5.7	47	19	16	4.73	1.75	3	0.87	5.4	.	106	67	22.22
Control 10	Female	54	12.3	4.4	7.2	45	28	27	5.68	1.59	4	1.12	5.9	.	105	67	28.51
Control 11	Female	44	12.1	4	5.9	46	14	19	5.77	1.32	4	1.16	5.6	5	92	65	26.52
Control 12	Male	42	14.3	4.6	6.4	46	71	25	4.26	0.96	3	1.26	5	5	106	68	27.22
Control 13	Male	45	14.5	5.1	5.4	46	21	19	5.72	1.07	4	1.09	5.3	5	115	77	26.12
Control 14	Male	43	14.6	5	7.6	47	16	18	5.04	1.57	3	0.56	5.4	5	109	68	29.58
Control 15	Male	45	13.5	6.1	7.8	47	18	24	5.3	1.56	3	0.83	5.6	5	108	78	22.95
Control 16	Male	45	11.5	5.7	6.9	47	28	22	3.69	1.21	2	0.83	5.1	5	108	66	27.15
Control 17	Male	44	14.7	5.1	5.3	44	35	34	3.6	1.81	1	0.78	5.7	5	119	67	28.32
Control 18	Male	42	13.4	6	7.7	46	16	19	4.75	1.33	2.77	1.42	5.9	5	110	73	29.6
Control 19	Male	44	14.7	5.1	5.4	44	30	15	4.92	0.91	2.97	2.27	5.8	5	99	61	27.66
Control 20	Male	47	14.7	4.3	5	45	21	22	5	1.27	2.74	2.2	5.2	5	105	73	25.28
Control 21	Male	42	14.8	5	4.4	45	32	18	5.5	1.39	3.3	1.8	4.7	5	112	77	29.17
Control 22	Male	52	14.9	4.6	5.9	44	29	25	5.8	1.4	3.59	1.8	5.3	5	106	75	27.37
Control 23	Male	42	15.1	5.6	9.6	47	105	42	6.1	1.35	4.03	1.6	6.1	<5	107	73	23.88
pre-hypertension 1	Female	62	12.4	4.2	6.7	46	21	15	5.28	1.99	3	1	4.9	5	137	82	26.92
pre-hypertension 2	Female	60	12.5	4	5.8	44	18	22	4.2	1.76	2	1.11	4.7	5	135	86	25.15
pre-hypertension 3	Female	56	12.2	4.6	7.3	45	35	25	5.05	0.82	2.68	4.76	5.6	13	121	78	29.41
pre-hypertension 4	Female	56	11.1	4.7	4.4	46	14	15	3.72	1.1	2	1.35	5.6	5	124	79	26.57
pre-hypertension 5	Female	46	.	.	.	.	.	.	.	.	.	.	5.7	5	131	83	27.59
pre-hypertension 6	Female	46	13.9	4.6	7.4	49	16	17	4.25	1.45	2	1.09	5	6	127	82	24.51
pre-hypertension 7	Female	53	14.5	4.9	6.1	46	30	21	5.15	1.43	3	0.81	5.9	5	123	85	29.46
pre-hypertension 8	Female	43	11.7	4.2	4.4	44	17	16	3.71	0.98	2	2.04	5.9	5	123	87	26.28
pre-hypertension 9	Female	54	13.5	4.4	5.9	49	15	17	6.01	1.36	4	2.34	5.7	5	133	89	22.94
pre-hypertension 10	Female	49	.	5.2	13	48	39	28	5.63	1.5	4	1.16	5.7	5	123	86	28.65
pre-hypertension 11	Male	51	14.5	5.1	6.9	46	21	16	4.55	0.9	3	1.23	5.4	5	123	82	27.37
pre-hypertension 12	Male	57	16.4	5.2	5.4	49	27	25	5.24	1.43	3	1.39	5	5	122	78	22.41
pre-hypertension 13	Male	51	15.4	5.2	10.2	44	26	21	6.02	0.94	3	3.65	5.5	5	123	75	29.9
pre-hypertension 14	Male	52	14.5	5.3	7	45	49	35	4.26	1.13	3	1.19	6.2	8	123	91	25.38
pre-hypertension 15	Male	50	13.5	4.8	6.4	48	34	20	5.31	1.24	3	1.64	5.2	2	132	83	29.94
pre-hypertension 16	Male	53	15.9	5.7	7.5	45	19	21	4.48	1.5	2.44	1.18	.	5	135	85	26.95
pre-hypertension 17	Male	49	16.5	5.6	8.1	45	28	20	4.27	1.22	2.51	1.17	.	.	127	87	27.5
pre-hypertension 18	Male	55	14.9	5.2	6.6	45	22	13	4.46	1.23	2.6	1.37	4.7	5	127	77	26.51
pre-hypertension 19	Male	59	15	4.9	6.1	48	15	18	4.64	1.31	2.45	1.91	6	5	120	66	25.35
pre-hypertension 20	Male	49	16.1	6.8	7.1	46	18	17	5.13	1.12	3.29	1.57	5.3	.	128	97	26.06
pre-hypertension 21	Male	42	16	5.4	5.4	50	38	33	6.19	0.89	2.64	5.91	.	5	128	83	28.18
pre-hypertension 22	Male	46	15.8	5.5	6.8	45	34	17	5.3	1.36	3.45	1.06	5.4	7	139	90	26.75
Hypertension 1	Female	52	11.7	4.6	6.5	42	16	18	4.92	1.72	3	1.24	6.4	10	142	96	27.16
Hypertension 2	Female	48	13.8	4.4	5.2	48	21	16	5.94	2.21	3	1.23	5.6	5	146	70	26.72
Hypertension 3	Female	47	14.8	5	6.5	44	11	15	5.99	1.81	4	1.22	5.7	5	162	110	24.8
Hypertension 4	Female	60	14.2	5.1	5.5	50	16	16	4.67	1.68	2.37	1.36	5.9	5	168	90	29.77
Hypertension 5	Female	60	13.4	4.8	8.1	49	16	17	5.25	1.5	2.89	1.87	5.8	.	143	82	29.88
Hypertension 6	Female	51	11.3	4.9	4.9	43	16	13	5.47	1.06	3.62	1.72	6.4	5	141	84	28.12
Hypertension 7	Female	68	13.7	4.6	6.3	44	18	21	3.75	1.88	1.53	0.75	5.8	5	142	83	26.45
Hypertension 8	Female	44	10.7	4.3	5.9	43	15	23	5.8	2.22	3.13	1	5.5	5	140	91	28.99
Hypertension 9	Female	59	12.1	4.4	4.5	48	17	22	5.7	2.35	2.95	0.9	5.3	<5	192	83	27.19
Hypertension 10	Female	57	13.1	4.3	4.2	45	34	32	5.8	2.11	3.38	0.6	5.1	.	148	80	22.47
Hypertension 11	Male	30	13.5	5.8	5.4	48	33	29	5.28	1.19	4	0.74	5.3	5	147	91	26.15
Hypertension 12	Male	56	16	5.2	4.2	46	77	60	4.36	0.93	3	1.42	5.8	5	147	99	27.6
Hypertension 13	Male	52	14.6	5	4.9	51	31	24	4.61	1.15	3	1.26	5.6	5	145	94	27.89
Hypertension 14	Male	44	14.6	5	6.7	48	47	26	5.95	1.23	4	1.35	5.4	5	140	88	23.58
Hypertension 15	Male	49	16.9	5.6	8.8	46	47	29	5.59	1.46	3.47	1.43	5.2	.	141	99	27.91
Hypertension 16	Male	63	16	5.2	6.9	41	31	27	4.44	1.19	2.48	1.68	5.7	.	166	106	29.29
Hypertension 17	Male	43	14.2	5	5.6	51	24	24	4.7	1.38	3	0.7	5.2	5	145	93	21.49
Hypertension 18	Male	40	15.5	5.8	5.2	49	40	21	4.5	0.9	2.25	3	5.9	<5	149	89	25.13
Hypertension 19	Male	48	16.2	6.4	6.6	47	20	22	5.8	1.45	3.94	0.9	6.4	.	153	110	28.08
Hypertension 20	Male	35	14.5	4.9	6.2	46	24	18	4.3	1.2	2.7	0.9	5.3	<5	145	93	29.14
Hypertension 21	Male	45	16	5.4	7.1	46	25	18	4.5	0.96	3	1.2	5.1	<5	157	100	25.92
Hypertension 22	Male	54	13.7	4.6	4.6	45	19	15	5.4	1.05	3.98	0.9	5.4	<5	143	92	28.58

## Sheet: Discovery_Proteomics Data
Cases/Controls	10336-3_3	10337-83_3	10339-48_3	10342-55_3	10344-334_3	10346-5_3	10351-51_3	10356-21_3	10358-33_3	10361-25_3	10362-35_3	10363-13_3	10364-6_3	10365-132_3	10366-11_3	10367-62_3	10370-21_3	10372-18_3	10990-21_3	11067-13_3	11071-1_3	11081-1_3	11089-7_3	11094-104_3	11096-57_3	11098-1_3	11101-18_3	11102-22_3	11103-24_3	11104-13_3	11105-171_3	11510-31_3	11513-92_3	11514-196_3	11516-7_3	12060-28_3	13088-397_3	13089-6_3	13090-17_3	13093-6_3	13094-75_3	13095-51_3	13097-11_3	13098-93_3	13101-60_3	13102-1_3	13103-125_3	13104-32_3	13105-7_3
Control 1	828.4	949.6	11461.9	912.5	1172.3	1669.2	1194.1	5310	818.4	249.5	331.4	11036.3	10341.2	863.6	1566.9	241.8	6364	316.4	1805.7	1434.5	231.7	960.7	1951.7	483.2	2110	280.3	341.5	1655.5	4303.5	29239.5	17625.4	24827.2	720.2	1567.7	5137.3	870.6	438.8	339.1	2276.4	962.4	1445.5	361.6	450.7	502.2	31331.8	24132.5	1474.6	1340.3	1059.3
Control 2	465.6	757.5	10517.1	728.6	1285.4	323.6	1702.3	4954.1	831.6	289	376.4	4402	1703.2	1015.6	1808.8	274.3	1614.4	190.6	1835.3	1471.6	284.7	978.5	2818	33273.6	978.3	273	454.2	1917.8	1040	11430	6008.3	24808.8	583.2	1670.2	3123.4	937.4	420.8	466.5	1320.1	1019.8	1413	358.3	531.9	575.5	49318.7	6467.9	1541.5	1309.9	1357.9
Control 3	520.9	1732.7	13029.4	660.1	1327.9	1574.3	6790.4	4084.9	947.4	300.5	409.8	6703.7	5293.9	1728	1665.7	585.3	3795.2	286.7	2166.9	1817.9	281.1	1757.5	4693.1	701.4	1600.1	256.9	453.4	1494.1	3263.2	6820.2	21581.2	35669.5	688	1606.8	3187.6	913.1	422.6	462.1	2020.5	1200.1	1126.3	333.5	1067.6	697.1	20771.8	7968.6	1474.4	1366.7	1980.2
Control 4	494.3	655.6	17107.2	651.1	1130.8	612	1544	5021.1	1260	356.3	384.2	4803.3	2764.6	1044.5	1521.7	1507.8	2049.8	339.4	1519.6	1131.2	280.8	1651.9	3402.1	474.5	1267.3	325	303.3	2463.4	1725.5	9466.9	17895	27656.4	553.6	1797.7	3574.6	749.2	404.9	403.6	2030.3	927.6	1443.6	435.3	386.7	531.7	30234	3280.1	1347	1020.4	1043.8
Control 5	400.4	585.2	12055.2	561.3	1070.6	607.5	819.3	4447.8	2358.6	365.7	493.4	5035.6	4637.1	1565.8	1228.2	294.2	2289.1	260.3	1274.7	1801.4	269.3	1396	5137.4	535.7	1116	300.8	503.7	2487.1	2561.5	13487.1	14230.5	30840.4	673	1989.8	4265.1	766.5	524.9	479.2	2579.3	1034.7	1685.3	533.8	391.7	574.9	27641.2	11022	1082.1	1478.8	1199.8
Control 6	750.9	636.4	12595.3	786.4	1084.6	1533.2	1151	4843.8	1273.4	314	400.5	11563.7	10059.9	914.1	1284.9	261.7	6603.2	329.4	1749.5	1066.5	281.8	1550.1	2875.4	1073.6	1896.8	255.3	518.8	1214.1	2966.8	15188.9	25455.1	54946.5	776.2	1522.3	5598.2	758.4	480.9	377.7	2006.7	771.2	1881.4	345.9	470.3	384.9	32908.3	15658.2	3646.8	1306.3	1002.3
Control 7	635.4	1036.5	11324.9	697.1	1198.3	1211.1	918.9	6050	1058.4	307.4	358.2	8197.3	6918.8	1233.5	1098.8	590.1	4945	318.2	1753.5	1203	280.4	1553.7	4906.2	449	2006.4	268.6	383.3	1520.7	3859.8	18950.9	23507.5	43827.5	635.4	1349.1	2458.7	902.7	434.3	475.7	3164.5	1025.7	1074.5	230.9	482.7	504.4	17810	5581.9	1534.6	1270.6	970.6
Control 8	509.8	761.4	9365.3	813.8	1202	618.5	1228.5	5068.2	815.2	333.2	792.4	6187	4064	2423.7	1722.5	250.2	3207.1	269.5	3039	1083.5	286.9	1075.6	3262.8	1471.7	1253	245.8	310.9	1471.3	1973.7	11608	12361.2	37008.2	545.9	1296	5674.4	1184.8	506.5	461.1	2164.5	952.7	1361.1	321.9	409.5	637.5	13300	4337.6	1289	1299.8	1179.6
Control 9	429.7	1154.3	10807.3	304.1	1594	926.5	1114.5	4428	1095.7	445.8	330.5	5630.7	5216.2	1473.4	966.8	248.7	2810.3	224.4	2270.9	2080.3	379	1751	7284.8	586.6	1756	239.8	446.8	1791.8	2192.6	12605.3	24213	32417	742.1	1672.3	5140.5	860.1	509.9	355.8	502.6	1581.4	1350.9	621.1	411.4	413.2	19587.1	6218.9	1985.8	821.2	1464.1
Control 10	453.7	858.1	15888.7	699.1	1536.3	568.7	1000.7	4638.8	1062.6	239.6	329.8	6306.1	3463.6	1279.1	1516.3	226.4	2857.2	271.1	2054.3	1268.3	239.6	2967.6	6855.8	680.6	1164.5	323.6	339.5	2209.5	1589.9	13516.8	15573.6	31954.7	888	2089	5867.5	1003.8	701.7	317.4	2549.2	948.1	1315.4	388.4	450	475.5	29753.7	6409.4	1729.4	805.7	1833.8
Control 11	500.3	825.9	11898.9	718.8	1246	685	1045.4	7786.1	1078.2	305.5	441	5160.2	3335.3	1446.6	1167.1	277.4	3030.7	263.8	1953.8	2406.9	406.9	1068.4	2876.8	692.9	1379.8	246.9	319.9	1377.5	1823.5	9797.3	14492.1	37286.2	611.2	1533.6	3372.3	1201	544	588.3	1129.8	1052.5	1616	255.8	514.9	584.5	22437.8	5533.8	1122.7	1290.6	1238.9
Control 12	472.2	831.6	4777.1	617.6	1494.9	776.9	815.8	4785.6	976.3	474.7	647.2	4110.6	2300.5	1119.8	994.4	341	4276.2	499.5	1880.3	10680.8	322.3	1436.2	3172.9	627.2	1227.2	246.4	347.5	1438.2	1275.5	14413.5	8668.1	39829.6	552.2	1757.1	3492.1	823.2	712.1	768.3	2032.2	1606.1	1046.7	908.8	427.9	508.4	13467.8	4602.5	880.4	2114.2	1517.1
Control 13	428.4	727.8	12466.8	614.9	1359.5	425.2	1011.7	5165.7	970.4	367.8	327.8	4095.6	2376.1	726.8	1657.2	264.2	2724.5	242	1901.8	2220.2	319.9	1475.5	3401.1	696.7	1159.9	227.4	367.5	1556.3	907.8	10941.5	10667.5	57245.8	589.4	1729.3	7127.6	1026.1	2130.1	596.3	2454.7	1247.1	1153.4	352.5	433.5	490.9	18560	11903.6	1402.9	1135.4	1575.1
Control 14	2634.4	890.5	10309.2	614.7	1352.4	810.1	996.4	5784.1	856.3	321.8	643.7	7796.1	4804.2	729.4	2513.3	266.5	3576.6	282.3	1743	2200	280.2	1057.5	4453.1	521.7	1592.9	256.1	291.3	1297.5	1764.2	8865.2	15874.4	52299.5	538.3	1897.8	3841.5	1048.9	527.6	387.3	3032	889.4	1712.8	362	430.5	291.3	44784.1	17311.7	1531.6	1325.3	3094.3
Control 15	708	883.7	10617.2	715.8	1261.4	1480.1	954.9	5043.7	963.5	307.5	408.2	7798.4	6966.2	1120.7	1117.3	554	7010	288.3	1918	1074.9	959.6	1624.6	4632.5	538.3	2259.1	255.4	349.9	2062.1	3341.2	17220.4	29600.6	47165.2	534.2	1295.2	5666.8	884.3	686.1	814.2	3449.9	1242.7	908	623.2	408.2	545.7	30250.3	24175.4	1931.1	1071.4	1254
Control 16	668.6	987.4	10124.2	640.7	1318.4	448.3	1130.3	6642.9	897.8	328.6	368.6	4413.6	2704	845.1	1475.8	273.4	1587	218.7	2047.4	936.5	256	1640.5	3371.7	504.2	1181.8	261.6	363.5	1835.1	1359.5	9368.3	7630.1	29873.2	596.6	1640.8	3318.9	871.4	455	1114.7	1014	1212.2	1079.7	342	495.8	414.5	18522.6	7738.4	1393.5	1388.2	1239
Control 17	612.4	712.7	13938.6	644.3	1287.5	977	1273.7	4229.1	912	274.6	386.3	8382.7	7214.6	910	1494.7	253.3	5880.1	277.5	1913.6	985.2	265.2	2382.1	4893	496.3	1937.8	247.4	326	1565.6	1923.4	1174.4	14216.8	37059.1	577.2	1885.4	4033.8	915.3	409.6	346.3	1924.7	1258.6	1195.4	393.6	511.4	529.2	26736.2	6846.8	1674.6	1429.4	1256.2
Control 18	665.9	817.4	9803.8	634.4	1224.2	1105.5	1183.3	6099.5	2476.1	379.9	1705.2	9222.5	6626.9	1126.7	1269.3	332.5	4856.2	322.8	1752.6	1641.8	240.9	993.6	5978.8	917.6	1724	212.5	355.1	4575.1	4533.8	13814.3	19261.7	35085.3	644.8	2818.6	3136.1	1298.3	554.3	527.5	1323.8	1571	1176.6	358.9	515.5	399.1	18085.9	11791	1867.7	1413.4	1442.5
Control 19	1006.1	855.8	11949.1	828.9	1125.7	2322.5	989.8	4762.6	1564.3	253.5	385.8	11643.4	10720.1	594.7	965.2	250.3	12552.8	408.2	1974.7	1236.9	251	527.7	3288.4	488.8	2394.2	330.5	278.9	959.4	8241.3	3814	30286.2	39767.4	497.5	1330	2532.7	977.1	545.3	764.7	2698.4	1096.7	919.5	229.8	411.4	381.8	16024	3483.5	3758.1	1449.8	1051.9
Control 20	528.3	1383.8	14129.4	544.7	1358.4	942.3	1081.4	4085.7	1626.3	248.5	348.6	6096.8	4702.6	1052.9	1550.9	252.1	1873.2	325.7	2578.6	2225.9	238.9	909.1	132.6	522	1718.8	240	472.9	1243.3	1923	21121.1	20056.8	40475.5	638.9	1050.4	3478.6	1115	351.1	318.9	1174.5	748.8	2806	273.4	566.2	536.7	22947.2	8865.8	1333.5	876	41212
Control 21	1484.3	936.1	16692.4	483.5	1089.1	2155.7	1243.2	4536.8	851.9	382.1	419.5	14314.4	12104.4	717	1037.7	273.5	8456.5	360.5	1775.4	1777	227.1	1294.2	5627.2	435.9	4841	262.7	306.4	1007.7	4738.2	1484.7	40692.8	39534.7	592.7	1302.3	2069.2	739.2	517.2	569.4	2937.1	979.7	1131	341.9	452.1	363	17641	20187.5	2215.9	1666.3	1158.5
Control 22	1142.3	824	11187.8	655.5	1096	1001.6	1172.5	4777.7	859.4	232.6	289.3	10563.7	10434.6	685.7	1341	349.8	8291.4	343.6	1700.1	1041.2	291	2094.3	6212.9	571.5	1961.9	302.1	450.9	1011.5	4343.7	16476.1	21866.9	30247.9	584.6	1237.6	3211.7	1096.3	486.6	436.4	1698.6	1076.8	1610.9	309.4	558.2	1025.8	26723.3	14663.5	2476.3	1228	1583.2
Control 23	1387.4	937.1	13575.3	883.6	1212.3	3455.6	1022.4	4649.5	1019.4	1479.2	436.2	18911.1	25105.5	530.6	802.3	252.1	33450.9	531.4	2374.9	1277.3	207.7	2066.5	3706	426.1	4004.3	395.2	264.3	967.4	5642.2	3083.5	39703.4	42423.7	486.6	1288	3643.4	1037.1	512.9	383.2	2681.2	885.3	831	279.3	551.7	386.8	14302.2	2909.9	3803.3	1286.5	1250.2
pre-hypertension 1	655.1	880.7	14714.8	519	1286.5	717.7	965.6	4691.6	993.8	325.1	370.8	7064.8	5372.1	587.3	1652	246.5	2968.8	277.8	2077.8	1558.3	312.4	2345.5	5017.7	3038.7	1476.7	409.3	416.2	1813.2	25913.2	14121	14882	32905	1002.7	2405.8	5139.9	807.5	444	415.4	1782.5	1213.4	1200.7	435.9	461.3	459.8	40113.5	13685.6	1541	1330.1	1429
pre-hypertension 2	464.6	1005.5	17172.9	830.7	1252.3	926.5	1376	4981.4	1179.2	268.1	282.2	4855.8	3787.8	1977.9	1192.7	237.2	3523.4	209.5	1824.7	1023.6	324.2	2678.8	5310.8	523.2	2003.3	346.6	341.6	4337.1	3002.6	35492.3	22026.5	26350.3	611	2126.2	4208.9	1633	524.2	380.4	3016.5	1368.5	1378.9	215	398.2	468.6	19596.2	5532.1	1805.1	881.1	1055.1
pre-hypertension 3	651.1	757.4	13147	502	1133.5	1559	1089.6	4385.4	1059.5	290.3	370.9	9007.1	7822.5	2872.4	1063	258.3	5474	284.5	1861.3	1748.6	285.6	1480	2007.2	458.1	2036.9	320.1	330.6	1237.1	3624.2	38879.8	21929.2	32478	630.3	1501.8	4538.6	777.6	413.7	357.8	2942.1	804.5	1446.7	272.4	479	402.9	32610.8	18561.3	1461.6	1253.3	1255.2
pre-hypertension 4	563.2	680.7	11334.4	650.6	1122.4	642.1	939.2	4296.7	815.1	283.9	339.9	5710.2	3924.4	1311.9	1268.8	234.4	2732.2	220.5	1772.7	913.9	228	1608.6	2839	476.1	1252.6	217.6	313.2	1266.2	2029.7	2716	8800.4	29980	485.5	1476.5	5416.8	834.7	425.2	463.6	1609.2	993	1112.5	359	432.3	472.9	25534.7	20935.1	1394	1227.7	1170.4
pre-hypertension 5	686.4	786.7	10892.8	533.8	1150.9	1329.3	992	5225.7	909.5	875.9	452.4	8678.1	8621	1301	1356.3	1865.5	4690.2	273.6	2022.6	1266.8	899.4	1743.7	6095.4	950	1975.7	322.1	804.3	1751.1	2737.9	5962.8	17900.3	23106.9	859.9	1598.9	2132.7	1012.2	553.8	955.3	1327.5	970.5	1616.7	404	699.1	392.6	16384	25912.5	1836.2	1151.6	1271.7
pre-hypertension 6	527	674.1	12812.5	533.3	1122.6	1276.5	1043.6	4711.8	793	339.1	407.6	7671.6	6757.4	1049.5	1094.8	271.8	4528.6	315.4	1631.7	1225.7	243	1534.7	4053.2	553.8	2083.6	369.2	287.1	1342.2	5211.2	17397.9	23449.1	33287.6	538.1	1443.4	2656	706.2	435	562	2656.1	896	1368.9	258.9	445.3	374	20980.4	6230.1	1649	1221.5	1168.1
pre-hypertension 7	625.5	2332.6	11714.6	991.6	1196	709.2	971.5	4753.5	1313.4	338.3	393.3	6646.2	5443.6	892.2	1110.3	270.4	3634	246.5	1871.8	950.1	289.3	1781.8	4018	492.7	1331.1	251.7	346.6	2444.3	1872.3	13378.7	12961.8	21711.7	585.2	1786.8	2681.9	721.9	474	446.4	2077.1	969.4	1125.3	464.5	465.2	428.8	14554.8	5616.2	1767	1322	1338.1
pre-hypertension 8	567.6	797.4	12005.1	595.4	1341	629.6	1114.1	4419.7	1000.7	390.2	365.3	5535.6	3820.3	1982.3	1249.8	634.1	2395.9	230	1719.1	2064.2	266.5	1835.9	2610.4	495	1173.1	263	325.7	2662.3	2281.9	25580.6	11681.2	30507.7	564.2	1698.4	4289	825.2	455.3	385.1	1721.6	1424.2	1235.9	521.7	483.5	526.7	18773.5	18218.8	1566.9	1428.9	1127.4
pre-hypertension 9	420.7	519.1	11290.8	377.6	1224.7	987.6	1004.1	40883.5	1968.8	315.1	330.3	6090.9	5806.8	1366.5	2095	261.2	4300.6	248	1828.9	1311.2	366.5	1604.4	2487.6	1669.1	1416.1	298.3	599.4	3589.5	1732.2	20672.4	11684.3	27702.9	815.8	1745.6	20438.8	1194.9	466.3	325.3	1932	1031.2	1110.5	378.1	498.1	371	26251.6	5052.3	1322.4	1284.5	1303.1
pre-hypertension 10	970.3	1035.4	4501.9	768	1178.1	341.4	1008.1	6328.5	969.9	299.4	367.6	7081.9	2599.3	670.7	658.3	249.5	3594.7	343.7	3839.2	1126.6	302.8	908.8	3958.6	623.4	2550.5	148.3	317.8	1333.6	1605.5	6899.9	10745.8	43207.9	848.3	1383.6	1633.1	808.9	391.9	461.6	2792.5	1088.4	1038.6	433.5	339.6	361.5	58043	4440.7	3351.8	1311.7	1790.8
pre-hypertension 11	637.6	789.7	10146.6	707.4	1098.9	529.8	1029.9	7877.4	886.4	1293.1	1831.1	5314.6	2626.7	1130.1	1808.6	224.1	2761.6	271	1797.3	1146.4	316.4	1572.2	5789.9	452.8	1008.9	220	402.5	1526.2	1671.3	17310.7	10580.1	47758.7	557.7	2010.1	4519	857.3	532.6	445.4	1695.9	937.9	1235.3	297.2	502.8	527	25824.7	21798.5	3981.8	1144.7	1121.7
pre-hypertension 12	580.3	5097.8	10637.6	499.1	1037.4	671.3	1168.5	5401.8	1365.5	343.5	355.5	6141.2	3562.2	1237.6	1460.6	374.6	3331.2	273	1407.5	2783.4	246.4	1204.9	5190.7	460.9	1352.1	238.7	298	1038.7	2071.4	25558.2	12120	34666	564.6	1753.2	4705.5	1068	526.8	397	1891.4	1141.7	1289.7	423.8	398	381.4	38106.1	6387.8	1457.1	1293.3	1847.9
pre-hypertension 13	589	1003.7	14217.1	598.2	862.4	622.6	1111	4910.3	949.7	326.4	441.1	7238.5	4015.4	947.7	1296.1	365	3416.6	366	1490.6	942.1	277.9	1731.7	7420.5	703.6	1377.7	247.2	385.5	1841.1	2157.3	25430.3	20826.5	35124.3	680.5	1670.5	2791.8	765.3	465.4	402.5	2684.1	1226.4	1577.3	595.2	392	323.5	38762.7	6692.8	1540.1	1029.2	1273.4
pre-hypertension 14	444	857.4	4834.5	630.6	1464.2	522.9	1038.4	5001.4	1122.6	339.6	408.5	5230.4	2230.7	734.1	6904	332.2	7527.5	247.6	1964	903.9	1627.9	1094.3	4775.9	579.8	1182.3	221.2	435.6	1402.7	1058.5	2003.8	9721.6	33831.3	642.4	1789.9	2398.4	865	444.6	429.2	1519.6	1442	1305.1	491.5	486	434.6	62098	5094.6	1673.4	1135.4	1774.5
pre-hypertension 15	505.3	780.2	9066.9	622.5	1279	733.8	1143.6	4835.1	1064.6	331.9	343.1	6291.3	4085.1	800.5	1052.7	242	3385.8	239	1814.4	904	284.4	1710.3	5711.2	482.8	1572.6	267.6	356.6	1193.3	2160.8	22481.7	13368.9	45373.7	569.9	1687.8	4745.1	878.2	403	391.7	3613.8	1034.7	1046.9	322	453.4	483.1	43279.1	13014.3	1334.1	976.6	1333.6
pre-hypertension 16	1266.2	714.2	11197.9	888.6	1175.8	757.9	967.4	4465.5	981	378.6	295	6300.6	4277.6	1210.7	1747	239.4	3820.3	305.3	1829	1254.2	331.8	1841.8	4159.3	508.8	1452.6	268.2	411.4	1993.7	2813.1	2804.8	12468.3	47873.4	671.4	1999.6	3873.2	753.3	428.7	375.3	2740.4	1127.7	1544.3	393.7	449.2	452.9	29659.6	10496.7	1463.7	1563.9	1364.1
pre-hypertension 17	536.6	778.4	9071.9	563	1450.2	791.4	951.1	5078.1	914.4	348	357.1	7626.5	5631.8	901.3	895.8	269.5	4669.2	270.6	2065.8	1524.2	269.4	1345.4	5487.1	547.3	1373.1	228.8	1443.8	1387	1725.8	9883.2	11328	39742.6	606.1	1889.5	2805.3	1992.6	465.1	465.8	3390	1067.9	1029.6	386.7	501.9	377.9	30532.2	4230.4	1565.5	1285.7	2089.9
pre-hypertension 18	443.3	820.5	10790.4	851.6	1070	565.2	925.7	4762.5	1023.1	1302.9	655.6	5401.2	2543.9	1391.4	2059.5	245.6	2380.3	258.6	1665.2	1040.6	311.9	1439.7	4085.5	447.3	1090.6	235.5	370.8	1958.9	1779.7	18173.5	11783	32682.7	542.5	2157.4	4203.4	843.8	458.3	359.4	2468	1168.9	1397.4	435.3	533.6	292.1	31255.2	5043.2	1381.1	1185.3	1404.2
pre-hypertension 19	588.6	987	5545.5	658.7	1092.5	721.5	1169.5	5847.4	954.9	301.1	356.9	8610.4	4877.1	500.7	866.6	270.2	5425.7	269.6	1734.4	1054.6	461	951	5960.5	550.7	1228.3	170.9	600	1470.1	2000.2	23256.4	10912.8	36938.9	723.7	1787	1793.2	775.5	446.4	444.8	2633.9	1375	1383.1	348.4	441.9	519.5	63533	7870.5	1876	1205.8	2084
pre-hypertension 20	556.7	374.2	8893	532.4	1105.5	990.2	971.5	4835.2	861.9	457	349	6684.4	5659	1068.9	1081.2	249	4422.6	294.9	1801.6	2929.8	554.6	844.1	5430.8	711.8	1438.1	696.3	338.5	1135.8	5741.1	14653.8	18006.9	45715.6	646	1937.8	3153	811.4	565.9	1033	1780.2	1205.8	904.3	454.7	435.4	696.2	32444.6	24300.8	1968.1	1399.5	1489.1
pre-hypertension 21	609.6	1062.3	8483.5	714	1336.4	995.9	1369.1	5373.3	925.7	320.1	344.4	9513.1	8230.2	1251.3	1124.4	209.8	3379.2	317.8	2280.2	1398.1	298.9	2494.3	4186	676.7	1717.8	439.1	788.4	999.3	3510.9	34751.4	19974.4	46767.9	564.9	1209.9	3413.7	925.6	388.2	361.2	1231.5	947.9	661.2	289.8	499.8	423.4	26697.1	4449.5	1512.8	1117.3	2352.8
pre-hypertension 22	598	974.1	5844.5	863.5	1082.2	544.5	3028.4	5290.1	1043.1	2605.6	1043.2	4408.2	2915.1	1059.7	1264.1	1118.1	2070.9	252.1	1691.4	1808.9	366.7	1130.7	4663.8	503.6	1168.7	235.9	365.6	1309.7	1026	23251.2	7018.6	37505.5	509.5	1772	4272.7	1160.9	1055.6	556.3	1390.3	987	1365.5	338.3	558.8	545	38833.6	4531.4	1989.8	1452.3	1660.9
Hypertension 1	523.5	693	8758.1	725.8	1373.8	416.3	872.8	4519.7	1492.9	342.3	849.1	4115.2	2222.8	1428.1	1869.4	270.6	2236.6	379.6	1500	12959.7	323.6	1346.1	5736.6	775.1	1360.3	268.7	358.3	1900.2	1103.4	16963.7	6891.9	41304.5	564.6	1558.2	3141.4	777.1	614.7	407.3	701	1032.2	1204.5	300.9	405.9	417.7	23547.4	5946.4	1040.1	1094.7	1300.5
Hypertension 2	500.3	891.9	7609.2	716	1626.6	778.5	1352.3	5364.1	828.1	329.9	437.2	5002.1	3436.3	662.7	1717.4	257.3	4059.9	285.4	2311.8	2010.3	773.9	1193.4	3012.6	629.7	1640.4	270.5	436.6	1388.1	2477.1	14235	10609.3	24509.7	656.5	1453.4	4371.6	910.5	470.2	448.7	2200	1099.4	912.2	342.1	521.5	414	15458.6	5294.3	1661.8	1282.1	1672.4
Hypertension 3	568.9	653	11672.6	961.7	1792.5	915.9	966.2	4836.9	1168	354.1	501.5	4298.7	3330.3	1037.7	1248.5	402.6	2312	259	2267.3	1102	406.1	1022.2	4585.1	530.6	1476.3	248.5	348.5	1374.2	2529.1	5158.8	16554.2	36260.8	649.5	1481.2	2879.4	1002	428.4	330.1	2015.3	1172.1	1614.2	365	509.4	534.8	36237.8	6323.7	1199.1	1279	2011.5
Hypertension 4	622.5	1330.6	10797.2	1744.5	1846.7	1433.1	1070.5	22563.4	974.2	6493	756.8	6416.1	6642.4	1231.3	1396.8	320.3	4691.3	470.6	1947.4	1093.2	347.1	1749.4	4665.4	624.3	1955.2	298	375.6	1592.2	4204.5	27347.7	18312.6	35471.1	782.5	1535.4	4002	1466.6	714.9	427.6	1644.5	914.2	1383.3	347.2	585.8	743.6	27825.7	17580.4	2683.4	1236.7	1827.4
Hypertension 5	475.6	522.1	7839.2	734.6	1252.1	1089.5	1124.5	5070.6	1044.1	357.2	357.6	6319.7	7406.1	1161	1062.8	278.8	4324.3	347.4	1961.8	1495.6	287.2	1054.2	5701	511.6	1938.5	400	508.2	1388	5279.8	5099.1	20656.3	29620.5	805.1	1310	2597.4	747.1	369.7	337.2	792.9	1382.7	671.7	248.3	463.1	426.2	33461.6	7777.8	1430.7	1211.9	1027.7
Hypertension 6	723.2	519.6	13709.7	712.5	1215.2	2136.3	1187.6	4669	2005.6	278.9	420.2	14740	17378.3	1429.6	1451.2	284.1	11726	393.8	2156.9	1702.1	256.8	1337.4	4431.9	462.4	2547	258.7	303.5	1268.8	6802.3	12796.8	34915.4	61512.6	521.6	988.3	3044.8	749.2	392.1	420.5	1421.7	795.7	785.4	284	419.4	421.9	16778.3	5502.4	4416	1055.5	1274.2
Hypertension 7	740.6	1110.5	17205.4	6694.3	1058.1	1782.7	978	7849.6	933.7	459.9	454.7	13284.7	12509.6	2249.1	1182.9	453.8	6071.5	433.3	1803.2	1001.2	242.2	1356	4313.8	396.3	2352.7	237.1	296.8	1698.9	4397.6	2512.1	27593.1	23297.7	491.2	1880	2476.6	1297.5	979.6	424.6	2444.5	1015	1464.1	345.6	734.4	494.2	21398.4	7801.1	2633	1573.4	1100.7
Hypertension 8	657.9	748.5	10368.7	604.4	1079.9	1559.9	863.6	4527.7	748.8	451.8	431.7	9604.8	9810.4	1432.7	1982.3	238.6	5457.4	328.7	1517.1	1314.3	1249.6	1550	5151.6	521.2	2038.6	402.7	269.9	1283.4	2583.3	7533.8	17322.1	49293.3	553.5	1122.4	2445.4	729.9	368	477.3	1897.6	977.4	1685.3	510.2	461.2	550.4	14832	8426.7	1917.9	1147.2	1388.4
Hypertension 9	708.1	848.3	15950.1	580.5	1764.9	808.7	6098.4	4970.8	882.8	282.5	25125.1	7566.5	8353.1	1015	1285.1	336.1	5621	283.1	2358.6	1092.4	272.6	1688.4	3399.6	521.2	1624.5	255.3	333	1527.2	2739.6	21933.7	11213	40739.8	588.9	1919.6	3963.5	821.2	432	459.6	1974.2	1115.5	1415.2	408.3	521.4	432.8	26254.8	7381.6	2323.2	1236.2	1381
Hypertension 10	710.6	1068.6	14943.6	772.6	1214.7	785.7	1017.9	5973	1337.5	285.6	387.9	9115.6	5276.6	1190.1	1661	234.4	3822.9	247.1	1512.8	2604.4	309.7	1500.1	5183.1	479.3	1261.7	196.4	410.7	1940.6	1805.7	23861.4	10300	14262.1	642.4	1787.6	7685.8	1023.4	400.1	514.2	2166.3	881.1	2191.1	721.2	475.9	484.6	42964.5	8353.7	1599.8	1845.5	2989.6
Hypertension 11	862.7	2940.5	7088.6	706	1130.4	1464.9	1057.4	4414.7	1231.1	288.4	338.1	10758.8	9639.1	1029.9	1225.1	211.1	7000.2	288.7	1716.8	2330	240.8	1503.9	5284.2	520.6	2301.7	286.1	374.8	1129.6	2960	4218	19200.2	32227.9	592.8	1764.8	4904.6	939.2	414.4	331	3136.4	944.9	1409	356.1	1208.2	386.8	47771	8376.2	1922.7	1367.7	2316.2
Hypertension 12	802.1	845.1	11247.5	544.3	965	997.4	939.3	4728.5	1119.9	329.2	394.5	7232.9	5790.9	1548.2	1396.8	265.5	6703.9	286.5	1551.9	880.3	248.2	4124.7	5655.3	452.2	1777.9	594.9	348.5	984.9	3633	63132.1	24968.8	28836.2	500	1716.9	9069.3	809.7	397.8	556.8	2410.6	889	1244.9	443.2	14438.1	541.3	33149.9	4142.4	1738.9	1121.2	1309
Hypertension 13	443.9	720.1	12048.2	471.2	1317.9	611.7	1489.3	5966.5	1002.7	288.1	385.6	5647.4	3527.3	1601.5	1360.5	292.5	2370.7	222	1921.5	1327.8	300.8	1937.3	3715	516.1	1304.8	296.3	349.2	1497.4	2036.2	5631.7	11117.4	29855.2	566.7	1935.8	6122.6	839.8	521.8	575.1	1820.2	940.5	1141.4	436.1	455.2	581.7	21388.4	4925.7	1549.3	1149.8	1324.4
Hypertension 14	760.1	939.2	15263.8	561	1449.5	888.6	1146.8	4922.9	959.1	317.4	351.9	8929.2	8060.1	758.6	1155.9	501.5	5880.2	349.4	2529.5	1098.5	325.4	1434.1	4152.8	522.5	1861.2	278.9	372.6	1550	3242.3	7756.6	18717.9	34426.1	588.8	1645.2	3681.8	924.5	422.9	427.6	1715.2	865.9	1094.9	329.6	621.7	354.9	17252.7	2673	1859.2	1402.5	1559
Hypertension 15	638.4	763.8	13043.8	564.4	1256.8	1318.7	1050	6456.8	850.5	311.6	393.7	9813.2	8630.6	1690.6	1197.9	848.4	6641.5	381.6	1960.7	1486.1	226.5	4084.5	3162.4	615	1927.2	330.6	285.1	1414.2	2867.1	13176.6	28852.7	38396.3	753.1	1962.9	4655.2	1011.2	495.3	409	2301	941.4	1480.3	416.2	507.9	370.4	43048.3	5608.1	1956.4	1286.7	1113.9
Hypertension 16	1220.9	1016.9	14033.4	686.8	1020.5	1449.3	1363.5	5526.7	1148.6	298.8	419.7	16107.1	17265.6	2262.4	954	283.8	12754.2	360.7	1726.5	1895	342.8	1819.3	6253.4	526	2337.5	224.8	922.2	1917.3	9886.4	15398.7	22221.5	36346.6	574	1772.7	3470.3	790.4	525.5	416.1	2360.8	1237.5	1328.2	594.1	560.4	479.2	21538.9	20973.6	3035.1	1479.6	22369.7
Hypertension 17	497.6	677.2	10736.5	723.5	1181.5	1644.8	1218.9	4410.8	866.9	249.4	351.4	10127.9	10815	1288.2	1125.3	279.4	3972.1	326.3	1623.8	2971.1	346.3	1148.2	7840	567.6	2055.9	274.4	444.1	916.9	5010.8	4117.1	23276.1	27692.1	633.4	1262.8	4225	945.1	456.3	395.1	2432.2	1075.1	1483.8	379.2	314.6	399.1	21236.5	24976.2	1366.2	1224.4	707.4
Hypertension 18	881.5	1045.6	16018.6	593.7	1332.1	1663.2	1337.4	5183	939.6	371.1	376.3	13882	11081.4	854.9	1014.6	273.7	12128.4	573.3	2329.8	13515.7	284.8	1976.8	5114.6	908	2373.6	268.4	1716.4	1247.3	5635.6	10179.2	29554.5	35909.8	568.1	1577.3	3458.6	868.5	588.1	414.1	2305.2	1393.3	1165.3	468	489.6	341.8	18186.4	14632.3	2345.9	1418.1	1577.1
Hypertension 19	630.1	839.4	9126.7	915.2	1165.5	1539.3	900.1	9108.4	838.7	339.3	353.3	8610.1	10542.7	1410.5	895.3	256.2	6485.9	924.9	1805.5	1736	298.4	1766.5	2818.6	2353.1	1549	258.2	303.5	895	2126.8	12000.4	15744.8	39906.7	545.5	1603.3	3249.5	1281	505.8	489.4	1577.4	1093.2	1071.5	317.4	693.5	369.3	35095.3	6234	2022.2	1262.8	1427.9
Hypertension 20	1059.5	749.6	13524	613.8	1183.6	3141.1	1188.9	4725.4	794.2	283.4	410.6	19494.4	19382	951.6	1140.2	237.7	11440.8	448.1	1907.9	1269.5	352.5	989.8	2938.6	462.9	3332.7	495	321.5	1112.5	8353.8	6092.9	34303.1	33499.4	557.1	1574.5	2558.8	831.3	543.8	401.4	2873.6	861.2	1093.9	231.6	486.7	390.1	16084.3	5265.4	3471.9	1488.2	1162.3
Hypertension 21	990.9	1108.3	11264.8	548.8	970.1	3634.2	1051.4	5506.6	1013.9	486.6	382	18982.4	20552.4	1415.6	1841.4	269	11842.9	374	1815.4	1171.9	268.7	1038.6	7841.6	630.1	3849.9	274.8	367.8	824.7	1974.5	15177.8	40513.7	41278	584.8	1469	2085.6	638.1	560.3	469.7	3298.6	843.5	1158.9	189.4	549.2	471.5	18925.5	4088	2512.6	1402.3	1552.6
Hypertension 22	889.5	697	10143.6	620	1006.1	2021	1063.7	5237.3	863.1	252.7	282.9	16325.1	14996	2855.4	1101.7	228.1	9892.8	384.6	1715.1	916.6	355.4	1621	3743.2	442.1	3019.4	299.8	308.7	1071.1	7241.6	2618.4	28884.1	45039.2	737.3	1411.2	4178.1	885.7	409.7	273.5	3018.8	921.7	697.2	207.9	527.3	473.5	23591.8	6468	2856.7	1406.8	1023.3
[truncated: 1,256 more columns]

## Sheet: Validation_Clinical profile
Cases/Controls	Gender	Age	Hemoglobin (g/dl)	Red Blood Cell (x10^6/ul)	White Blood Cell (x10^3/ul)	Albumin (g/L)	ALT(U/L )	AST (U/L)	Cholesterol Total (mmol/l)	HDL-Cholesterol (mmol/l)	LDL-Cholesterol (mmol/l)	Triglyceride (mmol/l)	HBA 1C %	C-Reactive Protein (mg/l)	Average systolic blood pressure	Average diastolic blood pressure	BMI
Control 1	Female	33	12.5	4.1	5.9	44	14	15	4.91	1.82	3	0.44	5.2	5	102	64	21.29
Control 2	Female	30	11.5	3.9	9.4	42	10	12	4.77	1.18	3	0.95	5.1	5	101	71	27.31
Control 3	Male	35	14.8	5.7	6.3	48	18	21	4.98	1.1	4	0.81	5.3	5	117	76	25.99
Control 4	Male	31	14.4	5.4	4.2	47	35	24	4.15	1.08	3	0.95	5.4	5	118	79	28.78
Control 5	Female	32	11.7	4.4	10.2	44	15	19	5.77	1.19	4	1.34	5.4	5	99	71	26.13
Control 6	Female	40	13.2	4.8	7.8	47	22	16	4.43	1.13	3	1.23	5.7	5	107	73	29.95
Control 7	Female	38	12.5	4	4.9	44	10	16	4.23	1.75	2	0.74	4.9	5	94	63	29.21
Control 8	Female	37	13.5	4.9	3.8	45	8	11	4.42	1.94	2	0.47	5.6	.	112	76	22.4
Control 9	Female	31	11.9	4.1	7.4	47	14	15	5.43	1.25	4	0.78	4.9	8	106	74	29.8
Control 10	Male	39	15.1	5.4	4	47	43	29	4.83	1.13	3	1.97	5.5	.	98	67	21.85
Control 11	Female	53	11.2	4.2	5.6	49	15	15	7.04	2.31	4	0.98	5.8	5	110	76	27.91
Control 12	Female	39	13.4	4.8	6.2	46	10	11	5	1.36	3	1.47	6.4	5	107	67	27.07
Control 13	Female	46	11.9	3.8	5.6	42	15	19	5.88	1.75	4	0.68	5.5	.	95	62	24.43
Control 14	Female	34	12.5	4.4	7.1	44	9	11	6.53	1.73	4	1.42	5.6	5	115	74	25.82
Control 15	Female	48	12.6	5.2	10.2	48	27	22	3.16	1.1	2	1.05	6.2	5	105	71	28.08
Control 16	Male	38	15.5	5.3	4.6	50	62	26	5.33	1.2	4	1.27	6.8	5	108	78	29.41
Control 17	Male	39	13.7	5.3	9.6	50	17	20	5.55	1	4	1.56	6.1	5	103	63	24.41
Control 18	Male	30	14.5	4.9	5.6	47	38	20	4.62	1.46	3	0.96	5.3	2	103	72	28.29
Control 19	Female	30	12.5	5.6	6.8	47	21	21	4.85	1.34	3	1.22	5.7	4	115	73	24.59
Control 20	Male	30	12.6	3.8	7.3	48	22	64	8.13	0.98	6	2.53	5.4	5	101	71	28.48
Control 21	Male	40	14.4	4.9	4.9	45	49	32	5.34	1.13	4	1.33	5.7	5	119	84	27.65
Control 22	Female	30	12.7	4	7.9	45	21	21	4.18	1.99	2	0.83	5	5	96	62	28.8
Control 23	Female	39	12.4	4.3	7	44	10	11	5.3	1.47	3	1.05	5.4	5	99	68	26.27
Control 24	Female	51	13.1	4.5	3.3	47	17	19	6.09	1.41	4	1.78	5.7	5	111	83	25.03
Control 25	Female	33	11.8	4.3	6.6	44	19	18	6.41	2.24	4	0.81	5.4	5	103	71	26.78
pre-hypertension 1	Male	24	15.4	5.6	6.1	49	21	23	4.21	1.32	2.5	0.84	5.3	5	125	75	27.03
pre-hypertension 2	Female	25	13	4.8	5.7	48	12	17	5.7	1.78	3	0.96	.	5	120	83	19.8
pre-hypertension 3	Male	25	16.7	5.7	5.3	47	52	26	5.52	1.02	4	1.24	5.1	5	129	80	25.58
pre-hypertension 4	Male	26	16.6	5.6	9	52	30	21	5.1	1.23	3.11	1.66	4.8	5	123	86	27.31
pre-hypertension 5	Male	27	15.2	5.3	5.7	47	39	17	6.21	1.2	4	1.94	5.3	5	134	82	29.62
pre-hypertension 6	Male	29	15.2	5.9	6.8	53	13	18	4.75	1.33	3	1.09	5.2	5	127	82	18.35
pre-hypertension 7	Female	31	12.3	4.4	6.9	43	22	19	4.06	1.08	2.65	0.73	5.4	5	121	82	25.26
pre-hypertension 8	Female	32	11.9	4.8	6	45	12	17	5.34	1.28	3	2.36	5.7	5	131	92	25.79
pre-hypertension 9	Female	32	14.2	4.8	5.8	43	19	53	5.33	1.46	3.59	0.6	5.6	.	121	86	28.3
pre-hypertension 10	Female	35	12.2	4.6	6.1	44	8	12	4.19	1.61	2.27	0.68	5.1	5	125	83	24.14
pre-hypertension 11	Male	37	11.5	4.1	8.1	46	13	12	5.47	0.78	3.13	3.39	5.5	.	137	92	26.54
pre-hypertension 12	Female	37	10.6	3.9	7.6	40	13	15	5.06	2.39	2.04	1.38	.	5	135	92	28.38
pre-hypertension 13	Male	38	15.2	5.5	8.5	46	46	28	4.77	1.3	2.97	1.09	5.8	5	136	88	29.42
pre-hypertension 14	Male	39	15.4	4.9	5.9	49	31	28	6.07	0.97	4	2.78	5.5	5	133	85	26.89
pre-hypertension 15	Female	41	13.5	4.9	4.1	43	18	20	5.04	1.27	3.32	0.98	5.8	5	121	87	27.3
pre-hypertension 16	Female	41	13.1	4.6	5.4	42	14	14	5.86	1.14	3.56	2.53	5.5	5	127	79	29.73
pre-hypertension 17	Male	41	15.5	5.6	8.7	50	33	30	7.1	1.42	4.59	2.15	5.5	5	134	89	25.23
pre-hypertension 18	Female	41	12	4.7	9	46	6	13	6.35	1.99	3.92	0.96	5.2	5	125	91	27.67
pre-hypertension 19	Female	43	13.1	4.3	4.8	46	17	15	4.86	1.07	3.26	1.16	5.2	.	136	89	26.37
pre-hypertension 20	Female	44	14.1	4.9	6.8	45	20	20	3.42	0.93	2	1.19	5.3	5	121	90	29.65
pre-hypertension 21	Female	44	12.1	4.4	7	47	17	18	5.48	1.86	3.19	0.93	5.4	5	129	92	27.28
pre-hypertension 22	Female	44	12.8	5.3	8.3	47	7	11	5.06	2.87	1.9	0.63	5.5	5	128	83	25.99
pre-hypertension 23	Female	45	11.1	5.2	6.1	46	12	13	5.65	1.12	3.18	2.94	5.8	.	135	96	24.74
pre-hypertension 24	Male	46	15.4	5.1	5.6	48	58	33	7.2	1.28	4.65	2.97	.	5	124	90	25.3
Hypertension 1	Male	28	15.1	5	6.9	45	37	20	3.6	1.04	2.14	1	5.4	<5	140	80	35.99
Hypertension 2	Male	30	12.2	5.7	4.8	41	36	32	5.4	1.04	3.96	0.9	5.9	<5	147	96	34.13
Hypertension 3	Male	41	13	5.4	6	44	22	16	6.8	1.05	4.94	1.8	6	5	152	98	40.01
Hypertension 4	Male	41	14.1	5.5	6.5	48	26	19	4.9	0.95	3.33	1.4	6.2	<5	160	109	30.32
Hypertension 5	Female	44	14.6	5.3	7.8	46	14	21	5.26	1.5	3.37	0.86	5.2	5	144	94	30.13
Hypertension 6	Male	44	15.3	5.6	5.4	47	37	22	6	0.84	3.74	3.2	4.9	<5	172	111	39.38
Hypertension 7	Male	45	16.5	5.5	8	43	29	28	4.9	0.83	2.98	2.5	6.5	.	142	93	42.77
Hypertension 8	Male	46	15.8	5.5	7.4	48	43	28	5.15	1.09	3	1.23	6	5	146	92	34.7
Hypertension 9	Male	47	13.8	6.9	6.9	50	29	19	4.9	1.7	2.8	0.9	5.1	.	140	95	30.89
Hypertension 10	Female	47	9.7	3.8	8.5	42	11	17	5.6	1.21	3.9	1	5.5	<5	151	86	35.24
Hypertension 11	Male	47	16.3	5.3	7.1	40	30	22	4.6	1.09	3.12	0.9	5.1	<5	144	100	36.11
Hypertension 12	Female	48	11.6	4.8	9.1	45	16	14	4.7	1.13	2.48	2.5	7	5	144	74	33.55
Hypertension 13	Male	48	16.9	5.8	5.8	46	45	24	5.52	1.11	3.98	0.93	6.7	.	145	98	38.31
Hypertension 14	Male	50	14.8	5.1	6.2	46	29	23	4.86	0.85	2.81	5.05	5.8	5	141	89	31.07
Hypertension 15	Male	51	15.4	5.2	6.6	44	44	30	5.2	1.03	3.54	1.4	5.7	5	155	97	35.8
Hypertension 16	Female	52	12.5	4.4	8	46	16	14	7.58	1.22	5	2.7	6.9	5	149	100	33.1
Hypertension 17	Female	52	11.6	5.2	8.2	42	20	14	5.06	1.13	3	1.16	6.2	5	206	128	32.13

## Sheet: Validation_Proteomics Data
Cases/Controls	10336-3_3	10337-83_3	10339-48_3	10342-55_3	10344-334_3	10346-5_3	10351-51_3	10356-21_3	10358-33_3	10361-25_3	10362-35_3	10363-13_3	10364-6_3	10365-132_3	10366-11_3	10367-62_3	10370-21_3	10372-18_3	10990-21_3	11067-13_3	11071-1_3	11081-1_3	11089-7_3	11094-104_3	11096-57_3	11098-1_3	11101-18_3	11102-22_3	11103-24_3	11104-13_3	11105-171_3	11510-31_3	11513-92_3	11514-196_3	11516-7_3	12060-28_3	13088-397_3	13089-6_3	13090-17_3	13093-6_3	13094-75_3	13095-51_3	13097-11_3	13098-93_3	13101-60_3	13102-1_3	13103-125_3	13104-32_3	13105-7_3
Control 1	515.8	751.8	13693.7	405.4	1416.4	667.7	1055.9	5836.9	953	266	260.5	4301.6	3069.8	1522.9	1417.7	251.6	2193.8	280.1	1873.4	3587.2	195.2	1004.4	4600.9	485.6	1469.1	319.9	1640.1	1000.7	857.8	6539.4	15753.2	27532.6	581.6	1484.1	2117.3	914.5	593.2	471.8	3189.1	1037.2	1324.5	423.5	441.7	442.8	23574.7	3315.7	1762.6	1187	1063.8
Control 2	440.6	821.6	10143.3	570.1	1152.9	1026	1479.3	5190.9	1082.4	297.8	637.3	5982.5	4203.7	1310.5	1259.9	258.2	3346.3	290.1	1878.9	1196.1	293.4	1566	4037.3	502.2	1546.4	309.8	474.6	2302.6	2080.6	19737.9	19611.6	38949.8	605.3	1756	5198.6	993.8	429.6	727.1	2060.3	1570.2	1396	870	479.8	348.7	16063.5	7227.4	1457.8	1314.2	1255.2
Control 3	860.8	1159	9693.2	1815	965.6	1484.1	7225.8	8053.3	942.3	4028.4	457.2	11766	12767.1	912.3	1062.7	412.3	6405.4	408.3	1553.8	1047.6	236.6	1066.2	4449.9	403.7	1901.2	240.7	313.4	820	3671.5	7352.2	23219.7	58845	465.5	1343	3538	809.1	688.6	473.7	3844.1	958.3	1428.7	470.8	479.2	453.3	22218.9	3598.8	2371.5	1173.9	1585.5
Control 4	688.9	1160.6	8526.2	886.2	1066.5	2246.8	998.6	6013.9	7486.3	356	1126	11521.2	10701.9	1018.7	1028	595.9	19236.5	386.1	1786.2	2670.5	402.8	1630.1	6115.1	439.1	2317.1	255.3	541.5	1070.2	6494.6	7104.4	25316	37598.2	549.4	1359	2998.5	947.9	665.1	632.3	2196.4	831.5	1240.1	243.2	846.8	483.3	18795.5	11593.3	1571.7	1296.6	3960.3
Control 5	557	922.5	11833.5	753.3	1278.4	777.6	1115.5	4753.5	1021.4	812.6	383.2	7392.5	4710	1714.8	1349.1	299.9	2727.7	299.3	1792.3	936.2	451.8	1743.3	2817.6	477.1	1658.1	237.2	336	1271.4	1050.6	14487.9	20283.9	37816	619.7	1597.6	2603.6	821	505.3	410.4	3025.9	1195.9	1281.2	292.5	463.9	417.6	14748.5	7086.9	2124.1	1237.7	1505.6
Control 6	599	687.2	10456.7	875.5	1369	905.5	2214.1	5082.8	936.1	463.5	356.4	5663	5963.1	1449.8	938.3	287.7	4001.9	354.4	1684.2	1326.2	359	1605.9	2530.2	896.2	1353.1	316.3	714.7	880.8	3354.4	1861.4	14118	41282.1	564.9	1055.2	2696.9	777.3	395.1	465.5	4805.1	897.4	1517.7	320.5	515.8	359.5	20219.5	4718.2	1164	1131.6	1672.2
Control 7	670.2	887.6	11470	887.2	1223.7	686.9	1093.2	7627	1637.9	294.3	402.9	7254.1	4615.2	1118.3	2986.5	517.1	3514.9	260.1	1831.3	965.2	321.3	1578.3	3503.4	691.1	1418.5	307	552.2	1197.7	3233.3	7288.5	16299.8	43616	587.4	1333.7	1912.1	1080.3	506	686.1	2937.6	1188.3	1272.9	294.7	548	487.6	15625.2	8377.2	1882.7	1504.8	1622.2
Control 8	760.1	965.6	12387.5	773.7	1585.7	635	1091.1	5270.7	885.2	292.5	340.4	6634.2	4104.6	997.9	1507.3	232.2	2830.9	433.6	2348.5	1101	318.3	1670.6	3031.5	498.2	1857.4	287.4	434.9	1004.3	3048.1	10836.2	13448.6	44259.7	737.3	1711.2	2918.6	985.9	467.4	480.4	2996	1082	1212.8	350.9	490.3	491.8	18145	4033.2	1834.9	1327.3	1693.4
Control 9	750.6	1054.2	13592	728.9	1330.5	1561.7	981.9	4418.4	1051.4	309.1	393.7	8897.8	9005.2	939.1	1091.5	264.3	6432.1	317.5	1864.5	1517.8	260.5	1721.4	3908.5	583.8	1996.4	345.1	373	1173.3	5405.3	8088	21009	35665.5	532.9	1464.9	4023.9	890.6	440.1	322.9	2829.1	985.6	977.7	258.3	504.1	396.6	9289.6	12793.7	1732.1	1196.8	1166.6
Control 10	784.9	880.1	11525.8	4944.9	1124.3	1517.3	1173.1	5832.5	1002.4	6382.3	448.6	9311.6	7433	2991.1	1162.7	236.7	10145.4	345.3	2257	1578.3	298.3	1325.5	2658.9	460.8	2159.7	336.3	549.6	1838.7	3818.2	53147.6	29229.1	55131.3	616.7	1788.8	2121.1	849.9	455.2	1351.2	3462	1346.2	1012.7	304.2	452.3	377.9	17691.9	6650.1	1770.3	1193.7	1514.8
Control 11	712.4	791	9772.8	774.6	1274.4	1462.7	1358.8	5516.5	768	454	572.6	5757.2	4416.2	806.4	1041.9	391.3	3184.8	337	1594	1156	303.8	1321.4	3224.3	604.9	1828.3	396.9	494.2	1398	3066	12373.5	19915	40253.9	693.5	1487.2	2621.9	810.4	559.8	729.2	2346	869.3	1318.9	177.4	384.5	414	22939	3901.9	1078.2	1189.3	1310.8
Control 12	484	1092.3	13864.2	859.5	1220.9	765.5	1128.2	5568.4	791.8	357.6	587.8	5678.1	2919	1245.2	906.5	234.7	2496.4	315.7	1807.4	808.6	197.1	1055.8	2872.9	434.3	1497.9	140.7	1338.2	2036.8	1590	17282.6	16215.4	74033.9	496.8	1568.6	1885.6	891.1	770.7	741.7	2701.6	1139.9	1563.2	428.6	454.9	391.1	16473.4	6751.1	1855.1	1263.2	1720.6
Control 13	525.7	946.9	12775.5	734.6	1482.1	535.1	1200	5531.7	3456.7	281.6	739.9	4609.9	3373.7	1252	1462.2	254	2050.4	442.5	2814.3	1916.1	336.4	2183.5	4426.7	724.7	1092.6	306.5	338.4	2398.4	1728.6	7490.7	11193.6	33448	756.2	1658.2	8409.9	969.6	893.1	520.7	1481.8	1170.3	1330.9	392.8	499.2	457	18835.6	19526.4	1530.2	1174.9	1378.7
Control 14	477.8	925.2	16000.7	955.8	1289	828.4	1012.9	4766.4	921.8	359.2	365.4	7611.9	6505.6	793.2	1024	240.8	3984.8	317	2127.9	1184.8	324.2	1579.5	2292.4	519.4	1353.9	276.5	431.3	1239.9	1914.5	8012.6	20135.3	51574.1	593.8	1562.1	2691	779	490.9	408.2	4224.8	1058	1351	187.1	442.5	423.7	13072.5	4958	1784.1	1195.9	1394.3
Control 15	509.2	1996.8	8636.2	812.3	1240	751.5	1006	6053.7	964.1	326.7	531.6	7433.5	5242.7	1014.1	1112.9	260.4	4491.5	252.8	2073.8	1394.4	273.7	1744.7	2652	705	1356.5	265.2	354.6	1295.9	3485.4	8903.8	13252.3	50557.1	769.1	1501	6614.8	991	477.9	527.1	2016.7	1365.2	1384.3	352.4	596.8	531.1	26660.3	6800.8	2281.2	1306.7	1669.6
Control 16	625.8	849.9	12288.1	584.5	1779.9	807.3	1086.2	5188	944.5	322.6	378.8	6098.8	4297.4	859.7	1255.4	314.1	4009.3	328	1995.2	1304.7	301.8	2796.2	3994.4	559.2	1404.6	241.4	685.5	833.1	3380.8	21648.5	15981.1	40967.8	564.5	1450.1	3113.7	889.7	475.7	370	1642.1	1005.8	1375.1	208	458	495.5	16233.5	3456.9	1520.7	1090.7	1774.9
Control 17	415	715.7	7809.5	354.3	1604.9	1497.7	1772.8	4697	999.3	278.7	248.2	7246.5	6358.9	886.3	734.1	291.5	5776.7	273.1	2988.7	1725.4	334.2	781.2	5617.4	590.8	2571.5	243.6	445.7	999	3366.4	5046.3	28470.1	55980.7	649.4	1606.5	3728.6	983.8	392.6	417	2176.1	919	833.5	142.8	478.2	405.6	16713.1	5143.4	1627.1	636.5	1247.1
Control 18	477.7	906.6	14126.9	600.9	1263.4	701.3	39112.1	5281.9	982.8	300.8	584.6	7379.4	4334.3	1501.9	1119.8	276.7	3627.5	272.4	1698.3	1468.3	263.2	1935.6	4314	528	1417.6	243.6	366.8	1125.7	2962	10945.9	17797.7	31734.6	665.9	1579.3	3544.2	938.9	544.3	400.2	2729.8	1100.1	1139.7	166	440.7	386	16839.9	4120	1367.7	1149.5	1582.9
Control 19	356.9	659.3	8724.4	572.5	1370.6	498.3	1507.5	4674.8	1126.8	294.8	338.2	3982.3	3643.5	1114.6	1202.8	266.8	2074.8	301.6	1984.1	2060	271	1717.7	3126.5	577.6	1176.3	240.5	536.9	2300.7	1860.9	10287.9	14806.2	47843.7	554.9	1368.4	4415.9	1652.7	362.5	446.3	250.7	836.4	697.5	256.7	419.4	400.8	22110.4	19804.9	1358.7	961	1258.2
Control 20	527.8	1067.9	10086.4	740.6	1100.1	749	2099.3	4431.1	2174.9	643.1	593.6	6858.7	4103.7	1113.8	1485.7	430.6	3032.2	243.7	1619	1173.7	229.6	1505.2	4618.8	548.1	1259.9	270.7	295.7	2226.7	2753.8	18076.9	14524.5	32191.7	538.1	2127.1	2546.7	825	864.5	527.3	3330	1092.5	1224.6	516.6	463.5	543.8	9210.1	10039.6	1211.7	1449.2	1495.1
Control 21	2253.5	602.9	8572.4	433.4	948.9	438.1	1030.4	4562	1016.4	374.3	280.7	3951.3	1972.6	1029.7	1476.7	264.6	1269.4	296.4	5200.2	1413	656.9	1516.1	2712.6	589.8	945.7	253.6	411.7	1291.9	881.8	25473	10123.9	49560.9	629.8	1460.2	4137.6	884.2	396.4	298.6	1509.8	1143.8	1306.5	432.5	515.7	386.5	22145.7	12553.7	1149.1	1271.7	1666.9
Control 22	557.3	1914.5	11512.5	1703.1	1170.1	1285.3	996.1	4925.4	1072.1	445.5	618.9	7626.7	5969.7	1223.5	1393.8	562.8	4265.2	473.5	6221.7	2363.1	223.3	2039.1	4577.2	542.3	1980.7	261.5	385.5	2315.5	2428.7	13031	23128.5	40369.7	586.2	1703.6	4007.5	1208.9	424.2	408.6	3897.6	1250.3	1065.2	475.2	491.2	507.6	12235.1	8040.8	1829.4	1989.1	1223.7
Control 23	9895.9	778.6	13616.9	627.8	1044.2	818.5	1057.8	7323.1	1297.1	366.8	421.1	6941.5	5346.7	1956.3	1424.4	318.8	3906.6	244.1	1972.2	5491.1	379	1391.2	5929.7	551.5	1589.6	251.9	377.5	1413.7	2660	9299.7	12207.3	27588.9	594.4	1135.6	4159.8	971.9	463.7	1620.6	5373.4	988.5	1303.8	416.2	555.6	480.9	18541.7	5956	3667.3	1670.1	1515.1
Control 24	478.4	708.6	8353.5	506.7	1039.3	582.2	839	4078.4	1355.6	386.3	367.1	4207.4	3061.2	1234.2	1163.2	388.2	2403.6	215.1	1955.4	1287	502.2	2468.9	4621.8	1974	1433.8	436.4	866.1	1561.1	2110.1	16867	7909.1	32531.3	759.7	2008.2	4090	691.9	414.8	343.6	1386.4	942.5	1031.9	350.3	454	485.3	27964.5	5333.8	1419.5	1141.4	1366.5
Control 25	395.7	957.9	12969.8	881.5	1311.1	733	1263.9	4145.1	936.1	687.8	399.7	5258.7	3593.7	1707.3	1149.2	297.8	2750.2	272	2061.2	2336.3	320.4	1182.3	1757.6	523	1635.8	260.9	455.6	1527.9	1715.2	12307.5	18261	38676.5	2627.2	1664	3385.7	874.2	464.9	400.8	1616.2	1047.8	1099.9	426.8	510.2	611.7	13760.3	4461.7	1299.3	1260.1	1471.8
pre-hypertension 1	415.5	706.7	12906.5	436.8	1280.8	839.1	997.8	4455	803.4	347.3	380.1	6517.7	5214.4	1915.8	1594.4	663.2	3834.6	430.1	1872.5	994.8	252.9	1448.9	2898.4	572.7	1694.5	248	508.4	1693.7	2819.2	15798	14760.8	34419.4	612.1	1683.4	3836	990.9	487.6	361.6	813	1110	1171.3	666.3	536.3	411.1	9107.4	20758.3	1415.2	1196	1306.9
pre-hypertension 2	481.6	862.5	11307.8	901.6	1122.9	697.4	1493.3	5080.5	729.7	253.8	421.6	6065	3407.5	965.1	1291.7	227.8	2961.6	307	1579.7	2094.4	241.7	706.2	1739.3	441.8	1517.2	188.3	286	2100.5	1875.8	5420.8	10505.4	41267.1	535.7	1583	1639.6	1545.5	431.4	328.8	1756.2	1025.2	1188.4	259.2	400.2	422.6	18830.6	4793	1401	1143.6	1297.2
pre-hypertension 3	688.3	883.9	10514.1	704.2	1296.6	1211.1	1016.4	4687.9	1024.9	281.7	352.6	9334.8	8854.7	1208.3	1126.5	271.2	4657.1	291.4	1774.1	3620.7	282.3	1578.9	3779.8	498.6	1951.2	254	446.9	1522.7	3181.3	10775.2	17875.4	51137.2	547.1	1697.1	2507.8	854.7	463.7	381.4	1845.6	799.5	743.6	408.2	456.5	383.3	10185.3	6053.6	1274.7	1192.8	1505.8
pre-hypertension 4	474	1003.9	10481	610.8	1570.4	980.9	1203.6	5432.4	962.9	285	224.9	6906.9	4928.7	1277.9	1464.5	225.8	4416	324.8	2305.3	1431.5	298.1	1709.9	3675.8	573.6	1812.3	306	415.3	1721.7	3089.8	2628.2	16672.5	42548.3	679.5	1573.9	2871.2	1526.9	329.9	393.2	1249.7	948.7	743	386.6	459.1	436.9	15135.4	6354.1	1180.5	1089.6	1354.5
pre-hypertension 5	736.5	774.9	8292.1	466.5	1271.9	1009.7	1991.3	4729.7	916.5	431.2	316.8	7164.7	6240	1201.9	1142.3	268.5	4113.5	291.6	2020	1122.4	361.1	1552.5	3963	658.1	1603	236.7	417	1078	2556.8	12717.5	12945.5	35416.3	635.2	1681.9	3933.9	925.3	486.4	416.5	2394.1	940.2	986.2	334.5	486	348.4	18583.8	4309.6	1550.1	1293.4	1448.6
pre-hypertension 6	600.5	836.7	12840.6	572.4	1210.5	671.1	862.4	7931.4	3294.4	313.8	510.4	6882.7	4846.4	768.7	1742.9	341.1	3769.2	278.8	1833.4	968.4	282	2001.6	2680.5	551.8	1425.8	241.4	387.5	1312.9	3166.3	1993.6	15200.6	49829.8	543.4	1414.1	3899.3	796.2	437.2	388.5	2067.8	1030.2	1490.3	344	474.8	523.5	36800.1	6772.8	1708.8	1116.2	1589.5
pre-hypertension 7	476.3	694.9	9483.9	671.3	895.9	386.8	965.6	3619.1	946.7	306.7	336.9	4565.1	2393.7	1440.4	1168.9	245.9	2563	203.9	1384.9	947.8	245.2	1799	1635.7	471.8	1010.8	220.9	629.2	1386.5	1289.8	10596.9	9926.5	43915.3	498.5	1649.9	3743	786.3	398.7	363.6	2589.9	760	1146.3	286.9	364.9	386.3	22924.5	6216.1	1591.1	1189.7	1259
pre-hypertension 8	424.4	788.6	13235.8	675	1293.4	593.3	1487.6	5124	1919.7	326.7	364.7	5229.6	3780.8	2673.8	1261.6	250.4	2515.6	252.7	1741.6	1653.1	257.2	2301.3	4427.9	466.1	1430.3	288.3	357.7	1996.4	1805.3	13752.3	14606.7	33312.5	643.8	6771.4	8059.1	792.2	428.9	743.3	2065.9	2792.2	1608.8	1401.6	521.7	684.4	25617.7	19609.5	1129.2	4538.8	1364.1
pre-hypertension 9	640.8	924.2	11256	825.2	1624.1	945.4	985.5	20503.5	1806	368.7	386.2	6157.1	3744.5	638.1	1308.7	302.2	15137.6	346.6	2212.4	1050.8	231	1547.2	2978.2	518	1511.3	261.6	316.7	1483.2	2773.7	1586.7	12242.7	45671.7	643.5	2020.2	2825.4	975.9	547.2	445.9	1727.8	1105.4	1235	354.4	476.1	430.5	20996.3	6882.8	1350.6	1274.7	1740.9
pre-hypertension 10	1610.9	871.5	15325	1230.4	1190	5547.5	1095.4	4785.9	929.3	393.8	475.9	19072	44674.9	806.4	780.8	225.1	25830.2	660.9	2554.7	1857.7	169	811.3	4061.7	408.2	6992.3	415.3	217	1191.6	7881.8	8663.6	93322.9	32472.8	1283.1	1166.3	2136.2	586.3	465.8	371.3	3420.6	1183.2	802	292.7	594.9	281.2	9556.8	3396.4	5509.4	1942.3	908.9
pre-hypertension 11	628.6	858.8	11907.9	1159.3	1260.6	1012.6	2698.6	5402.9	989.7	485.9	445.4	9339.2	8356.7	910.7	993.2	259.1	5130.6	319.9	1901.6	2309.5	330.6	2742.9	4031.4	569.9	1511.4	287.9	429.2	969.9	2560.8	8832.1	17333.8	38200.2	592.8	1381.1	5863.8	846.4	452.7	421.8	1715.6	952.3	875	451	550.9	321.4	10562.6	3589.1	2303.2	1227	1446.2
pre-hypertension 12	398.6	1239.4	12294.2	627.2	1358	837.2	966.3	5365	905.3	340.5	296.3	7898.9	6411.2	793.2	1394	254	4770.2	300	2179.2	3816.7	398.2	1827.2	5038.7	542	1710	246.3	289.9	1537.1	2344.2	13579.6	21197.5	41431.7	567.8	1689.4	2715	847	610.5	377.6	2273.3	1327.1	1375.1	255	440.9	524.2	32680.5	3920.8	2406.4	941.1	1499.6
pre-hypertension 13	499.5	692	5965.7	853.2	1430.1	803.4	844.4	5694.1	1074.2	434.2	394.7	4722.5	3270.5	1686	1081.5	346.5	4525.2	283.5	1885	1214.8	653.2	11147.4	5335	484.3	1448.6	449.2	402.7	1262.9	2431.4	19987.3	14591	59535.1	585.5	1509.6	2075.8	782	1319.9	944.1	1860.8	1091.4	1065	303.1	697.8	469	9487.5	8725.4	1333.2	1149.5	1246.3
pre-hypertension 14	552.3	716.4	13688.9	568.9	1397	603.3	7799.8	4834.7	971.4	1242.6	334.5	5607.8	4170.7	1488.3	1330.2	198.1	2963.1	257.2	2014.1	1059.8	285.5	1711.9	3395.9	503.4	1432	258.6	362.1	1471.8	3038.7	4965.3	13477.2	33008.1	580.2	1614.6	5175.3	905.1	534	953.6	532.1	763.2	1540.5	301.3	441.5	340.9	22396.9	6438.7	1340.1	1255.5	1190.4
pre-hypertension 15	499.5	727.5	12462.9	748.2	1424	731.8	950.1	5657	1170	319	354.8	7588	3562.4	1644.1	1587	266.1	3107.5	6149.2	1790.2	6633.4	312.2	1178.2	2926.9	579.8	1596.3	297.6	322.9	1419.6	2726	9078.2	15532.2	39689.9	630.8	1327.3	3127	945.4	419	466.9	1377.1	887.6	1821.9	341.7	389.4	421.6	22780.2	6398.2	1295.2	1382.2	917.1
pre-hypertension 16	796	907.3	17334.2	664.2	1243.1	1613.7	1019.6	5087.6	918.1	319	340.8	14704.1	13327.7	729.2	1047.2	233.4	9569.5	334.2	2025.8	1207.6	254.1	2015.3	4094.1	542.6	2553.7	362.5	349.5	1099.2	7358.3	9824.3	28784.9	52954.2	551.2	1522.6	2436.9	716.8	442.2	363.8	2517.8	896.9	1173.1	284.4	548.6	254.9	27600.1	5673.1	1941.6	1377.4	1399.7
pre-hypertension 17	549.3	839.3	18537.4	704	1185.9	1353	893.9	4779.2	854.7	396.8	233.8	9404.5	8872.6	789.6	1284.8	281.3	4481.2	296	2110.9	1171.5	286.4	1487.1	4442.5	516.8	2045.8	265.8	420	1462.5	5694.8	26761.2	20993.9	42039.1	633.6	1231.5	3328.5	641.5	366.6	350.7	1864.9	950.8	1219.1	360.1	452.2	409.2	17799	8343.4	1581.5	1062.2	1579.5
pre-hypertension 18	456.4	915.9	8750.9	547.2	1325.8	483.7	1184.9	5640.3	1037.6	284.1	325.8	5980.2	2537.7	1161.4	1080.6	250.4	2388.6	248.4	2019.9	1802	264.7	2719.8	3244.5	575.6	1153.9	388.6	329.3	1452.7	1551.4	24803	13609	39387.5	607.4	1793.3	5847.1	1271.7	427.7	476.2	1589.2	861.1	1264	244.4	409.6	457.7	31035.5	14415.6	1278.1	989.1	1382
pre-hypertension 19	584.6	1067.1	12554.1	634.2	1493.1	548.1	1195.7	5276.4	1279.8	330.2	351.9	5471.7	3040	1653.2	1427.9	439.9	4684.4	269.4	1933	2502.2	263.6	1984.1	2698.5	618.4	1500.9	267.6	348.4	1274	2824.1	11459.3	14015.3	34227.5	574	1269.4	4365	936.7	345	519.3	2100.9	1198.3	708.9	443.6	472.9	470.1	11361.2	7838	1206.7	1403.9	1448.8
pre-hypertension 20	598.1	804.6	14263.5	794	1300.5	1443.9	1382.3	5583	1055.3	375.9	264	10827.2	9723.8	931.9	1434.2	302.2	5442.2	380.5	2270.2	1376.8	429.1	553.9	2753.7	566.3	1905.5	261.3	445.2	953.1	3649	9766.2	24780	43699.1	592.3	899.3	2202.5	793.9	409.6	362.3	2585	1036.2	997.3	212.8	449.7	620.6	24351.3	14922	2345.1	1131.7	1106.4
pre-hypertension 21	939.7	720.9	15269.1	480	1198.5	1870.3	907	4887	1001.9	309.7	391.2	14780	14195.8	1306.4	1627.4	295.2	4233.8	360.2	1738.1	1913	255.2	1852.9	4754.3	537.4	2407.6	262	356.3	1067	5263.2	33132.4	37196.5	41281.3	531.4	1328.9	2305.1	752.7	409.3	624.1	2395.6	702.1	2250	445.1	662.5	485.6	16786.7	15086.4	2786.5	955.5	877.7
pre-hypertension 22	598.4	740.5	14135.8	842.9	1288.7	704.9	978	4168.1	1170.9	441.8	361.4	6040	4215.5	1757.5	960.8	263	2745.9	266.5	1592.8	1015.4	306.3	1563.3	4218.2	533	1496.7	195.1	365.9	1694.4	3109.2	3946.9	13031	40296.5	525.2	1746.5	3596.4	685.3	481.2	3401.1	1417.6	935.9	1127.9	315.7	501.1	387.4	25884.4	6269.8	19301.2	1512.2	1384.8
pre-hypertension 23	635.5	647.6	14065.6	575.8	1418.4	1161.3	1328.5	5360.9	978.4	430.3	345.4	9617.3	9973.9	1141.4	1005.3	231.9	5636.3	319.5	2060.5	1180.2	274	959.7	3262.9	529.5	1966.1	255.7	314.1	1223.5	5331.9	2312.3	25609.9	35559	606.6	1356.2	2255	979.7	400.8	344.8	3129.6	1023.3	922.1	362.8	435.7	449.1	17484.3	6798.2	2110.9	1397.2	1509.7
pre-hypertension 24	983.4	1171.2	15782.9	912	1062.4	1997.9	1501.8	7251.3	1146	5393.5	405.8	15097	12159.4	687.1	1065.3	300.2	10367	350.9	1705.9	934.2	275.6	960.9	6220.2	531.6	2651.9	235.9	434.4	1319	6897	19484.2	26074.6	38610.3	604	1661.1	2932.9	907.5	581.4	655.2	2996.6	1076.2	1301.9	294.4	491.5	400.9	15725.6	5474.5	2946.9	2261.3	1310.5
Hypertension 1	529.5	890.7	14172	908.7	1077.8	966	134944	5179.8	1079.2	289.6	377	7716.3	5637.9	992.9	1064.9	244.8	4074.6	285.9	1754.8	4994.7	480.9	2447.5	2814.9	805.6	1396.6	257.3	288.7	1256.3	2948.6	6064	25573.3	36060.2	573.4	1761.1	4383	1091.1	499.5	402	2685.7	1065.1	1229	469.7	440.5	388.2	35888.4	5116.3	1723.5	1126.7	1277.8
Hypertension 2	538.9	800.4	9847.3	467.3	1304.7	766.4	7998.5	4801.9	1822.1	661.1	387.8	5182.6	4195.8	1109.1	1210.8	291.6	2704	379.3	2028.4	959.1	421.6	524.2	4604.8	509.6	1214.9	218.7	366.5	949.3	1760.4	21236.8	15129.7	57361.9	573	1117.2	1725.9	942.4	734.7	385.4	2422.3	981.5	1286.5	304.6	484.6	537.1	21980.8	6256.8	2515.1	1016.8	1498.2
Hypertension 3	441.1	352.3	9851.4	598.2	1123	1346.1	874.5	4205.5	680	285.7	342.5	8274.5	6217.4	1466.4	5617.3	230.1	3508.4	335.6	2100.6	6890.3	286	1342.7	3159	808.1	1845.3	253.1	357.7	913	4065.1	12058.3	21174.4	19968.2	472.4	1168.8	2752.8	616.3	369.2	203.8	555.4	977.1	836.1	377.2	323.3	415.2	22213	5573.4	2109.6	1215.7	846
Hypertension 4	733.2	810.4	11233.8	1102	1159.9	1195.8	1027	5459.6	942.8	319	398.5	9492.4	7478.6	1244.3	1047	306.3	7026.8	304.8	1921.8	880.7	295.3	1825.5	1473.8	540.8	1768.2	219.8	477.4	998.9	4752.5	10230.6	25389	19794.8	770.4	1446.3	3012.9	815.6	406.8	2379.3	2729	1161.5	1338.5	190.2	767.6	381.7	25766.9	4516.1	1534.7	1079	1447.4
Hypertension 5	910.3	830.8	29530.8	1305.3	1177.2	1045.2	958.2	5985.9	934.6	287	366.5	13235.9	9185.4	1044	1082.9	382.7	6313	280	1813.2	858.1	270.3	1465	2928.4	502.7	1754	271.4	291.8	1483.2	4940.8	9747.8	30992.3	33419.4	516	1564.5	3734.9	868	535.1	486.3	3062.5	1318.5	1043.7	442.6	409.5	375	18272.8	7519.5	1782.5	1187.3	1192.8
Hypertension 6	1214.1	962.8	13588.6	1025.7	1123.7	2412.7	958.3	4997.6	992.1	421.5	397.3	16863.5	19999.9	853.3	1036.3	294.2	10422	426	1927.4	3393.5	241.2	1214.4	3100.9	658.1	3109.8	284.1	335.3	1246.6	6920.6	13276.6	34360.1	28985.1	570.6	1582.3	2999.9	769.4	495	364	2674.3	767.8	1025	334.8	638.1	446.8	13292.9	8644.5	3057.2	1498.4	1657.9
Hypertension 7	978.3	994.8	13692.2	789.8	1033.9	1890.1	1110.8	5750.6	902.5	335.8	388.3	12825.8	9041.4	1766.2	1132.8	202.6	8428.9	286.8	1790.9	834.2	261.8	2417.7	5505.4	921.5	1930.9	279.7	313.5	930.6	3557.8	8009.1	26613.8	37385.1	551.9	1588.8	4135.8	826	407.1	1017.7	3133.7	943.4	1027	313.4	484.7	448	39921	9360	2580.5	1279.9	1233.2
Hypertension 8	628.7	973.4	8933.5	833.4	1381.1	1093.2	1242	5000.6	1146.6	291.9	298.1	9076.3	6128.2	955	1429.3	251.2	4709.9	310.8	2047.7	981.4	302.3	2006.5	2621.9	561.1	1668.7	288.3	366	1345.9	4034.9	4947.3	15301.1	51049.8	609.3	1724.5	3570.7	909	426.4	435	2241	1066.2	1416.8	275.8	512.5	417.6	40298.6	6880.6	1575	1334.1	1633.2
Hypertension 9	705.3	750.9	13808.5	701.2	1297.8	1688.5	1117.5	5750.1	867.5	455.4	369.8	14025.8	13340.7	630.4	1020.6	263	7252	364.6	1934.5	2946.6	226.8	1212.4	4033.2	466	2151.2	242.4	327.8	923.5	3374.2	9249.3	29864.4	30213	531.3	1392.4	2099.9	774.7	403.5	392.5	2425.6	1033	1067.9	293.7	462.5	317.5	14932.5	4248.3	2717.8	1201	1400.5
Hypertension 10	1070	1145.9	13907.2	781	1303.2	1095.2	1071	6235.3	1272.9	325.6	421.3	10427.3	7689.1	1509.4	1105.2	273.1	4924.9	365.3	1728.3	1364	292.2	2066.5	7094.7	528.9	1671.7	294.4	370.2	1310.9	2434.8	14225.4	20985.4	24940.6	646.5	1612.2	3456.5	926.2	498.3	485.8	2462.6	981	1318.3	312.7	465.9	359.8	16944.7	3670.9	1934	1198	1445.2
Hypertension 11	914.7	961.3	16013.8	876.3	1313	1829.6	958.8	4850	981.2	727.9	354.1	17128.2	16164.8	998.5	1251.4	216	9418.3	370.8	1932.3	936.8	592.5	1564.3	5214.6	505	2636.6	326.9	276	1311.1	6539.4	11493.5	28988.7	29279.3	594.5	1240	2808.9	955.1	448.9	472.2	2105.9	995.7	1312.5	338.9	548.8	337.2	16969.6	14520	3164.1	1229.7	1064.8
Hypertension 12	682.7	617.4	7980.1	722	936.4	2189.6	1302	6022.7	725.3	241.7	356.2	12374.9	17905.4	530.4	965.9	317.4	9471.3	446.4	1604.6	3953	248.4	1796.5	2170.6	528.8	2398.2	274.9	286.6	854.4	4340.4	29016.3	29768.8	20755	542.4	1712.5	3273.5	732.8	469.9	384	2821.7	1247.6	1206.9	382.7	245.8	333.8	21304	2687.4	2278.8	1677.9	790
Hypertension 13	626.5	831	6039.3	590	1193.2	2852.3	887.1	4674.3	762.8	798.8	442.9	13872.9	15626.8	872.6	841	318.9	9045.5	413.1	2009.3	1159.1	453.9	1246.3	3718.4	618.7	2678.8	337.8	378.3	1051.2	1638.5	2424.4	36124	28062	714.5	1026.3	2622	794.7	492.8	463.3	2961.4	945.1	1161.1	156.4	406.2	337.1	15941.1	3004.8	2313.1	1437.2	708.7
Hypertension 14	621.7	1019.6	9008.5	729.3	1102.2	1039.4	1000.6	7449.8	911.9	368.6	526.1	8753	6233.9	781.7	962	248.7	5418.4	313.5	4536.5	1058.7	285.9	1542.1	4182.6	509.6	1688.6	272.8	2470.4	1060.4	1920.9	3118.1	18645.5	28773.4	529.8	1796.6	2080.1	812.6	458.5	769.2	2831.1	828.1	994.9	201.6	428.7	411	22784.3	4528.8	8950.6	1055.3	1213.6
Hypertension 15	974.3	589.2	11972.4	516.8	1227.4	3453.1	1193.5	5529.5	793.7	305.4	343.6	17905.8	24972.5	647	789.2	248	15255.4	501.7	2310.4	1267.7	232.6	1195.1	4500.6	467.8	3805.2	241.4	333.2	970.5	7769.6	19940.2	52209.5	26878.4	561.2	1380.6	3196.6	688	418.9	284	2365	968.4	985.6	465	448.1	733.7	14657.9	3651.6	4222.8	1504.7	1338.2
Hypertension 16	956	950.8	10714.4	769.2	1051.7	4350.4	1034.2	5519.4	2653	325.5	354.3	18937.7	24405.9	890.8	935.1	224.6	33593.9	720.8	2556.8	1354.4	246.8	1348.5	3618.2	565.9	4764.8	233.1	363.4	1064.2	9656.5	38636	54628.9	47326.2	589.1	1182.1	2148.3	705.5	1030.8	825.4	3705.9	763.5	1290.8	219.1	463	252.2	26918	5934.1	2869.1	1314.1	1279
Hypertension 17	708.1	1029.1	8027	727.2	993.2	2392	927.3	5892.9	1020.6	384.1	361.2	13816.8	14386.2	969.4	893.1	226.8	8597.5	386.4	1645	1521.5	206.9	3315.8	6166.4	433.8	2853.6	266.4	368.6	825.7	5641.7	6246.6	20880	53008.4	477.4	1254.4	2652.4	746.5	645.1	608.6	2330.7	718.2	909.3	297.7	549.5	358.4	14290.5	3136.7	2279.4	1389.6	1421.2
[truncated: 1,256 more columns]

## Sheet: Protein_Annotation
SeqId	SomaId	TargetFullName	Target	UniProt	EntrezGeneID	EntrezGeneSymbol	Organism	Units	Type	Dilution	PlateScale_Reference	CalReference	Cal_Set_017	ColCheck	Cal_Set_016	Cal_Set_015	Cal_Set_014	Cal_Set_013	Cal_Set_012	Cal_Set_011	Cal_Set_010	Cal_Set_009	Cal_Set_008	Cal_Set_007	Cal_Set_006	Cal_Set_005	Cal_Set_004	Cal_Set_003	Cal_Set_002
10336-3_3	SL019100	E3 ubiquitin-protein ligase CHIP	CHIP	Q9UNE7	10273	STUB1	Human	RFU	Protein	40	2280	2280	1.41	FLAG	1.489	1.405	1.279	1.212	1.051	1.12	0.999	1.037	1.269	1.106	1.278	1.555	1.617	1.264	1.308
10337-83_3	SL007136	CCAAT/enhancer-binding protein beta	CEBPB	P17676	1051	CEBPB	Human	RFU	Protein	40	801.8	801.8	2.789	FLAG	4.033	2.211	2.314	1.515	1.446	2.142	1.364	1.52	1.957	1.401	1.714	2.539	2.715	1.638	2.246
10339-48_3	SL001731	Gamma-enolase	NSE	P09104	2026	ENO2	Human	RFU	Protein	40	15655.2	15655.2	0.651	FLAG	0.712	0.594	0.574	0.587	0.506	0.573	0.527	0.527	0.56	0.501	0.584	0.602	0.718	0.576	0.534
10342-55_3	SL019096	E3 SUMO-protein ligase PIAS4	PIAS4	Q8N2W9	51588	PIAS4	Human	RFU	Protein	40	637.05	637.05	2.973	FLAG	4.121	2.477	2.551	1.742	1.799	2.625	1.99	1.762	2.301	1.603	2.31	2.668	3.697	1.486	2.871
10344-334_3	SL005173	Interleukin-10 receptor subunit alpha	IL-10 Ra	Q13651	3587	IL10RA	Human	RFU	Protein	1	1278.7	1278.7	1.151	PASS	1.001	1.245	1.034	1.232	0.947	1.03	1.072	0.987	0.992	1.027	1.344	0.954	1.256	1.119	0.933
10346-5_3	SL007221	Signal transducer and activator of transcription 3	STAT3	P40763	6774	STAT3	Human	RFU	Protein	1	744.35	744.35	1.124	PASS	1.244	1.071	1.107	1.116	1.102	1.052	1.088	1.143	1.174	1.139	1.109	1.113	1.127	1.149	1.095
10351-51_3	SL007108	Interferon regulatory factor 1	IRF1	P10914	3659	IRF1	Human	RFU	Protein	40	1099.5	1099.5	0.938	PASS	0.903	1.008	0.969	1.005	0.977	0.883	1.017	0.969	0.93	1.003	1.01	1.038	0.971	1.011	0.932
10356-21_3	SL000455	Transcription factor AP-1	c-Jun	P05412	3725	JUN	Human	RFU	Protein	40	5008.75	5008.75	5.777	FLAG	6.361	5.279	5.389	4.521	2.647	2.612	3.788	3.818	4.123	3.481	5.129	4.315	6.16	5.273	5.583
10358-33_3	SL003755	Induced myeloid leukemia cell differentiation protein Mcl-1	Mcl-1	Q07820	4170	MCL1	Human	RFU	Protein	40	1085.6	1085.6	0.893	PASS	0.945	0.971	1.041	1.054	0.985	0.921	1.033	0.971	0.911	1.028	1.009	1.026	0.855	1.027	0.99
10361-25_3	SL014684	2'-5'-oligoadenylate synthase 1	OAS1	P00973	4938	OAS1	Human	RFU	Protein	40	750.4	750.4	0.791	PASS	0.837	0.864	0.896	0.94	1.006	0.928	1.003	0.96	0.918	0.992	0.909	0.946	0.779	0.915	0.909
10362-35_3	SL002565	Myc proto-oncogene protein	c-Myc	P01106	4609	MYC	Human	RFU	Protein	40	394.65	394.65	0.917	PASS	0.951	0.943	1.049	0.995	1.037	0.967	0.957	1.028	0.963	0.976	0.929	1.352	0.936	0.997	1.051
10363-13_3	SL004097	Mothers against decapentaplegic homolog 3	SMAD3	P84022	4088	SMAD3	Human	RFU	Protein	40	6986.35	6986.35	1.355	FLAG	1.523	1.248	1.332	1.221	1.007	1.108	1.047	1.056	1.316	1.111	1.223	1.438	1.57	1.289	1.589
10364-6_3	SL004101	Mothers against decapentaplegic homolog 2	SMAD2	Q15796	4087	SMAD2	Human	RFU	Protein	40	4816.85	4816.85	1.118	PASS	1.067	1.091	0.998	1.128	1.049	1.024	1.038	1.069	1.074	1.112	1.083	0.987	1.105	1.11	1
10365-132_3	SL005184	Interleukin-23	IL-23	P29460; Q9NPF7	3593 51561	IL12B IL23A	Human	RFU	Protein	40	1123.5	1123.5	0.806	PASS	0.768	0.822	0.775	0.792	0.771	0.783	0.806	0.807	0.778	0.793	0.797	0.78	0.825	0.798	0.79
10366-11_3	SL001728	Platelet-derived growth factor receptor alpha	PDGFRA	P16234	5156	PDGFRA	Human	RFU	Protein	40	1330.95	1330.95	0.649	FLAG	0.613	0.676	0.626	0.695	0.65	0.664	0.706	0.634	0.655	0.654	0.68	0.575	0.694	0.64	0.682
10367-62_3	SL001716	Interleukin-12	IL-12	P29459; P29460	3592 3593	IL12A IL12B	Human	RFU	Protein	40	329.2	329.2	0.988	PASS	1.052	1.075	1.216	1.166	1.226	1.125	1.152	1.179	1.103	1.182	1.096	1.204	0.953	1.167	1.111
10370-21_3	SL004396	Signal transducer and activator of transcription 1-alpha/beta	STAT1	P42224	6772	STAT1	Human	RFU	Protein	40	3999.3	3999.3	2.886	FLAG	3.192	2.078	2.028	1.898	1.816	1.941	1.619	1.944	2.58	1.963	1.978	2.671	2.745	2.135	2.693
10372-18_3	SL007229	Signal transducer and activator of transcription 6	STAT6	P42226	6778	STAT6	Human	RFU	Protein	1	353.65	353.65	1.061	PASS	0.924	1.066	0.974	1.037	0.964	0.966	0.941	0.977	1.014	0.959	1.091	0.961	1.095	1.042	0.983
10990-21_3	SL017128	Leucine-rich repeat serine/threonine-protein kinase 2	LRRK2	Q5S007		LRRK2	Human	RFU	Protein	1	1848.2	1848.2	1.044	PASS	0.915	1.211	0.921	1.123	1.016	1.081	1.047	1.028	0.987	1.042	1.254	0.939	1.146	1.065	0.818
11067-13_3	SL001791	Osteocalcin	Osteocalcin	P02818	632	BGLAP	Human	RFU	Protein	1	1870.05	1870.05	1.051	PASS	0.982	1.048	1.01	1.044	0.928	0.948	0.972	0.914	0.985	0.96	1.094	0.923	1.051	1.028	1.015
11071-1_3	SL000481	Interleukin-5	IL-5	P05113	3567	IL5	Human	RFU	Protein	40	860.75	860.75	0.819	PASS	0.943	0.847	0.887	0.886	0.946	0.901	0.923	0.952	0.919	0.938	0.865	0.898	0.801	0.875	0.954
11081-1_3	SL007151	Glycerol-3-phosphate dehydrogenase [NAD(+)]; cytoplasmic	GPDA	P21695	2819	GPD1	Human	RFU	Protein	40	1510.15	1510.15	1.157	FLAG	1.664	0.995	0.943	0.855	0.73	0.772	0.778	0.731	0.844	0.753	0.95	1.682	1.254	0.805	1.078
11089-7_3	SL000459	Immunoglobulin A	IgA	P01876 P01877	3493 3494	IGHA1 IGHA2	Human	RFU	Protein	0.005	3445.05	3445.05	1.098	PASS	1.08	1.06	1.106	1.116	1.123	1.023	1.036	1.044	1.079	1.074	1.139	1.005	1.013	1.115	1.164
11094-104_3	SL007361	Galectin-10	LPPL	Q05315	1178	CLC	Human	RFU	Protein	40	650.6	650.6	0.764	PASS	0.786	0.897	0.929	0.965	0.998	0.901	0.985	0.987	0.865	0.994	0.923	0.9	0.751	0.943	0.866
11096-57_3	SL018921	HemK methyltransferase family member 2	HEMK2	Q9Y5N5	29104	N6AMT1	Human	RFU	Protein	1	1401.45	1401.45	1.032	PASS	0.953	1.044	0.891	1.05	0.959	0.891	0.965	0.939	0.917	0.98	1.137	0.876	1.023	1.014	0.873
11098-1_3	SL007953	Pyridoxal kinase	PDXK	O00764	8566	PDXK	Human	RFU	Protein	40	283.15	283.15	0.441	FLAG	0.475	0.53	0.54	0.577	0.604	0.55	0.6	0.566	0.549	0.547	0.532	0.488	0.501	0.526	0.509
11101-18_3	SL004489	Toll-like receptor 4	TLR4	O00206	7099	TLR4	Human	RFU	Protein	40	437.15	437.15	1.11	PASS	1.084	1.139	1.196	1.197	1.118	1.104	1.192	1.157	1.081	1.14	1.195	1.147	1.051	1.204	1.176
11102-22_3	SL012561	Regenerating islet-derived protein 4	REG4	Q9BYZ8	83998	REG4	Human	RFU	Protein	1	1592.45	1592.45	0.883	PASS	1.271	0.816	1.014	0.798	0.888	0.912	0.927	0.91	1.129	0.836	0.778	1.298	1.08	0.813	1.24
11103-24_3	SL000448	Heat shock protein beta-1	HSP 27	P04792	3315	HSPB1	Human	RFU	Protein	40	2733.55	2733.55	0.826	PASS	0.856	0.762	0.703	0.713	0.661	0.676	0.682	0.692	0.787	0.685	0.726	0.69	0.761	0.699	0.777
11104-13_3	SL003340	Chitinase-3-like protein 1	YKL-40	P36222	1116	CHI3L1	Human	RFU	Protein	1	10645.2	10645.2	1.163	PASS	1.103	1.028	1.14	1.045	1.004	0.999	0.933	1.012	1.134	1.005	1.04	1.049	1.172	1.104	1.139
11105-171_3	SL003650	Alpha-enolase	Alpha enolase	P06733	2023	ENO1	Human	RFU	Protein	1	14176.5	14176.5	1.246	FLAG	1.427	1.26	1.102	1.328	1.372	1.304	1.225	1.161	1.343	1.393	1.367	1.284	1.292	1.345	1.111
11510-31_3	SL005699	Apolipoprotein L1	Apo L1	O14791	8542	APOL1	Human	RFU	Protein	0.005	42869.8	42869.8	2.117	FLAG	1.982	1.359	1.556	1.351	1.339	1.501	1.149	1.203	1.832	1.218	1.37	2.032	1.757	1.396	1.575
11513-92_3	SL002722	ADP-ribosyl cyclase/cyclic ADP-ribose hydrolase 1	CD38	P28907	952	CD38	Human	RFU	Protein	40	576.2	576.2	1.051	PASS	1.047	1.187	1.237	1.194	1.204	1.168	1.193	1.201	1.118	1.23	1.202	1.206	1.067	1.194	1.083
11514-196_3	SL004557	CD59 glycoprotein	CD59	P13987	966	CD59	Human	RFU	Protein	1	1572.8	1572.8	1.159	PASS	1.215	1.016	1.282	1.016	0.979	0.985	1.15	1.027	1.036	0.894	1.136	1.109	0.859	1.036	1.14
11516-7_3	SL006131	Fatty acid-binding protein; liver	FABPL	P07148	2168	FABP1	Human	RFU	Protein	40	3111.3	3111.3	0.905	PASS	0.922	0.894	0.929	0.782	0.792	0.852	0.949	0.883	0.904	0.867	0.851	0.854	0.884	0.913	0.966
12060-28_3	SL004345	Growth/differentiation factor 11	GDF-11	O95390	10220	GDF11	Human	RFU	Protein	40	820.2	820.2	1.034	PASS	0.951	1.151	1.085	1.13	0.988	1.046	1.054	1.022	0.98	1.038	1.155	1.025	1.105	1.093	0.956
13088-397_3	SL000137	Betacellulin	BTC	P35070	685	BTC	Human	RFU	Protein	40	472.9	472.9	0.879	PASS	1.309	0.945	1.027	0.988	1.134	1.131	1.041	1.092	1.051	1.057	0.964	1.337	0.913	1.008	1.016
13089-6_3	SL003349	Hypoxia-inducible factor 1-alpha	HIF-1a	Q16665	3091	HIF1A	Human	RFU	Protein	40	451.2	451.2	1.699	FLAG	1.747	1.44	1.455	1.246	1.211	1.515	1.216	1.191	1.455	1.238	1.382	1.786	1.763	1.338	1.57
13090-17_3	SL004827	Protein S100-A6	S100A6	P06703	6277	S100A6	Human	RFU	Protein	1	1885.15	1885.15	1.996	FLAG	3.743	1.358	1.991	1.094	1.283	1.677	1.288	1.079	1.791	1.041	1.266	1.503	2.027	1.114	1.71
13093-6_3	SL005430	Secreted and transmembrane protein 1	SECTM1	Q8WVN6	6398	SECTM1	Human	RFU	Protein	1	965.9	965.9	1.324	FLAG	1.475	1.191	1.122	1.133	1.134	1.148	1.112	1.042	1.096	1.038	1.224	1.107	1.484	1.11	1.246
13094-75_3	SL018509	R-spondin-3	RSPO3	Q9BXY4	84870	RSPO3	Human	RFU	Protein	40	1178.65	1178.65	0.841	PASS	1.2	0.882	1.225	0.851	0.84	0.939	0.836	0.911	0.887	0.88	0.845	1.213	1.038	0.892	1.289
13095-51_3	SL005357	Lithostathine-1-alpha	PSP	P05451	5967	REG1A	Human	RFU	Protein	0.005	374.2	374.2	1.049	FLAG	1.17	0.986	1.144	1.02	0.971	0.984	0.933	0.929	1.006	0.906	1.002	1.172	0.964	1.08	1.572
13097-11_3	SL003774	Bcl-2-like protein 2	Apoptosis regulator Bcl-W	Q92843	599	BCL2L2	Human	RFU	Protein	40	445.55	445.55	0.839	PASS	0.854	0.891	0.851	0.835	0.762	0.811	0.814	0.79	0.828	0.791	0.864	0.81	0.877	0.845	0.804
13098-93_3	SL003320	Vascular endothelial growth factor D	VEGF-D	O43915	2277	FIGF	Human	RFU	Protein	1	466	466	1.023	PASS	1.058	1.065	1.017	1.011	1.084	1.04	1.05	1.12	1.028	1.116	1.051	0.977	0.955	1.073	1
13101-60_3	SL007631	Sclerostin	SOST	Q9BQB4	50964	SOST	Human	RFU	Protein	40	18628	18628	2.952	FLAG	2.864	2.811	2.938	2.645	2.913	3.013	2.925	3.033	3.211	3.206	2.777	2.757	2.48	3.168	3.425
13102-1_3	SL012769	Protein FAM3D	FAM3D	Q96BQ1	131177	FAM3D	Human	RFU	Protein	40	7379.35	7379.35	0.961	PASS	0.889	0.944	0.887	0.94	0.913	0.907	1.083	0.901	0.988	0.964	1.007	0.829	0.992	0.9	0.933
13103-125_3	SL009328	Chorionic somatomammotropin hormone	CSH	P0DML2 P0DML3	1442 1443	CSH1 CSH2	Human	RFU	Protein	40	1418.35	1418.35	1.118	FLAG	1.414	0.948	0.829	0.871	0.79	0.853	0.879	0.796	1.243	0.773	0.948	1.512	1.429	0.856	1.054
13104-32_3	SL008614	Ephrin-B1	EFNB1	P98172	1947	EFNB1	Human	RFU	Protein	1	1256.25	1256.25	0.959	PASS	0.965	0.84	0.908	0.789	0.828	0.871	0.863	0.843	0.87	0.791	0.817	1.171	1.119	0.816	1.068
13105-7_3	SL007311	Synaptosomal-associated protein 25	SNP25	P60880	6616	SNAP25	Human	RFU	Protein	40	1450.65	1450.65	1.894	FLAG	2.038	1.692	1.354	1.514	0.972	1.366	1.448	1.28	1.351	0.995	1.696	1.763	1.972	1.519	1.007
13107-9_3	SL008402	Ly6/PLAUR domain-containing protein 3	LYPD3	O95274	27076	LYPD3	Human	RFU	Protein	40	1285.65	1285.65	1.319	FLAG	1.685	0.992	0.972	0.881	0.801	0.928	0.918	0.837	1.011	0.849	0.951	1.37	1.443	0.874	1.135
13109-82_3	SL008810	Neuronal growth regulator 1	NEGR1	Q7Z3B1	257194	NEGR1	Human	RFU	Protein	1	4141.5	4141.5	0.792	PASS	0.828	0.818	0.79	0.783	0.893	0.914	0.949	0.899	0.887	0.898	0.824	0.73	0.773	0.859	0.799
13111-79_3	SL007223	B-cell lymphoma 6 protein	BCL6	P41182	604	BCL6	Human	RFU	Protein	40	2212.9	2212.9	0.983	PASS	0.963	0.96	0.944	0.728	0.88	0.943	0.889	0.953	1.182	0.911	1.035	1.125	1.224	0.984	0.943
13112-179_3	SL009349	Follistatin-related protein 1	FSTL1	Q12841	11167	FSTL1	Human	RFU	Protein	1	28788.8	28788.8	1	PASS	0.911	0.901	1.045	0.916	0.957	0.97	0.897	0.934	0.984	0.872	0.884	0.908	0.905	0.927	1.054
13113-7_3	SL002688	Osteopontin	Osteopontin	P10451	6696	SPP1	Human	RFU	Protein	40	4164.65	4164.65	0.479	FLAG	0.624	0.496	0.506	0.44	0.417	0.54	0.462	0.436	0.464	0.411	0.447	0.45	0.66	0.397	0.558
13114-50_3	SL006230	Lumican	Lumican	P51884	4060	LUM	Human	RFU	Protein	0.005	1267.7	1267.7	0.952	PASS	0.951	0.896	0.77	0.835	1.048	1.013	1.096	0.851	0.914	0.984	0.891	0.819	0.886	0.802	0.792
13116-25_3	SL008931	CD177 antigen	CD177	Q8N6Q3	57126	CD177	Human	RFU	Protein	1	1151.55	1151.55	2.045	FLAG	2.016	1.171	1.821	1.029	1.182	1.768	1.09	1.058	1.826	1.121	1.204	1.628	1.971	1.125	2.106
13117-232_3	SL018256	Choline/ethanolamine kinase	CHKB	Q9Y259	1120	CHKB	Human	RFU	Protein	1	2335.05	2335.05	1.572	FLAG	1.733	1.484	1.136	1.419	1.277	1.356	1.3	1.131	1.563	1.281	1.707	1.57	1.824	1.326	1.38
13118-5_3	SL011888	SPARC-related modular calcium-binding protein 1	SMOC1	Q9H4F8	64093	SMOC1	Human	RFU	Protein	1	2677.3	2677.3	1.052	PASS	1.106	0.998	1.114	1.038	0.929	0.965	0.898	0.968	0.986	0.927	1.01	1.176	1.29	1.06	1.332
13119-26_3	SL004467	Protein Z-dependent protease inhibitor	protein Z inhibitor	Q9UK55	51156	SERPINA10	Human	RFU	Protein	1	4965.7	4965.7	1.069	PASS	1.027	1.083	0.966	1.045	1.203	1.157	1.154	1.08	1.173	1.202	1.107	0.888	1.095	1.032	0.941
13122-19_3	SL008360	Leucine-rich repeat transmembrane protein FLRT2	FLRT2	O43155	23768	FLRT2	Human	RFU	Protein	40	16865.5	16865.5	0.896	PASS	1.15	0.886	0.973	0.838	0.792	0.868	0.82	0.815	0.903	0.771	0.812	1.254	1.061	0.848	1.098
13123-3_3	SL008372	Leucine-rich repeat transmembrane protein FLRT3	FLRT3	Q9NZU0	23767	FLRT3	Human	RFU	Protein	40	3984.7	3984.7	0.968	PASS	1.079	0.729	0.801	0.69	0.648	0.778	0.615	0.653	0.94	0.642	0.687	0.933	1.039	0.696	1.059
13124-20_3	SL018587	Immunoglobulin superfamily containing leucine-rich repeat protein 2	ISLR2	Q6UXK2	57611	ISLR2	Human	RFU	Protein	40	6863.8	6863.8	1.209	FLAG	1.622	0.99	1.064	0.903	0.898	1.003	0.888	0.903	1.074	0.876	0.93	1.367	1.288	0.968	1.244
13125-45_3	SL000616	Vitronectin	Vitronectin	P04004	7448	VTN	Human	RFU	Protein	1	69440	69440	0.89	PASS	0.821	0.962	0.887	0.95	0.877	0.913	0.937	0.941	0.885	0.921	0.939	0.835	0.887	0.99	0.905
13126-52_3	SL008631	Desmocollin-2	DSC2	Q02487	1824	DSC2	Human	RFU	Protein	1	2686.55	2686.55	1.216	FLAG	1.682	0.97	1.144	0.901	0.965	0.974	0.99	0.954	1.007	0.884	0.946	0.933	1.049	0.993	1.082
13129-40_3	SL007070	Low-density lipoprotein receptor	LDLR	P01130	3949	LDLR	Human	RFU	Protein	40	159	159	0.839	PASS	1.047	0.878	1.085	0.961	1.055	0.999	1.021	1.122	0.97	1.039	0.877	1.097	0.711	0.939	1.032
13130-150_3	SL007272	Hexokinase-2	HXK2	P52789	3099	HK2	Human	RFU	Protein	40	529.95	529.95	0.921	PASS	0.916	0.996	1.007	1.019	1.041	0.99	0.985	1.054	1.043	1.086	1.006	0.962	0.918	1.058	0.972
13131-5_3	SL011180	Hexokinase-1	HXK1	P19367	3098	HK1	Human	RFU	Protein	40	1234.35	1234.35	1.918	FLAG	1.855	1.614	1.581	1.56	1.256	1.575	1.197	1.34	1.371	1.287	1.535	1.77	2.352	1.55	1.537
13132-14_3	SL008522	Semaphorin-5A	SEM5A	Q13591	9037	SEMA5A	Human	RFU	Protein	40	5507.2	5507.2	0.892	PASS	0.86	0.877	0.896	0.91	0.798	0.875	0.756	0.845	0.909	0.837	0.891	0.89	0.951	0.9	0.922
13133-73_3	SL007033	Latent-transforming growth factor beta-binding protein 4	LTBP4	Q8N2S1	8425	LTBP4	Human	RFU	Protein	1	1110.85	1110.85	1.016	PASS	1.358	0.93	1.013	0.895	0.816	0.955	0.813	0.875	0.908	0.843	0.904	0.905	1.201	0.966	1.128
14114-18_3	SL019019	PILR alpha-associated neural protein	PIANP	Q8IYJ0	196500	PIANP	Human	RFU	Protein	40	4696.95	4696.95	1.163	PASS	1.391	0.935	1.06	0.797	0.82	0.915	0.994	0.853	1.222	0.823	0.843	1.117	1.112	0.863	1.202
14115-34_3	SL002782	Adrenomedullin	Adrenomedullin	P35318	133	ADM	Human	RFU	Protein	1	1511.65	1511.65	1.104	FLAG	1.102	1.12	1.056	1.14	1.282	1.159	1.445	1.141	1.13	1.264	1.294	0.919	1.146	1.13	1.016
14116-129_3	SL004821	Protein S100-A4	S100A4	P26447	6275	S100A4	Human	RFU	Protein	1	1965.05	1965.05	1.213	FLAG	1.286	0.992	1.063	0.889	0.927	1.531	0.871	1.037	1.155	0.893	0.972	1.207	1.322	0.894	1.315
14120-2_3	SL018629	E3 ubiquitin-protein ligase RNF43	RNF43	Q68DV7	54894	RNF43	Human	RFU	Protein	40	1050.15	1050.15	1.422	FLAG	1.41	1.302	1.135	1.141	0.956	1.155	1.063	0.993	1.124	1.024	1.261	1.06	1.471	1.185	1.136
14121-24_3	SL004159	Tumor necrosis factor receptor superfamily member 10D	TRAIL R4	Q9UBN6	8793	TNFRSF10D	Human	RFU	Protein	40	821.55	821.55	2.301	FLAG	3.094	1.507	1.958	1.273	1.272	1.463	1.149	1.489	1.635	1.217	1.386	2.986	1.892	1.35	2.351
14122-132_3	SL018971	E3 ubiquitin-protein ligase ZNRF3	ZNRF3	Q9ULT6	84133	ZNRF3	Human	RFU	Protein	40	450.45	450.45	0.801	PASS	0.696	0.84	0.757	0.799	0.785	0.784	0.866	0.773	0.758	0.801	0.84	0.763	0.801	0.786	0.761
14123-34_3	SL017424	Platelet receptor Gi24	GI24	Q9H7M9		C10orf54	Human	RFU	Protein	1	383	383	0.783	PASS	0.722	0.918	0.78	0.864	0.91	0.854	0.949	0.785	0.782	0.842	0.869	0.856	0.808	0.838	0.751
14124-6_3	SL004843	Ephrin-A2	Ephrin-A2	O43921	1943	EFNA2	Human	RFU	Protein	1	940.55	940.55	1.989	FLAG	2.154	1.115	1.434	1.025	1.009	1.024	1.138	0.996	1.368	1.017	1.128	1.412	1.661	1.122	1.469
14125-5_3	SL004747	Apolipoprotein M	ApoM	O95445	55937	APOM	Human	RFU	Protein	40	12967.5	12967.5	1.017	PASS	0.939	0.934	0.879	0.878	0.756	0.829	0.843	0.804	0.822	0.835	0.924	0.907	1.208	0.88	0.87
14127-240_3	SL001880	Interferon beta	IFN-b	P01574	3456	IFNB1	Human	RFU	Protein	40	519.15	519.15	0.666	PASS	0.636	0.728	0.673	0.745	0.726	0.692	0.779	0.72	0.672	0.698	0.726	0.651	0.665	0.717	0.705
14128-121_3	SL017106	Interferon alpha-10	IFN10	P01566	3446	IFNA10	Human	RFU	Protein	40	316.85	316.85	1.438	FLAG	1.344	1.432	1.239	1.237	1.105	1.126	1.225	1.129	1.127	1.194	1.397	1.279	1.298	1.282	1.281
14129-1_3	SL019978	Interferon alpha-7	IFNA7	P01567		IFNA7	Human	RFU	Protein	40	277.3	277.3	0.973	PASS	0.973	1.056	1.121	1.119	1.236	1.118	1.198	1.178	1.142	1.17	1.07	1.225	0.91	1.09	1.073
14131-37_3	SL007274	Ephrin-B2	EFNB2	P52799	1948	EFNB2	Human	RFU	Protein	40	11769.4	11769.4	0.867	PASS	1.254	0.758	1.175	0.655	0.678	0.96	0.707	0.732	1.011	0.64	0.68	1.124	0.921	0.741	0.959
14132-21_3	SL020171	HERV-H LTR-associating protein 2	HHLA2	Q9UM44		HHLA2	Human	RFU	Protein	40	1007.55	1007.55	0.713	PASS	0.712	0.785	0.674	0.771	0.694	0.684	0.811	0.715	0.686	0.724	0.777	0.666	0.83	0.729	0.685
14133-93_3	SL000145	Interleukin-1 receptor type 2	IL-1 sRII	P27930	7850	IL1R2	Human	RFU	Protein	1	12099.2	12099.2	1.051	PASS	0.975	1.012	0.948	0.981	0.968	0.955	0.948	0.979	0.983	1.039	1.036	0.895	0.975	1.038	0.965
14134-49_3	SL015046	Amphoterin-induced protein 2	AMGO2	Q86SJ2	347902	AMIGO2	Human	RFU	Protein	40	2166.95	2166.95	2.278	FLAG	2.969	1.661	1.593	1.398	1.232	1.429	1.126	1	1.85	1.151	1.575	1.942	2.877	1.229	2.01
14135-3_3	SL020172	Relaxin receptor 1	RXFP1	Q9HBX9		RXFP1	Human	RFU	Protein	40	393.85	393.85	0.752	PASS	0.792	0.925	1.027	1.025	1.076	1.019	0.996	1.069	0.938	1.077	0.944	1.095	0.743	0.998	0.906
14136-234_3	SL007696	Complement component C1q receptor	C1QR1	Q9NPY3	22918	CD93	Human	RFU	Protein	1	10497.6	10497.6	0.908	PASS	0.887	0.871	0.92	0.91	1.008	0.92	0.89	0.917	0.944	0.959	0.909	0.832	0.825	0.943	0.908
14139-16_3	SL007828	Neuregulin-4	NRG4	Q8WWG1	145957	NRG4	Human	RFU	Protein	40	725.1	725.1	0.798	PASS	0.883	0.916	0.994	0.978	0.963	0.913	1.032	0.961	0.876	0.984	0.941	0.984	0.8	0.948	0.926
14143-8_3	SL014983	Histone H2B type 2-E	H2B2E	Q16778	8349	HIST2H2BE	Human	RFU	Protein	40	7534.85	7534.85	0.596	FLAG	0.564	0.59	0.503	0.555	0.45	0.49	0.506	0.507	0.555	0.527	0.527	0.5	0.639	0.561	0.581
14144-3_3	SL019979	Histone H2A type 3	H2A3	Q7L7L0		HIST3H2A	Human	RFU	Protein	1	470.8	470.8	0.922	PASS	0.844	0.909	0.99	0.97	0.795	0.873	0.72	0.824	0.746	0.832	0.906	0.903	0.939	0.951	0.912
14146-92_3	SL008158	Histone H3.1	H31	P68431	8350	HIST1H3A	Human	RFU	Protein	40	923.7	923.7	0.99	PASS	1.014	0.972	0.939	0.969	0.797	0.904	0.893	0.855	0.875	0.979	0.886	0.875	1.004	0.969	0.921
14147-50_3	SL001802	Interferon gamma	IFN-g	P01579	3458	IFNG	Human	RFU	Protein	40	621.4	621.4	1.054	PASS	1.01	1.102	1.063	1.078	1.026	1.017	1.143	1.023	1.013	1.078	1.123	1.039	1.106	1.058	1.014
14149-9_3	SL005179	Interleukin-36 beta	IL-1F8	Q9NZH7	27177	IL36B	Human	RFU	Protein	40	522.45	522.45	1.009	PASS	1.214	1.084	1.202	1.133	1.144	1.109	1.099	1.11	1.121	1.112	1.081	1.241	1.123	1.13	1.09
14150-7_3	SL005177	Interleukin-36 alpha	IL-1F6	Q9UHA7	27179	IL36A	Human	RFU	Protein	1	831.6	831.6	1.118	FLAG	1.085	1.236	0.659	1.3	0.624	0.632	0.851	0.672	0.676	0.536	1.85	1.405	1.424	1.107	0.437
14151-4_3	SL015510	Ubiquitin-like protein ISG15	UCRP	P05161	9636	ISG15	Human	RFU	Protein	40	1615.35	1615.35	0.985	PASS	1.142	0.872	0.844	0.832	0.722	0.873	0.781	0.805	0.945	0.773	0.834	1.194	1.185	0.825	1.132
14153-8_3	SL004139	Ephrin-A3	Ephrin-A3	P52797	1944	EFNA3	Human	RFU	Protein	40	2437.3	2437.3	1.057	PASS	1.048	1.096	1.08	1.109	0.972	0.994	1.041	0.987	1.003	1.041	1.12	1.004	1.087	1.119	1.15
14156-33_3	SL004815	14-3-3 protein beta/alpha	14-3-3 protein beta/alpha	P31946	7529	YWHAB	Human	RFU	Protein	1	8775.9	8775.9	0.841	PASS	0.827	0.769	0.807	0.823	0.774	0.727	0.738	0.811	0.842	0.768	0.745	0.794	0.772	0.823	0.844
14157-21_3	SL004984	14-3-3 protein epsilon	14-3-3E	P62258	7531	YWHAE	Human	RFU	Protein	40	815.1	815.1	0.59	FLAG	0.607	0.714	0.598	0.626	0.573	0.592	0.756	0.606	0.571	0.596	0.628	0.538	0.721	0.595	0.604
14158-17_3	SL003848	Annexin A5	Annexin V	P08758	308	ANXA5	Human	RFU	Protein	40	1525.5	1525.5	0.983	PASS	0.978	0.945	0.9	0.961	0.843	0.915	0.869	0.893	0.991	0.899	0.947	0.961	0.973	0.917	1.007
14583-49_3	SL004357	Growth/differentiation factor 8	Myostatin	O14793	2660	MSTN	Human	RFU	Protein	40	4975.85	4975.85	1.408	FLAG	1.311	1.312	1.222	1.265	1.196	1.278	1.191	1.216	1.279	1.291	1.316	1.272	1.519	1.325	1.293
2182-54_1	SL000318	Complement C4b	C4b	P0C0L4 P0C0L5	720 721	C4A C4B	Human	RFU	Protein	0.005	483.7	483.7	0.758	FLAG	0.661	0.788	0.525	0.773	0.504	0.493	0.697	0.53	0.609	0.542	0.983	0.607	0.816	0.725	0.48
2190-55_1	SL002662	Coagulation Factor XI	Coagulation Factor XI	P03951	2160	F11	Human	RFU	Protein	0.005	1689.4	1689.4	1.422	FLAG	1.317	1.277	1.123	1.184	1.048	1.08	1.071	1.041	1.243	1.084	1.343	1.261	1.375	1.162	1.347
2192-63_10	SL003168	C-C motif chemokine 27	CTACK	Q9Y4X3	10850	CCL27	Human	RFU	Protein	40	1156.45	1156.45	1.167	PASS	1.35	1.165	1.204	1.09	1.202	1.162	1.291	1.268	1.245	1.297	1.219	1.137	1.161	1.258	1.204
2201-17_6	SL000403	Endostatin	Endostatin	P39060	80781	COL18A1	Human	RFU	Protein	1	62019.2	62019.2	1.122	PASS	1.082	1.141	1.128	1.053	1.107	1.147	1.089	1.078	1.159	1.025	1.098	0.99	1.109	1.111	1.049
2211-9_6	SL000591	Metalloproteinase inhibitor 1	TIMP-1	P01033	7076	TIMP1	Human	RFU	Protein	0.005	60.9	60.9	0.25	FLAG	0.25	0.232	0.222	0.213	0.217	0.216	0.267	0.236	0.236	0.234	0.241	0.203	0.225	0.246	0.239
2212-69_1	SL000053	Tissue-type plasminogen activator	tPA	P00750	5327	PLAT	Human	RFU	Protein	1	596.65	596.65	1.022	PASS	0.941	1.069	0.888	1.057	0.785	0.774	0.992	0.773	0.881	0.785	1.1	0.805	1.039	0.924	1.028
2247-20_11	SL004332	Prokineticin-1	EG-VEGF	P58294	84432	PROK1	Human	RFU	Protein	40	237.5	237.5	0.65	PASS	0.698	0.804	0.833	0.844	0.944	0.849	0.864	0.931	0.809	0.905	0.809	0.865	0.624	0.88	0.796
2278-61_4	SL000592	Metalloproteinase inhibitor 2	TIMP-2	P16035	7077	TIMP2	Human	RFU	Protein	0.005	372.9	372.9	1.061	PASS	0.979	1.052	0.973	1.041	1.033	1.013	1.143	0.982	1.013	1.065	1.088	0.959	0.998	1.068	1.012
2333-72_1	SL000584	Transforming growth factor beta-1	TGF-b1	P01137	7040	TGFB1	Human	RFU	Protein	40	1436.35	1436.35	1.182	PASS	1.217	1.237	1.255	1.279	1.206	1.26	1.206	1.265	1.268	1.275	1.274	1.31	1.226	1.268	1.311
2358-19_2	SL003322	Vascular endothelial growth factor receptor 3	VEGF sR3	P35916	2324	FLT4	Human	RFU	Protein	1	7923.75	7923.75	1.181	PASS	1.098	1.219	1.126	1.242	1.064	1.084	1.131	1.083	1.136	1.157	1.244	1.006	1.21	1.225	1.235
2381-52_4	SL000319	Complement C5	C5	P01031	727	C5	Human	RFU	Protein	0.005	6574	6574	1.142	PASS	1.098	0.927	0.775	0.845	0.922	0.891	0.936	0.83	1.015	0.871	1.01	0.854	1.082	0.822	0.913
2418-55_9	SL000276	Apolipoprotein E	Apo E	P02649	348	APOE	Human	RFU	Protein	0.005	43792.7	43792.7	3.079	FLAG	2.808	2.372	2.114	2.029	1.716	2.175	1.311	2.071	2.902	2.088	2.194	3.315	3.908	1.961	2.653
2421-7_3	SL003951	Brain-derived neurotrophic factor	BDNF	P23560	627	BDNF	Human	RFU	Protein	40	808.4	808.4	0.94	PASS	0.923	0.944	0.977	0.914	0.914	0.933	0.964	1.006	1.045	1.005	0.927	0.996	0.873	1.024	1.09
2429-27_4	SL000324	Complement component C8	C8	P07357;P07358;P07360	731 732 733	C8A C8B C8G	Human	RFU	Protein	40	4946.25	4946.25	1.96	FLAG	1.799	1.519	1.455	1.359	1.255	1.818	1.299	1.536	1.839	1.333	1.429	1.974	1.579	1.371	1.574
2431-17_3	SL000345	Cathepsin G	Cathepsin G	P08311	1511	CTSG	Human	RFU	Protein	40	880.6	880.6	0.798	PASS	0.866	0.89	0.893	0.962	0.928	0.888	0.895	0.954	0.882	0.974	0.916	0.93	0.796	0.965	0.891
2436-49_4	SL004016	C-X-C motif chemokine 16	CXCL16; soluble	Q9H2A7	58191	CXCL16	Human	RFU	Protein	1	10363.1	10363.1	1.249	PASS	1.309	1.074	1.173	0.969	1.201	1.258	1.059	1.137	1.213	1.085	1.009	1.201	1.205	1.096	1.172
2441-2_4	SL004333	Fibroblast growth factor 10	FGF-10	O15520	2255	FGF10	Human	RFU	Protein	40	262.85	262.85	0.738	PASS	0.822	0.916	0.946	0.989	1.017	0.935	0.913	0.95	0.841	0.957	0.886	0.999	0.753	0.942	0.864
2443-10_4	SL004342	Fibroblast growth factor 8 isoform B	FGF-8B	P55075	2253	FGF8	Human	RFU	Protein	40	774.6	774.6	1.074	PASS	1.016	1.156	1.083	1.144	1.082	1.15	1.061	1.125	1.05	1.184	1.157	1.156	1.063	1.172	1.026
2447-7_4	SL004066	Group IIE secretory phospholipase A2	GIIE	Q9NZK7	30814	PLA2G2E	Human	RFU	Protein	40	228.5	228.5	0.807	PASS	0.787	0.854	1.063	0.98	1.093	1.088	0.975	1.084	1.017	1.045	0.854	1.144	0.854	0.937	0.993
2449-1_4	SL004182	Calcium-dependent phospholipase A2	GV	P39877	5322	PLA2G5	Human	RFU	Protein	40	238	238	0.624	PASS	0.67	0.747	0.875	0.866	0.971	0.955	0.867	0.956	0.825	0.929	0.764	0.959	0.646	0.843	0.77
2468-62_3	SL000133	C-C motif chemokine 20	MIP-3a	P78556	6364	CCL20	Human	RFU	Protein	40	189.85	189.85	0.714	PASS	0.806	0.862	0.865	0.875	0.887	0.904	0.89	0.918	0.837	0.953	0.853	0.901	0.697	0.924	0.85
2474-54_5	SL000573	Serum amyloid P-component	SAP	P02743	325	APCS	Human	RFU	Protein	0.005	36505.9	36505.9	1.247	PASS	1.161	1.119	1.128	1.081	1.077	1.112	1.026	0.987	1.168	0.977	1.102	1.002	1.214	1.093	1.123
2475-1_3	SL004010	Mast/stem cell growth factor receptor Kit	SCF sR	P10721	3815	KIT	Human	RFU	Protein	1	18540.5	18540.5	1.1	PASS	1.098	1.111	0.905	1.06	0.872	0.999	1.316	0.839	1.097	0.9	1.14	0.765	1.285	0.928	0.888
2480-58_3	SL003043	Metalloproteinase inhibitor 3	TIMP-3	P35625	7078	TIMP3	Human	RFU	Protein	1	1731	1731	0.854	PASS	0.97	0.891	0.856	0.891	0.886	0.849	0.995	0.864	1.026	0.859	0.938	0.811	0.836	0.885	1.019
2500-2_3	SL004643	Angiopoietin-4	Angiopoietin-4	Q9Y264	51378	ANGPT4	Human	RFU	Protein	40	1258.85	1258.85	1.952	FLAG	1.914	1.97	1.813	1.873	1.856	1.995	1.768	1.93	1.973	2.04	1.95	2.001	1.823	2.028	1.866
2501-51_3	SL000055	Cadherin-1	Cadherin E	P12830	999	CDH1	Human	RFU	Protein	1	72176.2	72176.2	1.125	PASS	1.048	1.022	1.151	1.044	0.977	1.025	1.029	0.998	1.11	0.957	1.021	0.986	1.036	1.061	1.127
2505-49_3	SL004144	GDNF family receptor alpha-3	GFRa-3	O60609	2676	GFRA3	Human	RFU	Protein	40	758.7	758.7	0.945	PASS	1.015	1.004	1.047	1.084	1.087	1.115	0.999	1.13	1.061	1.137	1.043	1.064	1.021	1.071	1.113
2514-65_3	SL004142	Ephrin-B3	Ephrin-B3	Q15768	1949	EFNB3	Human	RFU	Protein	40	757.05	757.05	0.928	PASS	0.923	0.968	0.936	0.952	0.948	0.968	0.93	0.983	0.949	1.015	0.953	0.95	0.897	0.987	0.973
2515-14_3	SL004143	GDNF family receptor alpha-2	GFRa-2	O00451	2675	GFRA2	Human	RFU	Protein	1	5010.8	5010.8	1.298	FLAG	1.568	1.225	1.229	1.105	1.109	1.249	1.096	1.148	1.237	1.07	1.202	1.192	1.31	1.151	1.323
2516-57_3	SL003193	C-C motif chemokine 21	6Ckine	O00585	6366	CCL21	Human	RFU	Protein	1	29248	29248	2.485	FLAG	2.402	2.252	2.22	2.046	2.201	2.248	2.368	2.251	2.359	2.295	2.242	2.084	2.182	2.396	2.338
2524-56_3	SL003280	High mobility group protein B1	HMG-1	P09429	3146	HMGB1	Human	RFU	Protein	40	3706.45	3706.45	1.522	FLAG	1.496	1.383	1.418	1.377	1.254	1.423	1.173	1.367	1.337	1.347	1.396	1.453	1.51	1.4	1.308
2526-53_3	SL002539	Tumor necrosis factor receptor superfamily member 11B	OPG	O00300	4982	TNFRSF11B	Human	RFU	Protein	40	13338	13338	2.431	FLAG	2.146	2.174	2.067	1.855	1.743	2.056	1.512	1.808	2.048	1.649	2.028	2.257	2.745	2.048	1.895
2558-51_3	SL000300	Beta-endorphin	b-Endorphin	P01189	5443	POMC	Human	RFU	Protein	40	991.2	991.2	1.142	PASS	1.151	1.198	1.309	1.256	1.268	1.229	1.235	1.332	1.285	1.365	1.242	1.282	1.032	1.326	1.317
2567-5_6	SL003328	Complement factor I	Factor I	P05156	3426	CFI	Human	RFU	Protein	0.005	40286.9	40286.9	1.331	FLAG	1.325	1.23	1.16	1.284	1.259	1.296	1.144	1.129	1.275	1.145	1.298	1.501	1.561	1.228	1.537
2571-12_3	SL000045	Insulin-like growth factor-binding protein 3	IGFBP-3	P17936	3486	IGFBP3	Human	RFU	Protein	0.005	1739.8	1739.8	1.089	FLAG	1.254	1.144	1.146	0.938	1.293	1.33	1.222	1.322	1.431	1.36	0.93	0.959	1.221	1.016	1.13
2578-67_2	SL000038	C-C motif chemokine 2	MCP-1	P13500	6347	CCL2	Human	RFU	Protein	40	1049.25	1049.25	1.294	FLAG	1.326	1.378	1.463	1.373	1.333	1.343	1.435	1.4	1.395	1.478	1.391	1.334	1.117	1.562	1.489
2579-17_5	SL000527	Matrix metalloproteinase-9	MMP-9	P14780	4318	MMP9	Human	RFU	Protein	1	14612.9	14612.9	1.099	PASS	1.018	1.033	0.922	1.01	1.01	1.003	0.951	0.997	1.027	1.036	1.062	0.949	1.083	1.033	0.95
2580-83_2	SL001796	Myeloperoxidase	Myeloperoxidase	P05164	4353	MPO	Human	RFU	Protein	1	15169.6	15169.6	1.142	PASS	1.124	1.059	1.015	0.962	1.098	1.117	1.051	1.105	1.167	1.053	1.018	0.946	1.039	1.074	1.12
2585-2_5	SL000546	Prolactin	PRL	P01236	5617	PRL	Human	RFU	Protein	1	1751.65	1751.65	1.007	PASS	1.015	1.032	0.936	1.017	0.985	0.959	1.024	0.909	0.99	0.942	1.092	0.89	1.038	0.988	1.007
2597-8_3	SL000002	Vascular endothelial growth factor A	VEGF	P15692	7422	VEGFA	Human	RFU	Protein	40	9504.5	9504.5	0.974	PASS	0.96	0.93	0.893	0.844	0.842	0.86	0.913	0.865	0.942	0.895	0.905	0.844	0.965	0.921	0.922
2598-9_3	SL004126	Tumor necrosis factor receptor superfamily member 9	4-1BB	Q07011	3604	TNFRSF9	Human	RFU	Protein	40	325.8	325.8	0.896	PASS	0.969	0.881	0.881	0.862	0.959	0.92	1.004	0.949	1.103	0.93	0.928	0.869	0.934	0.878	0.87
2599-51_2	SL003735	Tumor necrosis factor ligand superfamily member 9	4-1BB ligand	P41273	8744	TNFSF9	Human	RFU	Protein	40	385.05	385.05	1.287	FLAG	1.746	1.306	1.44	1.347	1.507	1.521	1.424	1.521	1.358	1.435	1.289	1.567	1.354	1.323	1.41
2602-2_2	SL001996	Angiopoietin-2	Angiopoietin-2	O15123	285	ANGPT2	Human	RFU	Protein	1	141.3	141.3	1.001	PASS	0.91	1.037	0.999	0.931	1.028	0.979	1.002	0.994	1.014	0.985	0.976	0.939	0.88	1.029	1.03
2603-61_2	SL003738	T-lymphocyte activation antigen CD80	B7	P33681	941	CD80	Human	RFU	Protein	40	582.9	582.9	0.682	PASS	0.858	0.79	0.822	0.794	0.818	0.881	0.779	0.918	0.762	0.831	0.758	0.907	0.723	0.794	0.733
2605-49_2	SL004180	Tumor necrosis factor receptor superfamily member 8	CD30	P28908	943	TNFRSF8	Human	RFU	Protein	40	804.85	804.85	0.712	PASS	0.721	0.769	0.825	0.804	0.858	0.878	0.824	0.92	0.817	0.877	0.766	0.839	0.711	0.817	0.794
2607-54_2	SL004692	Cytokine receptor-like factor 1:Cardiotrophin-like cytokine factor 1 Complex	CLF-1/CLC Complex	O75462 Q9UBD9	9244 23529	CRLF1 CLCF1	Human	RFU	Protein	40	505	505	0.743	PASS	0.805	0.852	0.953	0.929	0.974	0.948	0.96	1.001	0.865	0.994	0.868	1.002	0.73	0.918	0.859
2609-59_2	SL001777	Cystatin-C	Cystatin C	P01034	1471	CST3	Human	RFU	Protein	0.005	2085.55	2085.55	0.943	PASS	1.003	0.926	0.906	0.865	0.906	0.879	1.214	0.922	0.947	0.965	0.982	0.826	0.872	1.011	0.894
2611-72_2	SL004136	Tyrosine-protein kinase receptor TYRO3	Dtk	Q06418	7301	TYRO3	Human	RFU	Protein	40	562.05	562.05	0.632	PASS	0.647	0.689	0.652	0.702	0.703	0.72	0.79	0.736	0.715	0.751	0.69	0.634	0.665	0.684	0.628
2612-5_2	SL004759	Eukaryotic translation initiation factor 5	eIF-5	P55010	1983	EIF5	Human	RFU	Protein	40	1306.35	1306.35	0.905	PASS	0.995	0.832	0.793	0.79	0.745	0.839	0.76	0.811	0.858	0.774	0.802	0.98	0.91	0.816	0.873
2614-28_2	SL004140	Ephrin-A4	Ephrin-A4	P52798	1945	EFNA4	Human	RFU	Protein	40	1637.15	1637.15	0.656	FLAG	0.747	0.714	0.68	0.715	0.682	0.638	0.843	0.65	0.745	0.683	0.73	0.599	0.64	0.641	0.795
2615-60_2	SL004141	Ephrin-A5	Ephrin-A5	P52803	1946	EFNA5	Human	RFU	Protein	40	2804.1	2804.1	0.621	FLAG	0.665	0.652	0.637	0.596	0.694	0.698	0.76	0.707	0.685	0.728	0.643	0.611	0.596	0.667	0.661
2616-23_18	SL000009	Receptor tyrosine-protein kinase erbB-2	ERBB2	P04626	2064	ERBB2	Human	RFU	Protein	40	382.05	382.05	0.85	PASS	0.85	1.036	0.975	1.037	1.036	0.947	1.022	1.079	0.921	1.077	1.04	1.032	0.811	1.063	0.963
2617-56_35	SL002519	Receptor tyrosine-protein kinase erbB-3	ERBB3	P21860	2065	ERBB3	Human	RFU	Protein	1	326.55	326.55	0.764	PASS	0.747	0.829	0.738	0.787	0.828	0.739	1.059	0.724	0.772	0.751	0.827	0.669	0.725	0.7	0.73
2618-10_2	SL003803	Receptor tyrosine-protein kinase erbB-4	ERBB4	Q15303	2066	ERBB4	Human	RFU	Protein	40	155.2	155.2	0.613	PASS	0.819	0.763	0.959	0.863	1.088	1.031	0.933	1.07	0.896	0.957	0.757	1.103	0.699	0.842	0.89
2619-72_2	SL001890	Tumor-associated calcium signal transducer 2	GA733-1 protein	P09758	4070	TACSTD2	Human	RFU	Protein	40	370.1	370.1	0.758	PASS	0.845	0.946	1.027	1.071	1.118	1.015	1.027	1.107	0.956	1.102	0.98	1.046	0.725	1.053	0.948
2620-4_2	SL003872	Interleukin-6 receptor subunit beta	gp130; soluble	P40189	3572	IL6ST	Human	RFU	Protein	1	6559.6	6559.6	1.233	FLAG	1.59	1.104	1.142	1.108	1.277	1.285	1.091	1.115	1.322	1.125	1.211	1.205	1.24	1.04	1.155
2622-18_1	SL004751	Heme oxygenase 2	HO-2	P30519	3163	HMOX2	Human	RFU	Protein	40	345.25	345.25	0.932	PASS	0.948	1.036	1.076	1.112	1.141	1.022	1.15	1.182	1.119	1.14	1.024	1.123	0.88	1.067	1.066
2623-54_4	SL004697	Protein E7_HPV16	HPV E7 Type 16	P03129	1489079	Human-virus	Human papillomavirus type 16	RFU	Protein	40	537.55	537.55	0.741	FLAG	0.478	0.737	0.525	0.642	0.726	0.55	0.621	0.608	0.501	0.667	0.741	0.548	0.597	0.663	0.569
2624-31_2	SL004698	Protein E7_HPV18	HPV E7 Type18	P06788	1489089	Human-virus	Human papillomavirus type 18	RFU	Protein	40	1811.5	1811.5	1.168	FLAG	1.118	1.258	1.196	1.15	1.053	1.331	0.966	1.111	1.134	1.135	1.194	1.354	1.535	1.2	1.141
2625-53_4	SL017612	Heat shock protein HSP 90-alpha/beta	HSP 90a/b	P07900 P08238		HSP90AA1 HSP90AB1	Human	RFU	Protein	1	3934.9	3934.9	0.874	PASS	0.807	0.873	0.826	0.878	0.842	0.789	0.799	0.898	0.864	0.888	0.847	0.747	0.83	0.908	0.83
2630-12_2	SL004588	Interleukin-1 Receptor accessory protein	IL-1 R AcP	Q9NPH3	3556	IL1RAP	Human	RFU	Protein	1	32374.2	32374.2	1.257	PASS	1.124	1.159	1.108	1.105	1.181	1.294	1.133	1.101	1.266	1.141	1.215	0.987	1.21	1.071	1.051
2631-50_2	SL004147	Interleukin-10 receptor subunit beta	IL-10 Rb	Q08334	3588	IL10RB	Human	RFU	Protein	40	1049.7	1049.7	0.755	PASS	0.773	0.887	0.8	0.859	0.834	0.811	0.962	0.818	0.787	0.867	0.869	0.722	0.803	0.779	0.776
2632-5_2	SL004148	Interleukin-12 receptor subunit beta-1	IL-12 Rb1	P42701	3594	IL12RB1	Human	RFU	Protein	40	477.85	477.85	0.756	PASS	0.735	0.804	0.853	0.864	0.949	0.924	0.88	0.916	0.845	0.944	0.815	0.981	0.692	0.847	0.805
2633-52_2	SL004149	Interleukin-13 receptor subunit alpha-1	IL-13 Ra1	P78552	3597	IL13RA1	Human	RFU	Protein	40	2352.8	2352.8	1.009	PASS	0.962	0.915	0.917	0.981	0.784	0.85	0.845	0.844	0.863	0.843	0.981	0.917	1.045	0.935	0.928
2634-2_2	SL003307	Cytokine receptor common subunit gamma	IL-2 sRg	P31785	3561	IL2RG	Human	RFU	Protein	40	1540.3	1540.3	1.065	PASS	0.952	1.106	0.937	1.024	0.979	1.031	0.958	1.072	0.998	1.121	1.075	0.894	0.989	1.121	0.941
2635-61_2	SL004646	Layilin	Layilin	Q6UX15	143903	LAYN	Human	RFU	Protein	40	1297.1	1297.1	0.737	PASS	0.738	0.784	0.758	0.737	0.794	0.793	0.895	0.775	0.772	0.794	0.786	0.715	0.702	0.755	0.716
2636-10_2	SL000509	Tumor necrosis factor receptor superfamily member 3	Lymphotoxin b R	P36941	4055	LTBR	Human	RFU	Protein	40	5685.05	5685.05	1.116	PASS	0.984	1.087	1.089	1.023	0.964	1.32	0.862	1.031	1.061	0.999	1.055	0.993	1.364	1.012	0.897
2637-77_2	SL004579	Macrophage mannose receptor 1	Macrophage mannose receptor	P22897	4360	MRC1	Human	RFU	Protein	1	8577.05	8577.05	1.334	FLAG	1.249	1.405	1.287	1.451	1.185	1.146	1.198	1.223	1.137	1.296	1.486	1.228	1.556	1.462	1.221
2638-12_2	SL004153	Macrophage colony-stimulating factor 1 receptor	M-CSF R	P07333	1436	CSF1R	Human	RFU	Protein	0.005	179.25	179.25	1.091	PASS	1.088	0.989	0.806	0.944	0.939	0.86	1.308	0.768	1.082	0.845	1.106	0.923	1.058	0.827	1.051
2640-3_2	SL004637	Macrophage-stimulating protein receptor	MSP R	Q04912	4486	MST1R	Human	RFU	Protein	40	459.1	459.1	0.611	PASS	0.766	0.736	0.797	0.804	0.793	0.848	0.742	0.826	0.778	0.801	0.742	0.84	0.651	0.745	0.685
2642-4_1	SL004760	Platelet-activating factor acetylhydrolase IB subunit beta	PAFAH beta subunit	P68402	5049	PAFAH1B2	Human	RFU	Protein	40	3434.9	3434.9	1.171	PASS	1.111	1.089	1.06	1.07	0.964	1.051	1.094	1.057	1.082	1.139	1.122	1.077	1.192	1.073	1.149
2643-57_2	SL004183	Cadherin-3	P-Cadherin	P22223	1001	CDH3	Human	RFU	Protein	1	25929.7	25929.7	1.553	FLAG	1.441	1.405	0.986	1.291	1.103	1.159	1.92	0.855	1.272	1.061	1.729	0.928	1.637	0.939	1.077
2644-11_2	SL000551	Protein kinase C alpha type	PKC-A	P17252	5578	PRKCA	Human	RFU	Protein	40	13861.8	13861.8	1.886	FLAG	1.462	1.386	1.355	1.437	1.347	1.469	1.12	1.249	1.587	1.484	1.485	1.404	1.592	1.402	1.321
2645-54_1	SL000557	Protein kinase C zeta type	PKC-Z	Q05513	5590	PRKCZ	Human	RFU	Protein	40	565.95	565.95	1.007	PASS	1.179	1.006	1.032	1.08	1.059	1.065	1.032	1.148	1.088	1.151	1.016	1.172	0.948	1.075	1.048
2647-66_2	SL003648	Rab GDP dissociation inhibitor beta	Rab GDP dissociation inhibitor beta	P50395	2665	GDI2	Human	RFU	Protein	1	12986.9	12986.9	0.962	PASS	0.896	0.895	0.864	0.901	0.943	0.919	0.932	0.919	1.021	0.951	0.913	0.817	0.905	0.949	0.894
2649-77_2	SL003178	Intercellular adhesion molecule 3	sICAM-3	P32942	3385	ICAM3	Human	RFU	Protein	40	629.8	629.8	1	PASS	0.952	1.003	1.02	1.048	1.021	1.093	1.005	1.07	1.013	1.061	1.022	1.03	1.126	1.046	0.94
2652-15_1	SL002506	Urokinase plasminogen activator surface receptor	suPAR	Q03405	5329	PLAUR	Human	RFU	Protein	40	8834.9	8834.9	0.825	PASS	0.794	0.788	0.81	0.734	0.757	0.818	0.785	0.732	0.835	0.695	0.746	0.732	0.846	0.743	0.921
2654-19_1	SL001992	Tumor necrosis factor receptor superfamily member 1A	TNF sR-I	P19438	7132	TNFRSF1A	Human	RFU	Protein	1	1010.6	1010.6	1.306	PASS	1.234	1.264	1.21	1.271	1.167	1.203	1.307	1.268	1.272	1.32	1.393	1.184	1.268	1.352	1.224
2658-27_1	SL004639	NT-3 growth factor receptor	TrkC	Q16288	4916	NTRK3	Human	RFU	Protein	40	5105.15	5105.15	0.595	FLAG	0.661	0.627	0.606	0.617	0.599	0.654	0.714	0.598	0.672	0.661	0.654	0.554	0.734	0.597	0.647
2665-26_2	SL004672	Tumor necrosis factor receptor superfamily member 17	BCMA	Q02223	608	TNFRSF17	Human	RFU	Protein	1	8065.55	8065.55	1.002	PASS	0.924	1.011	0.894	0.95	0.972	0.944	1.017	0.94	0.911	1.005	1.05	0.861	0.939	0.959	0.918
2666-53_2	SL004081	Decorin	Bone proteoglycan II	P07585	1634	DCN	Human	RFU	Protein	40	2862.5	2862.5	0.64	FLAG	0.597	0.665	0.557	0.639	0.56	0.557	0.726	0.56	0.614	0.611	0.682	0.532	0.682	0.585	0.653
2668-70_2	SL000337	Calpain I	Calpain I	P07384 P04632	823 826	CAPN1 CAPNS1	Human	RFU	Protein	1	24849.7	24849.7	1.133	PASS	1.165	0.987	1.157	1.033	1.141	1.166	0.891	1.184	1.147	0.944	0.951	1.01	1.017	1.033	1.187
2670-67_4	SL000383	Creatine kinase M-type	CK-MM	P06732	1158	CKM	Human	RFU	Protein	1	885.7	885.7	1.13	PASS	1.091	1.109	0.997	0.959	1.033	1.14	1.054	1.085	1.127	1.06	1.142	0.962	1.144	1.005	1.064
2677-1_1	SL002644	Epidermal growth factor receptor	ERBB1	P00533	1956	EGFR	Human	RFU	Protein	1	30794	30794	1.386	PASS	1.263	1.179	1.213	1.141	1.179	1.331	1.032	1.137	1.185	1.064	1.161	1.136	1.288	1.209	1.209
2681-23_2	SL000441	Hepatocyte growth factor	HGF	P14210	3082	HGF	Human	RFU	Protein	40	1680.05	1680.05	1.185	PASS	1.131	1.232	1.147	1.264	1.045	1.106	1.031	1.105	1.145	1.204	1.261	1.163	1.24	1.276	1.194
2682-68_1	SL000450	60 kDa heat shock protein; mitochondrial	HSP 60	P10809	3329	HSPD1	Human	RFU	Protein	40	5194.05	5194.05	0.585	FLAG	0.685	0.477	0.428	0.479	0.41	0.466	0.361	0.415	0.508	0.441	0.495	0.499	0.603	0.447	0.435
2683-1_2	SL000456	Complement C3b; inactivated	iC3b	P01024	718	C3	Human	RFU	Protein	0.005	7918.4	7918.4	1.5	FLAG	1.208	1.64	1.133	1.393	1.129	1.435	0.748	1.057	1.412	1.179	1.51	1.68	1.642	1.063	1.144
2685-21_2	SL004676	Insulin-like growth factor-binding protein 5	IGFBP-5	P24593	3488	IGFBP5	Human	RFU	Protein	0.005	2122.1	2122.1	1.788	FLAG	1.879	1.496	1.394	1.349	1.359	1.597	1.334	1.588	1.762	1.474	1.481	1.849	1.854	1.228	1.525
2686-67_2	SL005172	Insulin-like growth factor-binding protein 6	IGFBP-6	P24592	3489	IGFBP6	Human	RFU	Protein	0.005	634.05	634.05	0.896	PASS	0.86	0.929	0.794	0.808	0.785	0.779	1.104	0.809	0.854	0.821	0.932	0.697	0.854	0.841	0.819
2687-2_1	SL001947	Melanoma-derived growth regulatory protein	MIA	Q16674	8190	MIA	Human	RFU	Protein	1	3369.65	3369.65	1.067	PASS	1.005	1.029	0.987	0.967	0.999	1.028	1.02	1.03	1.037	1.056	1.012	0.929	1.005	1.044	1.038
2692-74_2	SL002528	Phospholipase A2; membrane associated	NPS-PLA2	P14555	5320	PLA2G2A	Human	RFU	Protein	1	3502.25	3502.25	1.066	PASS	1.23	0.972	1.326	0.98	0.975	1.08	0.971	0.992	1.113	0.955	0.958	1.241	1.045	1.015	1.34
2693-20_3	SL000530	Oncostatin-M	OSM	P13725	5008	OSM	Human	RFU	Protein	40	1762.5	1762.5	1.298	FLAG	1.317	1.323	1.354	1.182	1.151	1.512	1.009	1.306	1.32	1.198	1.217	1.563	1.55	1.279	1.285
2695-25_1	SL001721	Platelet endothelial cell adhesion molecule	PECAM-1	P16284	5175	PECAM1	Human	RFU	Protein	40	874.7	874.7	0.884	PASS	0.887	0.955	1.085	0.983	1.012	1.017	0.937	1.083	0.925	1.005	0.926	1.148	0.855	0.943	0.955
2696-87_2	SL004685	Persephin	Persephin	O60542	5623	PSPN	Human	RFU	Protein	40	241.05	241.05	0.623	PASS	0.721	0.735	0.824	0.779	0.897	0.848	0.8	0.883	0.839	0.858	0.74	0.887	0.599	0.784	0.805
2697-7_2	SL003041	Platelet factor 4	PF-4	P02776	5196	PF4	Human	RFU	Protein	0.005	35283.7	35283.7	1.077	PASS	0.98	0.844	0.921	0.739	0.869	0.96	0.717	0.947	1.072	0.837	0.785	0.893	1.121	0.739	1.072
2700-56_2	SL000049	Vitamin K-dependent protein S	Protein S	P07225	5627	PROS1	Human	RFU	Protein	0.005	4485.05	4485.05	0.918	PASS	0.939	0.932	1.066	1.032	1.02	0.912	0.993	0.935	1.025	0.989	0.939	0.865	0.801	1.02	1.181
2704-74_1	SL004364	Tumor necrosis factor receptor superfamily member 13B	TACI	O14836	23495	TNFRSF13B	Human	RFU	Protein	40	1037.4	1037.4	0.845	PASS	0.9	0.747	0.787	0.707	0.669	0.728	0.644	0.688	0.746	0.675	0.73	0.823	0.835	0.708	0.894
2705-5_2	SL003197	C-C motif chemokine 25	TECK	O15444	6370	CCL25	Human	RFU	Protein	40	1677.25	1677.25	0.763	PASS	0.79	0.785	0.714	0.752	0.775	0.787	0.794	0.815	0.843	0.84	0.779	0.728	0.759	0.823	0.763
2706-69_2	SL000590	Thyroxine-binding globulin	Thyroxine-Binding Globulin	P05543	6906	SERPINA7	Human	RFU	Protein	0.005	43142.7	43142.7	1.096	PASS	1.067	1.115	1.094	1.051	1.063	1.082	0.989	1.011	1.129	1.018	1.058	1.064	1.128	1.091	1.1
2708-54_2	SL004326	Tumor necrosis factor ligand superfamily member 18	TNFSF18	Q9UNG2	8995	TNFSF18	Human	RFU	Protein	40	563.65	563.65	0.784	PASS	0.809	0.847	0.815	0.881	0.881	0.868	0.91	0.888	0.835	0.891	0.89	0.883	0.774	0.811	0.738
2711-6_2	SL005153	Ciliary neurotrophic factor receptor subunit alpha	CNTFR alpha	P26992	1271	CNTFR	Human	RFU	Protein	40	7193.4	7193.4	0.639	FLAG	0.649	0.559	0.538	0.539	0.497	0.561	0.495	0.512	0.56	0.511	0.52	0.592	0.721	0.512	0.615
2714-78_2	SL003334	Endothelial monocyte-activating polypeptide 2	EMAP-2	Q12904	9255	AIMP1	Human	RFU	Protein	40	5135.4	5135.4	1.22	FLAG	1.428	1.156	1.267	1.193	1.157	1.171	1.091	1.129	1.334	1.108	1.096	1.425	1.163	1.123	1.27
2715-25_2	SL005159	Erythropoietin receptor	EPO-R	P19235	2057	EPOR	Human	RFU	Protein	40	273.95	273.95	0.744	PASS	1.023	0.759	1.064	0.881	0.999	0.895	0.887	1.029	0.926	0.926	0.77	1.342	0.748	0.869	0.857
2719-3_4	SL004591	Granulocyte colony-stimulating factor receptor	G-CSF-R	Q99062	1441	CSF3R	Human	RFU	Protein	40	785.7	785.7	1.119	FLAG	0.917	1.452	1.061	1.245	1.42	1.081	1.243	1.295	0.848	1.273	1.275	1.307	1.076	1.392	1.134
2723-9_2	SL005178	Interleukin-37	IL-1F7	Q9NZH6	27178	IL37	Human	RFU	Protein	40	1929.65	1929.65	1.266	FLAG	1.216	1.233	1.313	1.244	1.122	1.343	0.999	1.225	1.251	1.175	1.181	1.483	1.399	1.236	1.198
2728-62_2	SL000497	Laminin	Laminin	P25391; P07942; P11047	284217 3912 3915	LAMA1 LAMB1 LAMC1	Human	RFU	Protein	40	1852.5	1852.5	0.773	PASS	0.76	0.79	0.867	0.865	0.71	0.76	0.702	0.756	0.781	0.785	0.808	0.772	0.745	0.883	0.9
2730-58_2	SL005199	MHC class I polypeptide-related sequence A	MICA	Q29983	4276	MICA	Human	RFU	Protein	40	289.55	289.55	0.776	PASS	0.782	0.881	0.793	0.839	0.855	0.801	0.926	0.862	0.829	0.913	0.891	0.819	0.775	0.84	0.797
2731-29_2	SL000528	NADPH--cytochrome P450 reductase	NADPH-P450 Oxidoreductase	P16435	5447	POR	Human	RFU	Protein	40	3108.3	3108.3	0.889	PASS	0.795	0.914	0.763	0.861	0.796	0.781	0.781	0.804	0.826	0.863	0.875	0.79	0.88	0.845	0.763
2732-58_3	SL005235	Homeobox protein NANOG	NANOG	Q9H9S0	79923	NANOG	Human	RFU	Protein	40	153.5	153.5	0.665	PASS	0.748	0.922	1.085	1.089	1.345	1.089	1.181	1.299	0.991	1.228	0.911	1.193	0.616	1.036	0.925
2734-49_4	SL005206	Natural cytotoxicity triggering receptor 2	NKp44	O95944	9436	NCR2	Human	RFU	Protein	40	257.7	257.7	0.645	PASS	0.762	0.817	1.004	0.974	1.258	1.035	1.05	1.149	0.971	1.116	0.838	1.049	0.62	0.938	0.869
2737-22_2	SL005236	Protein NOV homolog	NovH	P48745	4856	NOV	Human	RFU	Protein	40	553.25	553.25	0.846	PASS	0.808	0.897	0.862	0.886	0.903	0.911	0.867	0.958	0.851	0.942	0.878	0.953	0.812	0.911	0.845
2741-22_2	SL005217	Sialic acid-binding Ig-like lectin 6	Siglec-6	O43699	946	SIGLEC6	Human	RFU	Protein	40	236.05	236.05	0.839	PASS	0.813	0.705	0.774	0.692	0.791	0.752	0.784	0.776	0.86	0.802	0.706	0.834	0.683	0.716	0.906
2742-68_2	SL005218	Sialic acid-binding Ig-like lectin 7	Siglec-7	Q9Y286	27036	SIGLEC7	Human	RFU	Protein	1	1165.6	1165.6	0.785	PASS	0.794	0.786	0.793	0.716	0.83	0.782	0.93	0.816	0.824	0.854	0.776	0.664	0.669	0.848	0.822
2743-5_2	SL005220	Sonic hedgehog protein	Sonic Hedgehog	Q15465	6469	SHH	Human	RFU	Protein	40	720.9	720.9	1.046	PASS	1.177	1.123	1.097	1.07	1.046	1.063	1.15	1.093	1.147	1.099	1.047	1.072	1.162	1.114	1.309
2744-57_2	SL000467	Immunoglobulin G	IgG	P01857	3500 3501 3502 3503 50802 3535	IGHG1 IGHG2 IGHG3 IGHG4 IGK@ IGL@	Human	RFU	Protein	0.005	200588	200588	1.27	FLAG	1.222	1.218	1.227	1.338	1.021	1.15	1.062	1.008	1.092	0.982	1.27	1.175	1.296	1.224	1.111
2746-56_1	SL005226	Cytokine receptor-like factor 2	TSLP R	Q9HC73	64109	CRLF2	Human	RFU	Protein	40	977.05	977.05	0.799	PASS	0.887	0.918	0.925	0.933	0.99	0.976	0.927	1.022	0.957	1.022	0.898	1.034	0.785	0.934	0.891
2747-3_2	SL005229	NKG2D ligand 3	ULBP-3	Q9BZM4	79465	ULBP3	Human	RFU	Protein	40	534.8	534.8	0.732	PASS	0.763	0.806	0.887	0.889	0.968	0.889	0.908	0.972	0.899	0.984	0.843	0.94	0.692	0.947	0.844
2748-3_2	SL001938	Inhibin beta A chain	Activin A	P08476	3624	INHBA	Human	RFU	Protein	40	2956.45	2956.45	0.673	FLAG	0.619	0.712	0.541	0.703	0.614	0.604	0.711	0.581	0.621	0.649	0.736	0.552	0.771	0.626	0.585
2750-3_2	SL000019	Apolipoprotein A-I	Apo A-I	P02647	335	APOA1	Human	RFU	Protein	0.005	17366.3	17366.3	2.226	FLAG	2.349	1.762	1.858	1.992	2.425	2.359	1.841	1.863	2.163	1.922	2.127	2.119	2.762	1.825	1.717
2751-16_2	SL004589	Azurocidin	Azurocidin	P20160	566	AZU1	Human	RFU	Protein	40	171.75	171.75	0.522	FLAG	0.613	0.639	0.759	0.735	0.926	0.84	0.835	0.882	0.781	0.846	0.636	0.905	0.522	0.754	0.737
2752-62_2	SL004329	Growth/differentiation factor 5	BMP-14	P43026	8200	GDF5	Human	RFU	Protein	40	1666.3	1666.3	2.443	FLAG	2.041	2.273	1.957	2.14	1.861	1.677	2.024	1.665	1.699	1.897	2.195	1.901	2.398	2.068	1.96
2753-2_2	SL000309	Complement C1q subcomponent	C1q	P02745 P02746 P02747	712 713 714	C1QA C1QB C1QC	Human	RFU	Protein	0.005	41190.4	41190.4	1.605	FLAG	1.78	1.552	1.839	1.682	1.521	1.588	1.243	1.455	1.665	1.36	1.565	1.702	1.742	1.503	1.755
2754-50_2	SL000312	Complement C3	C3	P01024	718	C3	Human	RFU	Protein	0.005	61250.4	61250.4	1.456	FLAG	1.673	1.511	1.12	1.589	1.59	1.679	1.235	1.035	1.547	1.419	0.909	1.38	1.431	0.973	1.241
2755-8_2	SL003220	C3a anaphylatoxin des Arginine	C3adesArg	P01024	718	C3	Human	RFU	Protein	0.005	172692	172692	1.084	PASS	1.026	1.035	1.086	1.201	1.095	1.084	1.1	0.881	1.065	0.922	0.975	0.927	1.029	0.985	1.072
2760-2_2	SL004752	Protein FAM107A	DRR1	O95990	11170	FAM107A	Human	RFU	Protein	40	248.4	248.4	0.523	FLAG	0.753	0.638	0.922	0.773	0.872	0.84	0.754	0.881	0.71	0.801	0.636	0.867	0.539	0.707	0.774
2761-49_2	SL004336	Fibroblast growth factor 18	FGF-18	O76093	8817	FGF18	Human	RFU	Protein	40	545.9	545.9	1.359	FLAG	1.406	1.494	1.521	1.491	1.604	1.53	1.475	1.61	1.504	1.68	1.486	1.455	1.211	1.636	1.489
2762-30_2	SL004337	Fibroblast growth factor 19	FGF-19	O95750	9965	FGF19	Human	RFU	Protein	40	11037.5	11037.5	0.989	PASS	0.96	0.933	0.969	0.895	0.909	0.965	0.933	0.928	1.02	0.941	0.899	0.884	0.932	0.959	1.013
2763-66_2	SL004338	Fibroblast growth factor 20	FGF-20	Q9NP95	26281	FGF20	Human	RFU	Protein	40	343.55	343.55	0.617	PASS	0.655	0.717	0.715	0.766	0.795	0.707	0.86	0.758	0.726	0.789	0.724	0.687	0.621	0.734	0.745
2764-20_2	SL003849	Fibroblast growth factor 9	FGF9	P31371	2254	FGF9	Human	RFU	Protein	40	504	504	1.006	FLAG	1.119	1.23	1.334	1.349	1.43	1.28	1.35	1.398	1.265	1.37	1.233	1.308	0.964	1.372	1.316
2765-4_3	SL021043	Growth/differentiation factor 11/8	GDF-11/8	O95390 O14793		GDF11 MSTN	Human	RFU	Protein	1	772.5	772.5	0.92	PASS	1.052	0.934	0.858	0.873	0.916	0.936	0.958	0.921	1.025	0.924	0.915	0.987	0.96	0.942	1.152
2768-56_2	SL000440	Hemopexin	Hemopexin	P02790	3263	HPX	Human	RFU	Protein	0.005	1251.1	1251.1	0.992	PASS	1.019	0.961	1.05	0.972	0.921	0.899	0.978	0.924	0.99	0.934	0.976	1.029	0.968	0.986	1.117
2769-3_2	SL000445	Protein Rev_HV2BE	HIV-2 Rev	P18093	1724716	Human-virus	isolate BEN	RFU	Protein	40	137.9	137.9	0.713	PASS	0.816	0.945	1.078	1.049	1.143	1.034	1.042	1.193	0.895	1.121	0.936	1.103	0.71	1.012	0.971
2770-51_2	SL003176	C-C motif chemokine 1	I-309	P22362	6346	CCL1	Human	RFU	Protein	40	3261.15	3261.15	1.771	FLAG	1.981	1.653	1.581	1.466	1.524	1.9	1.352	1.556	1.969	1.54	1.546	1.923	2	1.592	1.658
2771-35_2	SL000462	Insulin-like growth factor-binding protein 1	IGFBP-1	P08833	3484	IGFBP1	Human	RFU	Protein	1	1228.5	1228.5	0.835	PASS	1.017	0.851	0.85	0.811	0.892	0.853	0.993	0.814	0.866	0.874	0.854	0.773	0.794	0.855	0.861
2773-50_2	SL001717	Interleukin-10	IL-10	P22301	3586	IL10	Human	RFU	Protein	40	243.15	243.15	0.733	PASS	0.989	0.806	0.902	0.859	1.033	0.934	0.917	1.019	0.879	0.953	0.795	1.011	0.796	0.859	0.84
2774-10_3	SL000474	Interleukin-16	IL-16	Q14005	3603	IL16	Human	RFU	Protein	1	277.1	277.1	1.175	PASS	1.228	0.999	1.052	0.949	0.922	0.954	0.94	0.964	0.917	0.935	0.942	1.227	0.942	1.019	1.178
2775-54_2	SL004352	Interleukin-17F	IL-17F	Q96PD4	112744	IL17F	Human	RFU	Protein	40	661.4	661.4	0.923	PASS	1.261	1	1.21	1.054	1.011	1.082	0.98	1.023	0.935	0.988	0.939	1.149	1.059	0.968	1.333
2778-10_2	SL004347	Interleukin-22	IL-22	Q9GZX6	50616	IL22	Human	RFU	Protein	40	744.15	744.15	0.846	PASS	0.825	0.97	0.901	0.951	0.998	0.952	0.993	1.026	0.93	1.045	0.974	0.913	0.774	1.031	0.908
2780-35_2	SL000496	Lactotransferrin	Lactoferrin	P02788	4057	LTF	Human	RFU	Protein	1	39517.6	39517.6	1.113	PASS	1.04	1.038	1.056	1.099	1.034	1.07	0.951	1.056	1.179	1.095	1.045	0.991	1.134	1.101	1.101
2781-63_2	SL004356	C-C motif chemokine 4-like	LAG-1	Q8NHW4	388372	CCL4L1	Human	RFU	Protein	40	417.55	417.55	0.635	FLAG	0.631	0.714	0.704	0.649	0.673	0.662	0.749	0.71	0.659	0.698	0.678	0.598	0.641	0.691	0.681
2783-18_2	SL004355	C-C motif chemokine 3-like 1	LD78-beta	P16619	414062	CCL3L1	Human	RFU	Protein	40	1422.2	1422.2	1.003	PASS	1.17	1.07	1.134	1.042	0.976	1.091	1.026	1.014	0.987	0.979	1.03	1.083	1.05	0.981	1.019
2785-15_2	SL000515	C-C motif chemokine 8	MCP-2	P80075	6355	CCL8	Human	RFU	Protein	40	189.55	189.55	0.586	FLAG	0.7	0.749	0.907	0.838	1.026	0.871	0.92	1	0.823	0.936	0.737	1.046	0.55	0.809	0.788
2788-55_1	SL000524	Stromelysin-1	MMP-3	P08254	4314	MMP3	Human	RFU	Protein	40	471.25	471.25	0.767	PASS	0.698	0.774	0.688	0.698	0.779	0.771	0.634	0.812	0.803	0.842	0.837	0.975	0.804	0.721	0.767
2789-26_2	SL000525	Matrilysin	MMP-7	P09237	4316	MMP7	Human	RFU	Protein	1	1111.05	1111.05	1.26	PASS	1.247	1.249	1.392	1.358	1.249	1.157	1.234	1.268	1.257	1.285	1.288	1.228	1.255	1.343	1.378
2790-54_2	SL003191	Neutrophil-activating peptide 2	NAP-2	P02775	5473	PPBP	Human	RFU	Protein	0.005	7887.9	7887.9	1.787	FLAG	1.794	1.515	2.021	1.667	1.457	1.556	1.165	1.371	1.718	1.366	1.513	2.063	1.712	1.578	2.075
2794-60_2	SL000581	Superoxide dismutase [Cu-Zn]	SOD	P00441	6647	SOD1	Human	RFU	Protein	40	745.4	745.4	0.766	PASS	0.739	0.856	0.793	0.83	0.884	0.812	0.822	0.893	0.771	0.908	0.826	0.803	0.714	0.907	0.763
2796-62_2	SL000424	Fibrinogen	Fibrinogen	P02671 P02675 P02679	2243 2244 2266	FGA FGB FGG	Human	RFU	Protein	0.005	169039	169039	1.34	PASS	1.13	1.203	1.144	1.326	1.054	1.166	1.065	0.966	1.185	0.998	1.285	1.109	1.317	1.164	1.148
2797-56_2	SL000020	Apolipoprotein B	Apo B	P04114	338	APOB	Human	RFU	Protein	40	9475.1	9475.1	1.163	PASS	1.013	1.097	0.759	1.072	0.836	0.76	0.914	0.759	0.878	0.823	1.195	0.894	1.235	0.963	0.901
2805-6_2	SL004415	Angiotensin-converting enzyme 2	ACE2	Q9BYF1	59272	ACE2	Human	RFU	Protein	40	414	414	0.825	PASS	0.868	0.921	1.008	1.007	1.015	0.956	0.919	1.041	0.893	1.003	0.94	1.006	0.819	1.016	0.975
2806-49_2	SL004128	Activin receptor type-1B	Activin RIB	P36896	91	ACVR1B	Human	RFU	Protein	40	218.4	218.4	0.594	FLAG	0.707	0.739	0.955	0.875	0.943	0.922	0.817	0.966	0.802	0.865	0.745	1.045	0.586	0.81	0.809
2809-25_2	SL004625	A disintegrin and metalloproteinase with thrombospondin motifs 4	ADAMTS-4	O75173	9507	ADAMTS4	Human	RFU	Protein	40	161.75	161.75	0.537	FLAG	0.689	0.675	0.847	0.805	0.962	0.793	0.834	0.948	0.763	0.871	0.671	0.867	0.516	0.766	0.736
2811-27_1	SL001995	Angiopoietin-1	Angiopoietin-1	Q15389	284	ANGPT1	Human	RFU	Protein	1	549.15	549.15	1.132	PASS	1.101	1.189	1.053	1.125	1.056	1.101	1.14	1.12	1.08	1.094	1.205	1.054	1.101	1.155	1.085
2813-11_2	SL006924	Agouti-related protein	ART	O00253	181	AGRP	Human	RFU	Protein	40	1949.1	1949.1	0.608	FLAG	0.727	0.677	0.731	0.668	0.685	0.656	0.758	0.708	0.71	0.672	0.668	0.698	0.567	0.704	0.739
2816-50_2	SL001902	Basal Cell Adhesion Molecule	BCAM	P50895	4059	BCAM	Human	RFU	Protein	40	1570.9	1570.9	1.006	PASS	0.986	0.989	0.951	1.007	0.893	0.884	0.946	0.909	0.876	0.983	1.037	0.925	1.003	0.976	1.01
2819-23_2	SL002081	Cadherin-5	Cadherin-5	P33151	1003	CDH5	Human	RFU	Protein	1	12686.8	12686.8	1.013	PASS	1.23	0.949	0.824	0.892	0.884	0.946	0.943	0.88	0.981	0.877	0.993	0.945	1.035	0.797	0.997
2822-56_2	SL004726	CD97 antigen	CD97	P48960	976	CD97	Human	RFU	Protein	40	1557.5	1557.5	0.795	PASS	0.704	0.828	0.823	0.776	0.764	0.98	0.714	0.864	0.817	0.843	0.798	0.817	0.835	0.857	0.729
2823-7_1	SL004704	COMM domain-containing protein 7	COMMD7	Q86VX2	149951	COMMD7	Human	RFU	Protein	40	1314.35	1314.35	1.326	PASS	1.22	1.062	1.026	1.049	0.953	1.04	0.925	1.054	0.989	0.961	1.054	1.35	1.376	0.986	0.98
2826-53_2	SL004644	Ectodysplasin-A; secreted form	EDA	Q92838	1896	EDA	Human	RFU	Protein	40	1731.45	1731.45	1.338	FLAG	1.475	1.189	1.248	1.184	1.147	1.151	1.062	1.197	1.256	1.18	1.226	1.193	1.238	1.187	1.206
2827-23_2	SL000427	Fractalkine	Fractalkine/CX3CL-1	P78423	6376	CX3CL1	Human	RFU	Protein	40	2955.55	2955.55	1.636	FLAG	1.598	1.5	1.428	1.483	1.403	1.613	1.853	1.374	1.521	1.372	1.538	1.333	1.745	1.299	1.423
2828-82_2	SL004645	Kunitz-type protease inhibitor 1	HAI-1	O43278	6692	SPINT1	Human	RFU	Protein	40	6390.05	6390.05	0.883	PASS	0.822	0.804	0.674	0.729	0.695	0.663	0.912	0.637	0.75	0.651	0.784	0.652	0.889	0.632	0.737
2829-19_2	SL006915	Interleukin-27	IL-27	Q8NEV9 Q14213	246778 10148	IL27 EBI3	Human	RFU	Protein	40	582.4	582.4	0.817	PASS	0.848	0.889	0.899	0.887	0.86	0.882	0.885	0.899	0.87	0.919	0.891	0.911	0.84	0.901	0.827
2831-29_1	SL002763	Kallikrein-11	Kallikrein 11	Q9UBX7	11012	KLK11	Human	RFU	Protein	40	988.1	988.1	0.752	PASS	0.851	0.829	0.764	0.768	0.773	0.779	0.875	0.804	0.785	0.862	0.839	0.785	0.773	0.8	0.787
2833-20_1	SL003800	Kallikrein-4	Kallikrein 4	Q9Y5K2	9622	KLK4	Human	RFU	Protein	40	308.6	308.6	1.009	PASS	1.062	1.192	1.264	1.272	1.318	1.211	1.245	1.332	1.221	1.301	1.205	1.225	0.947	1.213	1.194
2834-54_1	SL003915	Kallikrein-8	kallikrein 8	O60259	11202	KLK8	Human	RFU	Protein	40	2827.95	2827.95	0.967	PASS	0.953	0.852	0.818	0.759	0.772	0.846	0.779	0.776	0.82	0.753	0.833	0.746	0.984	0.776	0.79
2835-1_4	SL004301	X-ray repair cross-complementing protein 6	Ku70	P12956	2547	XRCC6	Human	RFU	Protein	40	219.35	219.35	0.911	PASS	0.977	1.049	1.098	1.071	1.231	1.127	1.21	1.191	1.087	1.154	1.041	1.029	0.832	1.023	1.012
2836-68_2	SL000695	Neutrophil gelatinase-associated lipocalin	Lipocalin 2	P80188	3934	LCN2	Human	RFU	Protein	1	14415	14415	0.174	FLAG	0.169	0.175	0.183	0.175	0.166	0.165	0.181	0.161	0.167	0.165	0.172	0.148	0.157	0.192	0.172
2837-3_2	SL000134	Hepatocyte growth factor receptor	Met	P08581	4233	MET	Human	RFU	Protein	1	10001.1	10001.1	0.974	PASS	0.894	0.943	0.771	0.948	0.796	0.731	0.903	0.72	0.883	0.783	0.988	0.755	1.027	0.818	0.887
2838-53_1	SL003332	Matrix metalloproteinase-17	MMP-17	Q9ULZ9	4326	MMP17	Human	RFU	Protein	40	813.65	813.65	1.066	PASS	1.18	0.961	0.891	0.833	0.781	1.044	0.743	0.838	0.854	0.809	0.901	0.928	1.091	0.86	1.062
2839-2_1	SL004649	Tumor necrosis factor ligand superfamily member 4	OX40 Ligand	P23510	7292	TNFSF4	Human	RFU	Protein	40	292.2	292.2	0.798	PASS	0.802	0.915	0.908	0.939	0.852	0.84	0.892	0.911	0.821	0.898	0.912	0.882	0.798	0.921	0.887
2841-13_2	SL004650	Secreted frizzled-related protein 3	sFRP-3	Q92765	2487	FRZB	Human	RFU	Protein	1	2817.45	2817.45	1.615	FLAG	1.745	1.378	1.552	1.21	1.318	1.638	1.109	1.415	1.553	1.271	1.222	1.338	1.551	1.227	1.314
2843-13_2	SL001897	Kunitz-type protease inhibitor 2	SPINT2	O43291	10653	SPINT2	Human	RFU	Protein	40	889.75	889.75	0.723	PASS	0.74	0.795	0.799	0.816	0.868	0.767	0.916	0.837	0.837	0.844	0.813	0.74	0.666	0.779	0.791
2844-53_2	SL003199	Tyrosine-protein kinase receptor Tie-1; soluble	sTie-1	P35590	7075	TIE1	Human	RFU	Protein	1	7699.1	7699.1	0.729	FLAG	0.771	0.755	0.645	0.694	0.715	0.623	0.914	0.636	0.726	0.66	0.755	0.601	0.7	0.678	0.749
2846-24_2	SL000605	Ubiquitin+1; truncated mutation for UbB	Ubiquitin+1	P62979	6233	RPS27A	Human	RFU	Protein	1	1828.2	1828.2	0.718	FLAG	0.729	0.673	0.68	0.652	0.681	0.59	0.91	0.657	0.728	0.667	0.705	0.565	0.598	0.632	0.757
2848-2_2	SL004652	Wnt inhibitory factor 1	WIF-1	Q9Y5W5	11197	WIF1	Human	RFU	Protein	40	3689.45	3689.45	1.427	FLAG	1.631	1.344	1.417	1.213	1.427	1.511	1.269	1.444	1.576	1.451	1.264	1.552	1.239	1.345	1.452
2849-49_1	SL004768	Allograft inflammatory factor 1	AIF1	P55008	199	AIF1	Human	RFU	Protein	1	2103.2	2103.2	1.493	FLAG	1.469	1.469	1.44	1.198	1.207	1.445	1.158	1.389	1.38	1.169	1.337	1.435	1.608	1.317	1.466
2851-63_3	SL000320	C5a anaphylatoxin	C5a	P01031	727	C5	Human	RFU	Protein	1	8424.45	8424.45	1.173	PASS	1.194	0.993	1.084	0.997	0.986	0.935	0.813	0.918	0.906	1.009	1.056	0.96	1.061	0.985	0.928
2853-68_2	SL006911	Serine/threonine-protein kinase Chk1	CHK1	O14757	1111	CHEK1	Human	RFU	Protein	40	490.8	490.8	1.121	FLAG	1.241	1.341	1.454	1.453	1.649	1.686	1.436	1.656	1.49	1.545	1.325	1.553	1.324	1.435	1.305
2855-49_2	SL000409	Mitogen-activated protein kinase 3	ERK-1	P27361	5595	MAPK3	Human	RFU	Protein	40	11050.8	11050.8	1.473	FLAG	1.439	1.158	1.01	1.021	0.978	1.098	0.955	0.99	1.312	1.042	1.092	1.168	1.338	0.984	1.087
2857-70_2	SL006914	Glucocorticoid receptor	Glucocorticoid receptor	P04150	2908	NR3C1	Human	RFU	Protein	1	105.3	105.3	0.943	PASS	1.135	1.024	1.017	1.054	1.12	1.067	1.31	1.202	1.126	1.167	0.969	1.063	0.645	1.118	1.199
2858-29_2	SL004725	Histone acetyltransferase type B catalytic subunit	Hat1	O14929	8520	HAT1	Human	RFU	Protein	40	346	346	1.098	PASS	1.089	1.191	1.106	1.121	1.22	1.178	1.2	1.262	1.218	1.31	1.19	1.084	0.985	1.308	1.169
2859-69_2	SL004723	Histone deacetylase 8	HDAC8	Q9BY41	55869	HDAC8	Human	RFU	Protein	40	1487.7	1487.7	0.981	PASS	0.999	0.923	1.022	0.906	0.964	1.104	0.855	0.947	0.926	0.901	0.852	1.162	0.913	0.849	0.948
2860-19_2	SL004718	Importin subunit alpha-1	Karyopherin-a2	P52292	3838	KPNA2	Human	RFU	Protein	40	255.5	255.5	0.59	FLAG	0.609	0.711	0.762	0.758	0.826	0.764	0.793	0.837	0.711	0.795	0.694	0.793	0.599	0.741	0.702
2864-2_3	SL003793	Dual specificity mitogen-activated protein kinase kinase 1	MEK1	Q02750	5604	MAP2K1	Human	RFU	Protein	40	328.25	328.25	0.526	FLAG	0.555	0.68	0.688	0.733	0.731	0.687	0.704	0.734	0.631	0.685	0.677	0.722	0.57	0.668	0.633
2865-77_2	SL004724	Histone acetyltransferase KAT6A	MOZ	Q92794	7994	KAT6A	Human	RFU	Protein	40	1201.4	1201.4	0.995	PASS	0.912	1.056	1.089	1.09	1.004	1.122	0.965	1.099	0.976	1.097	1.044	1.115	1.043	1.092	0.937
2869-68_3	SL000554	Protein kinase C delta type	PKC-D	Q05655	5580	PRKCD	Human	RFU	Protein	40	2886.55	2886.55	0.701	PASS	0.654	0.785	0.663	0.779	0.729	0.679	0.708	0.723	0.648	0.71	0.794	0.704	0.698	0.815	0.634
2870-29_2	SL004009	Ras-related C3 botulinum toxin substrate 1	RAC1	P63000	5879	RAC1	Human	RFU	Protein	1	11123.4	11123.4	1.069	PASS	1.146	1.047	1.079	1.035	1.066	1.068	1.054	1.152	1.15	1.17	1.053	0.949	1	1.107	1.118
2871-73_2	SL006922	DNA repair protein RAD51 homolog 1	RAD51	Q06609	5888	RAD51	Human	RFU	Protein	40	2270	2270	1.22	FLAG	1.047	1.222	1.337	1.174	1.059	1.428	0.96	1.174	1.137	1.115	1.138	1.282	1.443	1.208	1.08
2875-15_2	SL006923	TATA-box-binding protein	TBP	P20226	6908	TBP	Human	RFU	Protein	40	511.1	511.1	0.818	PASS	1.015	0.893	0.948	0.892	0.977	0.935	0.999	1.003	0.947	0.988	0.898	0.957	0.774	0.943	0.962
2876-74_2	SL004305	DNA topoisomerase 1	Topoisomerase I	P11387	7150	TOP1	Human	RFU	Protein	40	480.2	480.2	0.725	PASS	0.79	0.883	0.927	0.89	0.901	0.928	0.87	0.952	0.883	0.949	0.856	0.936	0.756	0.88	0.847
2877-3_1	SL004306	SUMO-conjugating enzyme UBC9	UBC9	P63279	7329	UBE2I	Human	RFU	Protein	1	1192.65	1192.65	1.129	PASS	1.099	1.206	1.132	1.136	1.03	1.088	1.027	1.164	1.157	1.133	1.198	1.023	1.074	1.257	1.221
2878-66_2	SL006372	Tyrosine-protein kinase Yes	YES	P07947	7525	YES1	Human	RFU	Protein	40	656.6	656.6	0.742	PASS	0.834	0.798	0.776	0.824	0.757	0.748	0.858	0.872	0.758	0.767	0.817	0.971	0.875	0.771	0.751
2879-9_2	SL000248	Alpha-1-antichymotrypsin	a1-Antichymotrypsin	P01011	12	SERPINA3	Human	RFU	Protein	0.005	254676	254676	1.017	PASS	1.013	1.03	1.049	1.103	0.841	0.977	0.893	0.805	0.801	0.79	1.015	0.979	1.045	1.028	0.953
2888-49_2	SL000323	Complement component C7	C7	P10643	730	C7	Human	RFU	Protein	0.005	1229.9	1229.9	1.049	PASS	0.959	1.049	0.867	0.96	0.917	0.903	1.206	0.867	1.034	0.935	1.118	0.79	1.046	0.889	0.887
2889-37_2	SL002783	Cardiotrophin-1	Cardiotrophin-1	Q16619	1489	CTF1	Human	RFU	Protein	40	553.25	553.25	0.728	PASS	0.787	0.818	0.911	0.852	0.904	0.864	0.857	0.954	0.805	0.869	0.79	1.2	0.691	0.829	0.8
2890-59_2	SL003303	C-C motif chemokine 28	CCL28	Q9NRJ3	56477	CCL28	Human	RFU	Protein	40	7081.35	7081.35	1.103	PASS	1.101	0.992	1.049	1.008	0.892	0.933	0.833	0.926	0.999	0.887	0.953	1.133	1.124	0.97	1.086
2891-1_3	SL004330	B-cell receptor CD22	CD22	P20273	933	CD22	Human	RFU	Protein	40	679.2	679.2	1.143	PASS	1.185	1.113	1.175	1.122	1.083	1.174	1.05	1.152	1.08	1.152	1.095	1.24	1.19	1.117	0.999
2900-53_3	SL003329	C-C motif chemokine 14	HCC-1	Q16627	6358	CCL14	Human	RFU	Protein	1	5167.15	5167.15	1.005	FLAG	1.152	0.702	0.701	0.617	0.667	0.688	0.915	0.547	0.967	0.542	0.722	0.697	0.91	0.589	1.039
2906-55_3	SL000480	Interleukin-4	IL-4	P05112	3565	IL4	Human	RFU	Protein	40	363.65	363.65	0.819	PASS	0.899	0.935	1.007	0.991	1.04	0.974	0.981	1.074	0.934	1.037	0.941	1.024	0.809	1.037	0.928
2911-27_2	SL002621	Midkine	Midkine	P21741	4192	MDK	Human	RFU	Protein	40	20203.3	20203.3	1.45	FLAG	1.513	1.311	1.382	1.194	1.389	1.411	1.209	1.513	1.634	1.382	1.252	1.247	1.392	1.358	1.367
2913-1_2	SL003302	C-C motif chemokine 23	MPIF-1	P55773	6368	CCL23	Human	RFU	Protein	1	2765.8	2765.8	1.011	PASS	0.932	0.895	0.945	0.821	0.832	0.855	0.865	0.871	0.901	0.853	0.834	0.925	0.968	0.884	0.946
2915-6_2	SL000131	Proliferating cell nuclear antigen	PCNA	P12004	5111	PCNA	Human	RFU	Protein	40	190.8	190.8	0.637	PASS	0.693	0.738	0.775	0.771	0.827	0.772	0.812	0.819	0.784	0.83	0.742	0.817	0.596	0.79	0.743
2917-3_2	SL002541	Tumor necrosis factor ligand superfamily member 11	sRANKL	O14788	8600	TNFSF11	Human	RFU	Protein	40	500.7	500.7	1.003	PASS	1.093	1.115	1.225	1.156	1.037	1.129	1.019	1.113	1.01	1.105	1.092	1.163	1.013	1.107	1.046
2925-9_1	SL000006	Plasminogen activator inhibitor 1	PAI-1	P05121	5054	SERPINE1	Human	RFU	Protein	1	1197.8	1197.8	0.929	PASS	1.162	0.924	0.638	0.845	0.829	0.799	0.968	0.652	0.824	0.754	1.029	0.781	0.983	0.671	0.711
2937-10_2	SL004668	Apolipoprotein E (isoform E3)	Apo E3	P02649	348	APOE	Human	RFU	Protein	0.005	241183	241183	2.112	FLAG	1.673	1.766	1.707	1.764	1.479	1.706	1.204	1.511	1.82	1.607	1.815	1.944	2.388	1.645	1.819
2938-55_2	SL004669	Apolipoprotein E (isoform E4)	Apo E4	P02649	348	APOE	Human	RFU	Protein	0.005	249428	249428	1.765	FLAG	1.314	1.546	1.455	1.665	1.229	1.429	1.083	1.247	1.464	1.308	1.58	1.556	1.883	1.442	1.548
2939-10_2	SL004670	Artemin	Artemin	Q5T4W7	9048	ARTN	Human	RFU	Protein	40	684.95	684.95	0.869	PASS	0.824	0.929	0.872	0.924	0.975	0.924	0.943	0.961	0.974	0.972	0.976	0.892	0.827	0.952	0.898
2942-50_2	SL000396	Cytochrome c	Cytochrome c	P99999	54205	CYCS	Human	RFU	Protein	40	2016.35	2016.35	0.918	PASS	0.871	0.963	0.844	0.903	0.882	0.844	0.916	0.94	0.897	0.951	0.933	0.834	0.882	0.98	0.862
2943-5_2	SL000398	Cytochrome P450 3A4	Cytochrome P450 3A4	P08684	1576	CYP3A4	Human	RFU	Protein	1	9437.8	9437.8	1.252	PASS	1.151	1.075	0.978	1.028	1.11	1.079	0.965	0.949	1.17	0.944	1.13	0.936	1.194	0.969	1.053
2944-66_2	SL005156	Neuroblastoma suppressor of tumorigenicity 1	DAN	P41271	4681	NBL1	Human	RFU	Protein	40	746.1	746.1	0.606	PASS	0.607	0.709	0.641	0.741	0.616	0.637	0.616	0.675	0.616	0.662	0.675	0.659	0.664	0.668	0.637
2945-25_1	SL000007	Estrogen receptor	ER	P03372	2099	ESR1	Human	RFU	Protein	40	633.2	633.2	0.774	PASS	0.839	0.971	1.03	1.067	1.017	0.94	1.024	1.025	0.938	1.027	0.993	1.054	0.784	1.044	0.995
2946-52_2	SL003327	Complement factor D	Factor D	P00746	1675	CFD	Human	RFU	Protein	0.005	1007.65	1007.65	1.69	FLAG	1.629	1.161	1.931	1.065	1.054	1.286	1.052	1.354	1.315	1.063	1.159	2.284	1.642	1.151	1.175
2948-58_2	SL005168	Growth hormone receptor	Growth hormone receptor	P10912	2690	GHR	Human	RFU	Protein	1	1344.75	1344.75	1.057	PASS	0.957	1.06	0.922	0.925	1.033	1.034	1.027	1.1	1.056	1.138	1.024	0.893	1.002	1.011	0.907
2949-6_2	SL004067	Group 10 secretory phospholipase A2	GX	O15496	8399	PLA2G10	Human	RFU	Protein	40	524.35	524.35	0.781	PASS	1.067	0.881	0.952	0.873	1.04	1.009	1	1.067	1.125	1.022	0.851	0.983	0.81	0.953	1
2950-57_2	SL005171	Insulin-like growth factor-binding protein 4	IGFBP-4	P22692	3487	IGFBP4	Human	RFU	Protein	0.005	6527.05	6527.05	2.135	FLAG	1.595	1.896	1.574	1.619	1.722	1.775	1.4	1.762	1.973	1.95	2.168	1.733	2.105	1.602	1.84
2952-75_2	SL000047	Insulin-like growth factor I	IGF-I	P05019	3479	IGF1	Human	RFU	Protein	0.005	903.9	903.9	1.111	FLAG	1.469	0.981	1.095	0.977	1.094	1.274	1.1	1.268	1.117	1.09	1.076	1.295	1.257	1.029	1.009
2953-31_2	SL000506	Luteinizing hormone	Luteinizing hormone	P01215; P01229	1081 3972	CGA LHB	Human	RFU	Protein	1	890.95	890.95	0.782	PASS	0.783	0.809	0.706	0.769	0.822	0.773	0.837	0.826	0.868	0.842	0.821	0.703	0.774	0.847	0.764
2960-66_2	SL003192	Properdin	Properdin	P27918	5199	CFP	Human	RFU	Protein	0.005	116922	116922	0.683	FLAG	0.53	0.726	0.574	0.683	0.463	0.586	0.465	0.531	0.618	0.542	0.651	0.619	1.077	0.62	0.536
2961-1_2	SL000048	Vitamin K-dependent protein C	Protein C	P04070	5624	PROC	Human	RFU	Protein	0.005	1453.8	1453.8	1.096	PASS	0.962	1.018	0.887	1.042	1.094	1.058	1.076	0.979	1.108	1.225	1.071	0.934	1.156	1.007	0.925
2962-50_2	SL002561	Parathyroid hormone-related protein	PTHrP	P12272	5744	PTHLH	Human	RFU	Protein	40	738.85	738.85	0.752	PASS	1.002	0.81	0.787	0.796	0.833	0.843	0.811	0.857	0.816	0.845	0.8	0.884	0.761	0.823	0.81
2966-65_2	SL004362	Stem Cell Growth Factor-beta	SCGF-beta	Q9Y240	6320	CLEC11A	Human	RFU	Protein	1	984	984	1.202	PASS	1.122	1.147	1.012	1.049	0.936	0.979	1.003	0.929	0.998	0.951	1.147	0.947	1.119	0.972	1.004
2967-8_1	SL001720	Vascular cell adhesion protein 1	VCAM-1	P19320	7412	VCAM1	Human	RFU	Protein	1	11114	11114	1.239	PASS	1.239	1.19	0.99	0.974	0.976	1.024	1.101	0.938	1.11	0.862	1.104	0.956	1.303	0.886	1.071
2968-61_1	SL004686	Tumor necrosis factor ligand superfamily member 15	TNFSF15	O95150	9966	TNFSF15	Human	RFU	Protein	40	651.3	651.3	0.572	FLAG	0.584	0.695	0.697	0.727	0.663	0.613	0.656	0.658	0.638	0.639	0.703	0.62	0.56	0.634	0.676
2969-11_1	SL004851	Serine/threonine-protein kinase receptor R3	ALK-1	P37023	94	ACVRL1	Human	RFU	Protein	40	1201.45	1201.45	0.969	PASS	1.037	1.021	1.031	0.988	0.971	1.014	0.954	0.988	1.098	0.975	0.978	1.213	1.074	0.972	1.029
2970-60_2	SL000136	Amphiregulin	AREG	P15514	374	AREG	Human	RFU	Protein	40	1474.5	1474.5	1.079	PASS	0.947	0.974	0.86	0.895	0.896	0.989	0.841	0.954	1.041	1.006	0.954	0.875	0.97	1.039	0.924
2972-57_2	SL004078	Bone morphogenetic protein 7	BMP-7	P18075	655	BMP7	Human	RFU	Protein	40	474.25	474.25	0.924	PASS	0.931	1.018	0.954	1.092	0.888	0.892	0.996	0.896	0.944	0.909	1.032	0.937	0.974	0.99	0.994
2973-15_2	SL000668	Platelet glycoprotein 4	CD36 ANTIGEN	P16671	948	CD36	Human	RFU	Protein	40	13013.2	13013.2	0.905	PASS	0.824	0.838	0.733	0.806	0.7	0.683	0.853	0.689	0.824	0.752	0.816	0.734	0.9	0.795	0.852
2974-61_2	SL004855	Contactin-1	contactin-1	Q12860	1272	CNTN1	Human	RFU	Protein	0.005	292.6	292.6	0.99	PASS	0.933	0.889	0.859	0.907	0.856	0.872	0.922	0.829	0.912	0.876	0.95	0.827	0.982	0.9	0.936
2975-19_2	SL002655	Connective tissue growth factor	CTGF	P29279	1490	CTGF	Human	RFU	Protein	40	995.8	995.8	0.886	PASS	0.885	0.945	0.857	0.919	0.983	0.922	0.991	0.913	0.957	1.015	0.992	0.823	0.866	0.947	0.858
2976-58_2	SL004856	Desmoglein-1	Desmoglein-1	Q02413	1828	DSG1	Human	RFU	Protein	40	2080.35	2080.35	0.801	PASS	0.762	0.804	0.773	0.785	0.772	0.858	0.773	0.823	0.827	0.774	0.783	0.863	0.883	0.748	0.75
2977-7_2	SL004872	Tumor necrosis factor receptor superfamily member EDAR	EDAR	Q9UNE0	10913	EDAR	Human	RFU	Protein	40	649.2	649.2	0.599	FLAG	0.624	0.683	0.597	0.595	0.62	0.606	0.715	0.671	0.643	0.675	0.635	0.584	0.549	0.671	0.604
2979-8_2	SL003169	C-X-C motif chemokine 5	ENA-78	P42830	6374	CXCL5	Human	RFU	Protein	40	423.45	423.45	0.796	PASS	0.778	0.862	0.981	0.941	0.984	0.881	0.954	0.975	0.899	0.971	0.889	0.957	0.729	0.924	0.844
2981-9_3	SL005160	Endothelial cell-selective adhesion molecule	ESAM	Q96AP7	90952	ESAM	Human	RFU	Protein	1	3045.7	3045.7	0.754	PASS	0.814	0.764	0.839	0.759	0.863	0.78	0.845	0.805	0.745	0.795	0.739	0.768	0.713	0.804	0.836
2982-82_2	SL005165	Galectin-4	Galectin-4	P56470	3960	LGALS4	Human	RFU	Protein	40	473.2	473.2	0.659	PASS	0.937	0.755	0.854	0.84	0.954	0.895	0.844	0.952	0.847	0.9	0.761	0.955	0.805	0.833	0.876
2985-35_1	SL003173	Growth-regulated alpha protein	Gro-a	P09341	2919	CXCL1	Human	RFU	Protein	40	3315.95	3315.95	0.986	PASS	1.015	0.968	0.926	0.865	0.866	0.908	0.983	0.854	0.96	0.868	0.895	0.934	1.004	0.863	1.022
2986-49_2	SL017610	Gro-beta/gamma	Gro-b/g	P19876 P19875		CXCL3 CXCL2	Human	RFU	Protein	1	559.55	559.55	0.914	PASS	0.937	0.952	0.923	0.919	1.001	1.002	1.025	1.018	1.058	1.051	0.938	0.899	0.864	1.048	0.946
2987-37_3	SL005256	Histone H1.2	Histone H1.2	P16403	3006	HIST1H1C	Human	RFU	Protein	40	1024.95	1024.95	1.092	PASS	1.089	0.935	1.041	0.933	1.01	1.091	1.002	0.968	1.073	1.083	1.084	1.282	0.944	1.007	1.063
2988-57_2	SL005170	Inducible T-cell costimulator	ICOS	Q9Y6W8	29851	ICOS	Human	RFU	Protein	40	1279.85	1279.85	1.147	PASS	1.196	1.194	1.239	1.225	1.216	1.209	1.227	1.265	1.223	1.316	1.208	1.229	1.144	1.253	1.15
2991-9_2	SL001997	Interleukin-1 receptor type 1	IL-1 sRI	P14778	3554	IL1R1	Human	RFU	Protein	40	8247.45	8247.45	1.322	FLAG	1.555	1.154	1.31	1.042	0.995	1.243	0.89	1.027	1.515	0.965	1.036	1.38	1.56	1.057	1.56
2992-59_2	SL004850	Interleukin-17 receptor A	IL-17 sR	Q96F46	23765	IL17RA	Human	RFU	Protein	1	757.35	757.35	1.168	FLAG	1.56	0.953	0.933	0.79	0.989	1.06	0.996	1.04	1.281	0.979	0.883	1.493	1.288	0.932	1.166
2993-1_2	SL004861	Interleukin-18 receptor accessory protein	IL-18 Rb	O95256	8807	IL18RAP	Human	RFU	Protein	40	227.85	227.85	0.624	PASS	0.688	0.681	0.863	0.805	0.953	0.889	0.823	0.942	0.921	0.868	0.668	1.3	0.641	0.756	0.793
2994-71_2	SL004875	Interleukin-1 receptor-like 2	IL-1Rrp2	Q9HB29	8808	IL1RL2	Human	RFU	Protein	40	647.45	647.45	0.717	PASS	0.791	0.785	0.822	0.833	0.84	0.84	0.832	0.878	0.793	0.854	0.767	0.911	0.74	0.802	0.806
2997-8_1	SL005193	Junctional adhesion molecule B	JAM-B	P57087	58494	JAM2	Human	RFU	Protein	40	7283.65	7283.65	1.23	PASS	1.238	1.127	1.121	1.018	1.084	1.203	1.21	1.003	1.163	1.035	1.085	1.04	1.176	1.004	1.164
2998-53_2	SL005194	Junctional adhesion molecule C	JAM-C	Q9BX67	83700	JAM3	Human	RFU	Protein	40	2702.45	2702.45	0.824	PASS	0.782	0.841	0.788	0.781	0.795	0.794	0.815	0.823	0.794	0.866	0.834	0.735	0.801	0.866	0.821
2999-6_2	SL005196	Limbic system-associated membrane protein	LSAMP	Q13449	4045	LSAMP	Human	RFU	Protein	1	1574.7	1574.7	1.395	FLAG	1.823	1.221	1.21	1.189	1.051	1.125	1.113	1.117	1.219	1.155	1.253	1.272	1.269	1.183	1.188
3000-66_1	SL004516	Mannose-binding protein C	MBL	P11226	4153	MBL2	Human	RFU	Protein	1	14084.9	14084.9	0.965	PASS	0.848	0.847	0.729	0.784	0.772	0.818	0.763	0.759	0.822	0.813	0.96	0.676	0.991	0.84	0.773
3003-29_2	SL005205	Natural cytotoxicity triggering receptor 3	NKp30	O14931	259197	NCR3	Human	RFU	Protein	40	492.7	492.7	0.777	PASS	0.841	0.9	0.954	0.935	0.973	0.906	0.946	0.985	0.908	0.972	0.867	0.953	0.749	0.957	0.913
3004-67_2	SL004862	Programmed cell death 1 ligand 2	PD-L2	Q9BQ51	80380	PDCD1LG2	Human	RFU	Protein	40	2972.6	2972.6	0.55	FLAG	0.567	0.573	0.485	0.583	0.486	0.495	0.65	0.493	0.502	0.569	0.549	0.46	0.614	0.492	0.497
3005-5_2	SL004939	Tyrosine-protein phosphatase non-receptor type 1	PTP-1B	P18031	5770	PTPN1	Human	RFU	Protein	1	1926.6	1926.6	1.529	FLAG	1.642	1.641	1.497	1.556	1.388	1.533	1.305	1.411	1.507	1.328	1.538	1.743	1.785	1.523	1.47
3007-7_2	SL005219	Sialic acid-binding Ig-like lectin 9	Siglec-9	Q9Y336	27180	SIGLEC9	Human	RFU	Protein	40	13559.6	13559.6	0.853	PASS	0.821	0.8	0.777	0.758	0.77	0.771	0.775	0.761	0.84	0.788	0.748	0.772	0.793	0.8	0.822
3009-3_2	SL005059	Transforming growth factor beta receptor type 3	TGF-b R III	Q03167	7049	TGFBR3	Human	RFU	Protein	1	30269.6	30269.6	1.196	PASS	1.118	1.014	1.134	0.969	1.086	1.142	0.962	1.062	1.157	0.993	1.005	1.058	1.129	1.067	1.129
3010-53_2	SL004687	Thymic stromal lymphopoietin	TSLP	Q969D9	85480	TSLP	Human	RFU	Protein	40	278.7	278.7	0.637	PASS	0.693	0.755	0.808	0.813	0.913	0.849	0.855	0.926	0.806	0.916	0.761	0.958	0.619	0.834	0.764
3022-4_2	SL000384	Cytotoxic T-lymphocyte protein 4	CTLA-4	P16410	1493	CTLA4	Human	RFU	Protein	40	84.75	84.75	0.64	PASS	0.712	0.79	0.989	0.929	0.981	0.877	0.934	0.976	0.803	0.92	0.78	1.05	0.644	0.871	0.844
3024-18_2	SL000250	Alpha-2-antiplasmin	a2-Antiplasmin	P08697	5345	SERPINF2	Human	RFU	Protein	0.005	1957.65	1957.65	1.183	PASS	1.21	1.125	1.01	1.114	1.25	1.27	1.255	1.078	1.154	1.22	1.267	1.095	1.156	1.062	1.001
3025-50_1	SL000004	Fibroblast growth factor 2	bFGF	P09038	2247	FGF2	Human	RFU	Protein	40	2622.65	2622.65	1.232	FLAG	1.267	0.999	0.947	0.865	0.724	1.028	0.795	0.776	0.905	0.786	0.983	1.199	1.411	0.904	1.181
3026-5_2	SL000338	Calpastatin	Calpastatin	P20810	831	CAST	Human	RFU	Protein	1	7039.3	7039.3	0.703	PASS	0.719	0.644	0.725	0.664	1.142	1.181	1.111	1.079	1.303	1.216	0.661	0.686	0.711	0.644	0.892
3028-36_2	SL003301	Ck-beta-8-1	Ck-b-8-1	P55773	6368	CCL23	Human	RFU	Protein	40	57427.6	57427.6	0.949	PASS	0.9	0.921	0.949	0.946	0.883	0.909	0.909	0.847	0.909	0.876	0.894	0.833	0.904	0.98	0.894
3029-52_2	SL005157	CD209 antigen	DC-SIGN	Q9NNX6	30835	CD209	Human	RFU	Protein	1	1507	1507	1.09	PASS	1.015	1.129	0.986	1.204	1.105	1.076	1.046	1.014	1.07	1.084	1.219	1.001	1.192	1.095	1.039
3030-3_2	SL005158	C-type lectin domain family 4 member M	DC-SIGNR	Q9H2X3	10332	CLEC4M	Human	RFU	Protein	1	36950.1	36950.1	1.737	FLAG	1.555	1.492	1.507	1.487	1.125	1.345	1.214	1.237	1.318	1.15	1.553	1.352	1.862	1.441	1.432
3032-11_2	SL000428	Follicle stimulating hormone	FSH	P01215; P01225	1081 2488	CGA FSHB	Human	RFU	Protein	1	1379	1379	0.93	PASS	0.968	0.974	0.955	0.93	1.091	0.99	1.262	0.96	0.963	1.044	0.965	0.815	0.846	1.004	0.955
3033-57_1	SL005164	Galectin-2	Galectin-2	P05162	3957	LGALS2	Human	RFU	Protein	40	1687.5	1687.5	1.037	PASS	0.965	1.016	0.965	1.005	0.98	0.95	0.96	0.957	1.023	1.047	1.071	0.946	0.912	1.112	1.032
3034-1_2	SL004271	Glial fibrillary acidic protein	GFAP	P14136	2670	GFAP	Human	RFU	Protein	40	476.05	476.05	0.803	PASS	0.831	0.923	0.985	0.968	0.965	0.872	0.961	0.941	0.884	0.966	0.957	0.971	0.823	0.947	0.917
3035-80_2	SL004354	Interleukin-19	IL-19	Q9UHD0	29949	IL19	Human	RFU	Protein	1	6270.5	6270.5	1.966	FLAG	2.063	1.689	1.53	1.762	1.351	1.483	1.258	1.326	1.62	1.471	1.856	2.105	2.715	1.618	2.142
3037-62_1	SL001795	Interleukin-1 beta	IL-1b	P01584	3553	IL1B	Human	RFU	Protein	40	2091.8	2091.8	0.688	PASS	0.77	0.842	0.904	1.043	0.912	0.841	0.796	0.876	0.766	0.847	0.824	1.032	0.784	0.832	0.822
3038-9_2	SL003326	C-X-C motif chemokine 11	I-TAC	O14625	6373	CXCL11	Human	RFU	Protein	40	2119.45	2119.45	0.755	PASS	0.741	0.8	0.752	0.779	0.681	0.709	0.763	0.695	0.71	0.744	0.784	0.645	0.746	0.788	0.733
3040-59_1	SL000519	C-C motif chemokine 3	MIP-1a	P10147	6348	CCL3	Human	RFU	Protein	40	849.35	849.35	1.243	FLAG	1.462	1.167	0.873	0.869	0.883	1.056	1.404	0.865	0.943	0.845	1.143	0.969	1.233	0.817	1.261
3041-55_2	SL008416	C-type mannose receptor 2	MRC2	Q9UBG0	9902	MRC2	Human	RFU	Protein	1	3392.75	3392.75	1.094	PASS	1.052	1.057	1.076	0.973	1	1.068	0.967	0.964	1.01	0.953	1.032	1.116	1.11	0.98	1.074
3042-7_2	SL000164	Myoglobin	Myoglobin	P02144	4151	MB	Human	RFU	Protein	1	1300.9	1300.9	1.341	FLAG	1.406	1.419	1.181	1.363	1.486	1.424	1.5	1.247	1.307	1.448	1.431	1.08	1.333	1.234	1.12
3043-49_2	SL000532	SPARC	ON	P09486	6678	SPARC	Human	RFU	Protein	1	20490.7	20490.7	0.997	PASS	1.094	0.956	0.893	0.966	0.884	0.87	0.844	0.802	0.863	0.778	0.97	0.996	1.111	0.829	0.93
3044-3_2	SL003323	C-C motif chemokine 18	PARC	P55774	6362	CCL18	Human	RFU	Protein	0.005	5681.35	5681.35	1.444	FLAG	1.192	1.325	1.283	1.155	1.308	1.507	1.35	1.66	1.692	1.582	1.352	1.328	1.582	1.121	1.636
3045-72_2	SL002704	Pleiotrophin	PTN	P21246	5764	PTN	Human	RFU	Protein	1	985.65	985.65	1.183	PASS	1.147	1.267	1.244	1.153	1.243	1.282	1.349	1.321	1.312	1.305	1.218	1.127	1.18	1.188	1.334
3046-31_1	SL004260	Resistin	resistin	Q9HD89	56729	RETN	Human	RFU	Protein	1	979.8	979.8	0.942	PASS	0.898	0.91	0.803	0.848	0.724	0.698	0.837	0.693	0.755	0.697	0.939	0.735	1.007	0.858	0.895
3049-61_2	SL000603	Trypsin-1	Trypsin	P07477	5644	PRSS1	Human	RFU	Protein	1	8122.9	8122.9	1.022	PASS	0.999	0.963	1.002	0.947	0.974	0.974	1.118	0.942	1.019	0.993	1.049	0.89	0.982	1.004	0.971
3050-7_2	SL000017	von Willebrand factor	vWF	P04275	7450	VWF	Human	RFU	Protein	0.005	20161.2	20161.2	2.515	FLAG	1.869	2.356	2.081	2.373	1.368	1.847	1.213	1.694	1.806	1.624	2.825	2.254	3.151	1.589	1.569
3052-8_2	SL000633	Tumor necrosis factor ligand superfamily member 6; soluble form	Fas ligand; soluble	P48023	356	FASLG	Human	RFU	Protein	40	571.3	571.3	0.789	PASS	0.754	0.9	0.787	0.876	0.772	0.731	0.871	0.807	0.779	0.762	0.895	0.792	0.816	0.791	0.776
3053-49_2	SL004343	Fms-related tyrosine kinase 3 ligand	Flt3 ligand	P49771	2323	FLT3LG	Human	RFU	Protein	40	1112.2	1112.2	1.173	PASS	1.161	1.137	1.107	1.074	1.002	1.097	0.976	0.976	1.062	1.073	1.134	1.188	1.099	1.038	1.061
3054-3_2	SL000437	Haptoglobin	Haptoglobin; Mixed Type	P00738	3240	HP	Human	RFU	Protein	0.005	26365.5	26365.5	1.297	PASS	1.195	1.164	1.116	1.107	1.299	1.316	1.076	1.021	1.269	1.038	1.186	1.211	1.263	1.03	1.061
3055-54_2	SL003308	Interleukin-4 receptor subunit alpha	IL-4 sR	P24394	3566	IL4R	Human	RFU	Protein	40	217.5	217.5	0.697	PASS	0.876	0.796	0.947	0.894	0.994	0.904	0.931	0.96	0.87	0.916	0.827	0.945	0.655	0.833	0.835
3056-11_1	SL005204	NKG2-D type II integral membrane protein	NKG2D	P26718	22914	KLRK1	Human	RFU	Protein	40	524.1	524.1	1.036	PASS	1.006	1.103	0.821	0.954	0.893	0.834	1.109	0.831	0.892	0.857	1.106	0.826	1.037	0.887	0.913
3057-55_1	SL004689	WNT1-inducible-signaling pathway protein 1	WISP-1	O95388	8840	WISP1	Human	RFU	Protein	0.005	4399.15	4399.15	1.637	FLAG	1.395	1.431	1.16	1.466	1.092	1.226	1.189	1.114	1.292	1.142	1.806	1.341	1.947	1.296	1.362
3059-50_2	SL004327	Tumor necrosis factor ligand superfamily member 13B	BAFF	Q9Y275	10673	TNFSF13B	Human	RFU	Protein	40	1057.4	1057.4	0.557	FLAG	0.556	0.665	0.571	0.662	0.549	0.54	0.778	0.533	0.518	0.532	0.665	0.506	0.656	0.541	0.562
3060-43_2	SL000325	Complement component C9	C9	P02748	735	C9	Human	RFU	Protein	0.005	63623.8	63623.8	1.106	PASS	1.04	1.067	1.085	1.148	0.996	1.005	0.982	0.944	1.011	0.97	1.06	0.97	1.114	1.082	1.066
3061-61_2	SL000343	Cathepsin B	Cathepsin B	P07858	1508	CTSB	Human	RFU	Protein	1	1222.6	1222.6	1.227	PASS	1.097	1.158	1.032	1.151	1.036	1.031	1.056	0.938	1.004	1.005	1.23	0.964	1.262	1.066	1.052
3065-65_1	SL004339	Fibroblast growth factor 5	FGF-5	P12034	2250	FGF5	Human	RFU	Protein	40	692.55	692.55	1.181	PASS	1.124	1.104	1.124	1.044	0.871	0.884	0.933	0.948	0.935	0.92	1.112	1.376	1.315	1.095	1.113
3066-12_1	SL003744	Galectin-3	Galectin-3	P17931	3958	LGALS3	Human	RFU	Protein	1	19949.3	19949.3	1.122	PASS	1.21	1.168	1.175	1.339	1.101	1.144	1.174	0.94	1.085	0.885	1.336	1.109	1.011	1.124	1.342
3067-67_1	SL005234	Growth/differentiation factor 9	GDF-9	O60383	2661	GDF9	Human	RFU	Protein	40	369.25	369.25	1.601	FLAG	1.488	1.428	1.595	1.08	1.008	1.04	1.065	1.005	1.232	1.028	1.205	1.531	1.454	1.176	1.484
3069-52_3	SL000468	Immunoglobulin M	IgM	P01871	3507 3512 50802 3535	IGHM IGJ IGK@ IGL@	Human	RFU	Protein	0.005	3730.7	3730.7	1.755	FLAG	1.391	1.531	1.383	1.6	1.506	1.668	1.274	1.376	1.633	1.489	1.736	1.525	1.754	1.37	1.483
3070-1_2	SL000478	Interleukin-2	IL-2	P60568	3558	IL2	Human	RFU	Protein	40	1406.1	1406.1	0.842	PASS	0.9	0.928	0.684	0.886	0.82	0.809	1.033	0.738	0.77	0.808	0.989	0.7	1.202	0.672	0.908
3072-4_2	SL001718	Interleukin-13	IL-13	P35225	3596	IL13	Human	RFU	Protein	40	661.7	661.7	1.395	FLAG	1.402	1.348	1.383	1.227	1.129	1.477	1.128	1.117	1.203	1.142	1.29	1.24	1.732	1.22	1.521
3073-51_2	SL002508	Interleukin-18-binding protein	IL-18 BPa	O95998	10068	IL18BP	Human	RFU	Protein	40	7895.85	7895.85	0.631	FLAG	0.637	0.696	0.511	0.583	0.495	0.462	0.877	0.449	0.541	0.476	0.694	0.459	0.674	0.502	0.604
3074-6_2	SL003309	Lipopolysaccharide-binding protein	LBP	P18428	3929	LBP	Human	RFU	Protein	0.005	97526.4	97526.4	2.532	FLAG	2.125	2.219	1.714	2.155	1.642	1.894	1.312	1.229	1.561	1.582	2.437	1.742	2.821	1.643	1.761
3077-66_2	SL003324	Coagulation factor Xa	Coagulation Factor Xa	P00742	2159	F10	Human	RFU	Protein	0.005	5346.4	5346.4	0.997	PASS	0.986	1.027	1.094	1.141	0.927	0.961	0.948	0.919	1.025	1.072	1.018	0.987	1.106	1.05	1.063
3078-1_2	SL002640	Placenta growth factor	PlGF	P49763	5228	PGF	Human	RFU	Protein	40	337.7	337.7	1.112	PASS	0.951	0.974	1.133	1.007	0.973	1.031	0.926	0.981	0.94	0.923	0.95	1.246	1.036	0.959	1.042
3079-62_2	SL005152	Retinoic acid receptor responder protein 2	TIG2	Q99969	5919	RARRES2	Human	RFU	Protein	0.005	2452.05	2452.05	0.968	PASS	0.975	0.973	0.954	0.974	1.013	0.958	1.012	0.938	0.989	1.005	0.964	0.986	0.898	0.951	0.969
3081-70_2	SL005227	NKG2D ligand 1	ULBP-1	Q9BZM6	80329	ULBP1	Human	RFU	Protein	40	421.45	421.45	0.838	PASS	0.856	0.947	0.967	0.966	0.927	0.909	0.912	0.889	0.832	0.913	0.948	0.979	0.862	0.922	0.914
3082-9_2	SL005228	NKG2D ligand 2	ULBP-2	Q9BZM5	80328	ULBP2	Human	RFU	Protein	40	328.75	328.75	0.956	PASS	0.977	1.05	1.129	1.115	1.075	0.992	1.102	1.063	1.012	1.076	1.085	1.18	0.993	1.039	1.181
3083-71_1	SL005233	Tumor necrosis factor receptor superfamily member 27	XEDAR	Q9HAV5	60401	EDA2R	Human	RFU	Protein	40	650.85	650.85	1.229	PASS	1.311	1.22	1.15	1.049	0.926	0.887	1.066	0.919	0.867	0.968	1.206	1.057	1.047	1.111	1.208
3091-70_2	SL004771	Aurora kinase A	Aurora kinase A	O14965	6790	AURKA	Human	RFU	Protein	40	1186.75	1186.75	1.07	PASS	0.959	1.119	1.134	1.179	1.009	0.995	1.02	1.016	0.979	1.061	1.145	1.164	1.06	1.112	1.091
3115-64_2	SL006918	Mitogen-activated protein kinase 1	MK01	P28482	5594	MAPK1	Human	RFU	Protein	40	6928.95	6928.95	1.255	PASS	1.14	1.217	1.131	1.205	1.107	1.087	1.236	1.074	1.195	1.189	1.249	1.176	1.187	1.2	1.228
3122-6_2	SL003733	Diablo homolog; mitochondrial	SMAC	Q9NR28	56616	DIABLO	Human	RFU	Protein	40	3677.65	3677.65	0.826	PASS	0.786	0.841	0.67	0.73	0.645	0.638	1.077	0.625	0.748	0.666	0.852	0.608	0.845	0.689	0.799
3132-1_1	SL004486	Vascular endothelial growth factor C	VEGF-C	P49767	7424	VEGFC	Human	RFU	Protein	40	838.5	838.5	1.113	PASS	1.035	1.099	0.969	1.039	0.874	0.931	0.918	0.937	0.943	0.939	1.059	0.982	1.07	1.032	1.005
3143-3_1	SL002524	T-cell surface glycoprotein CD4	sCD4	P01730	920	CD4	Human	RFU	Protein	40	304.55	304.55	0.766	PASS	0.793	0.868	0.876	0.909	0.954	0.887	0.869	0.997	0.888	0.971	0.853	0.898	0.715	0.937	0.843
3151-6_1	SL003305	Interleukin-2 receptor subunit alpha	IL-2 sRa	P01589	3559	IL2RA	Human	RFU	Protein	40	944.85	944.85	1.276	FLAG	1.743	1.086	1.112	1.04	1.052	1.276	1.013	1.095	1.398	1.061	1.051	1.585	1.346	1.09	1.283
3152-57_1	SL001800	Tumor necrosis factor receptor superfamily member 1B	TNF sR-II	P20333	7133	TNFRSF1B	Human	RFU	Protein	1	9075.35	9075.35	1.058	PASS	1.002	1.016	1.074	1.013	1.037	1.045	0.952	1.022	1.078	1.038	1.022	1.136	1.029	1.083	1.089
3166-92_1	SL005215	Myeloid cell surface antigen CD33	Siglec-3	P20138	945	CD33	Human	RFU	Protein	40	3888.1	3888.1	1.056	PASS	1.02	1.06	0.958	0.913	1.059	1.009	1.24	1.048	1.12	1.151	1.067	0.837	0.959	1.103	1.068
3168-8_2	SL004626	A disintegrin and metalloproteinase with thrombospondin motifs 5	ADAMTS-5	Q9UNA0	11096	ADAMTS5	Human	RFU	Protein	40	306.7	306.7	0.628	PASS	0.681	0.733	0.865	0.829	0.904	0.845	0.827	0.921	0.829	0.9	0.754	0.897	0.623	0.838	0.791
3169-70_2	SL010368	Alpha-L-iduronidase	IDUA	P35475	3425	IDUA	Human	RFU	Protein	1	993.05	993.05	0.912	PASS	1.222	0.871	0.914	0.818	0.924	0.93	0.921	0.998	0.945	0.949	0.838	0.902	0.828	0.958	0.981
3170-6_1	SL007261	Methionine aminopeptidase 2	AMPM2	P50579	10988	METAP2	Human	RFU	Protein	40	10679.1	10679.1	1.168	FLAG	1.413	1.188	1.133	1.254	1.142	1.057	1.3	1.185	1.162	1.195	1.225	1.018	1.248	1.179	1.326
3171-57_2	SL004469	Amyloid beta A4 protein	amyloid precursor protein	P05067	351	APP	Human	RFU	Protein	1	22602.2	22602.2	1.032	PASS	0.991	0.922	1.001	0.915	1.036	1.008	0.923	1.027	1.094	1.004	0.91	0.925	0.925	1.018	0.983
3172-28_2	SL008956	Arylsulfatase B	ARSB	P15848	411	ARSB	Human	RFU	Protein	40	1236.1	1236.1	0.885	PASS	0.837	0.943	0.895	0.995	0.946	1.002	0.937	0.947	0.918	0.961	0.958	0.862	0.968	0.88	0.91
3173-49_2	SL008611	N-acylethanolamine-hydrolyzing acid amidase	ASAHL	Q02083	27163	NAAA	Human	RFU	Protein	40	5643.8	5643.8	0.877	PASS	0.774	0.831	0.783	0.818	0.816	0.829	0.875	0.822	0.911	0.867	0.822	0.792	0.885	0.841	0.838
3174-2_1	SL008421	A disintegrin and metalloproteinase with thrombospondin motifs 1	ATS1	Q9UHI8	9510	ADAMTS1	Human	RFU	Protein	40	311	311	0.849	FLAG	1.037	1.043	1.203	1.214	1.48	1.283	1.268	1.353	1.163	1.381	1.095	1.299	0.837	1.19	1.13
3175-51_5	SL006610	A disintegrin and metalloproteinase with thrombospondin motifs 13	ATS13	Q76LX8	11093	ADAMTS13	Human	RFU	Protein	1	3806.15	3806.15	1.264	PASS	1.264	1.284	1.086	1.196	1.249	1.243	1.273	1.203	1.291	1.331	1.386	1.06	1.236	1.295	1.182
3177-49_2	SL010369	Carbonic anhydrase 4	Carbonic Anhydrase IV	P22748	762	CA4	Human	RFU	Protein	40	1852.6	1852.6	0.87	FLAG	1.057	0.816	0.975	0.653	0.664	1.174	0.502	0.67	0.831	0.62	0.662	0.91	1.15	0.585	0.743
3178-5_2	SL007280	Dipeptidyl peptidase 1	CATC	P53634	1075	CTSC	Human	RFU	Protein	40	689.1	689.1	0.751	PASS	0.73	0.862	0.911	0.936	0.894	0.871	0.889	0.94	0.836	0.913	0.877	0.855	0.735	0.9	0.843
3179-51_2	SL009213	Lysosomal protective protein	Cathepsin A	P10619	5476	CTSA	Human	RFU	Protein	1	6038.75	6038.75	1.063	FLAG	1.252	1.07	1.003	1.026	1.039	1.132	1.052	1.056	1.13	1.042	1.029	1.126	1.549	1.016	1.17
3181-50_2	SL004673	Cathepsin S	Cathepsin S	P25774	1520	CTSS	Human	RFU	Protein	1	867.75	867.75	1.184	FLAG	1.429	1.108	1.17	1.098	1.008	1.259	1.105	1.1	1.188	1.008	1.121	1.335	1.556	1.038	1.164
3182-38_2	SL010371	Ectonucleoside triphosphate diphosphohydrolase 1	CD39	P49961	953	ENTPD1	Human	RFU	Protein	40	1426.75	1426.75	0.848	PASS	0.962	0.85	0.894	0.836	0.801	0.905	0.795	0.861	0.831	0.86	0.837	0.988	0.869	0.84	0.834
3184-25_2	SL000358	Coagulation factor VII	Coagulation Factor VII	P08709	2155	F7	Human	RFU	Protein	0.005	591.25	591.25	0.974	PASS	1.09	0.962	0.912	0.909	1.009	1.063	1.136	1.061	1.191	1.062	0.984	0.985	1.213	0.862	0.893
3186-2_2	SL002525	Complement C2	C2	P06681	717	C2	Human	RFU	Protein	0.005	2608.85	2608.85	0.764	PASS	0.821	0.78	0.853	0.867	0.871	0.834	0.888	0.799	0.868	0.84	0.832	0.762	0.747	0.82	0.933
3187-52_2	SL007284	Cysteine-rich secretory protein 3	CRIS3	P54108	10321	CRISP3	Human	RFU	Protein	40	254.2	254.2	0.653	PASS	0.799	0.783	0.924	0.9	1.003	0.949	0.895	0.996	0.866	0.94	0.8	1.074	0.664	0.848	0.866
3189-61_2	SL010372	Enteropeptidase	Enterokinase	P98073	5651	TMPRSS15	Human	RFU	Protein	40	419.8	419.8	0.882	PASS	0.995	0.994	1.189	1.145	1.36	1.284	1.168	1.337	1.216	1.345	1.051	1.252	0.875	1.173	1.138
3191-50_2	SL012783	WAP; kazal; immunoglobulin; kunitz and NTR domain-containing protein 1	WFKN1	Q96NZ8	117166	WFIKKN1	Human	RFU	Protein	40	967.6	967.6	1.449	FLAG	1.434	1.467	1.487	1.47	1.56	1.559	1.663	1.615	1.555	1.712	1.532	1.346	1.341	1.622	1.514
3192-3_2	SL002695	Cytosolic non-specific dipeptidase	Glutamate carboxypeptidase	Q96KP4	55748	CNDP2	Human	RFU	Protein	40	891.6	891.6	0.92	PASS	0.941	0.911	0.984	0.998	1.007	1.091	0.945	1.019	0.96	1.04	0.938	1.069	0.943	0.916	0.856
3194-36_2	SL008759	Platelet glycoprotein VI	GPVI	Q9HCN6	51206	GP6	Human	RFU	Protein	1	5239.5	5239.5	0.756	PASS	0.834	0.698	0.778	0.669	0.795	0.765	0.893	0.762	0.83	0.744	0.664	0.685	0.62	0.747	0.884
3195-50_2	SL000678	Granulysin	Granulysin	P22749	10578	GNLY	Human	RFU	Protein	1	1860.55	1860.55	0.979	PASS	0.936	0.973	0.989	0.925	0.983	0.971	1.054	1.024	1.055	1.085	0.968	0.889	0.93	1.007	1.002
3196-6_2	SL008023	Hyaluronan and proteoglycan link protein 1	HPLN1	P10915	1404	HAPLN1	Human	RFU	Protein	40	1060.45	1060.45	1.079	PASS	1.028	0.933	0.964	0.963	0.983	1.066	0.968	1.058	0.992	1.044	0.964	1.128	0.993	0.981	1.08
3197-70_2	SL007122	Insulin-degrading enzyme	IDE	P14735	3416	IDE	Human	RFU	Protein	40	1633.8	1633.8	1.04	PASS	0.995	0.979	0.938	0.965	0.942	1.004	0.937	0.975	1.088	0.995	0.98	0.897	1.061	0.989	0.997
3198-4_1	SL008639	Iduronate 2-sulfatase	IDS	P22304	3423	IDS	Human	RFU	Protein	40	2913.9	2913.9	1.384	PASS	1.165	0.949	1.149	0.931	0.875	0.996	1.139	1.223	1.301	1.094	0.873	1.113	1.217	1.209	1.267
3199-54_2	SL003916	Kallikrein-12	kallikrein 12	Q9UKR0	43849	KLK12	Human	RFU	Protein	40	5196.35	5196.35	1.533	FLAG	1.252	1.246	1.435	1.093	1.105	1.433	0.945	1.21	1.251	1.081	1.077	1.389	1.282	1.155	1.126
3200-49_2	SL003918	Kallikrein-13	kallikrein 13	Q9UKR3	26085	KLK13	Human	RFU	Protein	40	1046.6	1046.6	0.962	PASS	0.922	1.08	1.015	1.107	1.016	1.029	1.051	1.06	0.972	1.074	1.132	0.999	0.96	1.095	0.957
3201-49_2	SL003863	Kallikrein-5	kallikrein 5	Q9Y337	25818	KLK5	Human	RFU	Protein	40	194.6	194.6	0.679	FLAG	0.756	0.839	0.984	1.011	1.124	1.017	1.012	1.078	0.905	1.087	0.762	1.006	0.564	0.88	0.94
3202-28_2	SL010393	Kremen protein 2	KREM2	Q8NCW0	79412	KREMEN2	Human	RFU	Protein	40	1947.75	1947.75	1.5	FLAG	1.812	1.139	1.308	1.07	1.063	1.622	1.009	1.159	1.535	1.116	1.055	1.617	1.809	1.101	1.621
3204-2_2	SL007100	Leukotriene A-4 hydrolase	LKHA4	P09960	4048	LTA4H	Human	RFU	Protein	40	761.6	761.6	0.749	FLAG	0.715	0.792	0.521	0.714	0.712	0.847	0.234	0.284	0.612	0.666	0.683	0.655	0.819	0.329	0.411
3206-4_2	SL008904	Lymphatic vessel endothelial hyaluronic acid receptor 1	LYVE1	Q9Y5Y7	10894	LYVE1	Human	RFU	Protein	0.005	328.25	328.25	2.459	FLAG	2.708	2.222	1.822	2.1	2.009	2.111	2.688	1.653	2.162	1.843	2.537	1.907	2.603	1.787	2.294
3208-2_4	SL006992	Matrilin-3	MATN3	O15232	4148	MATN3	Human	RFU	Protein	40	477.7	477.7	1.098	PASS	1.159	1.148	1.164	1.094	1.183	1.328	1.07	1.139	1.115	1.068	1.086	1.199	1.147	1.067	1.022
3209-69_1	SL005437	Matrix extracellular phosphoglycoprotein	MEPE	Q9NQ76	56955	MEPE	Human	RFU	Protein	40	240.05	240.05	0.754	PASS	0.821	0.902	0.889	0.917	0.966	0.87	1.048	0.928	0.878	0.929	0.905	0.857	0.703	0.882	0.942
3210-1_2	SL010374	Methionine aminopeptidase 1	METAP1	P53582	23173	METAP1	Human	RFU	Protein	40	570.75	570.75	0.798	PASS	1.02	0.924	0.977	1.105	1.095	0.973	1.215	1.205	1.041	1.144	1.013	0.989	0.922	0.995	0.991
3212-30_3	SL010375	Neutral ceramidase	ASAH2	Q9NR71	56624	ASAH2	Human	RFU	Protein	40	4493.25	4493.25	1.402	FLAG	1.356	1.295	1.233	1.096	1.237	1.323	1.247	1.27	1.365	1.312	1.197	1.122	1.247	1.236	1.317
3213-65_2	SL000640	Nidogen-1	Nidogen	P14543	4811	NID1	Human	RFU	Protein	1	4557.9	4557.9	0.991	PASS	1.002	1.016	0.815	0.989	0.874	0.881	1.197	0.837	0.944	0.924	1.095	0.775	0.982	0.823	0.944
3216-2_2	SL005797	Polymeric immunoglobulin receptor	PIGR	P01833	5284	PIGR	Human	RFU	Protein	1	2817.9	2817.9	1.303	PASS	1.207	1.123	1.156	1.126	1.078	1.133	1.122	1.177	1.395	1.218	1.194	1.034	1.267	1.264	1.346
3217-74_2	SL004457	Glia-derived nexin	Protease nexin I	P07093	5270	SERPINE2	Human	RFU	Protein	40	5449.85	5449.85	1.892	FLAG	2.202	1.573	1.558	1.421	1.501	1.72	1.467	1.473	2.129	1.602	1.545	1.48	1.706	1.49	1.619
3220-40_2	SL010378	Proto-oncogene tyrosine-protein kinase receptor Ret	RET	P07949	5979	RET	Human	RFU	Protein	1	2174.95	2174.95	1.191	FLAG	1.346	0.904	1.003	0.802	0.973	1.011	0.976	1.024	1.081	0.982	0.848	0.997	1.263	0.959	1.428
3221-54_1	SL003770	Secreted frizzled-related protein 1	SARP-2	Q8N474	6422	SFRP1	Human	RFU	Protein	40	4509.35	4509.35	1.139	PASS	1.081	1.129	0.995	1.016	0.972	1.011	0.959	1.03	1.11	1.128	1.115	0.987	1.054	1.202	1.156
3222-11_2	SL010379	Semaphorin-3A	Semaphorin 3A	Q14563	10371	SEMA3A	Human	RFU	Protein	40	1415.9	1415.9	1.181	FLAG	1.433	1.228	1.3	1.28	1.286	1.344	1.331	1.28	1.348	1.34	1.29	1.655	1.329	1.257	1.463
3232-28_2	SL004118	Tartrate-resistant acid phosphatase type 5	TrATPase	P13686	54	ACP5	Human	RFU	Protein	1	6398.45	6398.45	1.172	PASS	1.198	1.006	1.137	1.017	1.148	1.229	1.029	1.112	1.297	1.082	1.014	1.12	1.11	1.041	1.238
3234-23_2	SL010390	Coiled-coil domain-containing protein 80	URB	Q76M96	151887	CCDC80	Human	RFU	Protein	1	1694.05	1694.05	0.957	PASS	0.927	0.948	0.959	0.922	0.992	0.997	0.99	1.021	0.998	1.072	0.95	0.879	0.89	1.034	0.946
3235-50_2	SL010391	WAP; Kazal; immunoglobulin; Kunitz and NTR domain-containing protein 2	WFKN2	Q8TEU8	124857	WFIKKN2	Human	RFU	Protein	40	8407.8	8407.8	1.136	PASS	1.117	1.065	1.116	1.063	1.136	1.163	1.147	1.152	1.189	1.221	1.109	1.085	1.114	1.145	1.225
3280-49_2	SL004661	Aggrecan core protein	Aggrecan	P16112	176	ACAN	Human	RFU	Protein	40	398.25	398.25	0.562	FLAG	0.552	0.565	0.531	0.537	0.587	0.621	0.673	0.581	0.612	0.581	0.548	0.487	0.618	0.476	0.544
3281-19_1	SL006803	Angiopoietin-related protein 3	ANGL3	Q9Y5C1	27329	ANGPTL3	Human	RFU	Protein	40	389.4	389.4	0.692	PASS	0.744	0.888	0.986	0.977	1.014	0.951	0.956	1.023	0.891	1.012	0.863	1.008	0.673	0.951	0.876
3283-21_1	SL006544	Transforming growth factor-beta-induced protein ig-h3	BGH3	Q15582	7045	TGFBI	Human	RFU	Protein	1	32099.2	32099.2	1.115	PASS	1.137	1.207	1.046	1.226	1.037	0.967	1.041	0.92	1.077	0.929	1.209	1.039	1.253	1.076	1.178
3284-75_1	SL007804	Biglycan	BGN	P21810	633	BGN	Human	RFU	Protein	40	1560.15	1560.15	0.666	FLAG	0.63	0.649	0.549	0.575	0.461	0.54	0.491	0.533	0.651	0.472	0.568	0.804	0.976	0.508	0.64
3285-23_2	SL000310	Complement C1r subcomponent	C1r	P00736	715	C1R	Human	RFU	Protein	0.005	3213.65	3213.65	1.375	PASS	1.263	1.188	1.19	1.216	1.227	1.251	1.196	1.285	1.319	1.354	1.237	1.151	1.265	1.31	1.272
3289-19_2	SL010449	Carbonic anhydrase-related protein 10	Carbonic Anhydrase X	Q9NS85	56934	CA10	Human	RFU	Protein	40	622.2	622.2	1.311	PASS	1.239	1.118	1.154	1.127	1.189	1.254	1.074	1.208	1.251	1.153	1.105	1.279	1.142	1.121	1.255
3290-50_2	SL008773	CD109 antigen	CD109	Q6YHK3	135228	CD109	Human	RFU	Protein	40	3553.9	3553.9	0.685	FLAG	0.847	0.631	0.628	0.618	0.602	0.689	0.647	0.662	0.718	0.633	0.623	0.633	0.783	0.549	0.627
3291-30_2	SL002706	Low affinity immunoglobulin epsilon Fc receptor	CD23	P06734	2208	FCER2	Human	RFU	Protein	1	4001.75	4001.75	1.048	PASS	1.047	0.968	1.105	0.924	1.018	0.997	0.978	1.047	1.037	0.999	0.937	1.048	0.956	1.025	1.177
3292-75_1	SL010450	CD48 antigen	CD48	P09326	962	CD48	Human	RFU	Protein	1	568.4	568.4	1.478	FLAG	1.881	1.326	1.269	1.205	1.063	1.204	1.186	1.129	1.433	1.181	1.354	1.252	1.401	1.276	1.389
3293-2_4	SL006108	CD5 antigen-like	CD5L	O43866	922	CD5L	Human	RFU	Protein	0.005	2351.7	2351.7	0.875	PASS	0.786	0.902	0.727	0.773	0.733	0.714	0.859	0.637	0.835	0.729	0.924	0.655	0.908	0.685	0.817
3294-55_2	SL010451	Cryptic protein	CFC1	P0CG37	55997	CFC1	Human	RFU	Protein	40	1551.35	1551.35	0.92	PASS	0.964	0.926	0.916	0.96	0.993	0.999	1.05	0.98	1.013	1.069	1.036	0.853	0.955	0.947	0.92
3296-92_2	SL008623	Contactin-2	CNTN2	Q02246	6900	CNTN2	Human	RFU	Protein	40	951.9	951.9	0.716	PASS	0.753	0.787	0.71	0.788	0.791	0.815	0.846	0.765	0.792	0.819	0.831	0.697	0.836	0.681	0.761
3298-52_2	SL010454	Contactin-4	Contactin-4	Q8IWV2	152330	CNTN4	Human	RFU	Protein	1	4011.15	4011.15	1.283	PASS	1.151	1.108	1.041	1.02	1.049	1.157	1.04	0.984	1.205	1.054	1.137	0.978	1.236	1.032	1.072
3299-29_2	SL010455	Contactin-5	Contactin-5	O94779	53942	CNTN5	Human	RFU	Protein	40	567.45	567.45	0.863	PASS	0.931	0.986	0.997	0.963	1.11	1.196	1.08	1.102	1.014	1.119	0.974	1.084	0.883	0.967	0.927
3302-58_1	SL007049	Cystatin-F	CYTF	O76096	8530	CST7	Human	RFU	Protein	40	965.5	965.5	1.15	PASS	1.099	1.013	0.808	0.869	0.765	0.836	0.897	0.703	0.787	0.74	0.956	0.961	1.043	0.818	1.129
3303-23_2	SL004438	Cystatin-M	Cystatin M	Q15828	1474	CST6	Human	RFU	Protein	1	8112.75	8112.75	0.855	PASS	0.878	0.835	0.857	0.789	0.8	0.792	0.977	0.772	0.801	0.778	0.8	0.734	0.718	0.817	0.874
3305-6_1	SL010457	Delta-like protein 4	DLL4	Q9NR61	54567	DLL4	Human	RFU	Protein	40	410.05	410.05	0.762	PASS	0.874	0.793	0.758	0.768	0.714	0.715	0.723	0.731	0.709	0.721	0.765	0.76	0.782	0.74	0.819
3309-2_2	SL010459	Low affinity immunoglobulin gamma Fc region receptor II-a	FCG2A	P12318	2212	FCGR2A	Human	RFU	Protein	1	2071.9	2071.9	0.794	PASS	0.794	0.892	0.771	0.866	0.955	0.85	1.296	0.905	1.01	0.954	0.838	0.689	0.7	0.817	0.823
3310-62_1	SL010460	Low affinity immunoglobulin gamma Fc region receptor II-b	FCG2B	P31994	2213	FCGR2B	Human	RFU	Protein	1	2045.4	2045.4	1.241	FLAG	1.42	1.093	1.078	0.939	0.939	1.283	1.264	0.941	1.318	0.906	1.047	1.073	1.387	0.992	1.342
3311-27_1	SL008609	Low affinity immunoglobulin gamma Fc region receptor III-B	FCG3B	O75015	2215	FCGR3B	Human	RFU	Protein	0.005	1343.3	1343.3	1.113	FLAG	1.582	0.977	1.029	0.906	0.986	1.033	1.084	0.974	1.035	1.001	1.005	1.164	1.059	0.963	0.934
3312-64_1	SL010461	High affinity immunoglobulin gamma Fc receptor I	FCGR1	P12314	2209	FCGR1A	Human	RFU	Protein	40	541.45	541.45	1.224	PASS	1.121	1.202	1.122	1.211	1.255	1.286	1.168	1.181	1.265	1.293	1.246	1.382	1.297	1.244	1.186
3313-21_2	SL006542	Ficolin-2	FCN2	Q15485	2220	FCN2	Human	RFU	Protein	1	1317.6	1317.6	1.659	FLAG	1.826	1.607	1.506	1.454	1.407	1.554	1.5	1.407	1.821	1.422	1.734	1.507	2.502	1.445	1.529
3314-74_2	SL004858	GDNF family receptor alpha-1	GFRa-1	P56159	2674	GFRA1	Human	RFU	Protein	40	887.7	887.7	0.99	PASS	0.874	0.983	0.964	0.976	0.983	1.011	0.998	1.049	1.001	1.105	0.988	0.928	0.98	1.057	0.981
3315-15_1	SL010463	Glypican-2	GPC2	Q8N158	221914	GPC2	Human	RFU	Protein	40	168.9	168.9	0.839	PASS	0.956	0.909	1.027	0.977	1.074	1.023	0.998	1.019	0.947	1.021	0.877	1.158	0.753	0.935	1.062
3316-58_1	SL004466	Heparin cofactor 2	Heparin cofactor II	P05546	3053	SERPIND1	Human	RFU	Protein	0.005	3335.2	3335.2	1.774	FLAG	1.713	1.319	1.125	1.213	1.118	1.215	1.098	1.043	1.241	1.226	1.363	1.523	1.656	1.214	1.195
3317-33_1	SL004860	Serine protease HTRA2; mitochondrial	HTRA2	O43464	27429	HTRA2	Human	RFU	Protein	40	3324.3	3324.3	0.871	PASS	0.85	0.824	0.759	0.772	0.649	0.661	0.704	0.672	0.734	0.682	0.798	0.708	0.922	0.753	0.784
3320-49_2	SL005087	Insulin-like growth factor-binding protein 7	IGFBP-7	Q16270	3490	IGFBP7	Human	RFU	Protein	1	43282.7	43282.7	1.111	PASS	1.041	1.052	1.129	1.021	1.117	1.169	1.015	1.116	1.229	1.081	1.007	1.074	1.07	1.028	1.161
3321-2_2	SL007385	Interleukin-24	IL24	Q13007	11009	IL24	Human	RFU	Protein	40	183.45	183.45	0.772	PASS	0.915	0.802	0.965	0.877	1.056	1.092	0.947	1.084	0.954	1.028	0.798	0.969	0.698	0.843	0.979
3322-52_2	SL010464	Leucine-rich repeats and immunoglobulin-like domains protein 3	LRIG3	Q6UXM1	121227	LRIG3	Human	RFU	Protein	40	6276.65	6276.65	1.03	PASS	1.039	1.04	0.955	0.979	1.093	1.17	1.098	1.126	1.112	1.205	1.03	0.946	1.06	1.08	1.009
3323-37_1	SL004610	Low-density lipoprotein receptor-related protein 8	LRP8	Q14114	7804	LRP8	Human	RFU	Protein	40	2156.4	2156.4	0.952	PASS	0.979	1.064	0.813	0.977	0.833	0.835	0.971	0.801	0.862	0.898	0.991	0.804	1.036	0.914	0.879
3324-51_1	SL007674	T-lymphocyte surface antigen Ly-9	LY9	Q9HBG7	4063	LY9	Human	RFU	Protein	40	2300.25	2300.25	0.592	FLAG	0.799	0.601	0.499	0.546	0.488	0.583	0.552	0.499	0.533	0.527	0.57	0.584	0.728	0.534	0.617
3325-2_2	SL010465	Matrilin-2	MATN2	O00339	4147	MATN2	Human	RFU	Protein	1	8761.45	8761.45	1.258	FLAG	1.551	0.976	1.026	0.934	1.037	1.105	0.986	1.113	1.539	1.057	0.943	1.281	1.185	1.023	1.134
3326-58_2	SL004805	Cell adhesion molecule 1	Nectin-like protein 2	Q9BY67	23705	CADM1	Human	RFU	Protein	40	1962.05	1962.05	0.553	FLAG	0.737	0.549	0.677	0.487	0.509	0.689	0.569	0.551	0.584	0.518	0.5	0.575	0.595	0.479	0.718
3327-27_1	SL007673	Netrin-4	NET4	Q9HB63	59277	NTN4	Human	RFU	Protein	1	724	724	1.232	FLAG	1.511	1.237	1.078	1.172	1.026	1.048	1.055	1.034	1.065	1.056	1.229	1.013	1.326	1.186	1.166
3329-14_2	SL004515	Peptidoglycan recognition protein 1	PGRP-S	O75594	8993	PGLYRP1	Human	RFU	Protein	1	678.05	678.05	0.731	PASS	0.765	0.779	0.628	0.686	0.711	0.677	0.86	0.637	0.787	0.676	0.787	0.62	0.767	0.634	0.791
3331-8_1	SL010468	RGM domain family member B	RGMB	Q6NW40	285704	RGMB	Human	RFU	Protein	1	2125.3	2125.3	0.939	PASS	0.964	0.94	0.902	0.909	0.868	0.868	0.916	0.852	0.901	0.896	0.913	0.832	0.95	0.95	0.928
3332-57_1	SL010469	Hemojuvelin	RGM-C	Q6ZVN8	148738	HFE2	Human	RFU	Protein	1	1085.65	1085.65	0.91	PASS	0.953	0.908	0.901	0.854	0.913	0.922	0.938	0.93	0.925	0.946	0.928	1.128	0.899	0.979	0.977
3336-50_1	SL001998	Tissue factor pathway inhibitor	TFPI	P10646	7035	TFPI	Human	RFU	Protein	1	49873.7	49873.7	1.313	PASS	1.179	1.3	1.303	1.315	1.201	1.301	1.161	1.263	1.278	1.289	1.303	1.22	1.313	1.367	1.276
3339-33_1	SL007206	Thrombospondin-2	TSP2	P35442	7058	THBS2	Human	RFU	Protein	40	13166.6	13166.6	1.101	PASS	0.942	1.083	0.969	1.115	0.981	0.964	1.08	0.961	1.09	1.087	1.134	0.923	1.083	1.066	0.999
3340-53_1	SL007207	Thrombospondin-4	TSP4	P35443	7060	THBS4	Human	RFU	Protein	0.005	386.3	386.3	1.28	PASS	1.125	1.171	1.193	1.17	1.009	1.057	1.093	1.044	1.108	1.111	1.214	1.033	1.088	1.182	1.215
3341-33_4	SL006892	Tyrosine-protein kinase ABL1	ABL1	P00519	25	ABL1	Human	RFU	Protein	40	147.35	147.35	0.403	FLAG	0.526	0.532	0.642	0.657	0.877	0.728	0.748	0.812	0.719	0.773	0.534	0.753	0.405	0.62	0.634
3343-1_4	SL005574	Aminoacylase-1	Aminoacylase-1	Q03154	95	ACY1	Human	RFU	Protein	1	4531.45	4531.45	1.411	FLAG	1.612	1.095	1.167	1.089	1.09	1.778	1.224	1.186	1.453	1.179	1.268	1.316	1.308	1.156	1.424
3344-60_4	SL000272	Antithrombin-III	Antithrombin III	P01008	462	SERPINC1	Human	RFU	Protein	0.005	124008	124008	1.254	PASS	1.109	1.129	1.134	1.193	1.096	1.146	1.089	1.046	1.085	1.041	1.164	1.014	1.193	1.223	1.059
3346-72_2	SL010520	Aurora kinase B	AURKB	Q96GD4	9212	AURKB	Human	RFU	Protein	40	858.7	858.7	1.062	FLAG	1.081	1.133	1.194	1.14	1.181	1.558	1.085	1.319	1.218	1.184	1.065	1.609	1.249	1.12	1.347
3347-9_2	SL002792	beta-adrenergic receptor kinase 1	BARK1	P25098	156	ADRBK1	Human	RFU	Protein	40	2703.75	2703.75	0.841	PASS	0.9	0.832	0.792	0.814	0.908	0.941	0.889	1.01	0.937	0.984	0.81	0.952	0.883	0.842	0.904
3348-49_2	SL003994	Bone morphogenetic protein 1	BMP-1	P13497	649	BMP1	Human	RFU	Protein	1	3521.95	3521.95	0.939	PASS	0.924	0.964	1.032	1.029	1.021	1	1.022	1.047	1.119	1.052	0.991	0.96	0.916	1.043	1.184
3350-53_2	SL010491	Calcium/calmodulin-dependent protein kinase type II subunit alpha	CAMK2A	Q9UQM7	815	CAMK2A	Human	RFU	Protein	40	482.7	482.7	0.725	PASS	0.921	0.791	0.848	0.876	0.931	0.945	0.855	0.933	0.893	0.922	0.818	0.914	0.741	0.838	0.853
3351-1_1	SL010492	Calcium/calmodulin-dependent protein kinase type II subunit beta	CAMK2B	Q13554	816	CAMK2B	Human	RFU	Protein	40	1084.95	1084.95	0.906	PASS	0.944	0.903	0.939	0.954	1.001	0.981	0.979	1.035	1.011	1.035	0.914	0.908	0.816	0.975	0.97
3352-80_3	SL010288	Carbonic anhydrase 6	Carbonic anhydrase 6	P23280	765	CA6	Human	RFU	Protein	1	8258.65	8258.65	1.34	FLAG	1.359	1.508	1.014	1.477	1.214	1.237	1.275	0.847	0.939	1.26	1.769	1.208	1.651	0.987	0.96
3356-50_1	SL004868	Carbonic anhydrase 7	Carbonic anhydrase VII	P43166	766	CA7	Human	RFU	Protein	40	368.95	368.95	0.981	PASS	1.083	1.166	1.27	1.189	1.358	1.324	1.326	1.368	1.24	1.349	1.128	1.395	1.03	1.254	1.313
3357-67_2	SL010495	Cyclin-dependent kinase 2:Cyclin-A2 complex	CDK2/cyclin A	P24941 P20248	1017 890	CDK2 CCNA2	Human	RFU	Protein	40	304.9	304.9	0.682	PASS	0.729	0.775	0.93	0.908	1.029	0.949	0.926	0.994	0.9	1.006	0.806	0.984	0.69	0.853	0.86
3358-51_2	SL010496	Cyclin-dependent kinase 5:Cyclin-dependent kinase 5 activator 1 complex	CDK5/p35	Q00535 Q15078	1020 8851	CDK5 CDK5R1	Human	RFU	Protein	40	1162.9	1162.9	1.123	FLAG	1.394	1.224	1.282	1.202	1.084	1.316	0.967	1.368	1.187	1.129	1.138	1.398	1.505	1.107	1.1
3359-11_2	SL010522	Cyclin-dependent kinase 8:Cyclin-C complex	CDK8/cyclin C	P49336 P24863	1024 892	CDK8 CCNC	Human	RFU	Protein	40	963.3	963.3	0.982	PASS	1.155	0.929	1.005	0.935	0.928	1.287	0.824	0.976	1.158	0.905	0.871	1.152	1.137	0.876	1.098
3360-50_4	SL003726	Serine/threonine-protein kinase Chk2	Chk2	O96017	11200	CHEK2	Human	RFU	Protein	40	283.4	283.4	0.78	PASS	0.916	0.838	0.896	0.875	0.957	0.928	0.961	0.911	0.898	0.916	0.853	0.87	0.765	0.836	0.921
3361-26_2	SL010610	C-type lectin domain family 4 member K	CLC4K	Q9UJ71	50489	CD207	Human	RFU	Protein	40	177.95	177.95	0.64	FLAG	0.919	0.708	1.054	0.834	1.013	0.928	0.867	1.023	0.866	0.868	0.703	1.049	0.559	0.744	0.884
3362-61_2	SL009400	Chordin-like protein 1	CRDL1	Q9BU40	91851	CHRDL1	Human	RFU	Protein	1	2215	2215	1.425	FLAG	1.502	1.024	0.9	0.971	0.914	0.863	1.028	0.794	1.016	0.804	1.027	1.123	1.101	0.804	0.986
3363-31_4	SL004781	Tyrosine-protein kinase CSK	CSK	P41240	1445	CSK	Human	RFU	Protein	1	2813.75	2813.75	0.965	PASS	1.024	0.978	1.002	1.032	1.075	1.019	1.033	1.145	1.122	1.174	1.001	0.893	0.908	1.097	0.99
3364-76_2	SL006910	Cathepsin L2	Cathepsin V	O60911	1515	CTSV	Human	RFU	Protein	40	1870.85	1870.85	1.076	PASS	1.1	1.006	0.914	1.028	0.993	0.987	1.047	0.971	0.974	1.091	1.084	1	1.129	0.957	0.93
3365-7_2	SL010612	Dickkopf-related protein 4	Dkk-4	Q9UBT3	27121	DKK4	Human	RFU	Protein	40	5230.05	5230.05	0.786	PASS	0.816	0.819	0.838	0.837	0.828	0.85	0.846	0.859	0.908	0.869	0.818	0.919	0.794	0.828	0.885
3366-51_2	SL006550	Extracellular matrix protein 1	ECM1	Q16610	1893	ECM1	Human	RFU	Protein	0.005	21085.7	21085.7	1.158	PASS	1.185	1.019	1.104	1.022	1.045	1.02	0.964	1.09	1.157	1.024	0.999	1.138	1.092	1.056	1.073
3367-8_3	SL006777	Fetuin-B	FETUB	Q9UGM5	26998	FETUB	Human	RFU	Protein	0.005	7457.5	7457.5	1.393	FLAG	1.229	1.273	1.142	1.286	1.24	1.256	1.157	1.161	1.292	1.317	1.403	1.154	1.4	1.223	1.139
3373-5_2	SL004654	Granzyme H	Granzyme H	P20718	2999	GZMH	Human	RFU	Protein	40	234.6	234.6	0.714	PASS	0.859	0.828	1.016	0.937	1.135	1.145	0.978	1.192	0.951	1.024	0.824	1.198	0.79	0.903	0.922
3374-49_2	SL010499	Tyrosine-protein kinase HCK	HCK	P08631	3055	HCK	Human	RFU	Protein	40	199.4	199.4	0.55	FLAG	0.646	0.671	0.846	0.794	0.896	0.841	0.798	0.869	0.757	0.831	0.683	1.101	0.592	0.748	0.779
3376-49_2	SL010613	Interleukin-17 receptor D	IL-17 RD	Q8NFM7	54756	IL17RD	Human	RFU	Protein	40	486.55	486.55	1.478	FLAG	1.784	1.178	1.305	1.159	1.256	1.283	1.171	1.161	1.358	1.155	1.14	1.585	1.423	1.064	1.395
3378-49_2	SL000064	Kallikrein-7	Kallikrein 7	P49862	5650	KLK7	Human	RFU	Protein	1	2000.05	2000.05	0.944	PASS	0.969	0.992	0.95	0.998	0.966	1.06	1.078	1.021	1.108	1.072	0.97	0.903	0.899	1.069	1.103
3379-29_1	SL007228	Protein kinase C iota type	KPCI	P41743	5584	PRKCI	Human	RFU	Protein	40	1645.6	1645.6	1.161	PASS	1.175	1.172	1.12	1.159	1.079	1.113	1.121	1.155	1.184	1.237	1.181	1.124	1.106	1.236	1.215
3381-24_2	SL010500	Tyrosine-protein kinase Lyn; isoform B	LYNB	P07948	4067	LYN	Human	RFU	Protein	40	19087	19087	0.933	PASS	0.92	0.867	0.873	0.903	0.821	0.847	0.799	0.928	0.92	0.941	0.851	0.778	0.857	0.921	0.835
3387-1_2	SL010508	Serine/threonine-protein kinase PAK 3	PAK3	O75914	5063	PAK3	Human	RFU	Protein	40	1002.85	1002.85	1.167	FLAG	1.321	1.337	1.555	1.461	1.391	1.553	1.263	1.472	1.35	1.412	1.282	1.506	1.299	1.366	1.276
3388-58_2	SL010510	Serine/threonine-protein kinase PAK 7	PAK7	Q9P286	57144	PAK7	Human	RFU	Protein	40	499.4	499.4	0.802	PASS	0.828	0.902	0.926	0.964	1.016	1.114	0.959	1.034	0.952	1.067	0.921	0.914	0.772	0.932	0.895
3389-7_2	SL000550	Plasma serine protease inhibitor	PCI	P05154	5104	SERPINA5	Human	RFU	Protein	0.005	99248.6	99248.6	1.367	FLAG	1.158	1.341	1.121	1.328	1.189	1.216	1.228	1.078	1.236	1.128	1.459	1.187	1.553	1.103	1.197
3390-72_2	SL010512	PIK3CA/PIK3R1	PIK3CA/PIK3R1	P42336 P27986	5290 5295	PIK3CA PIK3R1	Human	RFU	Protein	40	455.15	455.15	0.734	PASS	0.833	0.799	0.85	0.841	0.906	0.958	0.866	0.943	0.846	0.905	0.787	0.867	0.699	0.827	0.909
3391-10_2	SL007250	Phosphatidylinositol 4;5-bisphosphate 3-kinase catalytic subunit gamma isoform	PK3CG	P48736	5294	PIK3CG	Human	RFU	Protein	40	1811.5	1811.5	1.136	PASS	1.216	1.211	1.144	1.203	1.095	1.262	1.031	1.143	1.13	1.136	1.171	1.183	1.304	1.085	1.024
3392-68_2	SL017614	RAC-alpha/beta/gamma serine/threonine-protein kinase	PKB a/b/g	P31749 P31751 Q9Y243	207 208 10000	AKT1 AKT2 AKT3	Human	RFU	Protein	1	2621.55	2621.55	0.99	PASS	0.935	0.963	0.866	0.928	0.966	1.049	0.917	1.072	1.066	1.022	0.939	0.978	1.089	0.869	0.98
3394-81_2	SL005258	Serine/threonine-protein kinase PLK1	PLK-1	P53350	5347	PLK1	Human	RFU	Protein	40	206	206	0.493	FLAG	0.592	0.66	0.761	0.782	0.954	0.836	0.862	0.891	0.783	0.883	0.66	0.812	0.505	0.735	0.741
3396-54_2	SL000565	Renin	Renin	P00797	5972	REN	Human	RFU	Protein	1	685.9	685.9	0.953	PASS	1.178	0.916	0.972	0.861	0.887	0.93	0.943	0.94	1.001	0.911	0.866	0.912	0.884	0.942	0.969
3397-7_4	SL010616	Tyrosine-protein phosphatase non-receptor type 11	SHP-2	Q06124	5781	PTPN11	Human	RFU	Protein	40	4035.65	4035.65	0.925	FLAG	1.009	0.79	0.78	0.596	0.814	0.852	0.624	0.9	0.905	0.719	0.699	1.014	0.918	0.704	0.738
3399-31_2	SL007560	Stabilin-2	STAB2	Q8WWQ8	55576	STAB2	Human	RFU	Protein	40	692.15	692.15	0.915	PASS	0.989	0.924	1.078	0.961	0.98	1.114	0.853	1.109	1.056	0.983	0.852	1.194	0.902	0.867	1.007
3400-49_2	SL007747	Serine/threonine-protein kinase TBK1	TBK1	Q9UHD2	29110	TBK1	Human	RFU	Protein	40	215.6	215.6	0.57	FLAG	0.715	0.734	0.897	0.907	1.068	0.972	0.959	1.024	0.883	1.011	0.768	0.966	0.574	0.839	0.8
3401-8_2	SL005261	Tyrosine-protein phosphatase non-receptor type 2	TCPTP	P17706	5771	PTPN2	Human	RFU	Protein	40	296.25	296.25	0.66	PASS	0.792	0.725	0.953	0.84	0.978	0.962	0.865	0.983	0.851	0.939	0.714	1.177	0.733	0.772	0.826
3403-1_2	SL010617	Tryptase beta-2	TPSB2	P20231	64499	TPSB2	Human	RFU	Protein	1	2792	2792	1.315	PASS	1.327	1.184	1.237	1.16	1.058	1.084	1.062	1.048	1.157	1.098	1.14	1.16	1.219	1.143	1.262
3404-51_2	SL010619	Tryptase gamma	TPSG1	Q9NRR2	25823	TPSG1	Human	RFU	Protein	40	214.35	214.35	0.697	PASS	0.745	0.797	0.881	0.87	0.963	0.879	0.914	0.934	0.815	0.916	0.807	0.86	0.716	0.817	0.799
3405-6_2	SL010529	Ubiquitin-fold modifier-conjugating enzyme 1	UFC1	Q9Y3C8	51506	UFC1	Human	RFU	Protein	40	9256.65	9256.65	0.656	FLAG	0.768	0.587	0.603	0.519	0.558	0.569	0.593	0.604	0.631	0.563	0.563	0.564	0.578	0.561	0.603
3412-7_1	SL000104	Apoptosis regulator Bcl-2	Bcl-2	P10415	596	BCL2	Human	RFU	Protein	40	842.15	842.15	1.263	FLAG	1.475	1.299	1.305	1.258	1.188	1.217	1.178	1.263	1.166	1.271	1.28	1.222	1.207	1.277	1.169
3413-50_2	SL003703	Bcl-2-related protein A1	BFL1	Q16548	597	BCL2A1	Human	RFU	Protein	1	704	704	1.249	PASS	1.083	1.288	1.089	1.293	1.104	1.052	1.197	1.092	1.09	1.114	1.381	1.076	1.221	1.242	1.02
3414-40_2	SL006374	Cytoplasmic tyrosine-protein kinase BMX	BMX	P51813	660	BMX	Human	RFU	Protein	40	382.7	382.7	0.806	PASS	0.889	0.965	1.014	1.03	1.175	1.085	1.068	1.115	0.973	1.163	0.997	1.027	0.818	1.044	0.942
3415-61_2	SL004660	Bone sialoprotein 2	BSP	P21815	3381	IBSP	Human	RFU	Protein	40	4011.3	4011.3	0.932	PASS	0.898	0.895	0.823	0.848	0.739	0.793	0.961	0.696	0.858	0.75	0.902	0.807	1.003	0.75	0.922
3416-2_2	SL010521	Tyrosine-protein kinase BTK	BTK	Q06187	695	BTK	Human	RFU	Protein	1	3327.65	3327.65	1.097	PASS	1.172	1	1.119	1.006	1.081	1.085	0.931	1.129	1.181	1.077	0.976	1.008	1.05	1.066	1.063
3418-12_2	SL010490	Calcium/calmodulin-dependent protein kinase type 1D	CAMK1D	Q8IU85	57118	CAMK1D	Human	RFU	Protein	40	2159	2159	1.147	PASS	1.048	1.193	1.236	1.255	1.142	1.251	1.12	1.162	1.128	1.208	1.252	1.186	1.152	1.211	1.077
3419-49_2	SL010493	Calcium/calmodulin-dependent protein kinase type II subunit delta	CAMK2D	Q13557	817	CAMK2D	Human	RFU	Protein	40	3158.5	3158.5	1.007	FLAG	1.646	1.03	0.888	0.938	1.03	1.011	0.942	1.061	1.181	1.035	0.942	1.097	0.969	0.928	0.999
3420-21_2	SL004869	Carbonic anhydrase 13	Carbonic anhydrase XIII	Q8N1Q1	377677	CA13	Human	RFU	Protein	40	913.75	913.75	0.342	FLAG	0.309	0.434	0.31	0.397	0.369	0.376	0.437	0.369	0.334	0.379	0.416	0.316	0.404	0.334	0.288
3421-54_2	SL004635	Tumor necrosis factor ligand superfamily member 8	CD30 Ligand	P32971	944	TNFSF8	Human	RFU	Protein	40	2122.15	2122.15	0.893	PASS	0.917	0.907	0.871	0.849	0.933	0.96	0.91	0.939	0.915	0.965	0.87	0.818	0.874	0.889	0.891
3422-4_2	SL010494	Cyclin-dependent kinase 1:G2/mitotic-specific cyclin-B1 complex	CDK1/cyclin B	P06493 P14635	983 891	CDC2 CCNB1	Human	RFU	Protein	40	479.4	479.4	1.113	FLAG	1.496	1.37	1.699	1.595	1.923	1.704	1.633	1.906	1.529	1.728	1.381	1.835	1.031	1.469	1.439
3423-59_2	SL005250	Chymase	Chymase	P23946	1215	CMA1	Human	RFU	Protein	40	383.6	383.6	0.616	PASS	0.661	0.748	0.799	0.86	0.884	0.875	0.855	0.924	0.806	0.94	0.779	0.843	0.612	0.808	0.711
3427-63_2	SL007324	Casein kinase II subunit alpha	CSK21	P68400	1457	CSNK2A1	Human	RFU	Protein	40	361.05	361.05	0.684	PASS	0.826	0.821	0.922	0.897	0.961	0.89	0.892	0.987	0.814	0.939	0.811	0.928	0.696	0.856	0.816
3431-54_2	SL004137	Ephrin type-A receptor 1	EphA1	P21709	2041	EPHA1	Human	RFU	Protein	40	5644.75	5644.75	0.554	FLAG	0.527	0.55	0.463	0.482	0.428	0.491	0.548	0.436	0.455	0.438	0.521	0.463	0.673	0.408	0.422
3432-21_2	SL010498	Ephrin type-A receptor 3	EPHA3	P29320	2042	EPHA3	Human	RFU	Protein	40	150.3	150.3	0.728	PASS	0.778	0.974	1.077	1.049	1.207	1.042	1.197	1.182	0.976	1.176	0.959	1.03	0.692	1.077	1.005
3434-34_1	SL010349	Fibronectin Fragment 3	FN1.3	P02751	2335	FN1	Human	RFU	Protein	0.005	3970.15	3970.15	1.131	PASS	1.055	0.99	0.925	1.021	0.864	0.965	0.806	0.817	1.018	0.893	1.185	0.988	1.265	0.92	1.001
3435-53_2	SL010348	Fibronectin Fragment 4	FN1.4	P02751	2335	FN1	Human	RFU	Protein	1	77476	77476	0.78	PASS	0.751	0.797	0.731	0.787	0.628	0.709	0.672	0.636	0.65	0.636	0.851	0.619	0.768	0.766	0.665
3437-80_3	SL004636	Receptor-type tyrosine-protein kinase FLT3	Flt-3	P36888	2322	FLT3	Human	RFU	Protein	40	1737	1737	1.39	FLAG	1.714	1.207	1.191	1.081	1.167	1.568	0.983	1.098	1.279	0.949	1.078	1.272	1.47	0.964	1.276
3438-10_2	SL009324	Follistatin-related protein 3	FSTL3	O95633	10272	FSTL3	Human	RFU	Protein	1	5651.35	5651.35	0.903	PASS	0.94	0.861	0.933	0.846	0.954	0.987	0.938	0.907	0.923	0.939	0.844	0.898	0.811	0.884	0.907
3440-7_2	SL004298	Granzyme A	granzyme A	P12544	3001	GZMA	Human	RFU	Protein	40	2836.65	2836.65	0.925	PASS	0.863	0.925	0.889	0.916	0.915	0.939	0.87	0.874	0.936	0.911	0.918	0.894	0.921	0.901	0.902
3441-64_2	SL017188	Glycogen synthase kinase-3 alpha/beta	GSK-3 alpha/beta	P49840 P49841	2931 2932	GSK3A GSK3B	Human	RFU	Protein	40	4726.95	4726.95	1.084	PASS	1.014	1.035	0.906	0.98	0.956	0.978	0.965	0.931	1.057	0.978	1.009	0.881	1.128	0.931	0.934
3443-61_2	SL010523	Homeodomain-interacting protein kinase 3	HIPK3	Q9H422	10114	HIPK3	Human	RFU	Protein	40	803.25	803.25	1.04	PASS	0.982	1.128	1.041	1.118	1.059	1.047	1.072	1.028	1.04	1.077	1.127	1.027	1.005	1.087	1
3445-53_2	SL004151	Interleukin-15 receptor subunit alpha	IL-15 Ra	Q13261	3601	IL15RA	Human	RFU	Protein	40	712.1	712.1	0.935	PASS	1.204	0.939	0.949	0.912	1.014	1.073	1.005	0.98	1.026	0.983	0.944	0.939	1.291	0.922	0.986
3446-7_2	SL004152	Interleukin-18 receptor 1	IL-18 Ra	Q13478	8809	IL18R1	Human	RFU	Protein	40	9525.55	9525.55	1.078	PASS	1.106	0.992	0.949	0.97	1.011	1.004	0.896	0.908	1.008	0.896	0.963	0.981	1.093	0.909	1.046
3447-64_2	SL000039	Interleukin-8	IL-8	P10145	3576	CXCL8	Human	RFU	Protein	40	632.25	632.25	0.699	PASS	0.748	0.787	0.892	0.848	0.909	0.914	0.882	0.937	0.829	0.883	0.792	0.908	0.674	0.832	0.822
3448-13_2	SL004125	Insulin receptor	IR	P06213	3643	INSR	Human	RFU	Protein	40	8743.3	8743.3	0.958	PASS	0.903	0.968	0.891	0.939	0.926	0.984	0.945	0.943	0.992	1.004	0.956	0.879	1.008	0.955	0.974
3449-58_2	SL004876	Kallistatin	Kallistatin	P29622	5267	SERPINA4	Human	RFU	Protein	0.005	35736.1	35736.1	1.105	PASS	1.106	1.034	1.065	1.077	1.133	1.134	1.066	1.01	1.155	1.015	1.046	0.995	1.188	1.017	1.07
3450-4_2	SL001797	Kallikrein-6	Kallikrein 6	Q92876	5653	KLK6	Human	RFU	Protein	40	7802.3	7802.3	1.303	FLAG	1.282	1.28	1.192	1.071	1.067	1.253	1.002	1.06	1.196	1.02	1.099	1.376	1.591	1.038	1.228
3452-17_2	SL006916	Tyrosine-protein kinase Lck	LCK	P06239	3932	LCK	Human	RFU	Protein	40	450.8	450.8	1.262	FLAG	1.569	1.041	1.235	1.057	1.073	1.353	1.005	1.056	1.263	1.043	1.042	1.452	1.773	1.038	1.357
3453-87_2	SL006917	Tyrosine-protein kinase Lyn	LYN	P07948	4067	LYN	Human	RFU	Protein	40	3105.85	3105.85	0.829	PASS	0.839	0.827	0.741	0.832	0.841	0.821	0.777	0.873	0.867	0.918	0.819	0.747	0.801	0.877	0.752
3457-57_1	SL005084	Periostin	Periostin	Q15063	10631	POSTN	Human	RFU	Protein	40	4479.7	4479.7	1.841	FLAG	1.677	1.758	1.52	1.643	1.583	1.612	1.548	1.558	1.679	1.791	1.849	1.482	1.649	1.764	1.677
3459-49_2	SL004155	Platelet-derived growth factor receptor beta	PDGF Rb	P09619	5159	PDGFRB	Human	RFU	Protein	40	5468.65	5468.65	0.766	FLAG	0.804	0.642	0.64	0.629	0.613	0.661	0.894	0.616	0.727	0.679	0.638	0.625	0.855	0.553	0.687
3461-58_1	SL009089	Brevican core protein	PGCB	Q96GW7	63827	BCAN	Human	RFU	Protein	40	1600	1600	0.729	PASS	0.748	0.695	0.68	0.65	0.652	0.693	0.787	0.676	0.694	0.742	0.712	0.717	0.697	0.698	0.708
3466-8_2	SL010513	cAMP-dependent protein kinase catalytic subunit alpha	PRKACA	P17612	5566	PRKACA	Human	RFU	Protein	40	696.25	696.25	0.336	FLAG	0.293	0.368	0.279	0.349	0.319	0.338	0.293	0.317	0.309	0.319	0.334	0.29	0.396	0.292	0.268
3469-74_1	SL010515	Ribosomal protein S6 kinase alpha-3	RPS6KA3	P51812	6197	RPS6KA3	Human	RFU	Protein	40	397.4	397.4	0.694	FLAG	0.826	0.645	0.794	0.629	0.591	0.679	0.564	0.62	0.784	0.583	0.591	0.888	0.789	0.563	0.794
3470-1_2	SL001945	E-selectin	sE-Selectin	P16581	6401	SELE	Human	RFU	Protein	1	28486.2	28486.2	1.029	PASS	0.954	1.007	0.992	1.022	0.991	0.994	0.96	1.001	1.007	1.005	1.015	0.967	1.04	1.08	1.005
3471-49_1	SL010517	Serine/threonine-protein kinase 16	STK16	O75716	8576	STK16	Human	RFU	Protein	40	1702.05	1702.05	1.193	PASS	1.143	1.272	1.322	1.283	1.078	1.186	1.075	1.12	1.094	1.116	1.237	1.247	1.321	1.227	1.091
3472-40_2	SL000582	Baculoviral IAP repeat-containing protein 5	Survivin	O15392	332	BIRC5	Human	RFU	Protein	40	479.9	479.9	0.797	PASS	0.911	0.876	1.072	0.998	1.039	1.059	0.933	1.035	0.958	1.005	0.897	1.194	0.774	0.939	0.855
3473-78_2	SL005224	Thrombopoietin Receptor	Thrombopoietin Receptor	P40238	4352	MPL	Human	RFU	Protein	40	161.3	161.3	0.45	FLAG	0.556	0.564	0.673	0.687	0.825	0.644	0.757	0.741	0.633	0.683	0.583	0.683	0.422	0.581	0.588
3474-19_2	SL002705	Thrombospondin-1	Thrombospondin-1	P07996	7057	THBS1	Human	RFU	Protein	0.005	3421.8	3421.8	2.057	FLAG	1.724	1.767	1.756	1.817	1.613	1.973	1.378	1.884	2.019	1.938	2.029	1.945	2.459	1.561	1.851
3477-63_2	SL005225	High affinity nerve growth factor receptor	TrkA	P04629	4914	NTRK1	Human	RFU	Protein	40	2660.5	2660.5	1.024	PASS	0.998	1.168	0.951	1.115	1.016	0.946	0.935	0.946	0.829	1.009	1.125	1.162	0.978	1.075	0.968
3479-71_2	SL006480	Trypsin-3	TRY3	P35030	5646	PRSS3	Human	RFU	Protein	40	438.5	438.5	0.62	FLAG	0.747	0.702	0.816	0.806	0.854	0.797	0.873	0.84	0.749	0.818	0.751	0.921	0.588	0.759	0.756
3480-7_1	SL008122	Dual specificity protein phosphatase 3	DUS3	P51452	1845	DUSP3	Human	RFU	Protein	40	1005.35	1005.35	1.163	PASS	1.058	1.127	1.038	0.96	1.05	1.041	0.995	1.096	1.075	0.982	1.12	1.023	1.062	1.088	1.072
3481-87_1	SL011073	Xaa-Pro aminopeptidase 1	XPNPEP1	Q9NQW7	7511	XPNPEP1	Human	RFU	Protein	40	3486.3	3486.3	0.553	FLAG	0.442	0.557	0.431	0.527	0.44	0.459	0.472	0.448	0.496	0.49	0.523	0.41	0.596	0.466	0.451
3484-60_2	SL000271	Angiotensinogen	Angiotensinogen	P01019	183	AGT	Human	RFU	Protein	0.005	7484.25	7484.25	1.015	PASS	1.034	0.835	0.885	0.852	0.826	0.801	0.883	0.7	0.888	0.726	0.893	0.831	0.942	0.752	1.017
3485-28_2	SL000283	Beta-2-microglobulin	b2-Microglobulin	P61769	567	B2M	Human	RFU	Protein	0.005	1453.5	1453.5	0.871	PASS	0.873	0.839	0.798	0.897	0.856	0.765	1.119	0.729	0.878	0.834	0.932	0.794	0.938	0.781	0.968
3486-58_2	SL000299	Fibroblast growth factor 1	b-ECGF	P05230	2246	FGF1	Human	RFU	Protein	40	182.45	182.45	0.725	PASS	0.885	0.802	0.97	0.891	1.011	0.91	0.968	1.044	0.921	0.973	0.803	1.001	0.673	0.891	0.96
3487-32_2	SL003167	C-X-C motif chemokine 13	BLC	O43927	10563	CXCL13	Human	RFU	Protein	40	3219.1	3219.1	1.289	FLAG	1.519	1.119	1.124	1.115	1.049	1.084	1.043	1.026	1.085	1.083	1.125	1.435	1.307	1.118	1.212
3488-64_2	SL000342	Catalase	Catalase	P04040	847	CAT	Human	RFU	Protein	1	15836.8	15836.8	1.168	FLAG	1.14	1.553	1.232	1.512	1.15	1.129	1.312	1.173	1.255	1.285	1.62	1.147	1.453	1.395	1.247
3489-9_2	SL004331	Ciliary neurotrophic factor	CNTF	P26441	1270	CNTF	Human	RFU	Protein	40	182.75	182.75	0.494	FLAG	0.607	0.683	0.971	0.843	1.004	0.862	0.859	0.987	0.747	0.9	0.694	1.002	0.517	0.774	0.763
3494-71_3	SL004335	Fibroblast growth factor 17	FGF-17	O60258	8822	FGF17	Human	RFU	Protein	40	192.5	192.5	0.656	PASS	0.791	0.81	0.976	0.95	1.097	0.99	0.99	1.113	0.892	1.017	0.842	1.016	0.641	0.906	0.832
3495-15_2	SL003172	C-X-C motif chemokine 6	GCP-2	P80162	6372	CXCL6	Human	RFU	Protein	40	1034.75	1034.75	0.562	FLAG	0.585	0.633	0.467	0.537	0.484	0.445	0.69	0.434	0.544	0.482	0.617	0.432	0.558	0.463	0.547
3497-13_2	SL002075	Interferon alpha-2	IFN-aA	P01563	3440	IFNA2	Human	RFU	Protein	40	136.85	136.85	0.786	FLAG	0.879	1.073	1.409	1.289	1.331	1.22	1.162	1.331	1.051	1.144	1.077	1.47	0.829	1.195	1.091
3499-77_2	SL004350	Interleukin-17B	IL-17B	Q9UHF5	27190	IL17B	Human	RFU	Protein	40	145.45	145.45	0.658	PASS	0.821	0.676	0.94	0.806	0.998	0.937	0.831	0.979	0.903	0.874	0.675	1.134	0.636	0.751	0.947
3503-4_2	SL003179	Integrin alpha-I: beta-1 complex	Integrin a1b1	P56199; P05556	3672 3688	ITGA1 ITGB1	Human	RFU	Protein	1	772.4	772.4	1.056	PASS	0.983	1.033	1.057	1.082	0.925	0.91	0.859	1.031	1.002	0.972	0.992	0.913	0.996	1.107	1.044
3504-58_2	SL004536	Hepcidin	LEAP-1	P81172	57817	HAMP	Human	RFU	Protein	1	9948.75	9948.75	0.894	PASS	0.968	0.851	0.892	0.788	0.833	0.807	0.834	0.781	0.801	0.785	0.847	0.859	0.82	0.82	0.878
3505-6_2	SL000507	Lymphotoxin alpha1:beta2	Lymphotoxin a1/b2	P01374; Q06643	4049 4050	LTA LTB	Human	RFU	Protein	40	112.05	112.05	0.503	FLAG	0.596	0.616	0.623	0.665	0.733	0.687	0.728	0.745	0.662	0.714	0.596	0.678	0.514	0.618	0.629
3506-49_1	SL000508	Lymphotoxin alpha2:beta1	Lymphotoxin a2/b1	P01374; Q06643	4049 4050	LTA LTB	Human	RFU	Protein	40	2403.3	2403.3	1.225	FLAG	1.458	1.122	1.337	1.102	1.055	1.232	0.999	1.127	1.382	1.035	1.105	1.366	1.5	1.064	1.254
3508-78_3	SL003187	C-C motif chemokine 22	MDC	O00626	6367	CCL22	Human	RFU	Protein	1	1317.55	1317.55	0.989	PASS	1.027	0.933	1.049	0.933	0.833	0.92	0.936	0.94	0.996	0.891	0.924	0.972	0.885	1.008	1.179
3509-1_1	SL003190	C-C motif chemokine 15	MIP-5	Q16663	6359	CCL15	Human	RFU	Protein	1	5029.5	5029.5	1.501	FLAG	1.674	1.223	1.478	1.203	1.102	1.12	1.041	1.276	1.426	1.143	1.207	1.201	1.314	1.45	1.586
3514-49_2	SL004008	Myeloblastin	Proteinase-3	P24158	5657	PRTN3	Human	RFU	Protein	1	4086.4	4086.4	1.297	PASS	1.273	1.209	1.088	1.135	1.032	1.073	1.122	0.973	1.161	1.046	1.249	1.158	1.301	1.055	1.174
3516-60_2	SL004712	Stromal cell-derived factor 1	SDF-1	P48061	6387	CXCL12	Human	RFU	Protein	1	4484.65	4484.65	0.906	PASS	0.91	0.803	0.909	0.757	0.809	0.794	1.003	0.813	0.931	0.858	0.785	0.737	0.755	0.847	0.952
3518-54_2	SL004015	Carboxypeptidase B2	TAFI	Q96IY4	1361	CPB2	Human	RFU	Protein	0.005	13120.4	13120.4	1.442	FLAG	1.259	1.341	1.253	1.457	1.267	1.231	1.108	1.117	1.294	1.263	1.391	1.313	1.626	1.254	1.314
3519-3_2	SL003196	C-C motif chemokine 17	TARC	Q92583	6361	CCL17	Human	RFU	Protein	40	1064.5	1064.5	1.109	FLAG	2.029	1.123	1.27	1.097	1.029	1.106	1.079	1.213	1.139	1.116	1.063	1.55	1.143	1.148	1.293
3520-58_1	SL000089	Transforming growth factor beta-3	TGF-b3	P10600	7043	TGFB3	Human	RFU	Protein	40	394.05	394.05	0.759	PASS	0.851	0.92	1.11	1.097	1.087	1.066	1.025	1.117	1.021	1.1	0.954	1.183	0.748	1.013	0.981
3521-16_2	SL000589	Thyroid Stimulating Hormone	TSH	P01215 P01222	1081 12372	CGA TSHB	Human	RFU	Protein	40	707.95	707.95	0.561	FLAG	0.578	0.508	0.492	0.51	0.516	0.521	0.594	0.502	0.621	0.557	0.553	0.487	0.638	0.512	0.545
3522-57_1	SL000615	Vasoactive Intestinal Peptide	Vasoactive Intestinal Peptide	P01282	7432	VIP	Human	RFU	Protein	40	230.1	230.1	0.899	PASS	1.033	1.077	1.144	1.108	1.184	1.104	1.147	1.172	1.133	1.19	1.052	1.14	0.902	1.135	1.092
3534-14_2	SL003862	CD40 ligand	CD40 ligand; soluble	P29965	959	CD40LG	Human	RFU	Protein	40	259.45	259.45	0.966	PASS	0.944	1.026	1.045	1.104	1.007	0.99	0.981	0.993	0.993	1.059	1.075	0.993	0.935	1.116	1.002
3535-84_1	SL004367	Dickkopf-related protein 1	DKK1	O94907	22943	DKK1	Human	RFU	Protein	40	23431.1	23431.1	0.973	PASS	1.012	0.932	0.917	0.902	0.927	0.953	0.927	1.005	1.011	1.003	0.918	0.896	0.89	1.021	0.941
3538-26_1	SL009216	Aromatic-L-amino-acid decarboxylase	dopa decarboxylase	P20711	1644	DDC	Human	RFU	Protein	40	207	207	0.824	PASS	0.82	0.982	0.982	0.998	1.04	0.958	1.036	1.059	0.944	1.082	0.971	0.981	0.831	1.048	0.957
3554-24_1	SL004258	Adiponectin	Adiponectin	Q15848	9370	ADIPOQ	Human	RFU	Protein	0.005	3366.35	3366.35	1.14	PASS	1.036	1.018	1.074	1.03	0.886	1.005	0.891	0.889	1.012	0.949	1.01	1.068	1.199	0.989	1.17
3580-25_8	SL000249	Alpha-1-antitrypsin	a1-Antitrypsin	P01009	5265	SERPINA1	Human	RFU	Protein	0.005	1058.1	1058.1	1.386	FLAG	1.238	1.403	1.157	1.404	1.185	1.189	1.217	1.138	1.198	1.245	1.56	1.281	1.554	1.336	1.263
3581-53_3	SL000251	Alpha-2-HS-glycoprotein	a2-HS-Glycoprotein	P02765	197	AHSG	Human	RFU	Protein	0.005	2013.9	2013.9	1.058	PASS	1.128	0.936	1.09	0.889	1.023	1.093	0.996	0.917	0.985	0.906	0.966	1.022	0.949	0.919	1.025
3583-54_4	SL005392	Arylsulfatase A	Arylsulfatase A	P15289	410	ARSA	Human	RFU	Protein	40	1021.7	1021.7	0.779	PASS	0.766	0.857	0.816	0.878	0.777	0.732	0.83	0.824	0.732	0.816	0.857	0.794	0.794	0.835	0.845
3585-54_4	SL009341	Basigin	BASI	P35613	682	BSG	Human	RFU	Protein	1	370.95	370.95	0.958	PASS	0.945	1.034	1.082	1.075	1.015	0.968	0.98	0.971	0.923	0.993	1.029	1.088	1.068	1.022	1.034
3587-53_2	SL007056	Bone morphogenetic protein 10	BMP10	O95393	27302	BMP10	Human	RFU	Protein	40	1925.75	1925.75	0.812	PASS	0.726	0.83	0.77	0.822	0.786	0.763	0.867	0.782	0.75	0.814	0.856	0.656	0.763	0.788	0.749
3591-51_3	SL004865	Cadherin-6	Cadherin-6	P55285	1004	CDH6	Human	RFU	Protein	1	496.8	496.8	1.629	FLAG	1.357	1.772	1.257	1.721	1.428	1.379	1.346	1.237	1.249	1.377	1.92	1.337	1.878	1.478	1.294
3592-4_3	SL010489	Calcium/calmodulin-dependent protein kinase type 1	CAMK1	Q14012	8536	CAMK1	Human	RFU	Protein	1	4361.35	4361.35	1.588	FLAG	1.697	1.383	1.232	1.356	1.172	1.177	1.242	1.151	1.221	1.185	1.627	1.188	1.634	1.334	1.302
3593-72_3	SL003711	Caspase-3	Caspase-3	P42574	836	CASP3	Human	RFU	Protein	40	3654.1	3654.1	0.693	FLAG	0.694	0.698	0.62	0.653	0.536	0.576	0.551	0.586	0.587	0.539	0.645	0.619	0.721	0.613	0.642
3594-6_5	SL007121	Cathepsin E	CATE	P14091	1510	CTSE	Human	RFU	Protein	40	429.85	429.85	0.724	PASS	0.79	0.864	1.002	1.002	1.02	0.896	1.015	1.037	0.876	1.023	0.902	1.005	0.72	0.933	0.945
3600-2_3	SL006029	Chitotriosidase-1	Chitotriosidase-1	Q13231	1118	CHIT1	Human	RFU	Protein	1	1199.2	1199.2	1.241	PASS	1.113	1.187	1.091	1.09	1.041	1.125	1.072	1.099	1.126	1.108	1.263	1.061	1.245	1.164	1.055
3601-54_3	SL008936	Neural cell adhesion molecule L1-like protein	CHL1	O00533	10752	CHL1	Human	RFU	Protein	1	11859.2	11859.2	1.124	PASS	1	1.046	0.98	1.031	1.031	1.037	1.188	0.95	1.118	1.014	1.143	0.927	1.202	0.962	1.031
3603-60_5	SL007640	C-type lectin domain family 7 member A	CLC7A	Q9BXN2	64581	CLEC7A	Human	RFU	Protein	40	595.05	595.05	1.028	PASS	1.055	1.133	1.244	1.216	1.212	1.151	1.176	1.204	1.14	1.239	1.139	1.139	0.993	1.186	1.141
3605-77_4	SL011049	Mannan-binding lectin serine protease 1	MASP3	P48740	5648	MASP1	Human	RFU	Protein	40	4852.7	4852.7	1.009	PASS	0.936	0.978	0.874	0.938	0.732	0.798	0.869	0.742	0.818	0.749	0.975	0.793	1.108	0.822	0.869
3606-2_1	SL004120	Discoidin domain-containing receptor 2	Discoidin domain receptor 2	Q16832	4921	DDR2	Human	RFU	Protein	40	5096.75	5096.75	1.172	PASS	1.091	1.085	0.942	1.091	1.112	0.973	1.369	0.97	0.97	1.003	1.14	0.865	1.152	1.023	1.104
3607-71_1	SL009412	Dickkopf-related protein 3	DKK3	Q9UBP4	27122	DKK3	Human	RFU	Protein	1	4978.55	4978.55	1.316	PASS	1.154	1.301	1.15	1.257	1.107	1.179	1.139	1.157	1.174	1.193	1.347	1.021	1.194	1.285	1.198
3608-12_1	SL008916	Dipeptidyl peptidase 2	DPP2	Q9UHL4	29952	DPP7	Human	RFU	Protein	1	1375.65	1375.65	1.032	PASS	0.918	1.09	0.867	1.039	0.887	0.877	0.936	0.895	0.93	0.929	1.148	0.903	1.172	1.017	0.89
3611-70_4	SL004060	Endothelin-converting enzyme 1	Endothelin-converting enzyme 1	P42892	1889	ECE1	Human	RFU	Protein	1	16241.9	16241.9	1.257	PASS	1.21	1.145	1.187	1.146	1.069	1.088	1.05	1.037	1.133	1.06	1.163	1.157	1.148	1.171	1.172
3612-6_4	SL004845	Ephrin type-B receptor 4	EphB4	P54760	2050	EPHB4	Human	RFU	Protein	1	2460.9	2460.9	1.16	PASS	1.047	1.186	0.971	1.112	1.093	1.17	1.075	1.13	1.173	1.124	1.3	1.085	1.333	1.175	1.035
3613-62_1	SL010462	Ficolin-1	FCN1	O00602	2219	FCN1	Human	RFU	Protein	40	1728.7	1728.7	0.852	PASS	0.751	0.881	0.702	0.83	0.707	0.718	0.793	0.71	0.724	0.759	0.862	0.692	0.948	0.77	0.71
3616-3_5	SL008504	N-acetylglucosamine-6-sulfatase	GNS	P15586	2799	GNS	Human	RFU	Protein	40	2540.5	2540.5	0.827	PASS	0.872	0.864	0.882	0.897	0.757	0.761	0.736	0.748	0.798	0.727	0.871	0.837	0.835	0.854	0.889
3617-80_4	SL006512	Hepatocyte growth factor activator	HGFA	Q04756	3083	HGFAC	Human	RFU	Protein	0.005	3278.8	3278.8	0.916	PASS	0.876	0.911	0.833	0.907	0.901	0.879	1.151	0.797	0.913	0.896	0.941	0.737	0.97	0.88	0.933
3620-67_2	SL007806	Interleukin-22 receptor subunit alpha-1	IL22RA1	Q8N6P7	58985	IL22RA1	Human	RFU	Protein	40	726.5	726.5	1.224	FLAG	1.364	1.231	1.374	1.279	1.089	1.155	1.099	1.154	1.116	1.142	1.195	1.485	1.278	1.184	1.165
3622-33_4	SL008909	Legumain	LGMN	Q99538	5641	LGMN	Human	RFU	Protein	1	2340.2	2340.2	0.984	PASS	0.937	1.085	0.868	1.047	1.018	1.047	1.019	0.932	0.944	1.034	1.172	0.894	1.122	0.996	0.884
3623-84_4	SL007059	Lymphocyte antigen 86	LY86	O95711	9450	LY86	Human	RFU	Protein	1	3464.1	3464.1	1.099	PASS	1.034	1.046	0.908	1.026	0.998	0.959	1.048	0.935	1.019	0.984	1.177	0.99	1.114	1.053	0.913
3624-3_4	SL011069	Serine protease 27	Marapsin	Q9BQR3	83886	PRSS27	Human	RFU	Protein	40	6229.45	6229.45	1.576	FLAG	1.594	1.345	1.227	1.239	1.059	1.277	1.042	1.094	1.23	1.123	1.362	1.309	1.587	1.304	1.222
3627-71_4	SL010376	Membrane metallo-endopeptidase-like 1	MMEL2	Q495T6	79258	MMEL1	Human	RFU	Protein	40	950.15	950.15	0.983	PASS	1.007	1.02	1.035	1.061	1.041	1.023	1.023	0.994	0.995	1.039	1.04	1.03	0.978	1.045	0.986
3628-3_4	SL010501	Dual specificity mitogen-activated protein kinase kinase 2	MP2K2	P36507	5605	MAP2K2	Human	RFU	Protein	1	1223.45	1223.45	1.177	PASS	1.056	1.149	0.936	1.071	1.107	1.131	1.035	1.012	1.151	1.13	1.192	1.015	1.262	1.046	0.975
3629-60_4	SL006805	Serine/threonine-protein kinase MRCK beta	MRCKB	Q9Y5S2	9578	CDC42BPB	Human	RFU	Protein	40	961.35	961.35	1.123	PASS	1.067	1.113	1.069	1.077	0.998	1.104	1.061	1.031	1.032	1.069	1.098	1.105	1.154	1.06	1
3630-27_4	SL004804	Cell adhesion molecule 3	Nectin-like protein 1	Q8N126	57863	CADM3	Human	RFU	Protein	40	1303.85	1303.85	0.813	PASS	0.782	0.857	0.746	0.816	0.723	0.771	0.775	0.739	0.698	0.774	0.853	0.722	0.903	0.777	0.741
3633-70_5	SL008193	Nidogen-2	NID2	Q14112	22795	NID2	Human	RFU	Protein	1	2210.45	2210.45	0.772	FLAG	0.744	0.879	0.602	0.835	0.746	0.656	1.013	0.637	0.718	0.685	0.927	0.581	0.908	0.677	0.723
3634-5_4	SL005491	Opioid-binding protein/cell adhesion molecule	OBCAM	Q14982	4978	OPCML	Human	RFU	Protein	1	2617.55	2617.55	1.153	FLAG	1.022	1.112	1.018	1.101	0.975	1.136	0.98	0.995	1.031	1.02	1.266	1.062	1.438	1.081	0.922
3635-76_4	SL010530	OCIA domain-containing protein 1	OCAD1	Q9NX40	54940	OCIAD1	Human	RFU	Protein	40	833.3	833.3	1.284	PASS	1.278	1.195	1.127	1.193	1.094	1.098	1.098	1.082	1.195	1.122	1.228	1.202	1.267	1.181	1.166
3636-37_4	SL007327	Oxidized low-density lipoprotein receptor 1	OLR1	P78380	4973	OLR1	Human	RFU	Protein	40	2033.5	2033.5	0.733	PASS	0.75	0.765	0.786	0.8	0.797	0.727	0.807	0.757	0.825	0.809	0.791	0.74	0.709	0.802	0.721
3640-14_3	SL005263	alpha-2-macroglobulin receptor-associated protein	RAP	P30533	4043	LRPAP1	Human	RFU	Protein	1	813.75	813.75	1.022	PASS	1.014	0.997	0.967	1.038	1.035	1.043	0.94	1	1.009	1.035	1.051	1.014	1.172	1.045	0.997
3642-4_1	SL008588	SLAM family member 5	SLAF5	Q9UIB8	8832	CD84	Human	RFU	Protein	40	5535.45	5535.45	0.911	PASS	1.014	0.872	0.814	0.743	0.753	0.771	0.903	0.729	0.808	0.735	0.801	0.91	1.054	0.71	0.909
3643-90_2	SL008760	SLIT and NTRK-like protein 1	SLIK1	Q96PX8	114798	SLITRK1	Human	RFU	Protein	40	1297.4	1297.4	1.012	PASS	0.915	1.106	1.019	1.093	1.05	1.029	1.037	1.032	0.975	1.066	1.129	1.059	0.977	1.114	0.991
3644-5_4	SL010381	Dickkopf-like protein 1	Soggy-1	Q9UK85	27120	DKKL1	Human	RFU	Protein	1	2500.95	2500.95	1.278	FLAG	1.276	1.21	1.028	1.107	0.956	1.3	0.921	0.984	1.085	0.979	1.311	1.197	1.742	1.104	1.136
3646-7_4	SL010518	Tyrosine-protein kinase Tec	TEC	P42680	7006	TEC	Human	RFU	Protein	40	1491.35	1491.35	0.977	PASS	0.912	0.993	1.006	1.037	1.075	1.018	1.067	1.081	0.993	1.11	1.031	0.935	0.92	1.044	0.964
3647-49_4	SL018625	Toll-like receptor 4:Lymphocyte antigen 96 complex	TLR4:MD-2 complex	O00206 Q9Y6Y9	7099 23643	TLR4 LY96	Human	RFU	Protein	40	4807.15	4807.15	0.882	PASS	0.887	0.905	0.96	0.96	0.914	0.896	0.878	0.919	0.93	0.925	0.94	0.901	0.858	0.963	0.962
3651-50_5	SL003201	Vascular endothelial growth factor receptor 2	VEGF sR2	P35968	3791	KDR	Human	RFU	Protein	1	7535.6	7535.6	1.021	PASS	0.94	0.992	0.921	0.981	1.026	0.999	0.972	0.947	1.005	1.04	1.029	0.949	1.066	1.011	0.929
3654-27_5	SL007531	BMP-binding endothelial regulator protein	BMPER	Q8N8U9	168667	BMPER	Human	RFU	Protein	40	456.35	456.35	1.452	FLAG	1.315	1.526	1.444	1.519	1.471	1.475	1.481	1.485	1.415	1.606	1.57	1.32	1.331	1.574	1.431
3656-9_1	SL004864	Cadherin-12	Cadherin-12	P55289	1010	CDH12	Human	RFU	Protein	40	549.05	549.05	1.06	PASS	1.022	1.159	1.139	1.224	1.072	1.058	1.059	1.092	1.034	1.163	1.168	1.119	1.069	1.174	1.116
3657-74_3	SL004720	Calcineurin subunit B type 1	Calcineurin B a	P63098	5534	PPP3R1	Human	RFU	Protein	1	6284.05	6284.05	1.05	PASS	0.921	1.161	1	1.09	0.942	1.149	0.959	1.038	0.963	1.035	1.263	1.052	1.332	1.095	0.866
3666-17_4	SL006830	Complement factor H-related protein 5	complement factor H-related 5	Q9BXR6	81494	CFHR5	Human	RFU	Protein	0.005	1100.6	1100.6	1.255	PASS	0.981	1.196	1.035	1.159	1.011	1.147	1.034	1.15	1.181	1.154	1.302	1.128	1.347	1.145	1.111
3676-15_3	SL003679	Cation-independent mannose-6-phosphate receptor	IGF-II receptor	P11717	3482	IGF2R	Human	RFU	Protein	1	32067.2	32067.2	1.339	PASS	1.327	1.207	1.262	1.217	1.075	1.148	0.997	1.116	1.236	1.076	1.225	1.267	1.355	1.205	1.201
3681-87_3	SL003919	Kallikrein-14	kallikrein 14	Q9P0G3	43847	KLK14	Human	RFU	Protein	1	7225	7225	1.108	FLAG	0.93	1.166	1.119	1.052	0.897	1.24	0.922	0.991	0.974	1.014	1.208	1.084	1.399	1.091	0.916
3684-78_3	SL004580	Macrophage scavenger receptor types I and II	Macrophage scavenger receptor	P21757	4481	MSR1	Human	RFU	Protein	40	977.6	977.6	1.086	PASS	1.017	1.098	1.054	1.146	1.046	1.075	1.027	1.079	1.08	1.156	1.133	1.1	1.036	1.158	1.077
3685-53_1	SL010466	Membrane frizzled-related protein	MFRP	Q9BY79	83552	MFRP	Human	RFU	Protein	40	1508.6	1508.6	1.181	PASS	1.176	1.245	1.195	1.244	1.179	1.12	1.181	1.255	1.165	1.294	1.271	1.161	1.091	1.278	1.192
3707-12_2	SL000254	Serum albumin	Albumin	P02768	213	ALB	Human	RFU	Protein	0.005	7500.95	7500.95	0.745	PASS	0.783	0.691	0.692	0.789	0.879	0.703	0.766	0.708	0.739	0.754	0.778	0.634	0.681	0.717	0.726
3708-62_1	SL000252	Alpha-2-macroglobulin	a2-Macroglobulin	P01023	2	A2M	Human	RFU	Protein	1	11103.4	11103.4	1.174	PASS	1.085	1.136	0.893	1.047	0.979	0.937	0.943	0.912	0.899	0.92	1.38	1.136	1.249	1.125	0.944
3709-4_2	SL000617	Alanine aminotransferase 1	ALT	P24298	2875	GPT	Human	RFU	Protein	1	2784.05	2784.05	1.015	PASS	0.895	1.025	0.828	1.051	0.954	0.866	1.051	0.925	0.943	0.92	1.168	0.852	0.97	1.052	0.815
3710-49_2	SL000268	Angiostatin	Angiostatin	P00747	5340	PLG	Human	RFU	Protein	1	20777.2	20777.2	0.769	PASS	0.799	0.787	0.833	0.846	0.895	0.787	0.86	0.793	0.867	0.813	0.818	0.797	0.775	0.785	0.947
3714-49_2	SL000382	Creatine kinase M-type:Creatine kinase B-type heterodimer	CK-MB	P12277 P06732	1152 1158	CKB CKM	Human	RFU	Protein	1	560.65	560.65	0.814	FLAG	0.746	0.831	0.661	0.709	0.667	0.748	0.545	0.519	0.759	0.713	0.827	0.778	1.113	0.641	0.667
3719-2_2	SL000076	Cyclin-dependent kinase inhibitor 1B	p27Kip1	P46527	1027	CDKN1B	Human	RFU	Protein	40	1108.65	1108.65	0.878	PASS	0.84	0.937	0.87	0.961	0.947	0.909	0.98	0.954	0.916	1.009	0.993	0.846	0.803	0.969	0.926
3723-1_2	SL000306	Brain natriuretic peptide 32	BNP-32	P16860	4879	NPPB	Human	RFU	Protein	40	386.45	386.45	0.6	PASS	0.672	0.771	0.9	0.894	0.979	0.877	0.892	0.975	0.788	0.924	0.802	0.89	0.613	0.836	0.813
3727-35_1	SL011509	Peptide YY	PYY	P10082	5697	PYY	Human	RFU	Protein	40	2346.6	2346.6	0.841	PASS	0.925	0.918	0.902	0.851	0.95	0.9	1.193	0.928	0.987	0.96	0.928	0.799	0.803	0.924	1.018
3728-52_2	SL000570	Secretin	Secretin	P09683	6343	SCT	Human	RFU	Protein	40	193.05	193.05	0.677	PASS	0.692	0.783	0.875	0.85	0.934	0.847	0.911	0.913	0.827	0.922	0.816	0.818	0.631	0.819	0.8
3730-81_2	SL011448	Tumor necrosis factor receptor superfamily member 4	TNR4	P43489	7293	TNFRSF4	Human	RFU	Protein	40	512.6	512.6	0.692	PASS	0.725	0.798	0.83	0.843	0.993	0.85	0.972	0.917	0.812	0.888	0.851	0.811	0.654	0.861	0.803
3738-54_1	SL002684	Macrophage colony-stimulating factor 1	CSF-1	P09603	1435	CSF1	Human	RFU	Protein	40	1096.35	1096.35	0.58	FLAG	0.524	0.635	0.568	0.577	0.556	0.533	0.588	0.578	0.523	0.587	0.659	0.53	0.551	0.607	0.557
3758-68_3	SL003974	Activated Protein C	Activated Protein C	P04070	5624	PROC	Human	RFU	Protein	40	1084.55	1084.55	1.065	PASS	1.013	1.1	1.053	1.1	1.045	1.019	1.085	1.034	1.041	1.072	1.137	0.978	1.065	1.106	1.097
3761-4_2	SL000027	Prostaglandin G/H synthase 2	COX-2	P35354	5743	PTGS2	Human	RFU	Protein	40	2186.5	2186.5	1.24	PASS	1.17	1.177	1.185	1.145	1.226	1.289	1.217	1.301	1.341	1.353	1.165	1.215	1.032	1.256	1.27
3766-51_4	SL004304	Syntaxin-1A	STX1a	Q16623	6804	STX1A	Human	RFU	Protein	40	366.05	366.05	0.668	PASS	0.716	0.852	0.905	0.934	1.044	0.902	0.955	1.023	0.866	1.017	0.857	0.942	0.65	0.935	0.825
3773-15_4	SL003200	Angiopoietin-1 receptor; soluble	sTie-2	Q02763	7010	TEK	Human	RFU	Protein	40	1841.45	1841.45	1.034	PASS	0.916	0.983	0.815	0.843	0.844	0.892	1.013	0.829	0.959	0.904	0.956	0.787	1.021	0.874	0.936
3795-6_2	SL004642	Disintegrin and metalloproteinase domain-containing protein 9	ADAM 9	Q13443	8754	ADAM9	Human	RFU	Protein	40	1914.3	1914.3	1.428	FLAG	1.235	1.27	1.324	1.345	1.213	1.227	1.366	1.233	1.374	1.344	1.439	1.06	1.366	1.324	1.459
3796-79_2	SL007642	Angiopoietin-related protein 4	ANGL4	Q9BY76	51129	ANGPTL4	Human	RFU	Protein	40	4116.15	4116.15	1.359	FLAG	1.237	1.408	1.282	1.407	1.183	1.224	1.059	1.125	1.178	1.222	1.398	1.301	1.446	1.369	1.28
3797-1_1	SL000638	Cadherin-2	Cadherin-2	P19022	1000	CDH2	Human	RFU	Protein	40	1761.4	1761.4	1.122	PASS	0.895	1.138	0.951	1.04	0.923	0.959	1.007	0.957	0.992	1.04	1.095	0.889	1.081	1.069	1.004
3798-71_1	SL005508	Carbonic anhydrase 9	Carbonic anhydrase 9	Q16790	768	CA9	Human	RFU	Protein	40	1934.9	1934.9	1.004	PASS	0.828	1.039	0.892	1.065	0.915	0.89	0.838	0.87	0.852	0.88	1.082	0.92	1.041	0.983	0.91
3799-11_2	SL004867	Carbonic anhydrase 3	Carbonic anhydrase III	P07451	761	CA3	Human	RFU	Protein	1	1666.1	1666.1	0.916	PASS	0.936	0.943	0.939	0.89	0.966	1.005	1.084	0.918	0.945	1.041	1.006	0.784	0.86	0.947	0.883
3800-71_2	SL000377	Creatine kinase B-type	CK-BB	P12277	1152	CKB	Human	RFU	Protein	40	932.55	932.55	1	PASS	0.9	1.018	0.92	0.983	0.949	0.91	1.027	0.947	0.968	1.011	1.036	0.927	0.934	1.017	1.012
3802-50_1	SL007888	Cystatin-S	Cystatin-S	P01036	1472	CST4	Human	RFU	Protein	40	171.55	171.55	0.705	PASS	0.654	0.763	0.762	0.824	0.697	0.691	0.722	0.728	0.706	0.712	0.789	0.751	0.705	0.782	0.764
3803-10_2	SL008382	Cystatin-D	CYTD	P28325	1473	CST5	Human	RFU	Protein	40	6484.5	6484.5	0.716	PASS	0.759	0.783	0.8	0.764	0.759	0.754	0.859	0.823	0.81	0.781	0.771	0.726	0.691	0.87	0.871
3805-16_2	SL010458	Endothelial cell-specific molecule 1	Endocan	Q9NQ30	11082	ESM1	Human	RFU	Protein	1	1049.85	1049.85	0.891	PASS	0.896	0.92	0.871	0.888	0.883	0.9	0.997	0.861	0.897	0.908	0.939	0.818	0.9	0.926	0.869
3806-55_1	SL004844	Ephrin type-A receptor 5	EphA5	P54756	2044	EPHA5	Human	RFU	Protein	40	817.6	817.6	0.834	PASS	0.8	0.9	0.822	0.876	0.765	0.77	0.845	0.798	0.781	0.827	0.863	0.757	0.899	0.865	0.851
3807-1_2	SL007651	Fibroblast growth factor 23	FGF23	Q9GZV9	8074	FGF23	Human	RFU	Protein	40	606.65	606.65	0.917	PASS	0.943	1.045	1.012	1.045	1.023	0.979	1.08	0.978	1.003	1.037	1.03	0.953	0.911	1.002	1.047
3808-76_2	SL003990	Fibroblast growth factor receptor 2	FGFR-2	P21802	2263	FGFR2	Human	RFU	Protein	40	273.95	273.95	0.762	PASS	0.906	0.894	0.931	0.973	0.993	0.879	0.964	0.961	0.878	0.947	0.911	1.052	0.781	0.904	0.91
3809-1_2	SL004063	Fibroblast growth factor receptor 3	FGFR-3	P22607	2261	FGFR3	Human	RFU	Protein	40	740	740	0.928	PASS	0.92	1.11	1.138	1.191	1.18	1.105	1.147	1.195	1.006	1.203	1.131	1.072	0.878	1.149	1
3810-50_2	SL006912	Tyrosine-protein kinase Fgr	FGR	P09769	2268	FGR	Human	RFU	Protein	40	331.2	331.2	1.063	PASS	1.274	1.089	1.142	1.177	1.174	1.126	1.165	1.151	1.099	1.182	1.117	1.14	0.998	1.127	1.192
3813-3_2	SL006913	Tyrosine-protein kinase Fyn	FYN	P06241	2534	FYN	Human	RFU	Protein	40	3010.15	3010.15	0.793	PASS	0.799	0.832	0.816	0.856	0.757	0.756	0.744	0.822	0.788	0.84	0.778	0.731	0.816	0.85	0.811
3815-14_1	SL007620	Interleukin-12 receptor subunit beta-2	IL-12 RB2	Q99665	3595	IL12RB2	Human	RFU	Protein	40	1611.4	1611.4	1.379	PASS	1.25	1.362	1.242	1.321	1.185	1.24	1.319	1.19	1.278	1.293	1.399	1.176	1.298	1.351	1.295
3817-18_1	SL007358	Protein kinase C theta type	KPCT	Q04759	5588	PRKCQ	Human	RFU	Protein	40	1695.75	1695.75	1.232	PASS	1.219	1.279	1.073	1.3	1.002	0.984	1.158	1.027	1.065	1.085	1.296	0.981	1.307	1.168	1.143
3820-68_2	SL010503	MAP kinase-activated protein kinase 2	MAPK2	P49137	9261	MAPKAPK2	Human	RFU	Protein	40	2512.15	2512.15	1.017	PASS	0.961	1.031	0.861	1.037	0.886	0.847	1.029	0.939	0.954	0.972	1.072	0.824	1.055	0.968	0.889
3821-28_1	SL010504	MAP kinase-activated protein kinase 5	MAPK5	Q8IW41	8550	MAPKAPK5	Human	RFU	Protein	40	582	582	1.18	PASS	1.247	1.238	1.142	1.161	1.022	1.022	1.107	1.052	1.002	1.071	1.195	1.135	1.356	1.157	1.209
3822-54_2	SL004765	MAP kinase-activated protein kinase 3	MAPKAPK3	Q16644	7867	MAPKAPK3	Human	RFU	Protein	1	708.95	708.95	1.001	PASS	1.01	1.052	0.96	1.061	0.922	0.868	1.006	0.944	0.929	0.949	1.085	0.897	0.984	1.012	1.018
3823-9_1	SL010505	Megakaryocyte-associated tyrosine-protein kinase	MATK	P42679	4145	MATK	Human	RFU	Protein	40	443.3	443.3	0.681	PASS	0.677	0.749	0.763	0.831	0.81	0.774	0.753	0.777	0.766	0.842	0.767	0.805	0.645	0.806	0.762
3825-18_2	SL010502	Mitogen-activated protein kinase 8	MK08	P45983	5599	MAPK8	Human	RFU	Protein	40	614.35	614.35	0.959	PASS	0.939	0.961	0.903	0.996	0.95	0.91	0.984	0.942	0.975	1.008	0.985	0.855	0.912	0.947	0.942
3827-22_1	SL010509	Serine/threonine-protein kinase PAK 6	PAK6	Q9NQU5	56924	PAK6	Human	RFU	Protein	40	2358.65	2358.65	1.033	PASS	1	0.941	0.875	0.947	0.801	0.836	0.826	0.916	0.928	0.924	0.932	0.857	0.96	1.005	0.95
3828-54_2	SL011071	Platelet-derived growth factor C	PDGF-CC	Q9NRA1	56034	PDGFC	Human	RFU	Protein	40	400.45	400.45	0.975	PASS	1.016	1.036	1.12	1.133	1.039	0.988	1.038	1.056	1.015	1.059	1.054	1.056	0.957	1.065	1.098
3831-21_1	SL003761	Phosphatidylinositol 3;4;5-trisphosphate 3-phosphatase and dual-specificity protein phosphatase PTEN	pTEN	P60484	5728	PTEN	Human	RFU	Protein	40	653.6	653.6	0.869	PASS	1.059	0.856	0.746	0.802	0.714	0.766	0.757	0.729	0.802	0.781	0.824	0.716	0.876	0.803	0.805
3832-51_1	SL010514	Protein-tyrosine kinase 6	PTK6	Q13882	5753	PTK6	Human	RFU	Protein	40	307.2	307.2	0.664	PASS	0.655	0.728	0.669	0.725	0.763	0.688	0.761	0.676	0.699	0.777	0.747	0.697	0.649	0.718	0.695
3835-11_2	SL004492	Toll-like receptor 2	TLR2	O60603	7097	TLR2	Human	RFU	Protein	40	499.75	499.75	0.603	FLAG	0.59	0.727	0.645	0.761	0.675	0.605	0.743	0.684	0.645	0.677	0.731	0.666	0.638	0.668	0.624
3836-51_2	SL010528	Ubiquitin-fold modifier 1	UFM1	P61960	51569	UFM1	Human	RFU	Protein	40	2041.5	2041.5	0.517	FLAG	0.54	0.568	0.491	0.554	0.508	0.503	0.706	0.527	0.522	0.528	0.591	0.462	0.618	0.49	0.48
3839-60_2	SL011629	AH receptor-interacting protein	AIP	O00170	9049	AIP	Human	RFU	Protein	40	3179	3179	1.464	FLAG	1.561	1.389	1.425	1.481	1.399	1.317	1.385	1.469	1.337	1.508	1.482	1.419	1.4	1.573	1.435
3844-2_1	SL004823	Peptidyl-prolyl cis-trans isomerase A	Cyclophilin A	P62937	5478	PPIA	Human	RFU	Protein	1	75665.9	75665.9	1.176	PASS	1.168	1.044	1.139	1.087	1.002	1.031	0.936	1.016	1.086	0.908	1.062	0.961	1.065	1.125	1.057
3845-51_2	SL011530	Dynein light chain roadblock-type 1	DLRB1	Q9NP97	83658	DYNLRB1	Human	RFU	Protein	40	1140.35	1140.35	0.82	FLAG	0.662	0.804	0.784	0.737	0.743	0.771	0.734	0.864	0.846	0.893	0.68	0.583	0.695	0.672	0.791
3847-56_2	SL011532	Persulfide dioxygenase ETHE1; mitochondrial	ETHE1	O95571	23474	ETHE1	Human	RFU	Protein	40	3419.45	3419.45	1.714	FLAG	1.573	1.504	1.413	1.491	1.383	1.425	1.467	1.333	1.534	1.556	1.635	1.383	1.535	1.416	1.522
3848-14_2	SL003785	Glyceraldehyde-3-phosphate dehydrogenase	GAPDH; liver	P04406	2597	GAPDH	Human	RFU	Protein	1	42752.6	42752.6	1.157	PASS	1.08	1.093	0.978	1.107	1.037	0.963	0.965	1.103	1.176	1.028	1.066	0.94	1.095	1.119	1.024
3852-19_2	SL000449	DnaJ homolog subfamily B member 1	HSP 40	P25685	3337	DNAJB1	Human	RFU	Protein	40	300.7	300.7	0.598	PASS	0.66	0.635	0.609	0.659	0.752	0.687	0.708	0.753	0.696	0.782	0.65	0.633	0.626	0.659	0.618
3853-56_1	SL008102	Malate dehydrogenase; cytoplasmic	MDHC	P40925	4190	MDH1	Human	RFU	Protein	1	17327.2	17327.2	1.226	PASS	1.183	1.13	1.104	1.11	1.179	1.181	1.07	1.157	1.254	1.206	1.143	1.108	1.163	1.248	1.142
3854-24_1	SL011631	Nascent polypeptide-associated complex subunit alpha	NACA	Q13765	4666	NACA	Human	RFU	Protein	40	3419.5	3419.5	1.086	PASS	1.091	1.109	0.965	0.981	0.845	0.843	0.91	1.018	0.945	0.964	1.03	0.893	1.297	1.047	0.979
3855-56_1	SL004919	Peroxiredoxin-1	Peroxiredoxin-1	Q06830	5052	PRDX1	Human	RFU	Protein	1	1651.35	1651.35	1.26	FLAG	1.177	1.284	1.18	1.351	1.26	1.195	1.115	1.283	1.279	1.249	1.42	1.105	1.152	1.371	1.309
3858-5_1	SL008063	Low molecular weight phosphotyrosine protein phosphatase	PPAC	P24666	52	ACP1	Human	RFU	Protein	40	3122.8	3122.8	0.779	PASS	0.911	0.764	0.783	0.65	0.77	0.698	1.041	0.782	0.751	0.755	0.743	0.725	0.713	0.734	0.807
3859-50_2	SL010973	Proteasome subunit alpha type-1	PSA1	P25786	5682	PSMA1	Human	RFU	Protein	40	471.55	471.55	0.629	PASS	0.805	0.771	0.826	0.859	0.881	0.799	0.852	0.881	0.759	0.832	0.775	0.883	0.649	0.816	0.746
3860-7_2	SL005630	Proteasome subunit alpha type-6	PSA6	P60900	5687	PSMA6	Human	RFU	Protein	40	483.1	483.1	0.76	PASS	0.805	0.845	0.854	0.859	0.926	0.888	0.896	0.992	0.924	0.972	0.852	0.851	0.744	0.937	0.851
3864-5_2	SL011528	40S ribosomal protein S7	RS7	P62081	6201	RPS7	Human	RFU	Protein	40	734.25	734.25	0.988	PASS	1.049	0.991	0.983	0.97	0.989	1.003	0.956	1.024	1.016	1.004	1.008	1.06	0.931	1.021	1.08
3865-53_1	SL006919	Ribosomal protein S6 kinase alpha-5	RSK-like protein kinase	O75582	9252	RPS6KA5	Human	RFU	Protein	40	140.6	140.6	0.526	FLAG	0.613	0.703	0.806	0.835	0.949	0.711	0.792	0.927	0.693	0.851	0.741	0.868	0.514	0.819	0.684
3866-7_2	SL011529	Ribosome maturation protein SBDS	SBDS	Q9Y3A5	51119	SBDS	Human	RFU	Protein	40	4135.75	4135.75	1.144	PASS	1.055	1.081	0.998	1.002	1.12	1.136	1.053	1.208	1.202	1.32	1.067	0.938	1.062	1.095	1.092
3867-49_1	SL011630	Seizure 6-like protein 2	SE6L2	Q6UXD5	26470	SEZ6L2	Human	RFU	Protein	40	1396.45	1396.45	1.357	PASS	1.262	1.313	1.195	1.24	1.137	1.227	1.096	1.232	1.285	1.303	1.303	1.175	1.259	1.385	1.272
3868-8_1	SL011533	Small glutamine-rich tetratricopeptide repeat-containing protein alpha	SGTA	O43765	6449	SGTA	Human	RFU	Protein	40	1309.2	1309.2	0.638	FLAG	0.657	0.631	0.551	0.582	0.565	0.571	0.585	0.607	0.59	0.624	0.622	0.559	0.648	0.636	0.583
3872-2_1	SL005679	Translationally-controlled tumor protein	TCTP	P13693	7178	TPT1	Human	RFU	Protein	1	5693.05	5693.05	0.843	PASS	0.822	0.813	0.81	0.753	0.826	0.78	0.89	0.858	0.814	0.847	0.784	0.738	0.776	0.89	0.837
3873-51_2	SL000588	Thyroid peroxidase	TMA	P07202	7173	TPO	Human	RFU	Protein	40	1496.95	1496.95	1.198	PASS	1.278	1.224	1.241	1.226	1.145	1.265	1.132	1.205	1.194	1.227	1.235	1.204	1.334	1.249	1.156
3874-8_1	SL008157	Ubiquitin-conjugating enzyme E2 L3	UB2L3	P68036	7332	UBE2L3	Human	RFU	Protein	40	925.25	925.25	0.787	PASS	0.79	0.881	0.787	0.845	0.867	0.82	0.823	0.955	0.883	0.946	0.849	0.828	0.768	0.94	0.78
3875-62_1	SL011549	AT-rich interactive domain-containing protein 3A	ARI3A	Q99856	1820	ARID3A	Human	RFU	Protein	40	444.35	444.35	0.953	PASS	0.98	1.095	1.026	1.049	1.127	1.08	1.088	1.158	1.083	1.176	1.091	0.966	0.901	1.201	1.042
3877-67_2	SL004938	Calcium/calmodulin-dependent protein kinase kinase 1	CaMKK alpha	Q8N5S9	84254	CAMKK1	Human	RFU	Protein	1	240.35	240.35	0.988	PASS	0.89	1.023	0.852	0.931	0.918	0.927	0.983	0.946	0.973	0.934	0.994	0.838	0.927	0.972	0.924
3879-50_1	SL011232	Hsp90 co-chaperone Cdc37	CDC37	Q16543	11140	CDC37	Human	RFU	Protein	40	447.75	447.75	0.752	FLAG	0.754	0.82	0.642	0.795	0.624	0.565	0.773	0.602	0.74	0.62	0.85	0.596	0.744	0.614	0.789
3881-49_2	SL003753	Dynein light chain 1; cytoplasmic	DLC8	P63167	8655	DYNLL1	Human	RFU	Protein	40	447.6	447.6	0.794	PASS	0.761	0.936	0.902	0.948	0.988	0.902	0.958	0.962	0.913	0.968	0.942	0.872	0.782	0.948	0.883
3887-90_2	SL010927	Importin subunit beta-1	IMB1	Q14974	3837	KPNB1	Human	RFU	Protein	40	3062.7	3062.7	0.35	FLAG	0.336	0.377	0.3	0.363	0.315	0.312	0.336	0.345	0.332	0.314	0.345	0.276	0.406	0.316	0.312
3888-8_1	SL009628	Inhibitor of growth protein 1	ING1	Q9UK53	3621	ING1	Human	RFU	Protein	40	9942.3	9942.3	1.507	FLAG	1.424	1.385	1.205	1.234	1.206	1.265	1.316	1.34	1.406	1.421	1.443	1.25	1.299	1.511	1.525
3889-64_2	SL006132	Lamin-B1	Lamin-B1	P20700	4001	LMNB1	Human	RFU	Protein	40	561	561	0.921	PASS	0.986	0.982	0.975	0.954	1.006	1.081	0.944	1.073	1.065	1.013	0.963	0.949	0.976	1.045	1.049
3890-8_2	SL000493	L-lactate dehydrogenase B chain	LDH-H 1	P07195	3945	LDHB	Human	RFU	Protein	0.005	858.55	858.55	1.229	PASS	1.062	1.138	1.016	1.079	1.121	1.108	1.028	1.108	1.177	1.155	1.197	1.011	1.135	1.212	1.185
3891-56_1	SL009629	Methyl-CpG-binding domain protein 4	MBD4	O95243	8930	MBD4	Human	RFU	Protein	40	1125.05	1125.05	1.187	PASS	1.228	1.186	1.122	1.107	1.126	1.151	1.075	1.175	1.133	1.172	1.164	1.156	1.053	1.205	1.164
3893-64_1	SL001905	Mesothelin	Mesothelin	Q13421	10232	MSLN	Human	RFU	Protein	40	431.2	431.2	0.821	PASS	0.846	0.952	0.929	0.95	1.003	0.91	0.995	1.008	0.909	1.05	0.968	0.937	0.759	1.048	0.912
3894-15_2	SL005629	N-acetyl-D-glucosamine kinase	NAGK	Q9UJ70	55577	NAGK	Human	RFU	Protein	1	661.1	661.1	1.112	PASS	1.031	1.119	1.014	1.068	1.102	1.061	1.059	1.149	1.136	1.203	1.17	1.011	1.06	1.248	1.042
3896-5_2	SL004820	Phosphoglycerate mutase 1	Phosphoglycerate mutase 1	P18669	5223	PGAM1	Human	RFU	Protein	40	3539.65	3539.65	1.164	PASS	0.968	0.951	0.97	0.838	0.971	1.026	0.806	1	1.123	1.147	0.901	0.881	0.844	1.039	0.883
3897-61_1	SL011709	Pyridoxal phosphate phosphatase	PLPP	Q96GD0	57026	PDXP	Human	RFU	Protein	40	1670.9	1670.9	0.95	PASS	0.884	0.967	0.828	0.868	0.869	0.891	0.807	0.977	0.952	1.002	0.923	0.803	0.916	1.026	0.906
3898-5_2	SL007266	26S proteasome non-ATPase regulatory subunit 7	PSD7	P51665	5713	PSMD7	Human	RFU	Protein	40	328.6	328.6	0.73	PASS	0.727	0.783	0.793	0.8	0.822	0.789	0.767	0.835	0.834	0.824	0.795	0.854	0.714	0.847	0.818
3902-21_2	SL008808	S-phase kinase-associated protein 1	SKP1	P63208	6500	SKP1	Human	RFU	Protein	40	2887.05	2887.05	1.125	PASS	1.1	1.261	1.224	1.259	1.277	1.264	1.205	1.27	1.235	1.356	1.194	1.162	1.163	1.293	1.265
3903-49_2	SL005372	Sorting nexin-4	Sorting nexin 4	O95219	8723	SNX4	Human	RFU	Protein	40	4193.85	4193.85	0.982	PASS	0.925	0.891	0.787	0.86	0.813	0.796	0.838	0.842	0.894	0.847	0.866	0.804	0.88	0.847	0.86
3905-62_1	SL008143	Ubiquitin-conjugating enzyme E2 N	UBE2N	P61088	7334	UBE2N	Human	RFU	Protein	1	3391.15	3391.15	0.977	PASS	1.108	0.889	0.939	0.835	0.91	0.919	0.924	0.944	0.966	0.924	0.892	0.933	0.869	0.979	1.033
4122-12_2	SL004119	Epithelial discoidin domain-containing receptor 1	discoidin domain receptor 1	Q08345	780	DDR1	Human	RFU	Protein	40	331.1	331.1	0.773	PASS	0.823	0.902	0.968	0.969	0.979	0.926	0.97	1.018	0.916	0.965	0.898	0.958	0.71	0.943	0.924
4123-60_2	SL003171	Fibroblast growth factor 4	FGF-4	P08620	2249	FGF4	Human	RFU	Protein	40	164.65	164.65	0.68	PASS	0.776	0.839	0.921	0.943	1.095	1.015	0.978	1.118	0.975	1.055	0.831	0.997	0.685	0.932	0.927
4124-24_2	SL000451	Heat shock 70 kDa protein 1A	HSP 70	P0DMV8	3303	HSPA1A	Human	RFU	Protein	40	7037.85	7037.85	1.441	FLAG	2.002	1.153	1.223	1.076	1.195	1.234	1.212	1.177	1.375	1.246	1.157	1.582	1.406	1.164	1.345
4125-52_2	SL003680	Advanced glycosylation end product-specific receptor; soluble	sRAGE	Q15109	177	AGER	Human	RFU	Protein	1	745.15	745.15	1.402	FLAG	1.095	1.103	1.324	1.064	0.989	1.818	0.969	1.044	1.023	1.04	1.032	1.298	1.494	1.092	1.773
4126-22_1	SL004511	Bactericidal permeability-increasing protein	BPI	P17213	671	BPI	Human	RFU	Protein	1	787.75	787.75	1.033	PASS	1.285	1.085	1.013	1.042	1.073	1.089	1.037	1.102	1.133	1.092	1.065	1.041	1.026	1.123	1.139
4127-75_1	SL000322	Complement component C6	C6	P13671	729	C6	Human	RFU	Protein	0.005	85327.3	85327.3	1.795	FLAG	1.29	1.611	1.29	1.621	1.044	1.442	1.261	1.127	1.332	1.103	1.866	1.501	2.315	1.378	1.116
4128-27_2	SL003104	C-C motif chemokine 24	Eotaxin-2	O00175	6369	CCL24	Human	RFU	Protein	40	292.95	292.95	0.74	PASS	0.934	0.88	1.045	1	1.064	1.087	0.997	1.098	0.98	1.061	0.892	1.055	0.746	0.951	0.895
4129-72_1	SL000414	Complement factor B	Factor B	P00751	629	CFB	Human	RFU	Protein	0.005	25885.2	25885.2	1.408	FLAG	1.266	1.312	1.191	1.322	1.147	1.17	1.104	1.051	1.238	1.223	1.386	1.189	1.451	1.272	1.13
4130-71_1	SL004340	Fibroblast growth factor 6	FGF-6	P10767	2251	FGF6	Human	RFU	Protein	40	243.9	243.9	0.752	PASS	0.833	0.92	0.963	0.995	1.096	0.978	0.993	1.063	1.027	1.119	0.915	1.024	0.732	0.999	0.936
4131-72_2	SL000426	Fibronectin	Fibronectin	P02751	2335	FN1	Human	RFU	Protein	0.005	22480.9	22480.9	0.919	PASS	0.925	0.818	0.846	0.869	0.861	0.914	0.817	0.72	0.91	0.794	0.892	0.847	0.916	0.78	0.826
4132-27_2	SL000674	Follistatin	FST	P19883	10468	FST	Human	RFU	Protein	40	761.5	761.5	1.107	PASS	1.149	1.212	1.312	1.313	1.341	1.324	1.271	1.316	1.268	1.348	1.236	1.301	1.089	1.261	1.225
4133-54_2	SL004068	Granzyme B	Granzyme B	P10144	3002	GZMB	Human	RFU	Protein	40	207.9	207.9	0.782	PASS	0.951	0.883	1.139	0.988	1.175	1.12	1.058	1.155	1.043	1.132	0.917	1.107	0.765	0.964	1.012
4134-4_2	SL000138	Heparin-binding EGF-like growth factor	HB-EGF	Q99075	1839	HBEGF	Human	RFU	Protein	40	262.25	262.25	1.267	FLAG	1.519	1.64	1.985	1.917	2.176	1.906	1.921	2.157	1.889	2.086	1.695	2.063	1.255	1.84	1.791
4135-84_2	SL000461	Immunoglobulin E	IgE	P01854	3497 50802 3535	IGHE IGK@ IGL@	Human	RFU	Protein	1	6095.65	6095.65	1.081	PASS	1.026	1.11	0.931	1.191	1.067	1.035	0.971	1.012	0.99	1.104	1.218	0.935	1.174	1.054	0.928
4136-40_2	SL004353	Interleukin-17D	IL-17D	Q8TAD2	53342	IL17D	Human	RFU	Protein	40	262.45	262.45	0.627	PASS	0.768	0.746	0.842	0.826	1.041	0.989	0.947	1.027	0.929	0.989	0.748	1.086	0.7	0.794	0.814
4137-57_2	SL004351	Interleukin-25	IL-17E	Q9H293	64806	IL25	Human	RFU	Protein	40	246.75	246.75	0.66	PASS	0.785	0.765	0.792	0.826	0.843	0.714	0.972	0.88	0.787	0.855	0.833	0.798	0.689	0.763	0.757
4138-25_2	SL004346	Interleukin-20	IL-20	Q9NYY1	50604	IL20	Human	RFU	Protein	40	280.1	280.1	0.674	PASS	0.853	0.748	0.933	0.862	0.983	0.997	0.902	1.025	0.849	0.924	0.761	0.973	0.821	0.826	0.817
4139-71_2	SL001943	Interleukin-6 receptor subunit alpha	IL-6 sRa	P08887	3570	IL6R	Human	RFU	Protein	1	14300	14300	0.879	PASS	0.821	0.804	0.825	0.807	0.894	0.881	1.028	0.833	0.973	0.897	0.833	0.709	0.808	0.76	0.882
4140-3_2	SL000483	Interleukin-7	IL-7	P13232	3574	IL7	Human	RFU	Protein	40	149.45	149.45	0.645	FLAG	0.826	0.697	0.886	0.831	0.979	0.992	0.857	0.971	0.883	0.922	0.725	1.149	0.577	0.785	0.811
4141-79_1	SL003183	C-X-C motif chemokine 10	IP-10	P02778	3627	CXCL10	Human	RFU	Protein	40	1667.7	1667.7	1.064	PASS	1.212	1.127	1.132	0.965	1.182	1.251	1.294	1.226	1.25	1.262	1.056	1.098	1.072	1.174	1.233
4143-74_2	SL003186	Lymphotactin	Lymphotactin	P47992	6375	XCL1	Human	RFU	Protein	40	1461	1461	1.196	PASS	1.146	1.172	1.134	1.159	1.174	1.213	1.221	1.19	1.285	1.263	1.251	1.068	1.028	1.212	1.205
4144-13_1	SL000517	C-C motif chemokine 13	MCP-4	Q99616	6357	CCL13	Human	RFU	Protein	40	413.95	413.95	1.053	FLAG	1.157	1.244	1.343	1.337	1.374	1.346	1.308	1.42	1.256	1.448	1.249	1.374	1.028	1.306	1.248
4145-58_2	SL004359	Neurotrophin-3	Neurotrophin-3	P20783	4908	NTF3	Human	RFU	Protein	40	252.3	252.3	0.722	PASS	0.826	0.817	0.845	0.881	0.955	0.887	0.917	0.977	0.876	1.014	0.844	0.879	0.695	0.967	0.856
4146-58_2	SL004360	Neurotrophin-4	Neurotrophin-5	P34130	4909	NTF4	Human	RFU	Protein	40	202.1	202.1	0.645	PASS	0.71	0.805	0.988	0.968	1.129	0.966	1.007	1.104	0.885	1.054	0.795	1.022	0.644	0.9	0.845
4148-49_2	SL002755	Pappalysin-1	PAPP-A	Q13219	5069	PAPPA	Human	RFU	Protein	1	13419.1	13419.1	1.129	PASS	1.143	1.13	1.092	1.051	1.117	1.167	1.189	1.132	1.154	1.176	1.108	1.023	1.046	1.147	1.099
4149-8_2	SL000537	Platelet-derived growth factor subunit B	PDGF-BB	P01127	5155	PDGFB	Human	RFU	Protein	40	25928.5	25928.5	1.223	PASS	1.145	1.091	1.051	1.074	0.928	0.968	1.076	0.959	1.158	1.009	1.1	0.957	1.164	0.994	1.098
4150-75_2	SL000540	Plasmin	Plasmin	P00747	5340	PLG	Human	RFU	Protein	40	611.25	611.25	0.779	PASS	0.766	0.944	1.005	1.046	1.022	1.031	1.003	1.063	0.929	1.061	0.96	0.953	0.791	1.009	0.903
4151-6_2	SL000541	Plasminogen	Plasminogen	P00747	5340	PLG	Human	RFU	Protein	0.005	4381.15	4381.15	1.292	FLAG	1.395	1.232	1.155	1.34	1.255	1.323	1.258	1.13	1.302	1.275	1.508	1.294	1.475	1.122	1.329
4152-58_2	SL000545	Plasma kallikrein	Prekallikrein	P03952	3818	KLKB1	Human	RFU	Protein	0.005	23917.7	23917.7	1.076	PASS	0.984	1.071	0.863	1.1	1.007	0.925	1.1	0.908	1.027	0.983	1.132	0.928	1.149	0.935	0.938
4153-11_2	SL018548	Alpha-1-antichymotrypsin complex	alpha-1-antichymotrypsin complex	P01011		SERPINA3	Human	RFU	Protein	0.005	5814.05	5814.05	1.581	FLAG	1.333	1.593	1.215	1.577	1.39	1.421	1.472	1.253	1.477	1.498	1.808	1.226	1.621	1.346	1.324
4154-57_2	SL000560	P-selectin	P-Selectin	P16109	6403	SELP	Human	RFU	Protein	1	14538.7	14538.7	0.919	PASS	0.955	0.926	1.009	0.945	1.012	1.01	1.01	0.979	1.074	0.983	0.929	0.871	0.884	0.933	1.082
4155-3_2	SL003198	Tenascin	Tenascin	P24821	3371	TNC	Human	RFU	Protein	1	18950.2	18950.2	1.22	PASS	1.153	1.11	1.079	1.11	1.119	1.127	1.036	1.076	1.183	1.072	1.166	1.094	1.205	1.084	1.093
4156-74_1	SL000088	Transforming growth factor beta-2	TGF-b2	P61812	7042	TGFB2	Human	RFU	Protein	40	334.4	334.4	1.004	PASS	1.067	1.113	1.079	1.131	1.18	1.124	1.198	1.141	1.154	1.195	1.139	1.092	0.99	1.145	1.122
4157-2_1	SL000586	Thrombin	Thrombin	P00734	2147	F2	Human	RFU	Protein	40	869.45	869.45	0.771	PASS	0.905	0.832	0.744	0.784	0.759	0.757	0.901	0.75	0.818	0.796	0.82	0.786	0.874	0.79	0.809
4158-54_2	SL000613	Urokinase-type plasminogen activator	uPA	P00749	5328	PLAU	Human	RFU	Protein	40	2122.9	2122.9	1.278	FLAG	1.163	1.057	0.887	0.967	0.966	1.433	1.028	0.994	1.159	1.032	0.972	0.991	1.261	0.925	1.229
4159-130_1	SL000415	Complement factor H	Factor H	P08603	3075	CFH	Human	RFU	Protein	0.005	55743.4	55743.4	1.173	PASS	1.108	1.141	1.01	1.122	1.028	1.019	1.141	0.997	1.101	1.092	1.229	0.973	1.181	1.146	1.032
4160-49_1	SL000124	72 kDa type IV collagenase	MMP-2	P08253	4313	MMP2	Human	RFU	Protein	1	7221.65	7221.65	1.122	PASS	1.06	1.131	1.027	1.142	1.081	1.094	1.122	1.104	1.085	1.147	1.19	0.968	1.055	1.183	1.082
4162-54_2	SL000601	Serotransferrin	Transferrin	P02787	7018	TF	Human	RFU	Protein	0.005	231222	231222	1.043	PASS	0.949	1.074	1.056	1.177	0.847	0.963	0.907	0.803	0.826	0.871	1.073	0.942	1.067	1.144	0.979
4163-5_2	SL002093	Histone H2A.z	Histone H2A.z	P0C0S5	3015	H2AFZ	Human	RFU	Protein	40	951.95	951.95	1.059	PASS	1.14	1.071	1.174	1.1	1.147	1.197	1.117	1.223	1.156	1.33	1.032	1.109	1.024	1.145	1.142
4165-2_1	SL000587	Thyroglobulin	Thyroglobulin	P01266	7038	TG	Human	RFU	Protein	40	294.1	294.1	1.007	FLAG	1.141	1.243	1.549	1.378	1.77	1.626	1.464	1.744	1.37	1.591	1.216	1.758	1.081	1.344	1.446
4179-57_3	SL017611	14-3-3 protein family	2003-03-14	P31946; P62258; P61981; Q04917; P27348; P63104; P31947	7529; 7531; 7532; 7533; 10971; 7534; 2810	YWHAB;YWHAE;YWHAG;YWHAH;YWHAQ;YWHAZ;SFN	Human	RFU	Protein	1	1856	1856	1.103	PASS	1.1	0.843	0.743	0.691	0.727	0.731	0.954	0.741	0.928	0.69	0.748	0.776	0.907	0.652	0.681
4184-43_3	SL008378	Eukaryotic translation initiation factor 4E-binding protein 2	4EBP2	Q13542	1979	EIF4EBP2	Human	RFU	Protein	40	288.65	288.65	0.879	PASS	0.954	1.001	1.092	1.076	1.161	1.091	1.167	1.113	1.068	1.14	1.031	1.104	0.885	1.057	1.073
4187-49_2	SL000247	6-phosphogluconate dehydrogenase; decarboxylating	6-Phosphogluconate dehydrogenase	P52209	5226	PGD	Human	RFU	Protein	1	4404.65	4404.65	1.502	FLAG	1.799	1.46	1.364	1.561	1.533	1.503	1.564	1.632	1.621	1.772	1.586	1.439	1.493	1.68	1.481
4188-1_2	SL003658	Aflatoxin B1 aldehyde reductase member 2	Aflatoxin B1 aldehyde reductase	O43488	8574	AKR7A2	Human	RFU	Protein	1	1485	1485	1.059	PASS	1.242	1.034	0.978	0.986	1.133	1.177	1.139	1.185	1.155	1.172	0.965	0.977	1.058	1.039	0.995
4192-10_2	SL008039	Alcohol dehydrogenase [NADP(+)]	AK1A1	P14550	10327	AKR1A1	Human	RFU	Protein	1	2368.3	2368.3	0.993	PASS	1.026	0.873	0.919	0.817	0.959	0.988	0.99	0.952	0.971	0.952	0.88	0.921	0.94	0.941	0.947
4194-26_3	SL011769	Acidic leucine-rich nuclear phosphoprotein 32 family member B	AN32B	Q92688	10541	ANP32B	Human	RFU	Protein	1	153.3	153.3	0.667	FLAG	0.722	0.766	0.631	0.686	0.508	0.453	0.686	0.414	0.535	0.504	0.782	0.632	0.711	0.639	0.709
4203-50_2	SL004920	Cofilin-1	Cofilin-1	P23528	1072	CFL1	Human	RFU	Protein	40	5536.2	5536.2	1.182	FLAG	1.701	0.969	1.029	0.941	1.123	1.086	1.043	1.2	1.592	0.891	1.004	1.34	1.335	0.925	1.159
4209-60_2	SL004757	Vacuolar protein sorting-associated protein VTA1 homolog	DRG-1	Q9NP79	51534	VTA1	Human	RFU	Protein	40	13048.6	13048.6	1.124	PASS	1.006	1.071	0.768	0.96	0.929	0.863	1.018	0.884	1.016	0.955	1.048	0.771	1.135	0.915	0.943
4212-5_3	SL012188	Epidermal growth factor receptor substrate 15-like 1	EP15R	Q9UBC2	58513	EPS15L1	Human	RFU	Protein	40	382.05	382.05	0.967	PASS	1.129	0.874	0.875	0.854	0.912	1.044	0.922	0.952	1.037	0.949	0.829	1.24	1.115	0.863	1.088
4217-49_3	SL004795	3-hydroxyacyl-CoA dehydrogenase type-2	ERAB	Q99714	3028	HSD17B10	Human	RFU	Protein	40	813.35	813.35	0.677	FLAG	0.764	0.663	0.581	0.721	0.654	0.663	0.606	0.682	0.721	0.679	0.683	0.604	0.72	0.608	0.605
4220-39_2	SL005588	Tyrosine-protein kinase Fer	FER	P16591	2241	FER	Human	RFU	Protein	40	706.2	706.2	1.55	FLAG	1.706	1.347	1.635	1.438	1.289	1.333	1.229	1.405	1.455	1.551	1.398	1.615	1.455	1.54	1.814
4224-7_2	SL007022	Heterogeneous nuclear ribonucleoprotein Q	HNRPQ	O60506	10492	SYNCRIP	Human	RFU	Protein	40	1906	1906	1.434	FLAG	1.516	1.2	1.471	1.042	0.989	1.534	0.875	1.129	1.367	1.065	1.073	1.513	1.417	1.035	1.138
4230-1_2	SL011211	Eukaryotic translation initiation factor 4 gamma 2	IF4G2	P78344	1982	EIF4G2	Human	RFU	Protein	40	1054.9	1054.9	0.672	PASS	0.697	0.732	0.618	0.694	0.693	0.676	0.676	0.729	0.7	0.698	0.693	0.615	0.684	0.657	0.602
4232-19_2	SL003304	Insulin-like growth factor 1 receptor	IGF-I sR	P08069	3480	IGF1R	Human	RFU	Protein	40	7150.7	7150.7	1.235	FLAG	1.704	1.104	1.199	1.06	0.972	1.143	0.961	1.045	1.136	1.024	1.035	1.198	1.224	1.055	1.354
4234-8_2	SL004146	Interleukin-1 receptor-like 1	IL-1 R4	Q01638	9173	IL1RL1	Human	RFU	Protein	1	3945.9	3945.9	1.088	PASS	1.124	1.239	1.233	1.24	1.28	1.255	1.273	1.242	1.337	1.311	1.173	1.121	1.072	1.235	1.309
4237-70_3	SL011770	Leucine carboxyl methyltransferase 1	LCMT1	Q9UIC8	51451	LCMT1	Human	RFU	Protein	40	1386.65	1386.65	0.834	PASS	0.78	0.828	0.718	0.82	0.749	0.797	0.802	0.743	0.749	0.766	0.844	0.764	0.945	0.768	0.713
4238-4_2	SL012168	Protein lin-7 homolog B	LIN7B	Q9HAP6	64130	LIN7B	Human	RFU	Protein	40	344.25	344.25	1.149	FLAG	1.477	1.004	1.249	0.996	1.194	1.484	1.046	1.374	1.25	1.038	0.914	1.579	1.15	0.944	1.321
4240-31_2	SL002650	Pyruvate kinase PKM	M2-PK	P14618	5315	PKM2	Human	RFU	Protein	1	14396.7	14396.7	1.46	FLAG	1.4	1.498	1.505	1.384	1.608	1.585	1.425	1.741	1.759	1.705	1.402	1.513	1.257	1.443	1.627
4245-80_2	SL001999	E3 ubiquitin-protein ligase Mdm2	MDM2	Q00987	4193	MDM2	Human	RFU	Protein	40	168.55	168.55	0.552	FLAG	0.677	0.676	0.762	0.766	0.899	0.839	0.787	0.883	0.843	0.84	0.677	0.814	0.551	0.754	0.709
4246-40_2	SL004154	Neural cell adhesion molecule L1	NCAM-L1	P32004	3897	L1CAM	Human	RFU	Protein	1	495.8	495.8	1.264	PASS	1.143	1.21	1.036	1.238	1.016	1.119	1.017	0.978	1.075	1.14	1.321	1.063	1.343	1.09	1.034
4249-64_2	SL004921	Nucleoside diphosphate kinase B	NDP kinase B	P22392	4831	NME2	Human	RFU	Protein	40	8725.85	8725.85	1.066	PASS	0.924	0.879	0.72	0.852	0.878	0.892	0.679	0.717	0.922	0.934	0.94	0.756	0.876	0.737	0.73
4250-23_3	SL006268	NSFL1 cofactor p47	NSF1C	Q9UNZ2	55968	NSFL1C	Human	RFU	Protein	40	295.85	295.85	0.578	FLAG	0.626	0.634	0.563	0.617	0.618	0.635	0.677	0.622	0.652	0.652	0.634	0.561	0.695	0.599	0.582
4254-6_2	SL011768	NudC domain-containing protein 3	NUDC3	Q8IVD9	23386	NUDCD3	Human	RFU	Protein	40	278.1	278.1	0.842	PASS	0.875	0.866	0.881	0.879	0.984	0.971	1.009	1.022	1.012	1.044	0.899	0.92	0.791	0.914	0.925
4258-15_2	SL008331	Proliferation-associated protein 2G4	PA2G4	Q9UQ80	5036	PA2G4	Human	RFU	Protein	1	1086.25	1086.25	1.348	FLAG	1.185	0.888	1.077	0.885	0.949	1.131	0.848	0.961	1.427	0.913	0.841	0.899	1.157	0.818	1.306
4261-55_2	SL005493	Serum paraoxonase/arylesterase 1	paraoxonase 1	P27169	5444	PON1	Human	RFU	Protein	40	206.25	206.25	0.701	PASS	0.781	0.848	0.903	0.886	1.049	0.953	0.967	0.96	0.909	0.91	0.853	0.896	0.702	0.848	0.909
4267-81_3	SL011772	Pescadillo homolog	PESC	O00541	23481	PES1	Human	RFU	Protein	40	217.5	217.5	0.816	PASS	0.897	0.986	1.022	1.061	1.154	1.071	1.127	1.098	1.046	1.156	1.033	1.034	0.853	1.044	0.985
4271-75_2	SL006705	Prefoldin subunit 5	PFD5	Q99471	5204	PFDN5	Human	RFU	Protein	40	334.7	334.7	0.648	PASS	0.806	0.814	0.895	0.828	0.838	1.063	0.794	0.92	0.787	0.814	0.755	0.922	0.687	0.778	0.852
4272-46_2	SL000539	Glucose-6-phosphate isomerase	PHI	P06744	2821	GPI	Human	RFU	Protein	40	11049.9	11049.9	1.041	PASS	1.033	0.935	0.827	0.844	0.879	0.971	0.856	0.889	0.949	0.913	0.878	0.775	1.346	0.853	0.868
4276-10_2	SL005358	Phosphatidylethanolamine-binding protein 1	prostatic binding protein	P30086	5037	PEBP1	Human	RFU	Protein	1	4120.7	4120.7	0.976	FLAG	1.042	1.059	0.979	0.976	1.067	0.979	1.514	1.016	1.051	1.079	1.136	0.836	0.925	1.065	0.991
4278-14_3	SL004901	Protein disulfide-isomerase	Protein disulfide-isomerase	P07237	5034	P4HB	Human	RFU	Protein	40	252.15	252.15	0.688	PASS	0.776	0.91	0.997	0.955	0.933	0.923	0.889	0.959	0.846	0.895	0.891	0.925	0.694	0.886	0.915
4280-47_2	SL008865	Proteasome subunit alpha type-2	PSA2	P25787	5683	PSMA2	Human	RFU	Protein	40	466.7	466.7	1.026	PASS	1.084	0.973	0.939	0.919	0.89	0.97	0.96	0.967	0.92	0.905	0.96	1.233	0.996	0.938	1.077
4282-3_2	SL005034	GTP-binding nuclear protein Ran	RAN	P62826	5901	RAN	Human	RFU	Protein	1	977.05	977.05	2.482	FLAG	3.745	2.347	2.563	2.524	2.098	2.386	2.226	2.451	2.348	2.227	2.341	2.562	2.566	2.649	2.6
4284-18_3	SL011535	RNA-binding protein 39	RBM39	Q14498	9584	RBM39	Human	RFU	Protein	40	311.45	311.45	0.805	PASS	0.952	0.895	0.982	0.969	1.058	1.054	1.023	1.054	1.04	1.079	0.898	1.244	0.811	0.959	1.005
4292-5_3	SL011202	Alpha-soluble NSF attachment protein	SNAA	P54920	8775	NAPA	Human	RFU	Protein	1	3901	3901	1.14	PASS	1.129	1.129	1.072	1.182	1.132	1.154	1.199	1.189	1.196	1.211	1.18	0.986	1.117	1.19	1.086
4294-16_2	SL006088	Sphingosine kinase 1	Sphingosine kinase 1	Q9NYA1	8877	SPHK1	Human	RFU	Protein	40	3390.7	3390.7	0.833	PASS	1.008	0.743	0.774	0.748	0.783	0.78	0.849	0.809	0.887	0.802	0.732	0.861	0.756	0.748	0.805
4297-62_3	SL005115	Spondin-1	Spondin-1	Q9HCB6	10418	SPON1	Human	RFU	Protein	1	1617.45	1617.45	1.093	FLAG	1.059	1.14	1.004	1.171	1.143	1.119	1.414	1.107	1.18	1.236	1.262	0.933	1.116	1.12	1.059
4301-58_2	SL000057	Thymidine kinase; cytosolic	Thymidine kinase	P04183	7083	TK1	Human	RFU	Protein	40	453	453	1.25	FLAG	1.32	0.94	1.182	0.924	1.098	1.405	0.882	1.155	1.182	0.971	0.853	1.354	1.1	0.879	1.148
4304-18_2	SL006698	Ligand-dependent nuclear receptor corepressor-like protein	transcription factor MLR1; isoform CRA_b	Q8N3X6	254251	LCORL	Human	RFU	Protein	40	217.95	217.95	0.717	PASS	0.803	0.826	1.001	0.928	1.046	1.014	0.995	1.078	0.919	1.028	0.84	1.066	0.752	0.902	0.92
4306-4_2	SL003655	Transketolase	Transketolase	P29401	7086	TKT	Human	RFU	Protein	1	24723	24723	1.086	PASS	1.172	1.039	1.097	1.019	1.11	1.119	0.998	1.125	1.136	1.115	1.006	1.206	1.057	1.058	1.054
4309-59_3	SL004812	Triosephosphate isomerase	Triosephosphate isomerase	P60174	7167	TPI1	Human	RFU	Protein	1	4367.7	4367.7	0.907	PASS	0.988	0.884	0.853	0.855	0.984	0.991	0.848	0.965	0.977	0.973	0.883	0.935	0.957	0.893	0.824
4314-12_2	SL011809	dCTP pyrophosphatase 1	XTP3A	Q9H773	79077	DCTPP1	Human	RFU	Protein	40	8834.35	8834.35	0.783	PASS	0.868	0.793	0.872	0.769	0.74	0.834	0.705	0.83	1.011	0.775	0.747	0.969	0.997	0.786	0.944
4318-12_3	SL004940	Tyrosine-protein phosphatase non-receptor type 6	PTP-1C	P29350	5777	PTPN6	Human	RFU	Protein	40	2574.35	2574.35	0.938	PASS	0.838	0.924	0.794	0.822	0.856	0.865	0.761	0.88	0.981	0.87	0.911	0.84	0.981	0.869	0.965
4322-28_3	SL013489	Protein amnionless	AMNLS	Q9BXJ7	81693	AMN	Human	RFU	Protein	40	125.5	125.5	0.513	FLAG	0.69	0.679	0.863	0.808	1.085	0.878	0.895	1.013	0.824	0.915	0.688	1.044	0.551	0.76	0.799
4324-33_2	SL008516	Cystatin-SA	CYTT	P09228	1470	CST2	Human	RFU	Protein	40	25781.5	25781.5	0.873	PASS	0.952	0.886	0.911	0.835	0.899	0.892	1.08	0.817	0.927	0.84	0.909	0.774	0.972	0.775	0.856
4328-2_2	SL013490	Brother of CDO	BOC	Q9BWV1	91653	BOC	Human	RFU	Protein	40	1423.4	1423.4	1.09	PASS	1.038	1.122	1.007	1.021	1.042	1.15	1.146	1.134	1.133	1.173	1.054	1.004	1.179	1.079	1.076
4332-6_2	SL013488	C-type lectin domain family 1 member B	CLC1B	Q9P126	51266	CLEC1B	Human	RFU	Protein	40	11305.5	11305.5	0.935	PASS	0.884	0.864	0.803	0.837	0.864	0.817	0.927	0.888	0.939	0.92	0.819	0.768	0.83	0.852	0.848
4336-2_1	SL000572	Serum amyloid A-1 protein	SAA	P0DJI8	6288	SAA1	Human	RFU	Protein	1	3800.4	3800.4	1.372	FLAG	1.519	1.272	1.21	1.279	1.609	1.342	1.462	1.124	1.405	1.214	1.204	1.3	1.215	1.042	1.23
4337-49_2	SL000051	C-reactive protein	CRP	P02741	1401	CRP	Human	RFU	Protein	1	58293	58293	1.953	FLAG	1.796	1.876	1.88	1.607	1.608	1.75	1.679	1.641	1.804	1.533	1.754	1.602	1.766	1.753	1.913
4342-10_3	SL002922	Intercellular adhesion molecule 1	sICAM-1	P05362	3383	ICAM1	Human	RFU	Protein	1	3788.1	3788.1	1.146	PASS	1.086	1.155	1.133	1.09	1.007	1.069	1.131	1.069	1.024	1.114	1.217	0.993	1.122	1.177	1.103
4355-13_1	SL007752	Death-associated protein kinase 2	DAPK2	Q9UIK4	23604	DAPK2	Human	RFU	Protein	40	1800	1800	1.205	PASS	1.182	1.117	1.08	1.038	1.013	1.068	1.034	1.053	1.098	1.037	1.067	1.12	1.214	1.056	1.078
4359-87_1	SL013570	Dual specificity tyrosine-phosphorylation-regulated kinase 3	DYRK3	O43781	8444	DYRK3	Human	RFU	Protein	40	1909.85	1909.85	1.382	FLAG	1.404	1.313	1.32	1.262	1.069	1.232	1.133	1.141	1.158	1.183	1.329	1.18	1.455	1.259	1.23
4374-45_2	SL003869	Growth/differentiation factor 15	MIC-1	Q99988	9518	GDF15	Human	RFU	Protein	1	636.6	636.6	1.013	PASS	1.028	1.073	1.056	1.023	1.082	1.115	1.082	1.058	1.079	1.092	1.017	0.977	0.96	1.105	1.097
4389-2_1	SL007003	Desert hedgehog protein N-product	DHH	O43323	50846	DHH	Human	RFU	Protein	40	787.65	787.65	0.889	PASS	0.867	0.938	0.906	0.933	0.933	0.909	0.901	0.96	0.91	0.983	0.938	0.878	0.844	0.973	0.939
4392-54_2	SL005161	Fibroblast growth factor 12	FGF-12	P61328	2257	FGF12	Human	RFU	Protein	40	165.1	165.1	0.732	PASS	0.785	0.823	0.923	0.835	0.973	0.947	0.926	1.022	0.839	0.924	0.8	0.936	0.703	0.876	0.861
4393-3_1	SL004334	Fibroblast growth factor 16	FGF-16	O43320	8823	FGF16	Human	RFU	Protein	40	1168.2	1168.2	1.123	PASS	0.975	1.059	0.95	0.995	0.908	1.005	0.871	0.988	1.029	1.054	1.028	0.945	1.097	1.055	0.99
4394-71_2	SL014308	Fibroblast growth factor 8 isoform A	FGF-8A	P55075	2253	FGF8	Human	RFU	Protein	40	252.65	252.65	0.947	PASS	1.026	0.936	0.977	0.963	1.116	1.087	0.989	1.09	1.064	1.061	0.951	1.064	1.051	1.033	1.128
4396-54_1	SL004348	Interferon lambda-1	IFN-lambda 1	Q8IU54	282618	IFNL1	Human	RFU	Protein	40	230.15	230.15	1.08	PASS	1.132	1.137	1.137	1.065	1.142	1.11	1.166	1.143	1.07	1.154	1.085	1.089	1.027	1.191	1.155
4397-26_2	SL004349	Interferon lambda-2	IFN-lambda 2	Q8IZJ0	282616	IFNL2	Human	RFU	Protein	40	165.65	165.65	0.652	PASS	0.737	0.782	0.892	0.89	0.988	0.876	0.918	0.973	0.844	0.97	0.79	0.948	0.619	0.864	0.819
4407-10_1	SL005202	Hepatocyte growth factor-like protein	MSP	P26927	4485	MST1	Human	RFU	Protein	0.005	7291.4	7291.4	1.726	FLAG	1.77	1.791	1.535	1.643	1.839	1.737	1.838	1.556	1.738	1.745	1.781	1.521	1.712	1.527	1.617
4413-3_2	SL001888	Antileukoproteinase	SLPI	P03973	6590	SLPI	Human	RFU	Protein	1	30319	30319	1.085	PASS	1.037	0.966	0.978	0.934	0.972	0.967	1.055	0.887	1.071	0.948	1.003	0.862	0.96	0.959	0.984
4414-69_2	SL004484	Pulmonary surfactant-associated protein D	SP-D	P35247	6441	SFTPD	Human	RFU	Protein	1	3435.8	3435.8	1.331	FLAG	1.107	1.306	1.12	1.34	1.293	1.312	1.072	1.332	1.367	1.485	1.369	1.17	1.364	1.336	1.264
4420-7_2	SL009988	Disintegrin and metalloproteinase domain-containing protein 12	ADAM12	O43184	8038	ADAM12	Human	RFU	Protein	40	789.55	789.55	0.987	PASS	0.907	1.058	0.983	1.07	0.992	0.969	1.079	0.996	0.996	0.997	1.076	1.026	0.934	1.012	1.029
4423-77_2	SL003674	Bcl-2-like protein 1	BCL2-like 1 protein	Q07817	598	BCL2L1	Human	RFU	Protein	40	862.7	862.7	0.762	PASS	0.811	0.823	0.829	0.822	0.83	0.926	0.804	0.905	0.874	0.856	0.782	0.809	0.784	0.786	0.763
4428-1_2	SL013988	Carbohydrate sulfotransferase 2	CHST2	Q9Y4C5	9435	CHST2	Human	RFU	Protein	40	282.25	282.25	0.818	PASS	0.888	0.942	0.984	1.031	1.118	1.055	1.045	1.103	0.963	1.117	0.929	1.007	0.764	0.981	0.956
4429-51_2	SL014130	Carbohydrate sulfotransferase 6	CHST6	Q9GZX3	4166	CHST6	Human	RFU	Protein	40	318.35	318.35	0.828	PASS	0.773	0.964	0.934	0.98	0.987	0.952	0.932	1.021	0.855	0.966	0.946	0.9	0.746	0.997	0.91
4430-44_3	SL006713	Collectin-11	Collectin Kidney 1	Q9BWP8	78989	COLEC11	Human	RFU	Protein	1	12950.5	12950.5	1.791	FLAG	1.607	1.728	1.592	1.71	1.526	1.66	1.363	1.665	1.768	1.745	1.746	1.764	1.944	1.779	1.81
4435-66_2	SL009045	Ectonucleotide pyrophosphatase/phosphodiesterase family member 7	ENPP7	Q6UWV6	339221	ENPP7	Human	RFU	Protein	40	8225	8225	0.97	PASS	1.073	0.955	1.049	0.9	0.957	1.004	1.181	0.978	1.068	1.062	1.044	0.922	0.946	1.042	1.046
4436-1_2	SL014093	Ectonucleoside triphosphate diphosphohydrolase 3	ENTP3	O75355	956	ENTPD3	Human	RFU	Protein	40	923.1	923.1	1.087	PASS	1.058	1.157	1.123	1.153	1.071	1.231	1.062	1.165	1.142	1.199	1.164	1.063	1.132	1.189	1.032
4437-56_3	SL014028	Ectonucleoside triphosphate diphosphohydrolase 5	ENTP5	O75356	957	ENTPD5	Human	RFU	Protein	1	4120.6	4120.6	0.888	PASS	0.98	0.846	0.71	0.746	0.794	0.804	0.872	0.732	0.858	0.752	0.832	0.685	0.854	0.726	0.745
4440-15_2	SL014088	Fc receptor-like protein 3	FCRL3	Q96P31	115352	FCRL3	Human	RFU	Protein	40	346.85	346.85	0.895	PASS	1.012	0.869	1.097	0.887	0.991	1.064	0.899	1.073	1.008	0.945	0.793	1.122	0.879	0.865	0.925
4449-67_3	SL007024	Gremlin-1	GREM1	O60565	26585	GREM1	Human	RFU	Protein	40	355.7	355.7	0.769	PASS	0.938	0.903	0.991	0.993	1.165	1.102	1.068	1.142	0.987	1.091	0.861	1.077	0.846	0.988	1
4450-26_2	SL009791	Heterogeneous nuclear ribonucleoprotein A/B	hnRNP A/B	Q99729	3182	HNRNPAB	Human	RFU	Protein	1	1066.45	1066.45	1.208	PASS	1.351	1.097	1.012	1.063	0.998	1.149	1.062	1.06	1.082	1.069	1.091	1.101	1.374	1.041	1.098
4452-9_2	SL014096	Leucine-rich repeat transmembrane neuronal protein 1	LRRT1	Q86UE6	347730	LRRTM1	Human	RFU	Protein	40	108.2	108.2	0.556	FLAG	0.849	0.682	0.875	0.82	0.981	1.042	0.863	1.032	0.809	0.918	0.678	0.998	0.674	0.781	0.905
4453-83_3	SL014108	Leucine-rich repeat transmembrane neuronal protein 3	LRRT3	Q86VH5	347731	LRRTM3	Human	RFU	Protein	40	266.6	266.6	0.7	PASS	0.786	0.838	0.915	0.96	1.067	0.964	0.984	1.008	0.972	1.026	0.87	0.927	0.72	0.916	0.861
4455-89_2	SL006523	Lactadherin	MFGM	Q08431	4240	MFGE8	Human	RFU	Protein	40	1072.15	1072.15	0.92	PASS	0.987	1.04	0.759	1.005	0.972	0.979	1.135	0.893	0.937	0.991	1.056	0.89	1.038	0.872	0.827
4459-68_2	SL014069	Proprotein convertase subtilisin/kexin type 7	PCSK7	Q16549	9159	PCSK7	Human	RFU	Protein	40	1508.95	1508.95	0.769	PASS	0.796	0.785	0.755	0.746	0.776	0.824	0.862	0.867	0.823	0.866	0.793	0.726	0.879	0.818	0.825
4460-8_2	SL006998	3-phosphoinositide-dependent protein kinase 1	PDPK1	O15530	5170	PDPK1	Human	RFU	Protein	40	548.7	548.7	0.57	FLAG	0.57	0.562	0.586	0.564	0.572	0.572	0.605	0.608	0.604	0.619	0.545	0.512	0.568	0.572	0.617
4464-10_2	SL001753	Sialoadhesin	Sialoadhesin	Q9BZZ2	6614	SIGLEC1	Human	RFU	Protein	40	124.3	124.3	0.773	PASS	1.053	0.783	0.86	0.822	0.965	0.9	0.972	0.93	0.891	0.875	0.813	0.88	0.753	0.811	0.895
4467-49_2	SL005488	SPARC-like protein 1	SPARCL1	Q14515	8404	SPARCL1	Human	RFU	Protein	1	11422	11422	1.595	FLAG	1.969	1.468	1.338	1.5	1.384	1.706	1.173	1.351	1.396	1.337	1.555	1.369	1.891	1.31	1.334
4468-21_2	SL014029	Sphingosine kinase 2	SPHK2	Q9NRA0	56848	SPHK2	Human	RFU	Protein	40	425.85	425.85	0.802	PASS	1.018	0.875	1.002	0.926	0.987	1.047	0.92	1.072	0.915	0.992	0.851	1.012	0.813	0.9	0.932
4469-78_2	SL007502	Carbohydrate sulfotransferase 15	ST4S6	Q7LFX5	51363	CHST15	Human	RFU	Protein	1	4244.05	4244.05	1.001	PASS	1.013	0.985	0.998	0.99	1.069	1.093	1.039	1.112	1.145	1.159	0.991	1.083	0.976	1.122	1.029
4471-50_2	SL008945	Protein-glutamine gamma-glutamyltransferase E	TGM3	Q08188	7053	TGM3	Human	RFU	Protein	40	241.95	241.95	0.64	FLAG	0.73	0.664	0.639	0.706	0.595	0.498	0.792	0.631	0.774	0.622	0.669	0.814	0.8	0.573	0.754
4472-5_2	SL004908	Tropomyosin beta chain	Tropomyosin 2	P07951	7169	TPM2	Human	RFU	Protein	40	1946.1	1946.1	2.026	FLAG	2.025	1.76	1.992	1.303	1.202	1.506	1.124	1.891	1.515	1.275	1.406	1.94	1.969	1.584	1.35
4474-19_2	SL004070	Ubiquitin	Ubiquitin	P62979	6233	RPS27A	Human	RFU	Protein	0.005	986.3	986.3	0.828	PASS	0.72	0.76	0.961	0.965	1.016	1.062	1.043	0.952	1.211	0.82	0.975	1.016	1.023	0.936	1.07
4476-22_2	SL010519	Tyrosine-protein kinase ZAP-70	ZAP70	P43403	7535	ZAP70	Human	RFU	Protein	40	12071.3	12071.3	1.85	FLAG	1.835	1.815	1.717	1.67	1.482	1.978	1.263	1.452	1.996	1.526	1.725	1.874	2.219	1.541	1.572
4479-14_2	SL000308	Plasma protease C1 inhibitor	C1-Esterase Inhibitor	P05155	710	SERPING1	Human	RFU	Protein	1	7509.6	7509.6	1.032	PASS	0.943	0.922	0.874	0.891	0.928	0.951	0.908	0.843	0.949	0.898	0.958	0.849	0.983	0.902	0.883
4480-59_2	SL000314	Complement C3b	C3b	P01024	718	C3	Human	RFU	Protein	40	26922.1	26922.1	1.656	FLAG	1.34	1.556	1.517	1.725	1.267	1.255	1.004	1.118	1.281	1.403	1.176	1.278	1.333	1.326	1.121
4481-34_2	SL000316	Complement C4	C4	P0C0L4; P0C0L5	720 721	C4A C4B	Human	RFU	Protein	0.005	117651	117651	1	PASS	0.907	0.994	1.037	1.092	0.906	0.915	0.847	0.798	0.881	0.877	1.041	0.894	1.034	0.991	1.121
4482-66_2	SL000321	Complement C5b-C6 complex	C5b; 6 Complex	P01031;P13671	727 729	C5 C6	Human	RFU	Protein	0.005	478.1	478.1	0.661	FLAG	0.748	0.606	0.568	0.629	0.62	0.636	0.644	0.576	0.656	0.639	0.677	0.629	0.719	0.588	0.598
4487-1_1	SL001691	Fibroblast growth factor 7	FGF7	P21781	2252	FGF7	Human	RFU	Protein	40	1139.4	1139.4	0.891	PASS	0.822	0.915	0.878	0.907	0.863	0.928	0.876	0.931	0.918	0.962	0.898	0.831	0.889	0.955	0.9
4490-65_2	SL005187	Interleukin-3 receptor subunit alpha	IL-3 Ra	P26951	3563	IL3RA	Human	RFU	Protein	40	815.45	815.45	1.012	PASS	1.025	1.061	1.04	1.069	1.109	1.057	1.105	1.089	1.12	1.187	1.084	1.027	0.94	1.204	1.079
4491-4_2	SL005188	Interleukin-5 receptor subunit alpha	IL-5 Ra	Q01344	3568	IL5RA	Human	RFU	Protein	40	1576	1576	0.642	PASS	0.681	0.661	0.708	0.659	0.715	0.763	0.725	0.721	0.73	0.715	0.631	0.679	0.649	0.645	0.69
4493-92_1	SL000470	Interleukin-11	IL-11	P20809	3589	IL11	Human	RFU	Protein	40	247.15	247.15	0.913	PASS	1.075	1.001	1.079	1.027	1.158	1.129	1.044	1.168	1.038	1.095	0.989	1.2	0.878	1.019	1.001
4495-33_2	SL017189	Kininogen-1	Kininogen; HMW	P01042	3827	KNG1	Human	RFU	Protein	0.005	28915.2	28915.2	1.146	PASS	1.028	1.045	1.035	1.245	1.229	1.147	0.982	1.023	1.188	1.173	1.225	1.064	1.146	0.991	1.124
4496-60_2	SL000522	Macrophage metalloelastase	MMP-12	P39900	4321	MMP12	Human	RFU	Protein	40	873.85	873.85	0.902	PASS	0.912	0.949	0.893	0.937	0.952	0.969	0.97	0.988	0.997	1.024	0.963	0.906	0.882	0.998	0.976
4498-62_2	SL003764	Neural cell adhesion molecule 1; 120 kDa isoform	NCAM-120	P13591	4684	NCAM1	Human	RFU	Protein	1	11541.5	11541.5	1.195	PASS	1.121	1.146	1.027	1.102	1.132	1.133	1.139	1.093	1.154	1.144	1.194	1.038	1.097	1.125	1.11
4499-21_1	SL000535	Platelet-derived growth factor subunit A	PDGF-AA	P04085	5154	PDGFA	Human	RFU	Protein	40	12892.6	12892.6	1.394	FLAG	1.414	1.324	1.398	1.276	1.068	1.165	1.048	1.118	1.216	1.113	1.278	1.275	1.316	1.306	1.509
4500-50_2	SL004363	Stem cell growth factor-alpha	SCGF-alpha	Q9Y240	6320	CLEC11A	Human	RFU	Protein	1	2257.6	2257.6	1.17	PASS	1.095	1.004	0.921	0.919	0.991	1.008	0.938	0.922	1.046	0.992	1.01	0.95	1.088	0.963	0.965
4533-76_2	SL012740	A disintegrin and metalloproteinase with thrombospondin motifs 15	ATS15	Q8TE58	170689	ADAMTS15	Human	RFU	Protein	40	310.6	310.6	0.753	PASS	0.837	0.905	0.956	0.975	1.091	0.991	1.071	1.042	0.984	1.063	0.941	1.025	0.726	0.97	0.926
4534-10_2	SL012822	Brain-specific serine protease 4	BSSP4	Q9GZN4	64063	PRSS22	Human	RFU	Protein	40	1702.4	1702.4	0.968	PASS	1.004	0.872	0.931	0.864	0.91	0.951	0.928	0.966	1.044	0.946	0.861	1.167	1.159	0.912	1.228
4535-50_2	SL008644	ADP-ribosyl cyclase/cyclic ADP-ribose hydrolase 2	BST1	Q10588	683	BST1	Human	RFU	Protein	40	9882.1	9882.1	0.618	FLAG	0.624	0.675	0.486	0.569	0.6	0.55	0.689	0.565	0.607	0.564	0.67	0.462	0.696	0.527	0.597
4540-11_2	SL009768	Chromobox protein homolog 5	CBX5	P45973	23468	CBX5	Human	RFU	Protein	40	362.15	362.15	0.986	PASS	0.936	1.205	1.18	1.19	1.242	1.294	1.19	1.225	1.098	1.195	1.185	1.151	1.02	1.194	1.022
4541-49_2	SL014092	Cell adhesion molecule-related/down-regulated by oncogenes	CDON	Q4KMG0	50937	CDON	Human	RFU	Protein	1	6954.25	6954.25	0.92	PASS	0.907	0.879	0.917	0.846	1	0.953	0.93	0.942	1.014	0.975	0.888	0.882	0.837	0.974	0.991
4542-24_2	SL001896	Clusterin	Clusterin	P10909	1191	CLU	Human	RFU	Protein	0.005	1017.7	1017.7	2.218	FLAG	2.329	1.786	1.21	1.663	1.405	1.617	1.475	1.179	1.825	1.383	2.055	1.463	3.137	1.254	1.319
4543-65_2	SL014048	Collagen alpha-1(XXIII) chain	CONA1	Q86Y22	91522	COL23A1	Human	RFU	Protein	40	326.35	326.35	0.705	PASS	0.858	0.7	0.691	0.696	0.776	0.765	0.787	0.754	0.824	0.76	0.685	0.834	0.719	0.677	0.727
4544-4_3	SL004708	Connective tissue-activating peptide III	CTAP-III	P02775	5473	PPBP	Human	RFU	Protein	0.005	22807	22807	1.669	FLAG	1.575	1.55	1.685	1.519	1.629	1.689	1.613	1.686	1.687	1.71	1.523	1.439	1.473	1.593	1.692
4545-53_3	SL006197	Mitochondrial import inner membrane translocase subunit TIM14	DnaJ homolog	Q96DA6	131118	DNAJC19	Human	RFU	Protein	40	502.55	502.55	0.793	PASS	0.912	0.919	1.086	1	1.106	1.024	1.033	1.097	1.021	1.048	0.926	1.097	0.755	0.956	1.006
4546-27_3	SL008822	Adhesion G protein-coupled receptor E2	EMR2	Q9UHX3	30817	ADGRE2	Human	RFU	Protein	1	775	775	1.857	FLAG	1.636	1.918	1.675	1.598	1.754	1.782	1.813	1.657	1.732	1.74	1.84	1.495	1.568	1.736	1.688
4547-59_2	SL014071	Leucine-rich repeat transmembrane protein FLRT1	FLRT1	Q9NZU1	23769	FLRT1	Human	RFU	Protein	40	600.35	600.35	1.131	FLAG	2.002	0.914	1.033	0.926	1.021	1.128	0.974	1.243	1.094	1.014	0.902	1.219	1.04	0.966	1.11
4548-4_2	SL005575	Galactoside 3(4)-L-fucosyltransferase	Fucosyltransferase 3	P21217	2525	FUT3	Human	RFU	Protein	40	402	402	0.858	PASS	0.951	0.902	0.87	0.879	0.965	0.931	0.938	0.951	0.875	0.903	0.87	0.887	0.827	0.856	0.853
4549-78_2	SL014008	Alpha-(1;3)-fucosyltransferase 5	FUT5	Q11128	2527	FUT5	Human	RFU	Protein	40	6083.35	6083.35	1.058	PASS	0.996	1.034	0.904	0.92	0.943	1.01	1.061	0.989	1.048	1.037	0.993	0.889	1.026	1.036	0.986
4551-72_3	SL014094	Adhesion G-protein coupled receptor G5	GP114	Q8IZF4	221188	ADGRG5	Human	RFU	Protein	40	556.15	556.15	0.833	PASS	1.013	0.921	1.041	1.003	0.98	0.965	0.913	1.015	0.869	0.942	0.917	1.104	0.913	0.936	0.999
4553-65_3	SL014009	Hepatoma-derived growth factor-related protein 2	HDGR2	Q7Z4V5	84717	HDGFRP2	Human	RFU	Protein	40	581.15	581.15	0.892	PASS	0.936	1.039	1.108	1.048	1.069	1.077	1.021	1.056	1.008	1.06	1.025	1.117	0.805	1.059	0.989
4556-10_2	SL013548	Interleukin-34	IL-34	Q6ZMJ4	146433	IL34	Human	RFU	Protein	40	656.2	656.2	1.065	FLAG	1.02	1.021	1.381	0.95	0.98	1.526	0.862	1.195	1.066	0.971	0.906	1.418	1.088	0.941	1.089
4557-61_2	SL014111	Kin of IRRE-like protein 3	KIRR3	Q8IZU9	84623	KIRREL3	Human	RFU	Protein	40	256.15	256.15	0.708	PASS	0.894	0.764	0.895	0.84	0.96	0.931	0.911	0.989	0.88	0.886	0.776	1.08	0.628	0.804	0.868
4559-64_2	SL013969	Kynureninase	KYNU	Q16719	8942	KYNU	Human	RFU	Protein	40	610.35	610.35	0.757	PASS	0.828	0.792	0.743	0.761	0.833	0.874	0.81	0.865	0.84	0.868	0.781	0.818	0.845	0.773	0.772
4561-65_2	SL004299	Baculoviral IAP repeat-containing protein 7 Isoform beta	Livin B	Q96CA5	79444	BIRC7	Human	RFU	Protein	40	107.7	107.7	0.787	PASS	0.909	0.782	0.903	0.842	1.037	1.017	0.94	1.025	0.932	0.962	0.819	1.174	0.625	0.886	0.909
4562-1_2	SL012457	Neurexophilin-1	NXPH1	P58417	30010	NXPH1	Human	RFU	Protein	1	8448	8448	1.098	PASS	0.909	1.002	0.839	0.898	0.849	0.979	1.01	0.816	1.05	0.878	1.031	0.835	1.076	0.804	0.805
4563-61_2	SL012108	1-phosphatidylinositol 4;5-bisphosphate phosphodiesterase gamma-1	PLCG1	P19174	5335	PLCG1	Human	RFU	Protein	40	439.75	439.75	0.646	PASS	0.776	0.691	0.754	0.708	0.694	0.746	0.642	0.718	0.73	0.676	0.667	0.908	0.713	0.694	0.773
4564-2_2	SL006406	Plexin-C1	PLXC1	O60486	10154	PLXNC1	Human	RFU	Protein	1	688.95	688.95	1.006	PASS	0.963	1.021	0.916	1.032	0.985	0.971	0.977	1	1.033	1.032	1.047	0.917	0.996	1.027	0.957
4566-24_3	SL013989	R-spondin-2	RSPO2	Q6UXX9	340419	RSPO2	Human	RFU	Protein	40	306.2	306.2	0.739	PASS	0.784	0.906	1.033	0.994	1.065	0.991	0.981	1.074	0.933	1.065	0.902	1	0.714	0.989	0.912
4567-82_2	SL014468	SH2 domain-containing protein 1A	SH21A	O60880	4068	SH2D1A	Human	RFU	Protein	40	6330.6	6330.6	2.907	FLAG	3.063	2.76	3.041	2.161	1.197	1.116	1.757	2.129	2.003	1.79	2.91	1.624	3.817	2.611	3.056
4568-17_2	SL014070	SLIT and NTRK-like protein 5	SLIK5	O94991	26050	SLITRK5	Human	RFU	Protein	40	2084.1	2084.1	0.659	FLAG	0.623	0.655	0.603	0.61	0.647	0.647	0.729	0.656	0.668	0.704	0.665	0.558	0.683	0.645	0.628
4569-52_2	SL014091	VPS10 domain-containing receptor SorCS2	SORC2	Q96PQ0	57537	SORCS2	Human	RFU	Protein	40	578.05	578.05	1.123	FLAG	1.674	1.189	1.198	1.132	1.182	1.216	1.191	1.228	1.201	1.236	1.198	1.323	1.211	1.178	1.289
4588-1_2	SL011499	Pancreatic hormone	PH	P01298	5539	PPY	Human	RFU	Protein	40	3712.7	3712.7	0.878	PASS	0.89	0.903	0.864	0.812	0.805	0.811	0.953	0.821	0.863	0.844	0.832	0.771	0.818	0.839	0.95
4673-13_2	SL000087	Interleukin-6	IL-6	P05231	3569	IL6	Human	RFU	Protein	40	290.75	290.75	0.791	PASS	0.857	0.859	0.968	0.982	1.137	1.064	1.001	1.05	0.995	1.096	0.913	0.977	0.765	0.995	0.944
4693-72_2	SL008085	3-hydroxyisobutyrate dehydrogenase; mitochondrial	3HIDH	P31937	11112	HIBADH	Human	RFU	Protein	40	853.7	853.7	0.908	PASS	0.902	0.918	0.977	1.042	1.094	1.017	1.061	1.035	1.013	1.068	0.986	1.024	0.857	0.992	1.011
4697-59_2	SL001726	Granulocyte-macrophage colony-stimulating factor	GM-CSF	P04141	1437	CSF2	Human	RFU	Protein	40	370.95	370.95	0.909	PASS	0.919	0.963	0.991	1.007	0.985	0.932	1.069	0.961	1.044	0.996	0.984	0.982	0.912	0.965	1.058
4703-87_2	SL000597	Lymphotoxin-alpha	TNF-b	P01374	4049	LTA	Human	RFU	Protein	40	376.2	376.2	0.579	FLAG	0.613	0.726	0.782	0.802	0.95	0.872	0.892	0.957	0.81	0.912	0.725	0.831	0.551	0.772	0.74
4706-17_2	SL010830	Protein 4.1	41	P11171	2035	EPB41	Human	RFU	Protein	1	6137.45	6137.45	1.193	PASS	1.133	1.159	1.131	1.057	1.172	1.246	0.943	1.247	1.371	1.229	1.045	1.091	1.206	1.198	1.001
4708-3_2	SL004253	Estradiol 17-beta-dehydrogenase 1	17-beta-HSD 1	P14061	3292	HSD17B1	Human	RFU	Protein	40	1663.55	1663.55	2.786	FLAG	2.566	2.556	2.988	2.735	2.733	2.718	2.66	2.661	2.643	2.731	2.675	3.328	3.014	2.584	2.776
4712-28_2	SL005361	Apolipoprotein D	Apo D	P05090	347	APOD	Human	RFU	Protein	1	4455.55	4455.55	1.129	FLAG	1.359	1.146	1.226	0.883	0.745	1.309	0.87	1.037	0.993	0.898	1.104	1.243	1.457	0.968	0.86
4717-55_2	SL000479	Interleukin-3	IL-3	P08700	3562	IL3	Human	RFU	Protein	40	1226.8	1226.8	1.219	PASS	1.21	1.166	1.176	1.174	1.097	1.174	1.097	1.093	1.119	1.138	1.229	1.144	1.331	1.211	1.184
4718-5_2	SL007869	Peptidyl-prolyl cis-trans isomerase B	PPIB	P23284	5479	PPIB	Human	RFU	Protein	40	2786.5	2786.5	0.878	PASS	0.781	0.963	0.844	0.985	0.884	0.869	0.854	0.867	0.828	0.958	0.994	0.888	0.875	0.958	0.843
4719-58_2	SL003524	Protein disulfide-isomerase A3	Protein disulfide isomerase A3	P30101	2923	PDIA3	Human	RFU	Protein	1	2297.4	2297.4	0.978	PASS	0.997	0.885	0.845	0.882	0.895	0.895	0.83	0.814	0.887	0.816	0.955	0.88	1.037	0.832	0.771
4721-54_2	SL006119	Trefoil factor 3	TFF3	Q07654	7033	TFF3	Human	RFU	Protein	1	29196.1	29196.1	0.995	PASS	0.995	0.98	1.019	0.967	1.032	1.035	1.092	0.972	1	1.007	0.993	0.927	0.946	1.062	1.066
4763-31_3	SL004742	Afamin	Afamin	P43652	173	AFM	Human	RFU	Protein	0.005	29513.1	29513.1	1.388	PASS	1.301	1.236	1.178	1.198	1.305	1.381	1.173	1.257	1.353	1.258	1.269	1.174	1.349	1.225	1.129
4769-10_3	SL008590	Olfactomedin-4	Olfactomedin-4	Q6UX06	10562	OLFM4	Human	RFU	Protein	40	164.4	164.4	0.667	PASS	0.756	0.816	0.984	0.949	1.053	0.924	0.934	1.04	0.897	0.981	0.847	1.044	0.665	0.963	0.898
4771-10_3	SL012754	Acid sphingomyelinase-like phosphodiesterase 3a	ASM3A	Q92484	10924	SMPDL3A	Human	RFU	Protein	1	3358.55	3358.55	0.835	PASS	0.806	0.924	0.896	1.071	0.943	0.87	0.87	0.915	0.879	0.893	1.027	0.968	1.011	0.953	0.897
4774-62_3	SL016129	Protein FAM107B	FAM107B	Q9H098	83641	FAM107B	Human	RFU	Protein	40	1901.05	1901.05	0.83	PASS	0.92	0.91	0.914	0.917	0.988	0.94	1.049	0.969	0.982	1.02	0.878	0.915	0.848	0.911	0.919
4775-34_3	SL005572	Gelsolin	Gelsolin	P06396	2934	GSN	Human	RFU	Protein	0.005	833.55	833.55	1.234	FLAG	1.404	1.084	0.999	1.035	1.145	1.206	1.081	1.089	1.187	1.199	1.14	1.177	1.171	1.183	1.285
4785-30_3	SL000347	Corticosteroid-binding globulin	CBG	P08185	866	SERPINA6	Human	RFU	Protein	40	705.65	705.65	1.274	PASS	1.267	1.16	1.28	1.216	1.287	1.268	1.207	1.267	1.26	1.27	1.183	1.308	1.292	1.2	1.233
4786-58_3	SL007871	UMP-CMP kinase	Cytidylate kinase	P30085	51727	CMPK1	Human	RFU	Protein	40	4745.65	4745.65	1.34	FLAG	1.258	1.273	1.202	1.241	1.083	1.261	1.083	1.137	1.211	1.214	1.304	1.235	1.409	1.314	1.182
4792-51_2	SL016148	gp41 C34 peptide; HIV	C34 gp41 HIV Fragment	Q70626		Human-virus	isolate LW123	RFU	Protein	40	1072.4	1072.4	1.164	PASS	1.224	1.065	0.935	1.086	0.959	0.961	1.159	0.872	1.037	0.972	1.18	1.025	1.158	0.948	1.163
4801-13_3	SL007153	Lactoperoxidase	PERL	P22079	4025	LPO	Human	RFU	Protein	40	862.3	862.3	0.917	PASS	0.869	0.937	0.897	0.904	0.911	0.953	0.983	0.955	0.984	0.97	0.945	0.887	0.84	0.953	0.898
4807-13_3	SL008072	Collagen alpha-1(VIII) chain	CO8A1	P27658	1295	COL8A1	Human	RFU	Protein	40	1823.8	1823.8	0.983	PASS	0.955	0.985	0.899	0.996	0.934	0.892	0.95	0.88	0.919	0.947	1.04	0.848	0.969	0.959	0.959
4811-33_3	SL004739	Inter-alpha-trypsin inhibitor heavy chain H4	ITI heavy chain H4	Q14624	3700	ITIH4	Human	RFU	Protein	0.005	38571.8	38571.8	1.478	FLAG	1.587	1.353	1.422	1.303	1.12	1.256	1.055	1.196	1.309	1.201	1.29	1.436	1.616	1.269	1.554
4815-25_3	SL016128	Thioredoxin domain-containing protein 12	TXD12	O95881	51060	TXNDC12	Human	RFU	Protein	1	2388.85	2388.85	1.2	PASS	1.186	1.281	1.12	1.232	1.27	1.183	1.319	1.181	1.203	1.306	1.338	1.048	1.23	1.278	1.115
4829-43_6	SL001737	14-3-3 protein sigma	STRATIFIN	P31947	2810	SFN	Human	RFU	Protein	1	628.65	628.65	1.303	PASS	1.164	1.315	1.206	1.3	1.187	1.217	1.201	1.19	1.178	1.219	1.373	1.106	1.336	1.304	1.178
4831-4_2	SL002823	L-Selectin	sL-Selectin	P14151	6402	SELL	Human	RFU	Protein	0.005	4940.3	4940.3	1.174	PASS	1.26	0.99	1.093	0.953	1.027	1.066	1.164	0.991	1.129	1.002	1.032	1.136	1.295	1.036	1.163
4832-75_2	SL004156	Tumor necrosis factor receptor superfamily member 10A	TRAIL R1	O00220	8797	TNFRSF10A	Human	RFU	Protein	40	1216.85	1216.85	1.94	FLAG	1.944	2.179	2.334	2.338	2.382	2.232	2.286	2.381	2.168	2.369	2.295	2.098	1.889	2.31	2.112
4834-61_2	SL002654	Ephrin type-A receptor 2	Epithelial cell kinase	P29317	1969	EPHA2	Human	RFU	Protein	40	2305.95	2305.95	0.822	PASS	0.797	0.862	0.927	0.934	0.759	0.775	0.763	0.812	0.821	0.8	0.871	0.866	0.844	0.878	0.916
4840-73_1	SL001729	Granulocyte colony-stimulating factor	G-CSF	P09919	1440	CSF3	Human	RFU	Protein	40	1666.3	1666.3	1.022	PASS	1.014	1.101	0.932	1.055	0.862	0.841	1.072	0.857	0.91	0.899	1.104	0.858	1.098	0.963	0.986
4842-62_2	SL000070	Glypican-3	Glypican 3	P51654	2719	GPC3	Human	RFU	Protein	40	983.45	983.45	1.122	PASS	1.108	1.106	1.054	1.163	0.943	1.022	0.963	1.008	1.039	1.05	1.111	1.051	1.148	1.101	1.112
4851-25_1	SL000125	Interleukin-1 alpha	IL-1a	P01583	3552	IL1A	Human	RFU	Protein	40	881.95	881.95	0.763	PASS	0.829	0.847	0.875	0.917	0.978	0.854	0.994	0.882	0.879	0.878	0.895	0.842	0.753	0.841	0.864
4859-6_1	SL004080	Bone morphogenetic protein receptor type-1A	BMPR1A	P36894	657	BMPR1A	Human	RFU	Protein	40	763.4	763.4	0.677	PASS	0.927	0.702	0.825	0.724	0.725	0.771	0.767	0.764	0.826	0.709	0.697	1.051	0.662	0.723	0.918
4862-63_1	SL004133	Bone morphogenetic protein receptor type-2	BMP RII	Q13873	659	BMPR2	Human	RFU	Protein	40	720.3	720.3	0.858	PASS	0.906	1.016	1.021	1.017	0.947	0.876	1.03	0.898	0.847	0.891	0.977	0.967	0.892	0.916	0.965
4866-59_2	SL004160	BDNF/NT-3 growth factors receptor	TrkB	Q16620	4915	NTRK2	Human	RFU	Protein	1	1000.5	1000.5	1.213	PASS	1.125	1.235	1.149	1.099	1.13	1.205	1.294	1.191	1.124	1.267	1.203	0.96	1.13	1.221	1.149
4867-15_2	SL003310	Vascular endothelial growth factor A; isoform 121	VEGF121	P15692	7422	VEGFA	Human	RFU	Protein	40	641.3	641.3	0.899	PASS	0.993	0.918	1.004	0.943	0.903	0.901	0.84	0.922	0.916	0.893	0.909	1.124	1.082	0.915	1.092
4874-3_1	SL000003	Angiogenin	Angiogenin	P03950	283	ANG	Human	RFU	Protein	0.005	3442.95	3442.95	0.899	PASS	0.848	0.924	0.948	0.881	0.926	0.901	1.052	0.934	0.924	0.977	0.907	0.785	0.81	1.018	0.92
4876-32_1	SL000357	Coagulation factor IX	Coagulation Factor IX	P00740	2158	F9	Human	RFU	Protein	0.005	10859.8	10859.8	1.029	PASS	0.967	1.007	1.032	1.062	1.147	1.145	1.05	1.124	1.131	1.208	1.042	0.984	1.011	1.062	1.065
4878-3_1	SL000360	Coagulation Factor X	Coagulation Factor X	P00742	2159	F10	Human	RFU	Protein	0.005	6419.65	6419.65	1.096	PASS	1.179	1.077	1.167	1.251	1.325	1.205	1.106	1.158	1.338	1.243	1.197	1.177	1.109	1.159	1.291
4880-21_1	SL007756	Growth/differentiation factor 2	GDF2	Q9UK05	2658	GDF2	Human	RFU	Protein	40	2312.2	2312.2	0.766	PASS	0.726	0.873	0.728	0.87	0.901	0.828	0.901	0.881	0.839	0.889	0.895	0.766	0.796	0.82	0.813
4883-56_2	SL000021	Insulin	Insulin	P01308	3630	INS	Human	RFU	Protein	40	173.75	173.75	0.797	PASS	0.848	0.972	0.901	0.898	1.028	1.013	1.125	0.982	0.924	1.01	0.912	0.798	0.746	0.88	0.871
4886-3_1	SL000516	C-C motif chemokine 7	MCP-3	P80098	6354	CCL7	Human	RFU	Protein	40	547.75	547.75	0.627	PASS	0.653	0.725	0.683	0.692	0.738	0.684	0.842	0.729	0.691	0.748	0.704	0.638	0.636	0.732	0.655
4889-82_1	SL009951	Protein Wnt-7a	WNT7A	O00755	7476	WNT7A	Human	RFU	Protein	40	235.6	235.6	0.598	FLAG	0.684	0.781	0.947	0.915	1.045	0.891	0.931	0.998	0.816	0.976	0.809	0.969	0.574	0.88	0.785
4890-10_1	SL003461	Corticotropin	ACTH	P01189	5443	POMC	Human	RFU	Protein	40	363.1	363.1	0.75	PASS	0.815	0.91	1.004	0.952	1.045	0.914	0.982	0.979	0.844	0.952	0.873	0.952	0.72	0.92	0.893
4891-50_1	SL000433	Glucagon	Glucagon	P01275	2641	GCG	Human	RFU	Protein	40	4842.65	4842.65	0.656	PASS	0.69	0.68	0.685	0.666	0.612	0.61	0.749	0.641	0.664	0.635	0.665	0.649	0.641	0.678	0.741
4900-8_1	SL000313	C3a anaphylatoxin	C3a	P01024	718	C3	Human	RFU	Protein	0.005	444.85	444.85	1.269	PASS	1.355	1.346	0.853	1.362	1.362	1.365	0.888	0.914	1.225	1.177	0.771	1.299	1.187	0.876	0.96
4903-72_1	SL003657	Calcineurin	Calcineurin	Q08209 P63098	5530 5534	PPP3CA PPP3R1	Human	RFU	Protein	1	695.85	695.85	1.289	PASS	1.342	1.26	1.263	1.366	1.146	1.144	1.122	1.212	1.256	1.25	1.293	1.169	1.281	1.315	1.294
4904-7_1	SL003710	Caspase-2	Caspase-2	P42575	835	CASP2	Human	RFU	Protein	40	296.25	296.25	0.742	PASS	0.775	0.893	0.934	0.927	1.064	0.911	1.015	1.019	0.941	1.075	0.901	0.967	0.7	0.978	0.885
4905-63_1	SL004814	Coactosin-like protein	Coactosin-like protein	Q14019	23406	COTL1	Human	RFU	Protein	40	1973.1	1973.1	0.753	FLAG	0.677	0.793	0.598	0.738	0.642	0.628	0.74	0.647	0.65	0.67	0.78	0.622	0.835	0.689	0.618
4906-35_1	SL000622	Coagulation Factor V	Coagulation Factor V	P12259	2153	F5	Human	RFU	Protein	0.005	60874.2	60874.2	2.557	FLAG	1.68	1.885	1.57	2.284	1.533	1.816	1.046	1.699	2.154	1.802	2.507	2.046	3.858	1.643	1.847
4907-56_1	SL000022	D-dimer	D-dimer	P02671 P02675 P02679	2243 2244 2266	FGA FGB FGG	Human	RFU	Protein	0.005	14061.4	14061.4	1.384	FLAG	1.186	1.336	1.233	1.351	1.065	1.102	1.15	1.127	1.1	1.155	1.383	1.094	1.425	1.358	1.188
4908-6_1	SL004482	Endoglin	Endoglin	P17813	2022	ENG	Human	RFU	Protein	40	1483.9	1483.9	0.533	FLAG	0.636	0.619	0.488	0.599	0.525	0.542	0.592	0.521	0.546	0.55	0.577	0.467	0.694	0.519	0.54
4909-68_1	SL005167	Galectin-8	Galectin-8	O00214	3964	LGALS8	Human	RFU	Protein	40	345.8	345.8	0.883	PASS	0.921	1.06	1.158	1.121	1.104	1.027	1.06	1.103	1.033	1.1	1.055	1.135	0.85	1.108	1.079
4910-21_1	SL004064	Phospholipase A2	GIB	P04054	5319	PLA2G1B	Human	RFU	Protein	40	834.8	834.8	0.846	PASS	0.826	0.949	0.794	0.877	0.824	0.816	0.961	0.796	0.814	0.862	0.949	0.764	0.963	0.82	0.784
4911-49_2	SL003643	Glutathione S-transferase P	Glutathione S-transferase Pi	P09211	2950	GSTP1	Human	RFU	Protein	40	3371.25	3371.25	0.941	PASS	0.833	0.885	0.789	0.829	0.631	0.689	0.72	0.666	0.737	0.714	0.857	0.771	0.929	0.785	0.831
4912-17_1	SL000280	Aspartate aminotransferase; cytoplasmic	GOT1	P17174	2805	GOT1	Human	RFU	Protein	40	3378.4	3378.4	0.627	FLAG	0.563	0.684	0.516	0.664	0.523	0.519	0.668	0.55	0.543	0.53	0.713	0.555	0.689	0.609	0.465
4913-78_1	SL003300	C-C motif chemokine 16	HCC-4	O15467	6360	CCL16	Human	RFU	Protein	1	28755	28755	1.049	PASS	1.046	1.004	1.074	1.021	1.076	1.065	1.174	1.037	1.123	1.075	1.027	0.96	0.975	1.112	1.08
4914-10_1	SL001766	Human Chorionic Gonadotropin	HCG	P01215;P01233	1081 1082	CGA CGB	Human	RFU	Protein	40	3130.85	3130.85	1.11	PASS	1.02	1.104	1.019	1.078	1.057	1.055	1.049	1.029	1.061	1.102	1.119	1.001	1.104	1.099	1.041
4915-64_2	SL000836	Hemoglobin	Hemoglobin	P69905; P68871	3039 3043	HBA1 HBB	Human	RFU	Protein	1	3572.75	3572.75	2.822	FLAG	2.956	2.794	2.646	2.614	1.89	2.263	2.109	2.561	2.039	2.333	2.307	1.833	3.018	2.499	2.134
4916-2_1	SL000460	Immunoglobulin D	IgD	P01880	3495 50802 3535	IGHD IGK@ IGL@	Human	RFU	Protein	1	29402.7	29402.7	1.098	PASS	1	1.076	0.979	1.078	0.992	0.954	1.144	0.892	1.052	0.978	1.132	0.851	1.079	1.021	1.04
4917-62_1	SL003182	Integrin alpha-V: beta-5 complex	Integrin aVb5	P06756; P18084	3685 3693	ITGAV ITGB5	Human	RFU	Protein	1	1088.1	1088.1	0.642	FLAG	0.591	0.643	0.593	0.611	0.625	0.622	0.612	0.636	0.638	0.641	0.662	0.539	0.6	0.67	0.587
4920-10_1	SL000510	Lysozyme C	Lysozyme	P61626	4069	LYZ	Human	RFU	Protein	1	94601.5	94601.5	1.11	PASS	0.983	1.014	1.042	1.05	0.882	0.93	0.894	0.841	0.949	0.841	1.058	0.969	1.045	1.029	1.033
4922-13_1	SL003189	C-C motif chemokine 19	MIP-3b	Q99731	6363	CCL19	Human	RFU	Protein	40	403.15	403.15	0.714	PASS	0.879	0.825	0.816	0.811	0.849	0.817	0.889	0.854	0.813	0.842	0.786	0.811	0.798	0.794	0.818
4923-79_1	SL005201	Muellerian-inhibiting factor	MIS	P03971	268	AMH	Human	RFU	Protein	1	9070.2	9070.2	1.023	PASS	0.871	0.966	0.811	1.017	0.801	0.684	1.293	0.854	0.954	0.852	1.245	0.743	1.023	0.94	0.878
4924-32_1	SL000521	Interstitial collagenase	MMP-1	P03956	4312	MMP1	Human	RFU	Protein	1	825.2	825.2	1.086	PASS	1.116	1.125	1.085	1.174	1.052	1.018	1.074	1.042	1.083	1.106	1.151	1.02	1.15	1.169	1.162
4925-54_2	SL000523	Collagenase 3	MMP-13	P45452	4322	MMP13	Human	RFU	Protein	40	655.15	655.15	1.006	PASS	0.932	0.987	0.925	0.966	0.86	0.858	0.894	0.857	0.888	0.895	1.001	0.925	0.946	0.931	0.956
4929-55_1	SL005102	Sex hormone-binding globulin	SHBG	P04278	6462	SHBG	Human	RFU	Protein	0.005	4751.55	4751.55	1.359	PASS	1.336	1.279	1.228	1.254	1.239	1.231	1.154	1.193	1.228	1.243	1.372	1.32	1.392	1.286	1.295
4930-21_1	SL005789	Stanniocalcin-1	Stanniocalcin-1	P52823	6781	STC1	Human	RFU	Protein	1	1847.3	1847.3	1.039	PASS	1.042	1.06	1.052	1.053	1.087	1.048	1.094	1.083	1.117	1.182	1.064	1.014	0.99	1.156	1.038
4931-59_1	SL000024	Tissue Factor	TF	P13726	2152	F3	Human	RFU	Protein	40	1211.75	1211.75	0.771	PASS	0.709	0.846	0.73	0.804	0.797	0.771	0.889	0.774	0.796	0.834	0.835	0.729	0.743	0.808	0.745
4956-2_1	SL000139	Epiregulin	EPI	O14944	2069	EREG	Human	RFU	Protein	40	777.6	777.6	0.933	PASS	0.904	1.016	0.961	1.004	0.916	0.895	1.013	0.929	0.885	0.975	1.002	0.947	0.923	0.967	0.949
4957-1_2	SL004605	40S ribosomal protein SA	40S ribosomal protein SA	P08865	3921	RPSA	Human	RFU	Protein	40	1745.8	1745.8	1.109	PASS	0.959	1.119	0.899	1.008	0.873	0.876	0.953	0.878	0.928	0.914	1.141	1.028	1.057	0.993	0.987
4959-2_1	SL004925	Anterior gradient protein 2 homolog	AGR2	O95994	10551	AGR2	Human	RFU	Protein	40	677.05	677.05	0.867	PASS	0.932	0.959	1.113	1.1	1.01	1.003	0.946	0.99	0.911	0.99	1.003	1.143	0.858	1.023	0.958
4960-72_1	SL004208	Annexin A1	annexin I	P04083	301	ANXA1	Human	RFU	Protein	40	4137	4137	0.696	PASS	0.671	0.732	0.636	0.727	0.656	0.623	0.845	0.676	0.691	0.692	0.729	0.625	0.776	0.695	0.711
4961-17_1	SL004209	Annexin A2	annexin II	P07355	302	ANXA2	Human	RFU	Protein	40	4695.35	4695.35	0.705	PASS	0.694	0.727	0.66	0.692	0.696	0.689	0.72	0.712	0.687	0.746	0.697	0.644	0.699	0.702	0.667
4962-52_1	SL012538	Cerebral dopamine neurotrophic factor	ARMEL	Q49AH0	441549	CDNF	Human	RFU	Protein	40	3361.95	3361.95	0.886	PASS	1.235	0.911	0.925	0.874	0.848	0.889	1.013	0.823	0.994	0.868	0.903	0.965	1.024	0.865	0.929
4963-19_1	SL011708	cAMP-regulated phosphoprotein 19	ARP19	P56211	10776	ARPP19	Human	RFU	Protein	40	1047.25	1047.25	1.156	FLAG	1.247	1.24	1.278	1.297	1.406	1.36	1.415	1.367	1.38	1.457	1.273	1.274	1.066	1.316	1.337
4964-67_1	SL007729	Endoplasmic reticulum aminopeptidase 1	ARTS1	Q9NZ08	51752	ERAP1	Human	RFU	Protein	40	67590.9	67590.9	1.54	FLAG	1.789	1.124	1.223	1.071	0.882	1.113	0.811	0.874	1.195	0.887	1.056	1.528	1.454	1.076	1.357
4965-27_1	SL005675	ATP synthase subunit beta; mitochondrial	ATP synthase beta chain	P06576	506	ATP5B	Human	RFU	Protein	40	2433.25	2433.25	3.255	FLAG	3.344	2.069	2.667	1.76	1.342	1.883	1.398	1.485	2.162	1.347	1.933	3.005	4.148	1.873	2.26
4967-1_1	SL008177	Complement component 1 Q subcomponent-binding protein; mitochondrial	C1QBP	Q07021	708	C1QBP	Human	RFU	Protein	1	4315.4	4315.4	1.217	PASS	1.052	1.193	1.026	1.157	0.995	1.068	1.059	0.993	1.037	1.025	1.26	1.069	1.335	1.121	1.036
4968-50_1	SL008099	Macrophage-capping protein	CAPG	P40121	822	CAPG	Human	RFU	Protein	40	975.15	975.15	0.632	PASS	0.604	0.662	0.611	0.655	0.677	0.665	0.71	0.655	0.705	0.667	0.671	0.664	0.6	0.702	0.652
4969-2_1	SL004866	Carbonic anhydrase 1	Carbonic anhydrase I	P00915	759	CA1	Human	RFU	Protein	1	23484.3	23484.3	1.054	PASS	1.158	0.968	1.068	0.909	0.996	1.115	0.983	1.012	1.047	0.951	0.944	1.022	1.058	0.929	1.031
4970-55_1	SL000339	Carbonic anhydrase 2	carbonic anhydrase II	P00918	760	CA2	Human	RFU	Protein	40	339.5	339.5	0.886	PASS	0.904	0.967	1.094	1.059	1.064	1.019	1.006	1.032	1.04	1.074	0.973	1.088	0.853	1.026	1.084
4971-1_1	SL008380	Cathepsin Z	CATZ	Q9UBR2	1522	CTSZ	Human	RFU	Protein	1	4467.05	4467.05	1.065	PASS	1.022	1.112	0.954	1.098	1.053	1.068	1.132	0.979	1.036	1.102	1.212	0.926	1.11	1.044	0.981
4973-18_1	SL003728	Baculoviral IAP repeat-containing protein 3	cIAP-2	Q13489	330	BIRC3	Human	RFU	Protein	40	225.25	225.25	1.012	FLAG	1.461	1.201	1.36	1.125	1.224	1.403	1.139	1.163	1.191	1.116	1.12	1.757	1.206	1.056	1.38
4976-57_1	SL013240	Adapter molecule crk	CRK	P46108	1398	CRK	Human	RFU	Protein	40	3779.15	3779.15	0.523	FLAG	0.565	0.522	0.539	0.495	0.476	0.487	0.576	0.498	0.484	0.493	0.523	0.478	0.558	0.489	0.508
4978-54_2	SL011628	Drebrin-like protein	DBNL	Q9UJU6	28988	DBNL	Human	RFU	Protein	1	2025.6	2025.6	1.12	PASS	1.259	1.135	0.952	1.026	0.899	0.861	1.075	0.901	0.923	0.928	1.239	1.133	1.071	0.938	1.045
4979-34_2	SL008178	Dermatopontin	DERM	Q07507	1805	DPT	Human	RFU	Protein	1	3912.6	3912.6	1.37	FLAG	1.256	1.282	1.368	1.175	1.121	1.244	1.145	1.258	1.272	1.147	1.37	1.13	1.115	1.332	1.439
4981-6_1	SL008709	Desmocollin-3	DSC3	Q14574	1825	DSC3	Human	RFU	Protein	40	288.7	288.7	0.634	PASS	0.742	0.746	0.914	0.861	1.019	0.92	0.924	0.99	0.886	0.929	0.765	0.992	0.69	0.843	0.836
4982-54_1	SL004458	Elafin	Elafin	P19957	5266	PI3	Human	RFU	Protein	1	8520.4	8520.4	0.932	PASS	1.25	0.911	1.028	0.973	0.92	0.895	0.925	0.887	0.957	0.883	0.914	0.926	0.904	0.97	1.067
4983-6_1	SL003522	Endoplasmic reticulum resident protein 29	ERP29	P30040	10961	ERP29	Human	RFU	Protein	0.005	6124	6124	1.36	FLAG	1.182	1.615	1.087	1.36	1.073	1.119	1.219	1.123	1.322	1.195	1.585	1.294	1.581	1.265	1.213
4984-83_1	SL006378	S-formylglutathione hydrolase	Esterase D	P10768	2098	ESD	Human	RFU	Protein	40	4460.8	4460.8	0.649	FLAG	0.547	0.633	0.529	0.612	0.521	0.558	0.551	0.546	0.579	0.582	0.619	0.497	0.653	0.592	0.545
4985-11_1	SL005352	Fatty acid-binding protein; epidermal	FABPE	Q01469	2171	FABP5	Human	RFU	Protein	40	725.6	725.6	0.93	PASS	0.887	0.997	0.881	0.958	0.885	0.926	0.993	0.872	0.953	0.959	0.983	0.9	1.004	0.919	0.857
4986-59_1	SL012248	Focal adhesion kinase 1	FAK1	Q05397	5747	PTK2	Human	RFU	Protein	40	250.4	250.4	0.886	PASS	0.977	1.006	1.122	1.04	1.175	1.14	1.108	1.135	1.112	1.103	1.006	1.075	0.949	1.013	1.01
4987-17_1	SL010373	Immunoglobulin alpha Fc receptor	FCAR	P24071	2204	FCAR	Human	RFU	Protein	40	191.9	191.9	1.053	PASS	1.147	1.124	1.198	1.1	1.164	1.244	1.189	1.138	1.067	1.172	1.102	1.169	1.06	1.114	1.21
4988-49_2	SL002036	Fibroblast growth factor receptor 4	FGFR4	P22455	2264	FGFR4	Human	RFU	Protein	40	1378.15	1378.15	1.024	PASS	0.924	1.032	0.91	0.966	0.847	0.871	0.929	0.856	0.914	0.917	1.078	0.864	0.967	1.006	0.971
4989-7_1	SL003341	Fibrinogen gamma chain	Fibrinogen g-chain dimer	P02679	2266	FGG	Human	RFU	Protein	0.005	65317.9	65317.9	1.414	FLAG	1.222	1.289	1.314	1.305	1.176	1.227	1.165	1.195	1.154	1.152	1.336	1.184	1.344	1.317	1.261
4990-87_1	SL006460	Platelet glycoprotein Ib alpha chain	GP1BA	P07359	2811	GP1BA	Human	RFU	Protein	1	1233.65	1233.65	1.231	PASS	1.127	1.233	1.194	1.136	1.211	1.297	1.248	1.205	1.211	1.265	1.261	1.007	1.204	1.227	1.173
4991-12_1	SL012469	Glypican-5	GPC5	P78333	2262	GPC5	Human	RFU	Protein	40	943.95	943.95	1.108	FLAG	1.493	1.024	0.961	0.982	0.98	0.974	1.133	0.951	1.221	1.008	1.059	1.288	1.122	0.961	1.04
4992-49_1	SL007173	Granulins	GRN	P28799	2896	GRN	Human	RFU	Protein	1	23992	23992	1.111	PASS	1.123	1.034	1.112	1.003	1.18	1.199	1.021	1.069	1.169	1.031	1.009	1.029	1.062	1.038	1.083
4993-16_1	SL000670	Glutathione S-transferase A3	GSTA3	Q16772	2940	GSTA3	Human	RFU	Protein	40	252.9	252.9	0.91	PASS	1.037	0.822	0.997	0.854	0.789	0.858	0.763	0.827	0.907	0.752	0.846	1.111	0.763	0.852	1.037
4994-178_1	SL002756	Heterogeneous nuclear ribonucleoprotein K	hnRNP K	P61978	3190	HNRNPK	Human	RFU	Protein	40	306.45	306.45	1.006	PASS	1.189	1.093	1.208	1.189	1.221	1.114	1.178	1.145	1.245	1.181	1.137	1.259	1.147	1.14	1.156
4995-16_1	SL003930	15-hydroxyprostaglandin dehydrogenase [NAD(+)]	HPG-	P15428	3248	HPGD	Human	RFU	Protein	1	998	998	0.982	PASS	0.986	0.943	0.831	0.984	0.904	0.882	0.933	0.841	0.987	0.862	1.006	1.106	0.982	0.904	0.897
4996-66_1	SL006448	Histidine-rich glycoprotein	HRG	P04196	3273	HRG	Human	RFU	Protein	0.005	4022.1	4022.1	1.026	FLAG	1.707	1.28	1.638	1.036	1.02	1.497	1.268	1.036	0.999	1.339	1.052	1.296	1.692	0.958	1.08
4997-19_1	SL011616	Eukaryotic initiation factor 4A-III	IF4A3	P38919	9775	EIF4A3	Human	RFU	Protein	40	602.95	602.95	0.928	PASS	1.204	1.007	1.107	1.122	1.159	1.132	1.098	1.148	1.126	1.149	1.028	1.178	0.985	1.078	1.087
4998-50_2	SL007025	Tyrosine-protein kinase JAK2	JAK2	O60674	3717	JAK2	Human	RFU	Protein	1	122873	122873	1.226	PASS	0.962	1.12	0.988	1.105	0.846	0.874	0.86	0.835	0.92	0.849	1.15	0.86	1.077	1.07	0.962
5000-52_1	SL006522	Galectin-3-binding protein	LG3BP	Q08380	3959	LGALS3BP	Human	RFU	Protein	1	1072.85	1072.85	1.212	PASS	1.083	1.112	0.813	1.065	0.911	0.894	1.342	0.857	0.994	1.019	1.392	0.87	1.256	1.006	0.914
5001-6_2	SL001973	Mammaglobin-B	Mammaglobin 2	O75556	4246	SCGB2A1	Human	RFU	Protein	1	7542.75	7542.75	1.104	PASS	0.932	1.05	0.86	1.05	0.87	0.844	0.907	0.824	0.846	0.85	1.202	0.835	1.072	0.986	0.824
5002-76_1	SL002646	Matrix metalloproteinase-14	MMP-14	P50281	4323	MMP14	Human	RFU	Protein	40	1663.1	1663.1	1.737	FLAG	1.463	1.711	1.632	1.679	1.587	1.556	1.419	1.532	1.549	1.722	1.603	1.383	1.611	1.594	1.682
5004-69_1	SL007453	Mitogen-activated protein kinase 11	MK11	Q15759	5600	MAPK11	Human	RFU	Protein	40	775.6	775.6	0.846	PASS	0.847	0.928	0.9	0.957	0.901	0.824	0.919	0.874	0.872	0.918	0.938	0.888	0.842	0.929	0.897
5005-4_1	SL007281	Mitogen-activated protein kinase 12	MK12	P53778	6300	MAPK12	Human	RFU	Protein	40	514.75	514.75	0.708	PASS	0.786	0.833	0.871	0.919	1.027	0.962	0.999	0.975	0.905	1.017	0.86	0.864	0.71	0.903	0.847
5006-71_1	SL006993	Mitogen-activated protein kinase 13	MK13	O15264	5603	MAPK13	Human	RFU	Protein	40	490.9	490.9	1.175	FLAG	1.12	1.026	1.225	1.071	1.08	1.108	1.027	1.128	1.345	1.073	1.014	1.468	0.939	1.064	1.518
5007-1_1	SL006920	Mitogen-activated protein kinase 14	MAPK14	Q16539	1432	MAPK14	Human	RFU	Protein	1	1056.85	1056.85	1.003	PASS	1.178	0.941	0.922	0.91	0.982	0.998	0.929	0.988	0.972	0.992	0.91	0.912	1.132	0.905	0.933
5008-51_1	SL001815	Superoxide dismutase [Mn]; mitochondrial	Mn SOD	P04179	6648	SOD2	Human	RFU	Protein	1	49559.4	49559.4	1.57	FLAG	1.615	1.419	1.201	1.299	1.051	1.184	1.351	1.008	1.248	0.999	1.515	1.182	1.793	1.083	1.149
5009-11_1	SL005846	Moesin	Moesin	P26038	4478	MSN	Human	RFU	Protein	40	879.4	879.4	0.688	PASS	0.67	0.738	0.714	0.76	0.671	0.646	0.713	0.684	0.671	0.707	0.746	0.643	0.683	0.719	0.665
5011-11_1	SL003685	Nicotinamide phosphoribosyltransferase	PBEF	P43490	10135	NAMPT	Human	RFU	Protein	40	507.15	507.15	0.698	PASS	0.717	0.814	0.751	0.84	0.885	0.802	0.792	0.7	0.76	0.783	0.821	0.692	0.725	0.694	0.645
5012-67_1	SL004296	Adenylate kinase isoenzyme 1	Myokinase; human	P00568	203	AK1	Human	RFU	Protein	1	22087.8	22087.8	1.043	PASS	1.005	1.001	0.999	0.969	1.035	1.038	1.069	1.006	1.039	1.052	0.997	0.963	0.976	1.073	1.031
5013-2_1	SL004915	Chloride intracellular channel protein 1	NCC27	O00299	1192	CLIC1	Human	RFU	Protein	1	2195.3	2195.3	1.161	PASS	1.075	1.025	0.898	1.008	0.922	0.89	0.851	0.88	0.931	0.897	0.979	0.852	1.002	0.937	0.938
5014-49_1	SL006091	Cytoplasmic protein NCK1	NCK1	P16333	4690	NCK1	Human	RFU	Protein	40	842.85	842.85	1.04	PASS	1.087	1.116	1.121	1.168	1.166	1.106	1.188	1.126	1.087	1.163	1.164	1.084	1.068	1.139	1.089
5015-15_1	SL003440	Platelet-activating factor acetylhydrolase	PAFAH	Q13093	7941	PLA2G7	Human	RFU	Protein	0.005	784.55	784.55	1.45	FLAG	1.32	1.564	1.224	1.515	1.244	1.31	1.435	1.178	1.249	1.217	1.642	1.206	1.637	1.32	1.175
5016-61_2	SL008933	Protein deglycase DJ-1	PARK7	Q99497	11315	PARK7	Human	RFU	Protein	40	419.1	419.1	0.975	PASS	0.891	1.033	0.853	0.868	0.874	0.841	1.004	0.833	0.871	0.927	0.998	0.826	0.925	0.86	0.841
5017-19_1	SL004932	Peroxiredoxin-5; mitochondrial	Peroxiredoxin-5	P30044	25824	PRDX5	Human	RFU	Protein	40	396.3	396.3	0.952	PASS	1.045	1.195	1.222	1.221	1.344	1.329	1.312	1.291	1.218	1.338	1.145	1.197	1.017	1.183	1.136
5018-68_1	SL005694	Peroxiredoxin-6	Peroxiredoxin-6	P30041	9588	PRDX6	Human	RFU	Protein	0.005	354.75	354.75	1.072	PASS	1.077	0.887	0.92	0.962	0.846	0.951	0.877	0.897	0.931	0.856	0.981	0.966	1.069	0.985	0.888
5019-16_2	SL002803	Ubiquitin carboxyl-terminal hydrolase isozyme L1	PGP9.5	P09936	7345	UCHL1	Human	RFU	Protein	1	1310.45	1310.45	1.093	PASS	1.148	1.201	1.013	1.212	0.827	0.804	1.084	0.843	0.854	0.823	1.294	1.012	1.095	1.161	0.836
5020-50_1	SL003653	Phosphoglycerate kinase 1	phosphoglycerate kinase 1	P00558	5230	PGK1	Human	RFU	Protein	40	2107.8	2107.8	0.785	FLAG	0.89	0.758	0.636	0.69	0.557	0.626	0.656	0.602	0.653	0.579	0.712	0.857	1.027	0.647	0.742
5021-13_1	SL004914	Inorganic pyrophosphatase	PPase	Q15181	5464	PPA1	Human	RFU	Protein	40	20339	20339	1.419	FLAG	1.332	1.092	1.118	0.963	0.929	1.14	0.797	0.91	1.343	0.834	0.972	1.307	1.529	0.938	1.362
5023-23_1	SL009792	Adenylosuccinate lyase	PUR8	P30566	158	ADSL	Human	RFU	Protein	40	4070.45	4070.45	0.855	FLAG	1.509	0.722	0.578	0.67	0.504	0.644	0.857	0.616	0.64	0.503	0.835	1.222	1.165	1.001	0.552
5024-67_1	SL002522	Retinoblastoma-associated protein	Rb	P06400	5925	RB1	Human	RFU	Protein	40	1373.25	1373.25	1.357	FLAG	1.416	1.315	1.415	1.342	1.119	1.23	1.078	1.129	1.129	1.144	1.328	1.595	1.314	1.336	1.359
5026-66_1	SL008059	40S ribosomal protein S3	RS3	P23396	6188	RPS3	Human	RFU	Protein	40	267.65	267.65	0.919	PASS	1.153	0.95	1.156	1.072	1.202	1.205	1.108	1.224	1.041	1.141	0.971	1.18	0.962	1.062	1.196
5028-59_1	SL005764	Scavenger receptor cysteine-rich type 1 protein M130	sCD163	Q86VB7	9332	CD163	Human	RFU	Protein	1	2551.7	2551.7	0.844	PASS	0.852	0.922	0.889	0.932	1.106	1.098	1.035	0.924	0.933	1.1	0.976	0.895	0.85	0.878	0.854
5029-3_1	SL006528	Prolyl endopeptidase FAP	SEPR	Q12884	2191	FAP	Human	RFU	Protein	1	844.75	844.75	0.931	PASS	0.935	0.961	0.861	0.878	0.909	0.92	1.054	0.878	0.941	0.921	1.003	0.845	1.11	0.883	0.885
5030-52_1	SL006629	NAD-dependent protein deacetylase sirtuin-2	SIRT2	Q8IXJ6	22933	SIRT2	Human	RFU	Protein	40	5018.35	5018.35	1.999	FLAG	1.797	1.341	1.513	1.207	1.058	1.477	1.101	1.025	1.656	1.077	1.297	1.747	2.194	1.159	1.534
5031-10_1	SL008190	Spectrin alpha chain; non-erythrocytic 1	SPTA2	Q13813	6709	SPTAN1	Human	RFU	Protein	40	335.45	335.45	1.33	FLAG	1.247	1.303	1.334	1.282	1.334	1.35	1.307	1.271	1.349	1.368	1.347	1.54	1.263	1.296	1.483
5032-64_1	SL009868	FACT complex subunit SSRP1	SSRP1	Q08945	6749	SSRP1	Human	RFU	Protein	40	373.15	373.15	0.835	PASS	0.836	0.966	0.998	1.037	1.064	1.036	1.058	1.036	0.978	1.081	0.993	0.99	0.836	1.051	0.987
5033-27_1	SL004737	Tropomyosin alpha-1 chain	Tropomyosin 1 alpha chain	P09493	7168	TPM1	Human	RFU	Protein	40	828.85	828.85	1.09	PASS	1.131	1.011	1.064	1.026	0.983	1.186	0.951	1.05	1.074	0.978	0.978	1.234	1.169	1.025	1.209
5034-79_1	SL010388	Trypsin-2	Trypsin 2	P07478	5645	PRSS2	Human	RFU	Protein	1	2772.7	2772.7	1.257	FLAG	1.552	0.843	1.47	0.869	0.924	1.432	0.955	1.277	1.126	0.835	0.842	1.164	1.177	0.895	1.347
5035-7_1	SL000142	Thymidylate synthase	TS	P04818	7298	TYMS	Human	RFU	Protein	40	341.95	341.95	0.983	PASS	0.902	1.136	1.117	1.177	1.045	0.984	1.1	1.078	0.988	1.052	1.11	1.149	1.032	1.168	1.043
5036-50_1	SL004782	Tumor necrosis factor-inducible gene 6 protein	TSG-6	P98066	7130	TNFAIP6	Human	RFU	Protein	40	1282.75	1282.75	1.102	PASS	1.122	1.097	0.999	1.065	1.18	1.168	1.248	1.128	1.267	1.199	1.144	0.999	1.042	1.056	1.127
5060-62_3	SL004852	Programmed cell death 1 ligand 1	B7-H1	Q9NZQ7	29126	CD274	Human	RFU	Protein	40	983.05	983.05	0.86	PASS	0.802	0.922	0.807	0.961	0.833	0.884	0.888	0.811	0.871	0.871	0.928	0.81	1.034	0.821	0.867
5061-27_3	SL004853	ICOS ligand	B7-H2	O75144	23308	ICOSLG	Human	RFU	Protein	1	1013.75	1013.75	0.891	PASS	0.88	0.888	0.758	0.902	0.764	0.743	1.08	0.847	0.735	0.74	1.026	0.858	0.914	0.954	0.71
5062-60_3	SL011100	CD226 antigen	CD226	Q15762	10666	CD226	Human	RFU	Protein	40	877.25	877.25	0.654	PASS	0.615	0.755	0.666	0.754	0.744	0.689	0.794	0.688	0.601	0.743	0.769	0.642	0.639	0.698	0.627
5063-12_2	SL014188	Natural killer cell receptor 2B4	CD244	Q9BZW8	51744	CD244	Human	RFU	Protein	40	147.15	147.15	0.907	PASS	0.935	1.05	1.122	1.106	1.062	1.006	1.02	1.038	0.928	1.012	1.064	1.097	0.968	1.068	1.019
5065-8_2	SL014229	CD83 antigen	CD83	Q01151	9308	CD83	Human	RFU	Protein	40	262.65	262.65	0.881	PASS	0.861	0.993	0.929	1.006	0.846	0.794	0.937	0.831	0.843	0.859	0.993	0.882	0.901	0.886	0.914
5066-134_3	SL014270	CMRF35-like molecule 6	CLM6	Q08708	10871	CD300C	Human	RFU	Protein	1	3599.05	3599.05	0.845	PASS	0.877	0.873	0.908	0.89	0.885	0.838	0.961	0.845	0.894	0.836	0.908	0.824	0.692	0.941	1
5068-54_3	SL014208	Cytotoxic and regulatory T-cell molecule	CRTAM	O95727	56253	CRTAM	Human	RFU	Protein	40	550.05	550.05	1.131	FLAG	1.288	1.26	1.388	1.41	1.52	1.374	1.419	1.462	1.365	1.48	1.316	1.423	1.094	1.411	1.337
5069-9_3	SL004556	Complement decay-accelerating factor	DAF	P08174	1604	CD55	Human	RFU	Protein	1	15409.6	15409.6	1.151	FLAG	1.258	1.032	1.047	0.933	1.063	1.129	0.912	1.105	1.435	0.966	0.965	1.133	1.113	0.975	1.265
5070-76_3	SL003739	Tumor necrosis factor receptor superfamily member 6B	DcR3	O95407	8771	TNFRSF6B	Human	RFU	Protein	40	571.35	571.35	0.843	PASS	0.843	0.97	0.982	1.007	0.964	0.908	1.028	0.919	0.917	0.985	0.998	0.92	0.799	0.974	0.958
5076-53_2	SL014294	Ephrin type-A receptor 10	EPHAA	Q5JZY3	284656	EPHA10	Human	RFU	Protein	40	331.05	331.05	0.764	PASS	0.832	0.893	0.965	0.974	0.917	0.856	0.93	0.924	0.837	0.89	0.918	0.877	0.705	0.919	0.935
5077-28_3	SL007179	Ephrin type-B receptor 2	EPHB2	P29323	2048	EPHB2	Human	RFU	Protein	40	16027.4	16027.4	1.004	PASS	0.998	0.932	0.968	0.877	0.944	0.983	1.001	0.923	1	0.953	0.915	0.907	0.853	0.95	1.046
5078-82_3	SL008414	Ephrin type-B receptor 6	EphB6	O15197	2051	EPHB6	Human	RFU	Protein	1	1496.5	1496.5	0.866	PASS	0.911	0.928	0.903	0.914	0.912	0.906	1.007	0.909	0.914	0.937	0.954	0.844	0.871	0.985	0.93
5080-131_3	SL007429	Transmembrane glycoprotein NMB	GPNMB	Q14956	10457	GPNMB	Human	RFU	Protein	1	4770.6	4770.6	1.238	PASS	1.232	1.209	1.119	1.262	1.253	1.24	1.198	1.195	1.258	1.296	1.295	1.152	1.291	1.247	1.158
5082-51_3	SL004849	X-linked interleukin-1 receptor accessory protein-like 2	IL-1 sR9	Q9NP60	26280	IL1RAPL2	Human	RFU	Protein	40	962.35	962.35	1.42	FLAG	1.351	1.575	1.521	1.625	1.405	1.403	1.493	1.425	1.347	1.468	1.603	1.527	1.467	1.559	1.369
5084-154_3	SL005174	Interleukin-17 receptor B	IL-17B R	Q9NRM6	55540	IL17RB	Human	RFU	Protein	40	1344.4	1344.4	0.985	PASS	0.849	1.009	0.812	0.949	0.858	0.83	1.015	0.804	0.907	0.888	1.036	0.799	1.007	0.903	0.93
5085-18_3	SL005181	Interleukin-20 receptor subunit alpha	IL-20 Ra	Q9UHF4	53832	IL20RA	Human	RFU	Protein	40	217.25	217.25	0.59	FLAG	0.646	0.743	0.81	0.816	0.936	0.862	0.899	0.923	0.81	0.908	0.757	0.766	0.593	0.821	0.748
5087-5_3	SL005183	Interleukin-22 receptor subunit alpha-2	IL-22BP	Q969J5	116379	IL22RA2	Human	RFU	Protein	40	2293.95	2293.95	0.836	PASS	0.805	0.846	0.787	0.801	0.8	0.864	0.845	0.833	0.818	0.873	0.821	0.757	0.84	0.859	0.794
5088-175_3	SL005185	Interleukin-23 receptor	IL-23 R	Q5VWK5	149233	IL23R	Human	RFU	Protein	40	2840.65	2840.65	1.111	PASS	1.08	1.117	1.066	1.109	1.112	1.107	1.107	1.134	1.147	1.209	1.123	1.041	1.009	1.197	1.087
5089-11_3	SL005189	Interleukin-7 receptor subunit alpha	IL-7 Ra	P16871	3575	IL7R	Human	RFU	Protein	40	1078.6	1078.6	1.04	PASS	0.957	1.055	1.089	1.113	1.092	1.076	1.082	1.075	1.054	1.158	1.121	0.961	0.943	1.11	1.042
5090-49_2	SL005190	Leukocyte immunoglobulin-like receptor subfamily B member 1	ILT-2	Q8NHL6	10859	LILRB1	Human	RFU	Protein	1	3966.65	3966.65	1.072	PASS	0.993	1.159	1.023	1.145	1.068	1.027	1.097	1.024	1.057	1.056	1.184	0.946	1.067	1.144	1.072
5091-28_3	SL005191	Leukocyte immunoglobulin-like receptor subfamily B member 2	ILT-4	Q8N423	10288	LILRB2	Human	RFU	Protein	1	9513.45	9513.45	1.034	PASS	1.031	1.02	1.072	0.992	1.023	1.045	1.01	1.039	1.098	1.048	1.007	0.998	1.039	1.089	1.12
5092-51_3	SL007328	Protein jagged-1	JAG1	P78504	182	JAG1	Human	RFU	Protein	1	515.5	515.5	1.726	FLAG	1.724	1.487	1.491	1.615	1.554	1.581	1.461	1.384	1.985	1.434	1.725	1.95	1.993	1.457	1.509
5093-47_3	SL007774	Protein jagged-2	JAG2	Q9Y219	3714	JAG2	Human	RFU	Protein	40	298.9	298.9	0.836	FLAG	0.98	0.935	1.155	1.057	1.096	0.963	0.991	1.052	0.964	0.995	0.939	1.505	0.941	0.982	1.085
5094-62_3	SL009202	Junctional adhesion molecule-like	JAML1	Q86YT9	120425	AMICA1	Human	RFU	Protein	40	418.95	418.95	0.796	PASS	1.125	0.963	1.092	1	1.011	1.124	0.978	0.989	1.086	0.94	0.93	1.298	1.133	0.928	1.315
5095-21_3	SL012698	Killer cell immunoglobulin-like receptor 2DL4	KI2L4	Q99706	3805	KIR2DL4	Human	RFU	Protein	40	951.15	951.15	0.969	PASS	0.975	1.022	1.025	1.001	1.017	1.035	1.031	1.004	1.087	1.066	1.031	0.952	0.959	1.085	1.078
5096-51_3	SL014269	Killer cell immunoglobulin-like receptor 3DL2	KI3L2	P43630	3812	KIR3DL2	Human	RFU	Protein	40	3237.5	3237.5	1.315	PASS	1.188	1.182	1.083	1.072	1.059	1.091	1.126	1.054	1.193	1.145	1.221	1.011	1.178	1.208	1.155
5097-14_3	SL014289	Killer cell immunoglobulin-like receptor 3DS1	KI3S1	Q14943	3813	KIR3DS1	Human	RFU	Protein	40	389.2	389.2	0.852	PASS	0.891	0.897	0.98	0.984	1.046	0.981	0.998	1	0.928	1.009	0.933	1.104	0.767	0.977	0.941
5098-79_3	SL014209	Killer cell lectin-like receptor subfamily F member 1	KLRF1	Q9NZS2	51348	KLRF1	Human	RFU	Protein	40	314.45	314.45	0.945	PASS	1.096	1.001	1.124	1.046	1.094	1.115	1.064	1.059	1.215	1.062	1.016	1.374	1.032	1.037	1.103
5099-14_3	SL005195	Lymphocyte activation gene 3 protein	LAG-3	P18627	3902	LAG3	Human	RFU	Protein	40	6101.35	6101.35	0.541	FLAG	0.65	0.602	0.572	0.614	0.733	0.675	0.781	0.67	0.663	0.718	0.59	0.543	0.61	0.57	0.543
5100-53_3	SL005197	Lysosome membrane protein 2	LIMP II	Q14108	950	SCARB2	Human	RFU	Protein	40	384	384	1.068	FLAG	1.159	1.307	1.49	1.505	1.715	1.448	1.622	1.602	1.429	1.595	1.338	1.527	1.051	1.432	1.383
5102-55_3	SL005200	MHC class I polypeptide-related sequence B	MICB	Q29980	4277	MICB	Human	RFU	Protein	40	918.15	918.15	0.52	FLAG	0.53	0.569	0.567	0.579	0.608	0.588	0.648	0.609	0.616	0.623	0.566	0.594	0.519	0.597	0.592
5103-30_3	SL014288	Cell surface glycoprotein CD200 receptor 1	MO2R1	Q8TD46	131450	CD200R1	Human	RFU	Protein	40	966.6	966.6	0.463	FLAG	0.485	0.466	0.461	0.452	0.475	0.493	0.587	0.475	0.514	0.522	0.479	0.413	0.453	0.446	0.474
5104-57_3	SL005207	Natural cytotoxicity triggering receptor 1	NKp46	O76036	9437	NCR1	Human	RFU	Protein	40	2246.9	2246.9	0.878	PASS	0.822	0.858	0.768	0.808	0.717	0.737	0.814	0.735	0.788	0.758	0.86	0.754	0.975	0.805	0.801
5105-2_3	SL005208	Reticulon-4 receptor	Nogo Receptor	Q9BZR6	65078	RTN4R	Human	RFU	Protein	1	1450.95	1450.95	0.952	PASS	0.967	1.009	0.932	0.929	1.081	1.036	1.152	1.017	1.018	1.12	1.026	0.819	0.886	1.057	0.916
5106-52_3	SL007356	Neurogenic locus notch homolog protein 2	NOTC2	Q04721	4853	NOTCH2	Human	RFU	Protein	40	649.2	649.2	0.972	PASS	0.988	1.015	1.068	1.019	0.954	0.951	1.022	0.98	1.017	1.035	1.024	1.007	0.973	1.042	1.079
5107-7_2	SL005703	Neurogenic locus notch homolog protein 1	Notch 1	P46531	4851	NOTCH1	Human	RFU	Protein	1	22410.5	22410.5	1.166	PASS	1.133	1.085	1.075	1.039	0.952	1.011	0.949	0.92	0.984	0.962	1.053	1.052	1.219	1.032	1.071
5108-72_3	SL005209	Neurogenic locus notch homolog protein 3	Notch-3	Q9UM47	4854	NOTCH3	Human	RFU	Protein	0.005	592.15	592.15	1.408	FLAG	1.533	1.251	1.243	1.218	1.137	1.228	1.176	1.15	1.222	1.161	1.258	1.459	1.359	1.237	1.251
5109-24_3	SL005210	Neuronal cell adhesion molecule	Nr-CAM	Q92823	4897	NRCAM	Human	RFU	Protein	40	15552.1	15552.1	1.469	FLAG	1.437	1.12	0.998	0.955	0.872	0.904	0.85	0.842	1.293	0.833	1.057	1.237	1.569	0.902	1.223
5110-84_3	SL009054	Neurexin-1-beta	NRX1B	P58400	9378	NRXN1	Human	RFU	Protein	40	676.3	676.3	1.244	FLAG	1.422	1.386	1.592	1.568	1.892	1.713	1.795	1.707	1.653	1.747	1.493	1.622	1.319	1.555	1.66
5111-15_3	SL008728	Neurexin-3-beta	NRX3B	Q9HDB5	9369	NRXN3	Human	RFU	Protein	1	794.9	794.9	1.132	PASS	1.163	1.139	1.129	1.126	1.089	1.08	1.129	1.092	1.106	1.122	1.165	1.051	1.104	1.183	1.117
5112-73_3	SL014268	OX-2 membrane glycoprotein	OX2G	P41217	4345	CD200	Human	RFU	Protein	40	2171.15	2171.15	0.873	PASS	0.883	0.877	0.806	0.83	0.787	0.833	0.995	0.78	0.878	0.859	0.894	0.811	0.928	0.783	0.808
5114-65_3	SL005212	Prolactin receptor	Prolactin Receptor	P16471	5618	PRLR	Human	RFU	Protein	40	1258.9	1258.9	1.033	PASS	0.944	1.055	0.949	1.057	0.938	0.921	1.038	0.916	0.953	0.972	1.076	0.933	1.052	1.004	0.934
5115-31_3	SL005213	Tumor necrosis factor receptor superfamily member 19L	RELT	Q969Z4	84957	RELT	Human	RFU	Protein	40	1880.75	1880.75	0.658	PASS	0.79	0.711	0.787	0.667	0.738	0.759	0.865	0.731	0.815	0.762	0.695	0.698	0.623	0.727	0.846
5116-62_2	SL007680	Roundabout homolog 2	ROBO2	Q9HCK4	6092	ROBO2	Human	RFU	Protein	1	3257.1	3257.1	2.093	FLAG	2.699	1.615	1.86	1.396	1.199	1.715	1.234	1.269	1.72	1.211	1.549	1.967	2.847	1.41	1.897
5117-14_3	SL014148	Roundabout homolog 3	ROBO3	Q96MS0	64221	ROBO3	Human	RFU	Protein	40	331.1	331.1	0.806	PASS	0.873	0.987	1.066	1.092	1.196	1.108	1.135	1.15	1.022	1.157	0.996	1.069	0.806	1.076	0.993
5121-3_2	SL014248	Semaphorin-6B	SEM6B	Q9H3T3	10501	SEMA6B	Human	RFU	Protein	40	2741.4	2741.4	0.825	PASS	0.783	0.918	0.842	0.971	0.691	0.698	0.711	0.688	0.733	0.659	0.947	0.758	0.78	0.855	0.953
5122-92_2	SL005214	Semaphorin-6A	Semaphorin-6A	Q9H2E6	57556	SEMA6A	Human	RFU	Protein	40	10270.9	10270.9	0.895	PASS	0.963	0.857	0.925	0.76	0.676	0.81	0.639	0.681	0.758	0.62	0.77	0.8	0.956	0.7	1.123
5124-69_3	SL005169	Intercellular adhesion molecule 5	sICAM-5	Q9UMF0	7087	ICAM5	Human	RFU	Protein	1	908.7	908.7	0.88	PASS	0.96	0.923	0.843	0.85	0.909	0.885	1.098	0.906	0.931	0.934	0.898	0.773	0.861	0.917	0.92
5125-6_3	SL014292	Sialic acid-binding Ig-like lectin 14	SIG14	Q08ET2	100049587	SIGLEC14	Human	RFU	Protein	1	15694.8	15694.8	0.918	PASS	0.928	0.905	0.864	0.855	0.909	0.902	0.961	0.878	0.923	0.931	0.885	0.848	0.907	0.93	0.887
5128-53_3	SL014228	SLAM family member 6	SLAF6	Q96DU3	114836	SLAMF6	Human	RFU	Protein	40	404.9	404.9	1.312	FLAG	2.257	0.985	1.269	0.856	0.905	1.177	0.864	1.118	1.366	0.883	0.925	1.631	1.511	0.857	1.335
5129-12_3	SL005221	Scavenger receptor class F member 1	SREC-I	Q14162	8578	SCARF1	Human	RFU	Protein	1	5896.55	5896.55	1.005	PASS	1.269	1.005	1.086	1.019	0.99	1.022	0.929	0.997	1.051	0.963	0.988	1.003	0.917	1.067	1.136
5130-67_3	SL005222	Scavenger receptor class F member 2	SREC-II	Q96GP6	91179	SCARF2	Human	RFU	Protein	40	270.85	270.85	1.057	FLAG	1.271	1.091	1.217	1.088	1.07	1.168	1.05	1.061	0.994	1.05	1.023	1.684	1.063	1.073	1.216
5131-15_3	SL004863	Tumor necrosis factor receptor superfamily member 19	TAJ	Q9NS68	55504	TNFRSF19	Human	RFU	Protein	40	750.3	750.3	0.613	PASS	0.678	0.713	0.776	0.752	0.854	0.812	0.858	0.834	0.766	0.883	0.717	0.716	0.629	0.756	0.74
5132-71_3	SL005223	Interleukin-27 receptor subunit alpha	TCCR	Q6UWB1	9466	IL27RA	Human	RFU	Protein	1	1181.4	1181.4	1.206	FLAG	1.412	1.112	1.234	1.119	1.025	1.049	1.051	1.022	1.11	1.025	1.121	1.13	1.206	1.158	1.257
5133-17_3	SL002078	TGF-beta receptor type-2	TGF-b R II	P37173	7048	TGFBR2	Human	RFU	Protein	40	1257.3	1257.3	1.138	PASS	1.238	1.085	1.103	1.097	0.982	1.107	1.048	0.984	1.068	1.056	1.099	1.275	1.308	1.075	1.146
5134-52_2	SL007547	Hepatitis A virus cellular receptor 2	TIMD3	Q8TDQ0	84868	HAVCR2	Human	RFU	Protein	40	8260.7	8260.7	0.984	PASS	1.088	0.872	0.893	0.779	0.765	0.827	1.038	0.781	0.887	0.796	0.872	0.791	0.894	0.829	0.971
5138-50_3	SL004366	Tumor necrosis factor receptor superfamily member 12A	TWEAKR	Q9NP84	51330	TNFRSF12A	Human	RFU	Protein	40	159.75	159.75	0.603	PASS	0.627	0.769	0.716	0.772	0.733	0.675	0.768	0.742	0.675	0.73	0.739	0.714	0.663	0.711	0.681
5139-32_3	SL005230	Netrin receptor UNC5C	UNC5H3	O95185	8633	UNC5C	Human	RFU	Protein	1	3217.7	3217.7	1.108	PASS	1.108	1.092	1.077	1.097	1.057	1.139	0.999	1.05	1.143	1.093	1.067	1.155	1.235	1.144	1.191
5140-56_3	SL005231	Netrin receptor UNC5D	UNC5H4	Q6UXZ4	137970	UNC5D	Human	RFU	Protein	40	5280.85	5280.85	0.888	PASS	0.866	0.943	0.927	0.946	0.991	0.991	0.98	0.982	1	1.103	0.95	0.869	0.858	1.059	0.941
5178-5_3	SL011406	High affinity cAMP-specific 3';5'-cyclic phosphodiesterase 7A	PDE7A	Q13946	5150	PDE7A	Human	RFU	Protein	40	404	404	0.93	PASS	1.031	0.945	1.033	0.995	1.073	1.129	0.973	1.087	1.051	1.068	0.97	1.079	1	1.055	0.949
5183-53_3	SL016548	AMP Kinase (alpha1beta1gamma1)	AMPK a1b1g1	Q13131 Q9Y478 P54619	5562 5564 5571	PRKAA1 PRKAB1 PRKAG1	Human	RFU	Protein	40	355.7	355.7	0.772	PASS	0.855	0.944	1.062	1.047	1.115	1.018	1.043	1.084	1.035	1.077	0.942	1.109	0.771	1.033	0.973
5193-51_3	SL002542	GTPase KRas	K-ras	P01116	3845	KRAS	Human	RFU	Protein	40	1286	1286	1.224	PASS	1.115	1.225	1.044	1.334	1.228	1.174	1.186	1.144	1.125	1.305	1.318	1.163	1.255	1.211	1.067
5196-7_3	SL006476	Glycylpeptide N-tetradecanoyltransferase 1	NMT1	P30419	4836	NMT1	Human	RFU	Protein	40	1376.9	1376.9	1.661	FLAG	1.719	1.478	1.753	1.539	1.22	1.316	1.167	1.286	1.458	1.292	1.415	1.841	1.764	1.479	1.502
5201-50_4	SL016554	High affinity cGMP-specific 3';5'-cyclic phosphodiesterase 9A	PDE9A	O76083	5152	PDE9A	Human	RFU	Protein	40	452.15	452.15	0.968	PASS	0.994	0.937	0.836	0.884	0.779	0.746	0.984	0.765	0.838	0.847	0.921	0.761	0.931	0.862	0.9
5202-4_3	SL007373	Peptidyl-prolyl cis-trans isomerase D	PPID	Q08752	5481	PPID	Human	RFU	Protein	40	1933.25	1933.25	1.527	FLAG	1.933	1.398	1.537	1.567	1.658	1.567	1.633	1.739	1.709	1.832	1.487	1.526	1.451	1.638	1.731
5204-13_3	SL005308	Proteasome activator complex subunit 3	PSME3	P61289	10197	PSME3	Human	RFU	Protein	40	275.9	275.9	0.701	PASS	0.734	0.862	0.926	0.963	1.086	0.952	1.048	1.042	0.952	1.047	0.887	0.961	0.705	0.946	0.911
5223-59_3	SL015728	Glucokinase regulatory protein	GCKR	Q14397	2646	GCKR	Human	RFU	Protein	40	394.45	394.45	0.779	PASS	0.825	0.946	0.965	0.979	1.004	0.887	1.015	1.014	0.91	0.981	0.933	0.963	0.784	0.938	0.869
5225-50_3	SL016550	Casein kinase II 2-alpha:2-beta heterotetramer	CK2-A1:B	P68400 P67870	1457 1460	CSNK2A1 CSNK2B	Human	RFU	Protein	40	4262.1	4262.1	0.581	FLAG	0.543	0.598	0.56	0.642	0.53	0.524	0.504	0.574	0.588	0.572	0.584	0.498	0.628	0.589	0.556
5226-36_3	SL016551	Casein kinase II 2-alpha':2-beta heterotetramer	CK2-A2:B	P19784 P67870	1459 1460	CSNK2A2 CSNK2B	Human	RFU	Protein	40	331.6	331.6	0.656	PASS	0.612	0.69	0.643	0.72	0.655	0.642	0.665	0.675	0.665	0.683	0.715	0.622	0.646	0.683	0.655
5227-60_3	SL006921	[Pyruvate dehydrogenase (acetyl-transferring)] kinase isozyme 1; mitochondrial	PDK1	Q15118	5163	PDK1	Human	RFU	Protein	40	1784.25	1784.25	1.238	PASS	1.113	1.26	1.177	1.288	1.026	1.051	1.106	1.047	1.105	1.049	1.269	1.123	1.26	1.193	1.16
5228-25_2	SL006189	Kinesin-like protein KIF23	KIF23	Q02241	9493	KIF23	Human	RFU	Protein	40	627.75	627.75	1.369	FLAG	1.407	1.415	1.322	1.405	1.351	1.401	1.325	1.405	1.393	1.488	1.396	1.215	1.312	1.444	1.328
5229-90_3	SL014735	Inosine-5'-monophosphate dehydrogenase 1	IMDH1	P20839	3614	IMPDH1	Human	RFU	Protein	40	1122.2	1122.2	0.937	PASS	1.036	0.922	0.835	0.881	0.845	0.831	0.817	0.87	0.894	0.891	0.894	0.936	0.95	0.919	0.882
5230-99_3	SL016557	3-hydroxy-3-methylglutaryl-coenzyme A reductase	HMGR	P04035	3156	HMGCR	Human	RFU	Protein	40	335.7	335.7	1.362	FLAG	1.509	1.189	1.307	1.234	1.369	1.259	1.264	1.336	1.415	1.327	1.143	1.737	1.037	1.242	1.236
5231-79_3	SL012707	Proprotein convertase subtilisin/kexin type 9	PCSK9	Q8NBP7	255738	PCSK9	Human	RFU	Protein	0.005	547.4	547.4	1.522	FLAG	1.389	1.506	1.255	1.482	1.433	1.333	1.404	1.296	1.361	1.379	1.591	1.281	1.448	1.303	1.492
5236-2_3	SL007145	Nuclear receptor subfamily 1 group D member 1	NR1D1	P20393	9572	NR1D1	Human	RFU	Protein	40	450.85	450.85	1.126	FLAG	1.131	1.364	1.41	1.451	1.572	1.373	1.522	1.533	1.327	1.515	1.382	1.397	1.082	1.437	1.279
5238-26_3	SL013928	Peptidyl-prolyl cis-trans isomerase E	PPIE	Q9UNP9	10450	PPIE	Human	RFU	Protein	40	656.9	656.9	0.78	PASS	0.775	0.838	0.784	0.852	0.9	0.865	0.9	0.918	0.891	0.95	0.85	0.782	0.73	0.863	0.797
5242-37_3	SL007237	Dual specificity mitogen-activated protein kinase kinase 4	MP2K4	P45985	6416	MAP2K4	Human	RFU	Protein	1	44184.8	44184.8	1.057	PASS	1.131	1.062	1.007	1.13	1.049	0.986	0.995	0.742	0.895	0.899	1.131	1.007	1.138	0.873	0.948
5244-12_3	SL004716	Mitogen-activated protein kinase 9	JNK2	P45984	5601	MAPK9	Human	RFU	Protein	40	930.9	930.9	2.906	FLAG	1.88	3.051	2.597	1.929	3.879	3.493	3.355	4.892	4.497	4.201	4.581	4.406	3.193	4.391	4.224
5245-40_5	SL016549	AMP Kinase (alpha2beta2gamma1)	AMPK a2b2g1	P54646 O43741 P54619	5563 5565 5571	PRKAA2 PRKAB2 PRKAG1	Human	RFU	Protein	40	2519.25	2519.25	1.234	PASS	1.037	1.148	0.996	1.153	1.061	1.114	1.062	1.132	1.15	1.167	1.186	1.074	1.268	1.115	1.068
5246-64_3	SL005730	cGMP-dependent 3';5'-cyclic phosphodiesterase	cGMP-stimulated PDE	O00408	5138	PDE2A	Human	RFU	Protein	1	4620.15	4620.15	3.328	FLAG	3.629	3.421	3.466	3.323	2.856	3.455	2.901	3.141	2.98	3.121	3.628	3.212	4.381	3.334	2.757
5248-68_2	SL005793	Peptidyl-prolyl cis-trans isomerase F; mitochondrial	Cyclophilin F	P30405	10105	PPIF	Human	RFU	Protein	40	3919.85	3919.85	0.262	FLAG	0.24	0.246	0.187	0.255	0.221	0.199	0.19	0.196	0.23	0.204	0.23	0.183	0.273	0.194	0.189
5249-31_3	SL016566	Serine/threonine-protein kinase 17B	DRAK2	O94768	9262	STK17B	Human	RFU	Protein	40	3499.3	3499.3	1.449	FLAG	1.419	1.282	1.245	1.22	1.102	1.364	1.064	1.115	1.263	1.145	1.261	1.151	1.685	1.238	1.375
5250-53_3	SL010928	Inosine-5'-monophosphate dehydrogenase 2	IMDH2	P12268	3615	IMPDH2	Human	RFU	Protein	1	1765.9	1765.9	1.198	PASS	1.039	1.191	1.016	1.234	1.066	1.038	1.041	1.043	0.996	1.129	1.268	0.998	1.231	1.162	1.011
5252-33_3	SL016555	Dual 3';5'-cyclic-AMP and -GMP phosphodiesterase 11A	PDE11	Q9HCR9	50940	PDE11A	Human	RFU	Protein	1	1883.95	1883.95	1.228	PASS	1.046	1.187	1.041	1.15	1.057	0.99	1.103	1.073	1.083	1.095	1.254	1.004	1.163	1.18	1.075
5253-1_2	SL011400	Calcium/calmodulin-dependent 3';5'-cyclic nucleotide phosphodiesterase 1A	PDE1A	P54750	5136	PDE1A	Human	RFU	Protein	40	555.45	555.45	0.629	FLAG	0.616	0.654	0.657	0.701	0.612	0.62	0.612	0.643	0.608	0.662	0.674	0.602	0.652	0.675	0.645
5254-69_3	SL016553	cGMP-inhibited 3';5'-cyclic phosphodiesterase A	PDE3A	Q14432	5139	PDE3A	Human	RFU	Protein	40	761.2	761.2	1.1	PASS	1.088	1.119	1.186	1.134	1.166	1.132	1.146	1.156	1.135	1.196	1.119	1.314	1.057	1.152	1.149
5255-22_3	SL011404	cAMP-specific 3';5'-cyclic phosphodiesterase 4D	PDE4D	Q08499	5144	PDE4D	Human	RFU	Protein	40	1225.45	1225.45	1.233	PASS	1.191	1.208	1.114	1.262	1.104	1.086	1.18	1.195	1.021	1.13	1.352	1.243	1.188	1.26	0.99
5256-86_3	SL011405	cGMP-specific 3';5'-cyclic phosphodiesterase	PDE5A	O76074	8654	PDE5A	Human	RFU	Protein	40	6635.65	6635.65	0.715	FLAG	0.667	0.66	0.586	0.654	0.666	0.616	0.677	0.686	0.693	0.651	0.657	0.627	0.747	0.619	0.611
5259-2_3	SL016567	Mitogen-activated protein kinase kinase kinase 7:TGF-beta-activated kinase 1 and MAP3K7-binding protein 1 fusion	TAK1-TAB1	O43318 Q15750	6885 10454	MAP3K7 TAB1	Human	RFU	Protein	40	1332.55	1332.55	1.754	FLAG	1.748	1.706	1.823	1.766	1.576	1.654	1.559	1.678	1.544	1.659	1.71	1.992	1.966	1.706	1.769
5260-80_3	SL007181	Non-receptor tyrosine-protein kinase TYK2	TYK2	P29597	7297	TYK2	Human	RFU	Protein	1	2115.45	2115.45	0.321	FLAG	0.394	0.352	0.31	0.341	0.325	0.355	0.321	0.31	0.331	0.349	0.383	0.323	0.424	0.31	0.307
5261-13_3	SL010488	Abelson tyrosine-protein kinase 2	ABL2	P42684	27	ABL2	Human	RFU	Protein	40	1552.05	1552.05	1.264	FLAG	1.183	1.244	1.198	1.247	1.139	1.285	1.158	1.142	1.223	1.247	1.29	1.16	1.402	1.27	1.168
5262-57_3	SL014470	Breast cancer anti-estrogen resistance protein 3	BCAR3	O75815	8412	BCAR3	Human	RFU	Protein	40	1520.85	1520.85	1.111	PASS	1.063	1.136	1.063	1.062	1.011	1.065	1.058	1.033	1.07	1.098	1.12	1.03	1.085	1.12	1.065
5264-65_3	SL003520	Calreticulin	calreticulin	P27797	811	CALR	Human	RFU	Protein	40	2347.05	2347.05	1.978	FLAG	1.856	1.964	1.875	1.898	1.835	1.777	1.963	1.795	1.827	1.847	2.045	1.763	1.895	1.961	1.897
5265-12_3	SL005725	GRB2-related adapter protein 2	GRB2-related adapter protein 2	O75791	9402	GRAP2	Human	RFU	Protein	40	580.55	580.55	0.937	PASS	0.955	1.009	1.031	1.026	1.053	0.981	1.055	1.028	0.974	1.072	1.048	1.019	0.919	1.029	0.978
5268-49_3	SL003331	Matrix metalloproteinase-16	MMP-16	P51512	4325	MMP16	Human	RFU	Protein	40	644.8	644.8	1.117	PASS	1.055	1.151	1.05	1.14	1.057	1.034	1.062	1.093	1.104	1.156	1.152	1.038	1.157	1.141	1.068
5271-5_2	SL007310	Ras-related C3 botulinum toxin substrate 3	RAC3	P60763	5881	RAC3	Human	RFU	Protein	40	3551.15	3551.15	0.9	PASS	0.977	0.896	0.736	0.893	0.772	0.713	1.011	0.733	0.766	0.751	0.955	0.715	0.909	0.781	0.797
5272-55_2	SL014469	SHC-transforming protein 1	SHC1	P29353	6464	SHC1	Human	RFU	Protein	40	7047.2	7047.2	0.91	PASS	0.935	0.868	0.933	0.845	0.802	0.842	0.807	0.846	0.875	0.837	0.844	0.882	0.892	0.889	0.905
5275-28_2	SL014488	Proto-oncogene vav	VAV	P15498	7409	VAV1	Human	RFU	Protein	40	5028.5	5028.5	1.114	PASS	1.175	1.069	1.038	1.092	1.01	1.071	1.128	1.092	1.174	1.212	1.115	1.004	1.104	1.181	1.01
5280-68_5	SL016563	Mitochondrial glutamate carrier 2	GHC2	Q9H1K4	83733	SLC25A18	Human	RFU	Protein	40	893.05	893.05	1.921	FLAG	2.019	2.268	2.417	2.424	2.392	2.246	2.41	2.436	2.064	2.441	2.284	2.211	1.859	2.286	2.193
5301-7_3	SL000406	Eotaxin	Eotaxin	P51671	6356	CCL11	Human	RFU	Protein	40	7719.9	7719.9	0.683	PASS	0.617	0.696	0.646	0.658	0.644	0.639	0.684	0.676	0.69	0.697	0.665	0.628	0.713	0.717	0.674
5307-12_3	SL004400	Coagulation factor IXab	Coagulation Factor IXab	P00740	2158	F9	Human	RFU	Protein	0.005	7724.1	7724.1	1.177	PASS	1.07	1.096	0.994	1.12	1.054	1.068	1.008	0.999	1.11	1.106	1.156	1.132	1.294	1.003	1.237
5308-89_2	SL000401	Neutrophil elastase	Elastase	P08246	1991	ELANE	Human	RFU	Protein	40	374.7	374.7	1.253	FLAG	1.259	1.41	1.408	1.455	1.245	1.187	1.32	1.259	1.244	1.301	1.369	1.343	1.229	1.415	1.377
5312-49_3	SL000277	Apolipoprotein E (isoform E2)	Apo E2	P02649	348	APOE	Human	RFU	Protein	0.005	290383	290383	1.255	PASS	1.134	1.204	1.127	1.193	0.956	1.082	0.899	0.957	1.061	0.948	1.182	1.155	1.362	1.142	1.123
5315-22_3	SL000052	Troponin T; cardiac muscle	Troponin T	P45379	7139	TNNT2	Human	RFU	Protein	40	2659.15	2659.15	1.02	PASS	0.988	1.029	0.933	1.013	0.96	1.02	1.079	0.961	1.047	1.022	1.064	0.957	1.024	0.987	0.955
5316-54_3	SL000558	Prothrombin	Prothrombin	P00734	2147	F2	Human	RFU	Protein	0.005	166148	166148	1.27	PASS	1.101	1.109	1.216	1.252	1.001	1.052	0.988	0.886	0.965	0.897	1.079	1.161	1.194	1.128	1.114
5328-33_37	SL016828	Epidermal growth factor receptor variant III	EGFRvIII	P00533		EGFR	Human	RFU	Protein	40	435.35	435.35	1.501	FLAG	1.412	1.085	1.324	0.967	1.061	1.155	0.971	1.238	1.369	0.997	1.028	1.402	1.025	1.003	1.252
5335-73_3	SL003647	Annexin A6	annexin VI	P08133	309	ANXA6	Human	RFU	Protein	40	6959.1	6959.1	0.772	FLAG	0.71	0.751	0.664	0.712	0.51	0.516	0.674	0.542	0.6	0.547	0.745	0.617	0.813	0.626	0.677
5337-64_3	SL004131	T-lymphocyte activation antigen CD86	B7-2	P42081	942	CD86	Human	RFU	Protein	40	1155.6	1155.6	0.634	FLAG	0.656	0.706	0.677	0.673	0.638	0.634	0.719	0.655	0.655	0.674	0.694	0.596	0.681	0.674	0.666
5339-49_3	SL004477	Protein S100-A9	calgranulin B	P06702	6280	S100A9	Human	RFU	Protein	40	3253.35	3253.35	0.635	FLAG	0.628	0.711	0.643	0.732	0.614	0.576	0.717	0.618	0.578	0.663	0.734	0.586	0.732	0.641	0.609
5340-24_3	SL003717	Caspase-10	Caspase-10	Q92851	843	CASP10	Human	RFU	Protein	1	4029.35	4029.35	0.995	PASS	0.93	0.994	0.846	0.956	0.877	0.839	1.008	0.847	0.884	0.914	1.085	0.783	0.961	0.955	0.855
5343-74_3	SL008703	Carboxypeptidase E	CBPE	P16870	1363	CPE	Human	RFU	Protein	40	1975.55	1975.55	1.521	FLAG	1.742	1.351	1.466	1.221	1.18	1.376	1.221	1.216	1.599	1.273	1.301	1.858	1.754	1.332	1.653
5345-51_3	SL006675	Cytoskeleton-associated protein 2	CKAP2	Q8WWK9	26586	CKAP2	Human	RFU	Protein	40	12613.4	12613.4	1.364	FLAG	1.338	1.177	1.065	1.043	0.838	1.025	0.904	0.882	0.978	0.871	1.106	1.365	1.711	0.976	1.081
5346-24_3	SL011808	Copine-1	CPNE1	Q99829	8904	CPNE1	Human	RFU	Protein	1	1609.55	1609.55	1.099	PASS	1.093	1.04	1.037	1.079	1.026	0.953	0.962	1.025	1.043	1.009	1.048	0.988	1.031	1.088	1.056
5347-59_3	SL000130	G2/mitotic-specific cyclin-B1	Cyclin B1	P14635	891	CCNB1	Human	RFU	Protein	40	391.7	391.7	1.191	FLAG	1.339	1.037	1.287	1.171	1.164	1.12	1.109	1.171	1.068	1.128	1.028	1.551	1.104	1.144	1.279
5349-69_3	SL006970	Delta-like protein 1	DLL1	O00548	28514	DLL1	Human	RFU	Protein	1	1815.6	1815.6	1.028	PASS	0.992	1.069	1.03	1.037	0.956	0.92	1.045	0.958	0.929	0.997	1.074	0.962	1.023	1.113	1.035
5350-14_2	SL012881	Glypican-6	GPC6	Q9Y625	10082	GPC6	Human	RFU	Protein	1	1597.15	1597.15	1.279	FLAG	1.137	1.282	1.071	1.29	1.188	1.116	1.28	1.184	1.201	1.209	1.436	1.058	1.259	1.315	1.022
5351-52_3	SL004891	Heterogeneous nuclear ribonucleoproteins A2/B1	hnRNP A2/B1	P22626	3181	HNRNPA2B1	Human	RFU	Protein	1	2240.3	2240.3	0.895	PASS	0.897	0.94	0.87	0.858	0.875	0.807	0.992	0.844	0.864	0.842	0.911	0.777	0.836	0.899	0.857
5352-11_3	SL004145	Tumor necrosis factor receptor superfamily member 14	HVEM	Q92956	8764	TNFRSF14	Human	RFU	Protein	40	556	556	1.161	FLAG	1.239	1.118	1.276	1.158	1.174	1.097	1.19	1.143	1.153	1.115	1.142	1.494	1.025	1.142	1.181
5353-89_2	SL001990	Interleukin-1 receptor antagonist protein	IL-1Ra	P18510	3557	IL1RN	Human	RFU	Protein	40	2862.5	2862.5	1.125	PASS	1.202	1.092	1.002	0.958	0.814	0.845	0.99	0.862	0.946	0.877	1.086	0.879	1.12	1.011	0.959
5354-11_3	SL000655	Keratin; type I cytoskeletal 18	Keratin 18	P05783	3875	KRT18	Human	RFU	Protein	40	768.4	768.4	1.097	PASS	1.062	1.165	1.169	1.174	1.124	1.106	1.206	1.142	1.055	1.177	1.165	1.115	1.102	1.158	1.129
5355-69_3	SL004648	Tumor necrosis factor ligand superfamily member 14	LIGHT	O43557	8740	TNFSF14	Human	RFU	Protein	40	511.65	511.65	0.802	PASS	0.841	0.874	0.896	0.889	0.884	0.833	0.899	0.882	0.83	0.877	0.869	0.893	0.844	0.888	0.841
5356-2_3	SL003080	Macrophage migration inhibitory factor	MIF	P14174	4282	MIF	Human	RFU	Protein	1	755.95	755.95	0.611	FLAG	0.573	0.66	0.617	0.7	0.689	0.608	0.669	0.619	0.649	0.663	0.718	0.586	0.575	0.681	0.605
5357-60_3	SL014113	Neuroligin-4; X-linked	NLGNX	Q8N0W4	57502	NLGN4X	Human	RFU	Protein	40	587.05	587.05	1.012	PASS	0.916	1.07	1.009	1.05	0.973	0.958	0.973	1	0.948	1.03	1.043	0.961	1.032	1.055	0.975
5358-3_3	SL008574	Osteomodulin	OMD	Q99983	4958	OMD	Human	RFU	Protein	1	7852.35	7852.35	0.985	PASS	0.931	0.983	0.851	0.976	1.024	0.961	0.963	1.001	1.031	1.046	1.025	0.877	0.99	0.995	0.904
5359-65_3	SL002702	Serine/threonine-protein kinase pim-1	PIM1	P11309	5292	PIM1	Human	RFU	Protein	40	763.75	763.75	0.826	PASS	0.877	0.952	1.069	1.051	1.146	1.02	1.137	1.078	0.992	1.101	0.99	1.074	0.832	1.046	0.962
5360-9_2	SL003722	RAC-beta serine/threonine-protein kinase	PKB beta	P31751	208	AKT2	Human	RFU	Protein	40	6422.7	6422.7	0.626	FLAG	0.556	0.635	0.517	0.616	0.538	0.538	0.581	0.595	0.582	0.584	0.636	0.521	0.628	0.625	0.569
5363-51_3	SL010470	Semaphorin-3E	Semaphorin 3E	O15041	9723	SEMA3E	Human	RFU	Protein	40	2195.25	2195.25	0.981	PASS	0.895	1.039	1.021	1.063	1.027	0.993	1.029	1.034	0.964	1.094	1.054	0.948	0.912	1.098	0.996
5364-7_3	SL007336	Protein SET	SET	Q01105	6418	SET	Human	RFU	Protein	0.005	646	646	1.051	PASS	0.92	0.996	0.827	0.992	0.969	0.921	1.132	0.815	1.048	0.962	1.111	0.773	1.056	0.874	0.944
5383-14_3	SL004671	Tumor necrosis factor receptor superfamily member 13C	BAFF Receptor	Q96RJ3	115650	TNFRSF13C	Human	RFU	Protein	40	3191.45	3191.45	1.324	FLAG	1.22	1.279	1.11	1.196	1.234	1.213	1.429	1.067	1.257	1.162	1.276	1.167	1.227	1.127	1.245
5384-67_3	SL016130	Transcription factor IIIB 90 kDa subunit	BRF-1	Q92994	2972	BRF1	Human	RFU	Protein	40	1566.05	1566.05	1.049	PASS	0.992	1.193	1.133	1.217	1.211	1.203	1.249	1.181	1.108	1.188	1.191	1.059	1.05	1.121	0.993
5392-73_2	SL002731	Tumor necrosis factor receptor superfamily member 6	Fas; soluble	P25445	355	FAS	Human	RFU	Protein	1	1524.7	1524.7	0.976	PASS	0.952	1.039	1.05	1.131	0.855	0.851	0.88	0.891	0.892	0.907	1.099	0.977	0.995	1.115	1.047
5400-52_3	SL003184	Leptin receptor	sLeptin R	P48357	3953	LEPR	Human	RFU	Protein	1	2108.5	2108.5	1.163	PASS	1.337	1.101	1.051	1.102	1.109	1.13	1.055	1.079	1.232	1.158	1.178	1.204	1.204	1.116	1.043
5404-53_3	SL004871	Tumor necrosis factor receptor superfamily member 21	DR6	O75509	27242	TNFRSF21	Human	RFU	Protein	1	7318.05	7318.05	0.948	PASS	1.016	0.941	1.059	0.943	0.942	0.953	0.967	0.957	0.961	0.975	0.92	0.949	0.942	1.038	1.115
5410-53_3	SL007295	Cadherin-15	CAD15	P55291	1013	CDH15	Human	RFU	Protein	40	3649.15	3649.15	0.759	FLAG	0.895	0.673	0.712	0.634	0.558	0.737	0.534	0.574	0.725	0.564	0.67	0.745	0.937	0.672	0.73
5412-53_3	SL004134	CD27 antigen	CD27	P26842	939	CD27	Human	RFU	Protein	0.005	6137.75	6137.75	0.957	FLAG	1.148	1.376	1.112	1.242	1.276	1.374	1.248	0.935	1.108	1.296	1.375	1.038	1.657	0.81	0.734
5424-55_3	SL003690	Tumor necrosis factor receptor superfamily member 11A	RANK	Q9Y6Q6	8792	TNFRSF11A	Human	RFU	Protein	40	1118.2	1118.2	1.055	PASS	1.076	1.079	1.104	1.033	1.071	1.237	1.023	1.069	1.154	1.06	1.059	1.24	1.22	1.063	1.217
5430-66_3	SL008967	Tyrosine-protein phosphatase non-receptor type substrate 1	SHPS1	P78324	140885	SIRPA	Human	RFU	Protein	40	5555.1	5555.1	0.643	FLAG	0.607	0.714	0.576	0.669	0.609	0.602	0.79	0.631	0.621	0.658	0.701	0.571	0.759	0.654	0.627
5437-63_3	SL001774	Fatty acid-binding protein; heart	FABP	P05413	2170	FABP3	Human	RFU	Rat Protein	1	14606.1	14606.1	0.81	PASS	0.857	0.805	0.901	0.756	0.885	0.853	1.008	0.884	0.882	0.888	0.787	0.776	0.705	0.906	0.936
5440-26_3	SL004594	Troponin I; fast skeletal muscle	Troponin I; skeletal; fast twitch	P48788	7136	TNNI2	Human	RFU	Rat Protein	40	8356.8	8356.8	0.96	PASS	0.982	0.922	0.853	0.879	0.818	0.794	0.939	0.806	0.887	0.843	0.894	0.792	0.965	0.885	0.943
5441-67_3	SL001761	Troponin I; cardiac muscle	Troponin I	P19429	7137	TNNI3	Human	RFU	Rat Protein	40	453.45	453.45	0.818	PASS	0.873	0.975	1.004	1.01	1.137	0.981	1.12	1.071	0.972	1.092	0.999	1.007	0.746	1.067	0.997
5443-62_2	SL002505	Atrial natriuretic factor	ANP	P01160	4878	NPPA	Human	RFU	Rat Protein	40	584.95	584.95	0.689	PASS	0.751	0.873	0.887	0.911	0.94	0.846	0.93	0.942	0.831	0.932	0.874	0.892	0.68	0.922	0.817
5451-1_3	SL003166	CD166 antigen	ALCAM	Q13740	214	ALCAM	Human	RFU	Protein	1	15794.9	15794.9	0.963	PASS	0.962	0.971	0.945	0.954	0.957	0.93	1.11	0.908	0.926	0.949	0.962	0.836	0.979	0.945	1
5452-71_3	SL008835	Asialoglycoprotein receptor 1	ASGR1	P07306	432	ASGR1	Human	RFU	Protein	40	944	944	0.623	FLAG	0.686	0.643	0.561	0.611	0.55	0.502	0.598	0.541	0.499	0.533	0.628	0.537	0.78	0.509	0.535
5456-59_2	SL006694	Beta-Ala-His dipeptidase	CNDP1	Q96KN2	84735	CNDP1	Human	RFU	Protein	0.005	7095	7095	1.515	FLAG	1.248	1.387	1.455	1.397	1.252	1.247	1.098	1.217	1.224	1.428	1.36	1.172	1.426	1.414	1.515
5457-5_2	SL007471	Collectin-12	COLEC12	Q5KU26	81035	COLEC12	Human	RFU	Protein	40	2491	2491	1.352	FLAG	1.221	1.361	1.296	1.32	1.292	1.328	1.281	1.299	1.42	1.416	1.35	1.186	1.217	1.389	1.284
5459-33_3	SL010456	Cystatin-SN	CYTN	P01037	1469	CST1	Human	RFU	Protein	1	1530.85	1530.85	0.635	FLAG	0.685	0.593	0.538	0.596	0.626	0.601	0.839	0.551	0.638	0.568	0.645	0.61	0.691	0.522	0.663
5460-60_3	SL004750	ATP-dependent RNA helicase DDX19B	DEAD-box protein 19B	Q9UMR2	11269	DDX19B	Human	RFU	Protein	40	1750.45	1750.45	1.029	PASS	1.05	1.03	1.034	1.014	0.933	0.903	0.902	0.901	0.901	0.942	1.006	1.013	1.093	0.998	1.033
5462-62_3	SL002086	Ficolin-3	Ficolin-3	O75636	8547	FCN3	Human	RFU	Protein	0.005	4719.4	4719.4	1.9	FLAG	1.002	1.852	1.264	0.967	0.738	1.551	0.794	1.317	1.754	1.07	1.125	1.267	1.864	1.417	0.899
5463-22_3	SL000658	Growth arrest-specific protein 1	GAS1	P54826	2619	GAS1	Human	RFU	Protein	1	639.5	639.5	0.853	PASS	0.89	0.89	0.856	0.807	0.825	0.798	0.938	0.827	0.826	0.835	0.849	0.767	0.807	0.883	0.854
5464-52_3	SL003792	Growth factor receptor-bound protein 2	GRB2 adapter protein	P62993	2885	GRB2	Human	RFU	Protein	40	14857.5	14857.5	0.614	FLAG	0.626	0.616	0.624	0.624	0.619	0.603	0.652	0.65	0.618	0.657	0.611	0.57	0.564	0.65	0.611
5465-32_3	SL014129	Heparan-sulfate 6-O-sulfotransferase 1	H6ST1	O60243	9394	HS6ST1	Human	RFU	Protein	1	2573.5	2573.5	1.069	PASS	1.029	1.108	1.079	1.106	1.025	0.977	0.969	1.06	1.023	1.095	1.09	0.985	1.031	1.189	1.058
5467-15_3	SL000454	Heat shock protein HSP 90-beta	HSP 90b	P08238	3326	HSP90AB1	Human	RFU	Protein	1	24329.8	24329.8	1.105	PASS	1.209	1.027	1.104	1.077	0.935	0.962	0.854	1.001	1.014	0.939	0.985	1.059	1.14	1.067	1.116
5468-67_3	SL011068	Interleukin-17 receptor C	IL-17 RC	Q8NAC3	84818	IL17RC	Human	RFU	Protein	40	841.4	841.4	0.845	PASS	0.916	0.92	0.761	0.86	0.74	0.723	0.874	0.783	0.856	0.757	0.873	0.813	0.906	0.833	0.845
5470-69_2	SL010328	Mediator of RNA polymerase II transcription subunit 1	MED-1	Q15648	5469	MED1	Human	RFU	Protein	1	76348.6	76348.6	1.384	FLAG	1.271	1.25	1.133	1.216	1.001	0.989	0.976	0.894	1.12	0.914	1.237	1.097	1.449	1.117	1.127
5475-10_3	SL000553	Protein kinase C beta type (splice variant beta-II)	PKC-B-II	P05771	5579	PRKCB	Human	RFU	Protein	1	2667.25	2667.25	1.397	FLAG	1.305	1.371	1.314	1.421	1.269	1.208	1.189	1.379	1.375	1.403	1.428	1.234	1.338	1.426	1.306
5476-66_3	SL000556	Protein kinase C gamma type	PKC-G	P05129	5582	PRKCG	Human	RFU	Protein	40	482.7	482.7	1.385	FLAG	1.447	1.596	1.653	1.604	1.789	1.602	1.759	1.778	1.562	1.798	1.57	1.561	1.266	1.72	1.568
5478-50_2	SL000158	Glutamate carboxypeptidase 2	PSMA	Q04609	2346	FOLH1	Human	RFU	Protein	40	905.5	905.5	1.484	FLAG	1.356	1.512	1.26	1.362	1.267	1.266	1.355	1.212	1.332	1.346	1.507	1.171	1.401	1.422	1.342
5480-49_3	SL000563	C-C motif chemokine 5	RANTES	P13501	6352	CCL5	Human	RFU	Protein	1	47893.6	47893.6	1.349	FLAG	1.416	1.189	1.426	1.101	0.985	1.065	0.978	1.054	1.206	0.933	1.049	1.322	1.229	1.164	1.412
5481-16_3	SL013754	Ras GTPase-activating protein 1	RASA1	P20936	5921	RASA1	Human	RFU	Protein	40	1121.45	1121.45	1.011	PASS	0.883	0.993	0.867	0.962	0.725	0.725	0.745	0.709	0.757	0.734	0.957	0.817	0.987	0.872	0.874
5482-61_3	SL000566	Retinol-binding protein 4	RBP	P02753	5950	RBP4	Human	RFU	Protein	0.005	245.05	245.05	1.056	FLAG	1.035	1.056	1.044	1.106	1.031	1.045	1.478	0.991	0.974	1.083	1.335	0.946	0.966	1.034	0.951
5483-1_3	SL010467	Repulsive guidance molecule A	RGMA	Q96B86	56963	RGMA	Human	RFU	Protein	1	18918.9	18918.9	1.785	FLAG	2.384	1.306	1.561	1.139	1.242	1.699	1.105	1.244	1.83	1.085	1.168	1.563	2.176	1.225	1.782
5484-63_3	SL011588	40S ribosomal protein S3a	RS3A	P61247	6189	RPS3A	Human	RFU	Protein	40	1210.6	1210.6	1.263	PASS	1.298	1.335	1.322	1.381	1.307	1.216	1.312	1.283	1.286	1.357	1.371	1.393	1.239	1.34	1.351
5486-73_3	SL003177	Intercellular adhesion molecule 2	sICAM-2	P13598	3384	ICAM2	Human	RFU	Protein	1	1351.5	1351.5	1.14	PASS	1.079	1.117	1.004	1.08	1.009	0.912	1.206	0.969	0.946	1.012	1.182	0.98	1.193	1.104	1.039
5487-7_3	SL016928	SLAM family member 7	SLAF7	Q9NQ25	57823	SLAMF7	Human	RFU	Protein	40	45310.6	45310.6	1.034	PASS	1.008	1.004	0.927	1.013	0.81	0.834	0.894	0.826	0.948	0.837	0.959	1.014	1.115	0.955	0.991
5488-74_3	SL010516	Proto-oncogene tyrosine-protein kinase Src	SRCN1	P12931	6714	SRC	Human	RFU	Protein	40	17605.1	17605.1	0.884	PASS	0.97	0.826	0.813	0.853	0.829	0.811	0.89	0.86	0.92	0.885	0.876	0.745	0.854	0.911	0.981
5489-18_3	SL010250	Stress-induced-phosphoprotein 1	Stress-induced-phosphoprotein 1	P31948	10963	STIP1	Human	RFU	Protein	1	4988.65	4988.65	1.234	FLAG	1.169	1.397	1.289	1.424	1.104	1.127	1.044	1.214	1.108	1.213	1.297	1.176	1.29	1.314	1.147
5490-53_3	SL010384	Testican-1	Testican-1	Q08629	6695	SPOCK1	Human	RFU	Protein	1	1955.55	1955.55	1.223	PASS	1.179	1.209	0.984	1.226	1.176	1.017	1.318	1.065	1.123	1.188	1.366	1.019	1.287	1.236	1.025
5491-12_3	SL010471	Testican-2	Testican-2	Q92563	9806	SPOCK2	Human	RFU	Protein	1	848.7	848.7	1.019	PASS	1.03	1.012	1.03	1.067	1.049	1.005	0.996	1.021	1.046	1.076	1.016	1.04	1.002	1.11	1.079
5493-17_3	SL010524	Serine/threonine-protein kinase WNK3	WNK3	Q9BYP7	65267	WNK3	Human	RFU	Protein	1	818.5	818.5	1.161	PASS	1.077	1.204	1.166	1.201	1.071	1.064	1.022	1.145	1.106	1.161	1.195	1.02	1.097	1.273	1.136
5494-52_3	SL009790	Small nuclear ribonucleoprotein F	RUXF	P62306	6636	SNRPF	Human	RFU	Protein	40	2360.65	2360.65	1.421	FLAG	1.667	1.386	1.278	1.329	1.183	1.186	1.301	1.109	1.289	1.242	1.392	1.304	1.394	1.278	1.348
5508-62_3	SL000344	Cathepsin D	Cathepsin D	P07339	1509	CTSD	Human	RFU	Protein	0.005	610.25	610.25	1.047	PASS	0.941	0.77	0.839	1.052	1.063	1.062	0.964	0.998	1.11	0.841	1.057	1.3	1.186	1.189	1.226
5509-7_3	SL000084	Epidermal growth factor	EGF	P01133	1950	EGF	Human	RFU	Protein	1	719.5	719.5	1.111	PASS	1.068	1.067	1.136	1.045	1.208	1.07	0.841	1.056	1.236	1.326	0.993	0.947	1.236	1.015	1.316
5526-53_3	SL004859	Tumor necrosis factor receptor superfamily member 18	GITR	Q9Y5U5	8784	TNFRSF18	Human	RFU	Protein	40	830.35	830.35	0.748	PASS	0.698	0.815	0.734	0.85	0.681	0.672	0.812	0.747	0.704	0.746	0.867	0.726	0.754	0.814	0.738
5532-53_3	SL003060	Fibroblast growth factor receptor 1	bFGF-R	P11362	2260	FGFR1	Human	RFU	Protein	0.005	717.55	717.55	0.866	PASS	0.927	0.794	0.843	0.734	0.859	0.932	0.828	0.913	1	0.882	0.789	0.817	0.921	0.768	1.052
5534-49_2	SL004157	Tumor necrosis factor receptor superfamily member 10B	TRAIL R2	O14763	8795	TNFRSF10B	Human	RFU	Protein	40	331.4	331.4	1.133	PASS	1.072	1.228	1.151	1.13	1.216	1.134	1.194	1.159	1.142	1.224	1.221	1.21	1.098	1.211	1.103
5542-22_2	SL006397	Neuropilin-1	NRP1	O14786	8829	NRP1	Human	RFU	Protein	0.005	2381.95	2381.95	2.153	FLAG	1.635	1.953	1.38	1.775	1.507	1.525	1.234	1.356	1.732	1.556	2.308	1.582	2.522	1.612	1.795
5792-8_2	SL000011	alpha-Fetoprotein	AFP	P02771	174	AFP	Human	RFU	Protein	40	591.4	591.4	1.141	PASS	0.985	1.201	1.032	1.163	0.969	0.979	1.102	1.04	1.036	1.086	1.2	0.937	1.077	1.15	1.051
5798-3_3	SL003704	BH3-interacting domain death agonist	BID	P55957	637	BID	Human	RFU	Protein	40	1067.65	1067.65	0.716	PASS	0.698	0.767	0.668	0.732	0.752	0.711	0.798	0.759	0.715	0.752	0.754	0.638	0.667	0.744	0.732
5801-72_3	SL000305	beta-nerve growth factor	b-NGF	P01138	4803	NGF	Human	RFU	Protein	40	1410.2	1410.2	1.163	PASS	0.976	1.093	0.971	1.042	0.949	0.972	0.956	0.971	1.007	1.016	1.103	0.925	1.08	1.11	1.051
5803-24_3	SL003362	Complement C3d fragment	C3d	P01024	718	C3	Human	RFU	Protein	0.005	9618.7	9618.7	1.03	FLAG	0.817	1.09	0.722	0.793	0.572	0.857	0.496	0.732	0.857	0.705	0.905	1.251	1.535	0.734	0.946
5807-77_3	SL007195	CD70 antigen	CD70	P32970	970	CD70	Human	RFU	Protein	40	289.85	289.85	0.333	FLAG	0.363	0.394	0.455	0.448	0.437	0.406	0.412	0.427	0.376	0.422	0.396	0.453	0.334	0.415	0.386
5810-25_3	SL005155	Teratocarcinoma-derived growth factor 1	Cripto	P13385	6997	TDGF1	Human	RFU	Protein	40	1228.5	1228.5	0.701	PASS	1.244	0.695	0.788	0.654	0.631	0.672	0.704	0.759	0.696	0.633	0.628	0.888	0.907	0.655	0.916
5813-58_3	SL000408	Erythropoietin	Epo	P01588	2056	EPO	Human	RFU	Protein	40	1159.6	1159.6	0.759	PASS	0.82	0.859	0.881	0.819	0.862	0.886	0.962	0.93	0.859	0.913	0.799	0.794	0.787	0.862	0.887
5822-22_3	SL004248	Glial cell line-derived neurotrophic factor	GDNF	P39905	2668	GDNF	Human	RFU	Protein	40	327.2	327.2	0.56	FLAG	0.657	0.733	0.92	0.865	1.045	0.873	0.914	1.012	0.808	0.94	0.728	0.929	0.539	0.834	0.78
5825-49_3	SL000458	Interferon gamma receptor 1	IFN-g R1	P15260	3459	IFNGR1	Human	RFU	Protein	40	408.6	408.6	0.563	FLAG	0.593	0.686	0.637	0.689	0.72	0.672	0.74	0.735	0.662	0.719	0.69	0.607	0.59	0.698	0.64
5834-18_3	SL000485	Interleukin-9	IL-9	P15248	3578	IL9	Human	RFU	Protein	40	237.85	237.85	0.614	PASS	0.77	0.762	0.878	0.848	0.955	0.87	0.907	0.953	0.827	0.904	0.779	0.875	0.636	0.827	0.826
5837-49_3	SL004714	Leukemia inhibitory factor receptor	LIF sR	P42702	3977	LIFR	Human	RFU	Protein	40	4527	4527	1.74	FLAG	1.458	1.646	1.377	1.631	1.544	1.587	1.448	1.504	1.565	1.709	1.805	1.385	1.622	1.606	1.438
5843-60_3	SL003542	Histone-lysine N-methyltransferase EHMT2	NG36	Q96KQ7	10919	EHMT2	Human	RFU	Protein	1	561.2	561.2	1.364	FLAG	1.494	1.26	1.171	1.249	1.154	1.189	1.137	0.967	1.118	1.02	1.373	1.742	1.369	1.055	1.177
5846-24_3	SL004683	Noggin	Noggin	Q13253	9241	NOG	Human	RFU	Protein	40	3929	3929	0.99	PASS	0.966	1.038	0.957	1.006	0.939	0.967	0.981	1.008	0.993	1.023	1.04	0.913	0.939	1.062	1.007
5852-6_3	SL004783	Protein S100-A12	S100A12	P80511	6283	S100A12	Human	RFU	Protein	1	685.45	685.45	1.113	PASS	0.975	1.182	1.075	1.109	0.986	0.957	1.023	0.971	0.987	0.958	1.145	1.022	1.113	1.049	1.072
5854-60_3	SL004230	Microtubule-associated protein tau	tau	P10636	4137	MAPT	Human	RFU	Protein	40	174.55	174.55	0.741	PASS	0.867	0.878	1.052	0.975	1.07	0.928	0.982	1.06	0.897	1.013	0.886	1.061	0.717	0.968	0.971
5858-6_5	SL005688	14-3-3 protein zeta/delta	14-3-3 protein zeta/delta	P63104	7534	YWHAZ	Human	RFU	Protein	1	80388.6	80388.6	0.998	PASS	0.99	0.914	1.014	0.995	0.88	0.861	0.831	0.903	0.969	0.843	0.843	0.824	0.891	0.974	0.895
5861-78_3	SL008466	3-hydroxyanthranilate 3;4-dioxygenase	3HAO	P46952	23498	HAAO	Human	RFU	Protein	1	4463	4463	1.986	FLAG	2.278	1.315	1.23	1.204	1.013	0.948	1.139	0.864	1.596	0.836	1.391	1.779	2.08	0.996	1.669
5864-10_3	SL004910	Fructose-bisphosphate aldolase A	aldolase A	P04075	226	ALDOA	Human	RFU	Protein	1	53395.9	53395.9	1.216	PASS	1.322	1.102	1.178	1.114	1.057	1.139	0.893	1.027	1.195	0.984	1.038	1.071	1.224	1.103	1.146
5867-60_3	SL008008	Arginase-1	ARGI1	P05089	383	ARG1	Human	RFU	Protein	40	1270.1	1270.1	0.819	PASS	0.757	0.952	0.815	0.901	0.808	0.805	0.847	0.824	0.777	0.835	0.887	0.756	0.917	0.838	0.784
5870-23_2	SL003700	Bcl2-associated agonist of cell death	BAD	Q92934	572	BAD	Human	RFU	Protein	40	4152.05	4152.05	1.397	FLAG	1.41	1.268	1.152	1.126	1.036	1.134	0.981	1.14	1.211	1.143	1.206	1.244	1.337	1.222	1.293
5879-51_3	SL009207	Dynactin subunit 2	Dynactin subunit 2	Q13561	10540	DCTN2	Human	RFU	Protein	1	1143.5	1143.5	0.849	PASS	0.848	0.812	0.74	0.762	0.706	0.695	0.797	0.704	0.776	0.706	0.845	0.726	0.87	0.756	0.774
5882-34_2	SL005685	Elongation factor 1-beta	EF-1-beta	P24534	1933	EEF1B2	Human	RFU	Protein	40	425.55	425.55	1.274	PASS	1.052	1.23	0.987	1.033	1.085	1.076	1.112	1.088	1.141	1.224	1.209	1.096	0.999	1.104	1.321
5885-55_3	SL004924	Eukaryotic translation initiation factor 4H	eIF-4H	Q15056	7458	EIF4H	Human	RFU	Protein	40	1957.3	1957.3	0.479	FLAG	0.505	0.562	0.507	0.533	0.492	0.485	0.529	0.5	0.489	0.484	0.506	0.481	0.568	0.485	0.514
5888-29_3	SL005687	Eukaryotic translation initiation factor 5A-1	eIF-5A-1	P63241	1984	EIF5A	Human	RFU	Protein	40	20238.7	20238.7	1.266	PASS	1.382	1.004	1.204	0.983	1.023	1.15	1	1.066	1.208	1.062	1.059	1.088	1.142	1.086	1.204
5897-58_3	SL002071	Gastrin-releasing peptide	Gastrin-releasing peptide	P07492	2922	GRP	Human	RFU	Protein	40	383.75	383.75	0.821	PASS	0.925	0.914	1.061	0.988	1.042	1.054	0.965	1.068	0.952	0.994	0.891	1.054	0.862	0.95	1.082
5900-11_2	SL009431	Histidine triad nucleotide-binding protein 1	HINT1	P49773	3094	HINT1	Human	RFU	Protein	40	1401.95	1401.95	0.883	PASS	0.845	0.934	0.835	0.863	0.885	0.879	0.989	0.897	0.926	0.962	0.924	0.774	0.887	0.902	0.841
5903-91_2	SL004899	Heat shock cognate 71 kDa protein	HSP70 protein 8	P11142	3312	HSPA8	Human	RFU	Protein	1	1284.4	1284.4	1.63	FLAG	1.628	1.453	1.321	1.409	1.074	1.119	1.115	1.129	1.244	1.138	1.526	1.473	1.594	1.32	1.293
5909-51_3	SL003687	Nucleoside diphosphate kinase A	Nucleoside diphosphate kinase A	P15531	4830	NME1	Human	RFU	Protein	1	597.7	597.7	0.969	PASS	0.898	0.986	0.842	0.966	0.922	0.862	0.972	0.915	0.919	0.935	1.022	0.871	0.941	0.97	0.881
5915-58_3	SL012148	Peroxisomal targeting signal 1 receptor	PEX5	P50542	5830	PEX5	Human	RFU	Protein	40	353.9	353.9	1.121	PASS	1.051	1.141	0.969	1.045	0.997	0.95	1.011	1.007	0.902	0.996	1.133	1.163	1.069	1.076	0.993
5918-5_3	SL008176	Proteasome activator complex subunit 1	PSME1	Q06323	5720	PSME1	Human	RFU	Protein	1	923.05	923.05	0.952	PASS	0.856	0.984	0.832	0.922	0.936	0.78	1.09	0.871	0.877	0.903	1.073	0.811	0.873	0.932	0.885
5921-58_3	SL004829	Protein S100-A7	S100A7	P31151	6278	S100A7	Human	RFU	Protein	40	345.35	345.35	0.931	PASS	0.871	1.034	0.969	1.008	0.947	0.88	0.975	0.936	0.876	0.963	1.019	0.98	0.916	0.994	0.969
5927-4_3	SL004690	WNT1-inducible-signaling pathway protein 3	WISP-3	O95389	8838	WISP3	Human	RFU	Protein	40	2104.8	2104.8	2.392	FLAG	2.587	2.006	1.876	1.801	1.672	1.835	1.781	1.776	1.929	1.802	2.034	2.363	2.106	2.011	1.915
5934-1_3	SL000420	Ferritin	Ferritin	P02794 P02792	2495 2512	FTH1 FTL	Human	RFU	Protein	1	11023.5	11023.5	1.374	FLAG	1.352	1.205	1.372	1.259	1.164	1.244	0.961	1.162	1.28	1.103	1.285	1.277	1.337	1.239	1.534
5936-53_3	SL002517	Tumor necrosis factor	TNF-a	P01375	7124	TNF	Human	RFU	Protein	40	492.6	492.6	0.851	PASS	1.05	0.913	1.084	1.015	1.088	1.014	1.091	1.063	0.992	1.063	0.925	1.282	0.815	0.99	1.085
5939-42_3	SL004365	Tumor necrosis factor ligand superfamily member 12	TWEAK	O43508	8742	TNFSF12	Human	RFU	Protein	40	638.5	638.5	0.856	PASS	0.813	0.895	0.893	0.88	0.782	0.774	0.799	0.824	0.807	0.84	0.876	0.907	0.921	0.891	0.884
5947-90_3	SL000598	Thrombopoietin	Tpo	P40225	7066	THPO	Human	RFU	Protein	40	144.3	144.3	0.598	FLAG	0.627	0.765	0.785	0.812	0.92	0.812	0.878	0.935	0.797	0.902	0.745	0.715	0.594	0.819	0.753
5954-62_3	SL003970	Parathyroid hormone	PTH	P01270	5741	PTH	Human	RFU	Protein	40	2819	2819	1.94	FLAG	2.882	1.29	1.707	1.103	0.978	1.236	1.017	0.944	1.41	0.979	1.17	2.069	1.668	1.116	1.681
5957-30_3	SL011510	Somatostatin-28	Somatostatin-28	P61278	6750	SST	Human	RFU	Protein	40	1111.35	1111.35	1.043	PASS	0.967	1.031	0.991	1.057	0.909	0.892	1.051	0.934	0.987	0.988	1.073	0.962	0.958	0.985	1.075
6151-18_3	SL007242	Dual specificity mitogen-activated protein kinase kinase 3	MP2K3	P46734	5606	MAP2K3	Human	RFU	Protein	40	1287	1287	0.898	PASS	0.84	1.031	0.939	1.083	0.87	0.891	0.907	0.947	0.864	0.988	1.042	0.901	0.933	1.002	0.896
6152-111_3	SL000074	Cellular tumor antigen p53	p53	P04637	7157	TP53	Human	RFU	Protein	1	833.7	833.7	1.234	PASS	1.157	1.207	1.114	1.243	1.011	1.079	1.039	0.998	1.002	1.004	1.277	1.253	1.292	1.116	1.034
6641-60_3	SL017289	PolyUbiquitin K48-linked	PolyUbiquitin K48	P0CG47	7314	UBB	Human	RFU	Protein	1	1648.45	1648.45	1.639	FLAG	1.451	1.407	1.248	1.429	1.267	1.336	1.192	1.16	1.293	1.342	1.42	1.242	1.665	1.313	1.397
6647-55_3	SL017290	PolyUbiquitin K63-linked	PolyUbiquitin K63	P0CG48	7316	UBC	Human	RFU	Protein	40	4118	4118	1.141	PASS	1.153	1.137	0.954	1.101	0.982	0.975	1.037	0.945	0.998	1.003	1.113	1.139	1.323	1.045	1.124
6649-51_3	SL012395	Netrin-1	NET1	O95631	9423	NTN1	Human	RFU	Protein	40	371.85	371.85	0.774	PASS	0.794	0.84	0.915	0.905	1.036	0.997	0.939	0.995	1.005	1.049	0.885	0.943	0.797	0.929	0.908
6653-58_3	SL004838	Leukocyte surface antigen CD47	CD47	Q08722	961	CD47	Human	RFU	Protein	40	504.15	504.15	0.827	PASS	0.943	0.903	0.927	0.944	1.004	0.97	0.931	0.979	0.955	0.969	0.906	0.946	0.844	0.901	0.884
7624-19_3	SL014896	Ankyrin-2	ANK2	Q01484	287	ANK2	Human	RFU	Protein	40	446.4	446.4	0.857	PASS	0.856	0.964	1.059	1.038	1.071	0.972	1.035	1.056	0.998	1.053	0.979	1.042	0.801	1.026	1.045
7625-27_3	SL008071	14-3-3 protein theta	14-3-3 protein theta	P27348	10971	YWHAQ	Human	RFU	Protein	1	971.3	971.3	1.048	PASS	0.908	1.031	0.894	0.979	0.83	0.795	0.879	0.836	0.808	0.857	1.066	0.876	1.053	0.976	0.913
7628-40_3	SL012774	Cysteine-rich with EGF-like domain protein 1	CREL1	Q96HD1	78987	CRELD1	Human	RFU	Protein	1	2706.1	2706.1	0.954	PASS	0.919	0.936	0.913	0.932	0.936	0.879	0.943	0.906	0.979	0.952	0.939	0.861	0.929	0.927	0.966
7638-30_3	SL005403	Vesicular integral-membrane protein VIP36	Lectin; mannose-binding 2	Q12907	10960	LMAN2	Human	RFU	Protein	1	10610	10610	1.786	FLAG	1.958	1.646	1.444	1.558	1.374	1.535	1.527	1.284	1.61	1.375	1.802	1.897	2.144	1.442	1.735
7640-29_3	SL013872	Low-density lipoprotein receptor-related protein 1B	LRP1B	Q9NZR2	53353	LRP1B	Human	RFU	Protein	0.005	40011.1	40011.1	1.754	FLAG	1.959	1.453	1.563	1.484	1.389	1.546	1.238	1.302	1.609	1.267	1.542	1.778	1.958	1.375	1.634
7648-9_3	SL017328	Myosin-binding protein C; slow-type	MYPC1	Q00872	4604	MYBPC1	Human	RFU	Protein	40	2821.15	2821.15	0.9	PASS	0.843	0.927	0.916	0.934	0.89	0.887	0.866	0.964	0.925	0.981	0.908	0.922	0.844	0.98	0.94
7655-11_3	SL002785	N-terminal pro-BNP	N-terminal pro-BNP	P16860	4879	NPPB	Human	RFU	Protein	40	5133.25	5133.25	0.814	PASS	0.881	0.829	0.903	0.825	0.766	0.784	0.833	0.832	0.815	0.839	0.829	0.82	0.76	0.886	0.896
7660-21_3	SL003646	Tropomyosin alpha-4 chain	Tropomyosin 4	P67936	7171	TPM4	Human	RFU	Protein	1	37562.5	37562.5	1.735	FLAG	1.839	1.388	1.364	1.424	1.005	1.093	1.076	1.168	1.251	1.04	1.248	1.254	1.442	1.301	1.423
8446-4_3	SL011508	Pituitary adenylate cyclase-activating polypeptide 27	PACAP-27	P18509	116	ADCYAP1	Human	RFU	Protein	40	366.65	366.65	1.166	PASS	1.191	1.298	1.365	1.348	1.107	1.104	1.207	1.158	1.112	1.21	1.31	1.266	1.106	1.341	1.346
8447-11_3	SL004269	Appetite-regulating hormone	ghrelin	Q9UBU3	51738	GHRL	Human	RFU	Protein	40	900.8	900.8	0.829	PASS	0.872	0.955	0.975	0.924	0.97	0.956	1.007	0.979	0.965	0.974	0.906	0.936	0.848	0.917	0.956
8450-36_3	SL011498	Pituitary adenylate cyclase-activating polypeptide 38	PACAP-38	P18509	116	ADCYAP1	Human	RFU	Protein	40	237.5	237.5	0.615	FLAG	0.607	0.775	0.736	0.788	0.95	0.761	0.881	0.927	0.724	0.861	0.819	0.779	0.57	0.816	0.701
8458-111_3	SL005266	Alpha-synuclein	a-Synuclein	P37840	6622	SNCA	Human	RFU	Protein	40	7560.25	7560.25	1.313	FLAG	1.245	1.074	0.71	1.053	0.673	0.676	1.461	0.555	0.882	0.659	1.355	0.696	1.328	0.629	0.949
8459-10_3	SL003993	Bone morphogenetic protein 6	BMP-6	P22004	654	BMP6	Human	RFU	Protein	40	17515.5	17515.5	1.005	PASS	0.971	1.09	0.882	1.003	0.785	0.826	0.93	0.891	0.919	0.903	1.078	0.915	1.03	1.133	0.876
8462-18_3	SL000442	Somatotropin	HGH	P01241	2688	GH1	Human	RFU	Protein	40	352.5	352.5	1.083	PASS	1.102	1.209	1.242	1.268	1.302	1.177	1.259	1.27	1.224	1.323	1.239	1.201	1.041	1.28	1.207
8463-2_3	SL003672	Extracellular superoxide dismutase [Cu-Zn]	SOD3	P08294	6649	SOD3	Human	RFU	Protein	0.005	712.25	712.25	1.262	FLAG	1.879	1.1	1.196	1.059	1.065	1.251	0.958	1.027	1.466	1.046	1.111	1.518	1.216	1.079	1.589
8464-31_3	SL012517	R-spondin-4	RSPO4	Q2I0M5	343637	RSPO4	Human	RFU	Protein	40	238.85	238.85	0.839	PASS	1.12	0.991	1.104	1.025	1.227	1.105	1.169	1.152	1.081	1.135	0.974	1.249	0.866	1.049	1.042
8465-52_3	SL000346	Cathepsin H	Cathepsin H	P09668	1512	CTSH	Human	RFU	Protein	40	731.7	731.7	0.61	FLAG	0.604	0.693	0.639	0.725	0.624	0.604	0.673	0.634	0.631	0.665	0.706	0.596	0.617	0.66	0.66
8467-9_3	SL004837	Inhibin beta A chain:Inhibin beta B chain heterodimer	Activin AB	P08476 P09529	3624 3625	INHBA INHBB	Human	RFU	Protein	40	715.65	715.65	0.777	PASS	0.759	0.89	0.841	0.917	0.873	0.82	0.957	0.882	0.806	0.897	0.92	0.764	0.809	0.911	0.833
8468-19_3	SL000062	Prostate-specific antigen	PSA	P07288	354	KLK3	Human	RFU	Protein	40	1474.6	1474.6	0.946	PASS	1.012	0.898	0.913	0.924	0.76	0.831	0.778	0.851	0.848	0.839	0.866	1.179	0.982	0.892	0.988
8469-41_3	SL000466	Insulin-like growth factor-binding protein 2	IGFBP-2	P18065	3485	IGFBP2	Human	RFU	Protein	0.005	579.7	579.7	1.424	FLAG	1.377	1.43	1.392	1.38	1.379	1.382	1.315	1.389	1.446	1.42	1.472	1.503	1.426	1.409	1.51
8470-213_3	SL017528	Ribonuclease H1	RNase H1	O60930	246243	RNASEH1	Human	RFU	Protein	40	277.55	277.55	1.183	PASS	1.171	1.277	1.291	1.307	1.292	1.258	1.281	1.302	1.258	1.321	1.334	1.199	1.129	1.315	1.259
8474-6_3	SL006114	Tyrosine-protein kinase transmembrane receptor ROR1	ROR1	Q01973	4919	ROR1	Human	RFU	Protein	1	527.15	527.15	1.022	PASS	0.951	1.006	1.046	1.021	0.931	0.937	0.981	0.993	1.031	1	1.03	0.902	0.979	1.099	1.119
8476-11_3	SL002762	Chromogranin-A	CgA	P10645	1113	CHGA	Human	RFU	Protein	1	6359.8	6359.8	1.244	FLAG	1.336	1.05	1.314	1.172	1.065	1.112	0.954	1.049	1.248	0.99	1.131	1.602	1.27	1.187	1.313
8479-4_3	SL000645	Stromelysin-2	MMP-10	P09238	4319	MMP10	Human	RFU	Protein	40	620.1	620.1	0.676	PASS	0.682	0.733	0.662	0.708	0.61	0.613	0.67	0.642	0.637	0.641	0.703	0.642	0.764	0.658	0.661
8480-29_3	SL006527	EGF-containing fibulin-like extracellular matrix protein 1	FBLN3	Q12805	2202	EFEMP1	Human	RFU	Protein	0.005	1246.1	1246.1	1.069	PASS	0.96	1.086	1.09	1.104	1.084	1.03	1.198	1.108	1.087	1.101	1.079	1.003	1.021	1.127	1.196
8484-24_3	SL000498	Leptin	Leptin	P41159	3952	LEP	Human	RFU	Protein	1	6634.6	6634.6	1.343	PASS	1.356	1.338	1.241	1.27	1.223	1.289	1.341	1.219	1.225	1.301	1.374	1.367	1.338	1.316	1.213
8485-7_3	SL017529	Kelch-like ECH-associated protein 1	KEAP1	Q14145	9817	KEAP1	Human	RFU	Protein	40	417.1	417.1	1.099	PASS	1.362	1.044	1.033	1.05	0.88	0.897	0.998	0.939	1.089	0.911	1	1.374	1.215	0.977	1.003
8488-33_3	SL000542	Integrin alpha-IIb: beta-3 complex	gpIIbIIIa	P08514 P05106	3674 3690	ITGA2B ITGB3	Human	RFU	Protein	40	4045.7	4045.7	1.191	FLAG	1.476	1.045	1.026	0.966	0.885	0.987	0.917	0.905	1.185	0.906	0.99	1.222	1.138	0.966	1.035
9168-31_3	SL003170	C-C motif chemokine 26	Eotaxin-3	Q9Y258	10344	CCL26	Human	RFU	Protein	40	1059.3	1059.3	1.692	FLAG	1.693	1.237	1.453	1.12	1.06	1.315	1.07	1.08	1.334	1.054	1.224	1.484	1.449	1.195	1.482
9169-14_3	SL018938	Small ubiquitin-related modifier 3	SUMO3	P55854	6613	SUMO3	Human	RFU	Protein	1	1509.7	1509.7	0.895	PASS	0.928	0.903	0.985	0.838	0.79	0.81	0.899	0.828	0.822	0.805	0.842	0.835	0.771	0.925	0.956
9170-24_3	SL001713	Interleukin-17A	IL-17	Q16552	3605	IL17A	Human	RFU	Protein	40	373.15	373.15	0.781	PASS	0.788	0.883	1.051	1.018	1.102	0.996	1.008	1.064	0.968	1.052	0.906	1.078	0.742	0.973	1.009
9171-11_3	SL016969	Cysteine and glycine-rich protein 3	CSRP3	P50461	8048	CSRP3	Human	RFU	Protein	40	1611.8	1611.8	1.601	FLAG	1.647	1.623	1.482	1.548	1.204	1.272	1.271	1.257	1.346	1.373	1.552	1.43	1.717	1.434	1.51
9172-69_3	SL000526	Neutrophil collagenase	MMP-8	P22894	4317	MMP8	Human	RFU	Protein	40	1435.55	1435.55	1.789	FLAG	2.158	1.567	1.607	1.522	1.307	1.491	1.354	1.37	1.775	1.484	1.516	2.1	2.351	1.566	1.719
9173-21_3	SL008094	Phosphoglucomutase-1	PGM1	P36871	5236	PGM1	Human	RFU	Protein	40	967.45	967.45	1.448	FLAG	1.295	1.381	1.308	1.298	1.182	1.218	1.259	1.181	1.256	1.271	1.374	1.279	1.373	1.367	1.373
9175-48_3	SL018891	Down syndrome cell adhesion molecule	DSCAM	O60469	1826	DSCAM	Human	RFU	Protein	40	1006.7	1006.7	1.741	FLAG	1.727	1.276	1.284	1.099	1.051	1.456	1.078	1.081	1.43	1.102	1.186	1.197	1.287	1.137	1.435
9176-3_3	SL000001	Mucin-1	MUC1	P15941	4582	MUC1	Human	RFU	Protein	40	1056	1056	1.172	PASS	1.157	1.15	1.128	1.118	0.945	0.982	0.991	0.99	1.002	0.974	1.149	1.055	1.193	1.073	1.082
9177-6_3	SL007306	Protein FAM3B	FAM3B	P58499	54097	FAM3B	Human	RFU	Protein	1	931	931	0.974	PASS	1.098	1.003	1.078	1.015	0.913	0.893	0.977	0.935	0.945	0.918	0.988	0.958	0.94	1.046	1.098
9178-30_3	SL004297	Neuregulin-1	NEUREGULIN-1	Q02297	3084	NRG1	Human	RFU	Protein	40	165.6	165.6	0.643	PASS	0.691	0.791	0.959	0.89	0.993	0.87	0.922	0.96	0.854	0.918	0.8	1.023	0.681	0.835	0.866
9180-6_3	SL007217	Interferon gamma receptor 2	INGR2	P38484	3460	IFNGR2	Human	RFU	Protein	40	462.9	462.9	0.839	PASS	0.848	0.903	0.944	0.933	0.946	0.945	0.967	0.933	0.974	0.96	0.914	1.134	1.085	0.906	0.952
9182-3_3	SL004733	Low-density lipoprotein receptor-related protein 1; soluble	sLRP1	Q07954	4035	LRP1	Human	RFU	Protein	40	1376	1376	1.07	PASS	1.149	0.815	0.927	0.782	0.711	1.038	0.776	0.769	0.851	0.769	0.796	1.288	1.164	0.796	1.038
9183-7_3	SL004475	Interferon alpha/beta receptor 1	IFN-a/b R1	P17181	3454	IFNAR1	Human	RFU	Protein	40	1581.65	1581.65	0.734	FLAG	0.592	0.738	0.577	0.774	0.661	0.655	0.691	0.638	0.691	0.703	0.756	0.63	0.843	0.65	0.649
9185-15_3	SL008591	Trefoil factor 1	TFF1	P04155	7031	TFF1	Human	RFU	Protein	40	3003.3	3003.3	0.9	PASS	1.048	0.947	1.092	0.897	0.983	0.961	1.089	1.019	1.034	1.039	0.899	0.908	0.831	1.007	1.096
9187-2_3	SL013165	Non-histone chromosomal protein HMG-14	HMGN1	P05114	3150	HMGN1	Human	RFU	Protein	1	612.85	612.85	0.903	FLAG	1.155	0.881	0.589	0.87	0.819	0.83	1.098	0.518	0.834	0.776	1.033	0.777	1.12	0.544	0.689
9188-119_3	SL003188	C-X-C motif chemokine 9	MIG	Q07325	4283	CXCL9	Human	RFU	Protein	40	477.45	477.45	0.933	PASS	1.289	0.905	0.967	0.908	0.955	0.938	0.953	0.956	0.957	0.969	0.894	1.15	0.953	0.939	1.049
9190-7_3	SL008837	CD63 antigen	CD63	P08962	967	CD63	Human	RFU	Protein	1	352.1	352.1	1.281	PASS	1.356	1.279	1.156	1.191	1.082	1.137	1.097	1.081	1.095	1.005	1.267	1.343	1.287	1.139	1.216
9191-8_3	SL002602	Trefoil factor 2	Trefoil factor 2	Q03403	7032	TFF2	Human	RFU	Protein	40	9612.3	9612.3	0.656	FLAG	0.74	0.671	0.664	0.626	0.562	0.592	0.685	0.609	0.622	0.588	0.617	0.645	0.682	0.653	0.654
9196-8_3	SL005166	Galectin-7	Galectin-7	P47929	3963	LGALS7	Human	RFU	Protein	1	543.2	543.2	1.129	PASS	0.987	0.995	0.885	1.041	0.931	0.883	0.908	0.851	1.013	0.88	1.093	0.937	1.08	0.95	0.914
9197-4_3	SL008486	Galectin-9	LEG9	O00182	3965	LGALS9	Human	RFU	Protein	40	1379.95	1379.95	1.156	FLAG	1.474	1.181	1.06	1.035	0.932	1.044	1.208	0.937	0.977	0.967	1.175	1.177	1.524	0.986	1.168
9199-6_3	SL018946	Ubiquitin-conjugating enzyme E2 G2	UB2G2	P60604	7327	UBE2G2	Human	RFU	Protein	1	4667.95	4667.95	0.774	FLAG	0.77	0.804	0.595	0.724	0.621	0.656	0.749	0.64	0.637	0.692	0.816	0.648	0.791	0.703	0.628
9201-13_3	SL004811	Transgelin-2	Transgelin-2	P37802	8407	TAGLN2	Human	RFU	Protein	1	3630.25	3630.25	0.972	PASS	0.885	0.947	0.882	0.891	0.854	0.837	0.883	0.84	0.851	0.816	0.921	0.819	0.922	0.916	0.842
9202-309_3	SL008113	ATP synthase subunit O; mitochondrial	ATPO	P48047	539	ATP5O	Human	RFU	Protein	40	2103.5	2103.5	0.613	FLAG	0.606	0.596	0.497	0.623	0.56	0.522	0.408	0.472	0.507	0.532	0.579	0.553	0.557	0.507	0.405
9204-33_3	SL009210	Pro-opiomelanocortin	Corticotropin-lipotropin	P01189	5443	POMC	Human	RFU	Protein	40	833.6	833.6	0.708	PASS	0.753	0.8	0.834	0.774	0.784	0.769	0.851	0.8	0.797	0.812	0.768	0.743	0.668	0.8	0.864
9207-60_3	SL018887	Quinone oxidoreductase-like protein 1	QORL1	O95825	9946	CRYZL1	Human	RFU	Protein	1	1800.8	1800.8	1.823	FLAG	1.575	2.039	1.513	1.779	1.602	1.609	1.675	1.57	1.689	1.758	2.118	1.482	2.007	1.769	1.601
9211-19_3	SL003066	Pigment epithelium-derived factor	PEDF	P36955	5176	SERPINF1	Human	RFU	Protein	0.005	51067.6	51067.6	1.054	PASS	1.033	1.005	1.094	0.99	0.992	1.032	1.001	0.969	1.03	0.895	0.986	0.968	1.047	1.021	1.048
9212-22_3	SL008381	Cathepsin F	CATF	Q9UBX1	8722	CTSF	Human	RFU	Protein	1	2228.85	2228.85	1.281	PASS	1.116	1.35	1.117	1.192	1.192	0.993	1.154	1.077	1.022	1.083	1.348	1.109	1.236	1.2	1.118
9213-24_3	SL018900	Formimidoyltransferase-cyclodeaminase	FTCD	O95954	10841	FTCD	Human	RFU	Protein	40	3928.45	3928.45	1.471	FLAG	0.863	1.259	1.934	1.216	1.433	1.439	0.8	1.363	1.729	2.711	0.936	0.805	1.253	0.948	3.205
9215-117_3	SL018947	Ubiquitin carboxyl-terminal hydrolase 25	UBP25	Q9UHP3	29761	USP25	Human	RFU	Protein	40	948.35	948.35	1.407	FLAG	1.799	1.374	1.448	1.39	1.22	1.323	1.155	1.234	1.263	1.266	1.381	1.517	1.875	1.433	1.603
9216-100_3	SL009948	Plexin-B2	PLXB2	O15031	23654	PLXNB2	Human	RFU	Protein	1	3999.45	3999.45	1.322	PASS	1.263	1.26	1.162	1.148	1.039	1.096	1.068	1.091	1.119	1.139	1.213	1.36	1.248	1.184	1.12
